# Supplementary material for: Endothelial cell-targeting aptamer-empowered exosomes accelerate wound healing by promoting specialized angiogenesis in type 1 diabetic mice
Source: Research Square preprint supplement (doi:10.21203/rs.3.rs-7518048/v1), 2025-10-17
Supplement: Supplementary file 1 [file 99b3cc90f193f135fc82ef91.xlsx]

## Sheet: SC_EVvsSC
Protein accession	Protein description	Gene name	SC_EV/SC Ratio	SC_EV/SC P value	Regulated Type	Coverage [%]	Peptides	PSMs	Unique Peptides	Razor + unique peptides	MW [kDa]	Intensity SC1	Intensity SC2	Intensity SC3	Intensity SC_EV1	Intensity SC_EV2	Intensity SC_EV3	SC1	SC2	SC3	SC_EV1	SC_EV2	SC_EV3
O14966	Ras-related protein Rab-7L1 OS=Homo sapiens OX=9606 GN=RAB29 PE=1 SV=1	RAB29	413.229	0.000217577	Up	20	4	30	3	3	23.1	1.2225e+06	1.73842e+06	433470	1.81343e+08	2.07543e+08	2.07668e+08	0.0092375	0.0144184	0.00286174	3.24225	4.13183	3.58378
P35052	Glypican-1 OS=Homo sapiens OX=9606 GN=GPC1 PE=1 SV=2	GPC1	168.861	0.000246552	Up	18	7	38	7	7	61.6	243638	179546	534849	1.35546e+07	3.29045e+07	1.51337e+07	0.0243657	0.019709	0.0467337	3.20747	8.66997	3.45655
P01591	Immunoglobulin J chain OS=Homo sapiens OX=9606 GN=JCHAIN PE=1 SV=4	JCHAIN	153.75	3.87967e-08	Up	7	2	19	2	2	18.1	796693	634457	804746	4.63799e+07	4.34097e+07	4.97212e+07	0.0319041	0.0278877	0.0281565	4.39466	4.58004	4.54738
Q9H0H5	Rac GTPase-activating protein 1 OS=Homo sapiens OX=9606 GN=RACGAP1 PE=1 SV=1	RACGAP1	70.701	2.89628e-05	Up	14	7	17	7	7	71	349817	437763	526138	1.54712e+07	1.27579e+07	9.18853e+06	0.0528621	0.0726103	0.0694654	5.53181	5.07936	3.17113
O75487	Glypican-4 OS=Homo sapiens OX=9606 GN=GPC4 PE=1 SV=4	GPC4	53.804	3.02706e-07	Up	22	10	56	9	9	62.4	301249	248201	352975	6.12102e+06	6.43502e+06	7.01535e+06	0.0693732	0.0627371	0.0710191	3.33527	3.9043	3.6896
Q13206	Probable ATP-dependent RNA helicase DDX10 OS=Homo sapiens OX=9606 GN=DDX10 PE=1 SV=2	DDX10	51.3706	2.6986e-07	Up	2	2	9	2	2	100.8	485438	457823	487713	9.7237e+06	9225515	1.10901e+07	0.0988654	0.102344	0.086784	4.68579	4.95027	5.15836
Q6N022	Teneurin-4 OS=Homo sapiens OX=9606 GN=TENM4 PE=1 SV=2	TENM4	41.8437	4.24597e-07	Up	1	2	3	2	2	307.8	622033	586662	738610	1.00325e+07	1.03032e+07	1.27382e+07	0.122674	0.126994	0.127268	4.68155	5.35355	5.73736
P17066	Heat shock 70 kDa protein 6 OS=Homo sapiens OX=9606 GN=HSPA6 PE=1 SV=2	HSPA6	41.5769	8.83855e-05	Up	14	11	195	2	2	71	71901.8		75965.1	1.31217e+06	892756	1.3865e+06	0.058747		0.0542281	2.53675	1.92179	2.5872
Q9UIC8	Leucine carboxyl methyltransferase 1 OS=Homo sapiens OX=9606 GN=LCMT1 PE=1 SV=2	LCMT1	37.9071	4.51347e-06	Up	17	5	29	5	5	38.4	7.40461e+06	5.54649e+06	6.96005e+06	9.64602e+07	8.46432e+07	1.273e+08	0.131732	0.108308	0.108184	4.06047	3.96741	5.17228
Q9NXC5	GATOR complex protein MIOS OS=Homo sapiens OX=9606 GN=MIOS PE=1 SV=2	MIOS	32.6888	5.75015e-07	Up	9	6	24	6	6	98.5	11966106	1.16177e+07	1.24033e+07	1.61741e+08	1.38033e+08	1.82094e+08	0.137226	0.146237	0.124276	4.38876	4.17054	4.76917
Q8TDB4	Protein MGARP OS=Homo sapiens OX=9606 GN=MGARP PE=1 SV=1	MGARP	32.4664	1.71907e-06	Up	22	4	27	4	4	25.4	8.66174e+06	7.44858e+06	7.79988e+06	1.15362e+08	9.15616e+07	1.11088e+08	0.125119	0.118099	0.09844	3.94297	3.48465	3.66482
Q96JB1	Dynein axonemal heavy chain 8 OS=Homo sapiens OX=9606 GN=DNAH8 PE=1 SV=2	DNAH8	32.3996	5.65021e-06	Up	0	2	32	2	2	514.3	1.02131e+07	9.03906e+06	8.78856e+06	1.2436e+08	126966216	1.19259e+08	0.151098	0.146785	0.113602	4.35337	4.94902	4.02959
O60245	Protocadherin-7 OS=Homo sapiens OX=9606 GN=PCDH7 PE=1 SV=2	PCDH7	31.787	3.07819e-06	Up	11	9	44	9	9	116	2.00536e+06	1.51906e+06	1.80349e+06	2.49601e+07	2.21466e+07	2.16409e+07	0.144754	0.120356	0.113741	4.2631	4.21184	3.56761
Q5HYK7	SH3 domain-containing protein 19 OS=Homo sapiens OX=9606 GN=SH3D19 PE=1 SV=2	SH3D19	31.6477	0.00593342	Up	5	4	4	4	4	86.5	376948	635858	5.05495e+06	24257920	26496108	20397462	0.0232214	0.0429955	0.272075	3.53591	4.30048	2.86978
P61927	60S ribosomal protein L37 OS=Homo sapiens OX=9606 GN=RPL37 PE=1 SV=2	RPL37	31.5754	1.05838e-05	Up	19	2	34	2	2	11.1	2.43282e+06	2.3835e+06	4.18937e+06	3.98744e+07	3.40997e+07	3.97619e+07	0.126772	0.136327	0.190733	4.9164	4.68155	4.73199
Q9Y2I7	1-phosphatidylinositol 3-phosphate 5-kinase OS=Homo sapiens OX=9606 GN=PIKFYVE PE=1 SV=3	PIKFYVE	30.7248	1.87491e-08	Up	1	2	9	2	2	237	1.40596e+06	1.20378e+06	1.601e+06	17513788	15831871	19099858	0.137847	0.129547	0.137145	4.06297	4.08961	4.27679
Q9Y2S2	Lambda-crystallin homolog OS=Homo sapiens OX=9606 GN=CRYL1 PE=1 SV=3	CRYL1	29.9065	4.93787e-06	Up	7	2	2	2	2	35.4	188601	196927	301232	2.92225e+06	2355583	3.00158e+06	0.105847	0.12131	0.147707	3.88056	3.48306	3.84725
P00742	Coagulation factor X OS=Homo sapiens OX=9606 GN=F10 PE=1 SV=2	F10	29.519	6.82651e-05	Up	10	4	30	4	4	54.7	712683	930021	1.58398e+06	1.40175e+07	1.18983e+07	1.20445e+07	0.0773435	0.110784	0.150191	3.59949	3.40205	2.98526
P28340	DNA polymerase delta catalytic subunit OS=Homo sapiens OX=9606 GN=POLD1 PE=1 SV=2	POLD1	28.9521	1.12487e-05	Up	3	3	11	2	2	123.6	323755	232645	433697	4269353	3.22447e+06	4001947	0.135771	0.107088	0.158907	4.23637	3.56268	3.8329
O60942	mRNA-capping enzyme OS=Homo sapiens OX=9606 GN=RNGTT PE=1 SV=1	RNGTT	28.9164	1.44267e-05	Up	10	4	59	4	4	68.5	1.49517e+07	1.03261e+07	1.97227e+07	1.76519e+08	1.45392e+08	2.00384e+08	0.142591	0.108091	0.164336	3.9832	3.65316	4.36444
Q8N3P4	Vacuolar protein sorting-associated protein 8 homolog OS=Homo sapiens OX=9606 GN=VPS8 PE=1 SV=3	VPS8	28.6392	1.071e-06	Up	7	8	27	8	8	161.7	2.824e+07	2.41634e+07	3.38648e+07	3.22939e+08	2.83018e+08	3.96676e+08	0.145638	0.13678	0.152589	3.94068	3.84549	4.67208
O43826	Glucose-6-phosphate exchanger SLC37A4 OS=Homo sapiens OX=9606 GN=SLC37A4 PE=1 SV=1	SLC37A4	27.4359	3.75165e-06	Up	5	2	10	2	2	46.3	3.61798e+06	3.32193e+06	5.33736e+06	4.46626e+07	3.91791e+07	5.18159e+07	0.150544	0.151721	0.19404	4.39728	4.29518	4.9241
Q12974	Protein tyrosine phosphatase type IVA 2 OS=Homo sapiens OX=9606 GN=PTP4A2 PE=1 SV=1	PTP4A2	27.0367	9.60154e-06	Up	32	6	32	6	6	19.1	5.90097e+06	5.13538e+06	6.21486e+06	70306614	6.53651e+07	5.26209e+07	0.139489	0.133243	0.128355	3.93236	4.0709	2.84079
P48060	Glioma pathogenesis-related protein 1 OS=Homo sapiens OX=9606 GN=GLIPR1 PE=1 SV=3	GLIPR1	26.9437	0.00204881	Up	19	3	27	3	3	30.3	1.92945e+06	385071	1.92988e+06	14945933	1.26095e+07	1.76106e+07	0.223172	0.0488881	0.19503	4.09045	3.84267	4.65206
Q5H9U9	Probable ATP-dependent RNA helicase DDX60-like OS=Homo sapiens OX=9606 GN=DDX60L PE=2 SV=2	DDX60L	25.9252	5.53014e-07	Up	6	7	14	5	5	197.5	3.76666e+06	3.7644e+06	4.14341e+06	3.87886e+07	39949112	44482860	0.149794	0.16432	0.143966	3.64992	4.18575	4.04014
O15118	NPC intracellular cholesterol transporter 1 OS=Homo sapiens OX=9606 GN=NPC1 PE=1 SV=2	NPC1	25.8331	2.48412e-05	Up	5	4	19	4	4	142.1	1.58264e+06	1.54117e+06	1.54083e+06	14854396	12745522	22170652	0.135277	0.144593	0.11507	3.00426	2.8703	4.32798
Q12933	TNF receptor-associated factor 2 OS=Homo sapiens OX=9606 GN=TRAF2 PE=1 SV=2	TRAF2	24.7284	1.03571e-06	Up	4	2	65	2	2	55.8	2.95027e+07	2.46762e+07	2.95751e+07	2.61375e+08	2.57203e+08	3.24983e+08	0.177251	0.162728	0.155246	3.71564	4.07129	4.45917
P21359	Neurofibromin OS=Homo sapiens OX=9606 GN=NF1 PE=1 SV=2	NF1	24.5757	8.10718e-07	Up	4	9	40	9	9	319.2	8.77916e+06	7.73908e+06	9.59448e+06	8.05538e+07	7.81625e+07	1.02456e+08	0.168468	0.163008	0.160861	3.65755	3.95175	4.4902
O43301	Heat shock 70 kDa protein 12A OS=Homo sapiens OX=9606 GN=HSPA12A PE=1 SV=2	HSPA12A	23.8429	4.35986e-07	Up	3	2	4	2	2	74.9	7.7945e+07	7.21518e+07	8.41947e+07	705960960	741663488	821494080	0.167872	0.170566	0.158431	3.59758	4.20846	4.04072
Q14004	Cyclin-dependent kinase 13 OS=Homo sapiens OX=9606 GN=CDK13 PE=1 SV=2	CDK13	23.7971	3.08197e-05	Up	2	3	14	2	2	164.8	2865385	3.42513e+06	3.10006e+06	29707406	34274476	26934844	0.15832	0.207724	0.149654	3.88382	4.98944	3.39886
Q9HBG6	Intraflagellar transport protein 122 homolog OS=Homo sapiens OX=9606 GN=IFT122 PE=1 SV=2	IFT122	23.6234	1.29259e-07	Up	2	2	10	2	2	141.7	5.70296e+06	5.40611e+06	6270387	55770484	49102624	62610012	0.169457	0.176319	0.162787	3.92107	3.84407	4.24882
O95837	Guanine nucleotide-binding protein subunit alpha-14 OS=Homo sapiens OX=9606 GN=GNA14 PE=1 SV=1	GNA14	23.2701	4.52827e-05	Up	19	6	81	2	2	41.5	7.07651e+06	9818135	10858108	102007936	85749808	73961792	0.133464	0.203249	0.178922	4.55217	4.26093	3.18578
Q9UFH2	Dynein axonemal heavy chain 17 OS=Homo sapiens OX=9606 GN=DNAH17 PE=1 SV=3	DNAH17	23.1988	1.80774e-05	Up	0	2	7	2	2	509	732052	860247	795363	7.79836e+06	8.01984e+06	6.75492e+06	0.171712	0.221481	0.163	4.32814	4.95622	3.61862
O00470	Homeobox protein Meis1 OS=Homo sapiens OX=9606 GN=MEIS1 PE=1 SV=1	MEIS1	22.9743	3.63129e-06	Up	9	4	14	4	4	43	5.08541e+06	3877281	6.5772e+06	4.96597e+07	4.38632e+07	4.97251e+07	0.165831	0.138779	0.18739	3.83164	3.76849	3.70323
Q9H8H2	Probable ATP-dependent RNA helicase DDX31 OS=Homo sapiens OX=9606 GN=DDX31 PE=1 SV=2	DDX31	22.9146	2.19983e-05	Up	4	3	11	3	3	94	8.93074e+06	1.01147e+07	1.37663e+07	108871864	106070600	86516216	0.146622	0.182273	0.197467	4.22931	4.58813	3.24396
P27169	Serum paraoxonase/arylesterase 1 OS=Homo sapiens OX=9606 GN=PON1 PE=1 SV=3	PON1	22.7679	5.77493e-06	Up	5	2	9	2	2	39.7	736018	503810	835252	6.49617e+06	6.09665e+06	6.36205e+06	0.213887	0.160701	0.212069	4.46677	4.66783	4.22239
O60306	RNA helicase aquarius OS=Homo sapiens OX=9606 GN=AQR PE=1 SV=4	AQR	22.3471	6.489e-07	Up	11	12	32	12	12	171.2	2.14323e+07	2.19428e+07	2.50245e+07	1.94199e+08	1.99598e+08	2.27861e+08	0.179757	0.202006	0.183378	3.85394	4.41062	4.36467
Q969S9	Ribosome-releasing factor 2, mitochondrial OS=Homo sapiens OX=9606 GN=GFM2 PE=1 SV=1	GFM2	21.5792	1.32692e-05	Up	12	8	113	8	8	86.5	3.2717e+07	2.23948e+07	3.91896e+07	2.5971e+08	2.36702e+08	3.22782e+08	0.204638	0.153751	0.214166	3.84365	3.90071	4.61092
Q9UBM4	Opticin OS=Homo sapiens OX=9606 GN=OPTC PE=1 SV=1	OPTC	21.462	8.82264e-06	Up	6	2	5	2	2	37.2	3.61835e+06	2.35242e+06	3463260	30321789	2.45196e+07	2.70017e+07	0.171033	0.12205	0.143027	3.39129	3.05358	2.91491
P54760	Ephrin type-B receptor 4 OS=Homo sapiens OX=9606 GN=EPHB4 PE=1 SV=2	EPHB4	21.396	5.90942e-06	Up	6	5	27	4	4	108.2	3.01886e+07	2.62055e+07	2.55532e+07	2.50999e+08	2.25585e+08	2.41169e+08	0.210619	0.20068	0.155763	4.1435	4.1466	3.84275
Q07889	Son of sevenless homolog 1 OS=Homo sapiens OX=9606 GN=SOS1 PE=1 SV=1	SOS1	21.1456	3.41296e-06	Up	1	2	11	2	2	152.4	1.10323e+06	964930	1.03233e+06	8.1719e+06	8.33793e+06	1.02867e+07	0.195103	0.187306	0.159508	3.41951	3.88495	4.15472
Q96FN4	Copine-2 OS=Homo sapiens OX=9606 GN=CPNE2 PE=1 SV=3	CPNE2	21.1125	3.8865e-07	Up	9	5	132	4	4	61.2	1.21037e+07	1.10449e+07	1.29571e+07	1.1446e+08	9.33045e+07	1.02389e+08	0.19368	0.193992	0.181151	4.33374	3.93367	3.74186
Q14320	Protein FAM50A OS=Homo sapiens OX=9606 GN=FAM50A PE=1 SV=2	FAM50A	20.2121	5.89672e-08	Up	26	7	45	7	7	40.2	125551732	104318430	1.33315e+08	996062279	916159290	1066482337	0.208282	0.189953	0.193228	3.90981	4.0043	4.04061
Q96T83	Sodium/hydrogen exchanger 7 OS=Homo sapiens OX=9606 GN=SLC9A7 PE=1 SV=1	SLC9A7	20.2041	6.28578e-05	Up	2	2	18	2	2	80.1	1.45863e+07	1.36568e+07	1.81503e+07	1.42801e+08	1.39205e+08	9.34006e+07	0.188812	0.19404	0.205274	4.37379	4.74753	2.76121
P20594	Atrial natriuretic peptide receptor 2 OS=Homo sapiens OX=9606 GN=NPR2 PE=1 SV=1	NPR2	20.1611	3.65334e-06	Up	5	3	18	3	3	116.9	292301	207508	330378	2378102	1.97771e+06	2.39386e+06	0.176401	0.137456	0.174199	3.3958	3.14457	3.29939
O60879	Protein diaphanous homolog 2 OS=Homo sapiens OX=9606 GN=DIAPH2 PE=1 SV=1	DIAPH2	20.1131	2.26924e-05	Up	4	4	38	4	4	125.5	3.30282e+06	2.78039e+06	4.66449e+06	33088100	2.8386e+07	2.48271e+07	0.172943	0.159801	0.213397	4.09951	3.91607	2.969
P55212	Caspase-6 OS=Homo sapiens OX=9606 GN=CASP6 PE=1 SV=2	CASP6	20.1005	0.000354049	Up	28	5	24	4	4	33.3	1.45802e+07	6.39312e+06	1.84609e+07	96065712	1.093e+08	1.06423e+08	0.218131	0.104984	0.241309	3.40067	4.30825	3.63626
O95260	Arginyl-tRNA--protein transferase 1 OS=Homo sapiens OX=9606 GN=ATE1 PE=1 SV=2	ATE1	20.0866	5.40618e-07	Up	9	3	13	3	3	59.1	6.13697e+06	6.52376e+06	7.39772e+06	5.70058e+07	5.17557e+07	5.50341e+07	0.182404	0.21283	0.192107	4.00903	4.05289	3.73574
P19388	DNA-directed RNA polymerases I, II, and III subunit RPABC1 OS=Homo sapiens OX=9606 GN=POLR2E PE=1 SV=4	POLR2E	19.9694	1.33985e-06	Up	44	6	23	6	6	24.5	2.95574e+07	2.70748e+07	3.11064e+07	245244976	2.39291e+08	225795920	0.202433	0.203533	0.186135	3.97425	4.31786	3.53179
P14543	Nidogen-1 OS=Homo sapiens OX=9606 GN=NID1 PE=1 SV=3	NID1	19.7037	1.77492e-06	Up	13	11	34	11	11	136.3	425710	458525	594468	4.08948e+06	3.38784e+06	4.35079e+06	0.150027	0.177368	0.183041	3.41008	3.14561	3.50177
O00214	Galectin-8 OS=Homo sapiens OX=9606 GN=LGALS8 PE=1 SV=4	LGALS8	19.6558	5.87595e-05	Up	9	3	9	3	3	35.8	7.81589e+06	5.75195e+06	1.27317e+07	7.02268e+07	6.65305e+07	6.78326e+07	0.199015	0.16076	0.283243	4.23109	4.4633	3.94468
Q99611	Selenide, water dikinase 2 OS=Homo sapiens OX=9606 GN=SEPHS2 PE=1 SV=3	SEPHS2	19.6096	1.41763e-06	Up	11	3	16	3	3	47.3	5.22045e+06	4.57012e+06	6.63303e+06	4.03999e+07	39984408	49672632	0.206447	0.198374	0.229181	3.78026	4.166	4.48625
Q969Z0	FAST kinase domain-containing protein 4 OS=Homo sapiens OX=9606 GN=TBRG4 PE=1 SV=1	TBRG4	19.5905	2.18603e-06	Up	8	4	13	4	4	70.7	1.00869e+07	7.1607e+06	1.05446e+07	7.46975e+07	6.82847e+07	7.68071e+07	0.235641	0.183614	0.215222	4.12896	4.20286	4.09789
O60447	Ecotropic viral integration site 5 protein homolog OS=Homo sapiens OX=9606 GN=EVI5 PE=1 SV=3	EVI5	19.507	1.11807e-05	Up	5	4	28	4	4	92.9	1.38484e+07	9.7954e+06	1.51576e+07	9.92627e+07	83200875	124410568	0.22995	0.17853	0.219902	3.89996	3.63989	4.71797
Q9NUP9	Protein lin-7 homolog C OS=Homo sapiens OX=9606 GN=LIN7C PE=1 SV=1	LIN7C	19.4999	0.000168912	Up	43	7	76	4	4	21.8	5.02344e+06	4891350	3.1186e+06	3.68934e+07	3.45708e+07	3.38917e+07	0.193021	0.206295	0.104695	3.35423	3.49978	2.97414
Q9BTD8	RNA-binding protein 42 OS=Homo sapiens OX=9606 GN=RBM42 PE=1 SV=1	RBM42	19.3839	3.76211e-06	Up	12	2	11	2	2	50.4	1.0183e+07	7.0858e+06	1.07603e+07	73839968	64666632	81130160	0.214747	0.16402	0.198263	3.68455	3.59303	3.90751
Q9Y4G8	Rap guanine nucleotide exchange factor 2 OS=Homo sapiens OX=9606 GN=RAPGEF2 PE=1 SV=1	RAPGEF2	19.1642	5.09643e-06	Up	3	3	6	3	3	167.3	3.92363e+06	3153618	3.67559e+06	26136888	24349212	33749392	0.216851	0.19131	0.177487	3.41797	3.54557	4.25995
Q5T0N5	Formin-binding protein 1-like OS=Homo sapiens OX=9606 GN=FNBP1L PE=1 SV=3	FNBP1L	19.1513	1.84929e-06	Up	15	7	26	7	7	70	4.76473e+07	4.34452e+07	4.58169e+07	337792928	3.39844e+08	3.93094e+08	0.210674	0.210848	0.176996	3.53397	3.95894	3.96948
Q8NC42	E3 ubiquitin-protein ligase RNF149 OS=Homo sapiens OX=9606 GN=RNF149 PE=2 SV=2	RNF149	18.9719	2.88565e-06	Up	13	4	27	4	4	43.1	811253	874717	1.14275e+06	7.25217e+06	6.21166e+06	8.32927e+06	0.188849	0.223502	0.23242	3.99454	3.80973	4.42823
P55789	FAD-linked sulfhydryl oxidase ALR OS=Homo sapiens OX=9606 GN=GFER PE=1 SV=2	GFER	18.9435	0.000205722	Up	13	2	17	2	2	23.4	1.39521e+06	647506	807102	7.45522e+06	7.32512e+06	7.14263e+06	0.320152	0.163085	0.161811	4.04777	4.42851	3.74316
P16989	Y-box-binding protein 3 OS=Homo sapiens OX=9606 GN=YBX3 PE=1 SV=4	YBX3	18.9022	9.45535e-07	Up	12	5	81	2	2	40.1	1.61895e+07	1.25439e+07	1.54127e+07	1.13685e+08	1.04544e+08	1.21014e+08	0.235609	0.200377	0.195977	3.91475	4.00855	4.02218
Q8WV41	Sorting nexin-33 OS=Homo sapiens OX=9606 GN=SNX33 PE=1 SV=1	SNX33	18.6801	8.23155e-07	Up	8	4	17	4	4	65.2	4.55656e+06	3.91447e+06	4.87797e+06	3.60262e+07	3.27797e+07	3.21319e+07	0.226276	0.213368	0.211644	4.23312	4.28877	3.6442
Q9H063	Repressor of RNA polymerase III transcription MAF1 homolog OS=Homo sapiens OX=9606 GN=MAF1 PE=1 SV=2	MAF1	18.5021	1.30096e-06	Up	8	2	4	2	2	28.8	4.57292e+07	3.88722e+07	5.78651e+07	336478432	327613216	399159552	0.203323	0.189708	0.224788	3.53989	3.83779	4.05325
Q13769	THO complex subunit 5 homolog OS=Homo sapiens OX=9606 GN=THOC5 PE=1 SV=2	THOC5	18.3661	6.21798e-06	Up	15	6	23	6	6	78.5	1.0039e+08	9.01057e+07	8.66509e+07	7.16877e+08	6.55038e+08	7.13118e+08	0.231301	0.227873	0.174431	3.90815	3.9763	3.75242
Q969P0	Immunoglobulin superfamily member 8 OS=Homo sapiens OX=9606 GN=IGSF8 PE=1 SV=1	IGSF8	18.1471	0.00023343	Up	6	3	4	3	3	65		187826	273410	1.72286e+06	1.77906e+06	1.46709e+06		0.144996	0.168006	2.86705	3.29658	2.3565
P07948	Tyrosine-protein kinase Lyn OS=Homo sapiens OX=9606 GN=LYN PE=1 SV=3	LYN	18.0264	8.33119e-06	Up	14	5	20	3	3	58.5	1.0372e+07	7.00692e+06	11813595	7.16842e+07	6.34429e+07	7.65836e+07	0.216109	0.160249	0.215059	3.53407	3.48274	3.64428
Q7Z7A1	Centriolin OS=Homo sapiens OX=9606 GN=CNTRL PE=1 SV=2	CNTRL	18.0205	0.000104495	Up	1	3	16	2	2	268.7	3.91969e+06	5.62886e+06	4.1826e+06	3.17258e+07	2.81078e+07	4.32183e+07	0.178199	0.280886	0.166137	3.41277	3.36673	4.48732
Q12913	Receptor-type tyrosine-protein phosphatase eta OS=Homo sapiens OX=9606 GN=PTPRJ PE=1 SV=3	PTPRJ	17.8599	1.41746e-05	Up	5	4	14	4	4	145.9	3.96876e+06	2.8729e+06	4.82728e+06	3.21498e+07	2.54052e+07	2.60621e+07	0.235472	0.187094	0.250237	4.5134	3.97132	3.5315
Q92599	Septin-8 OS=Homo sapiens OX=9606 GN=SEPTIN8 PE=1 SV=4	SEPTIN8	17.8247	1.4688e-06	Up	40	15	184	10	10	55.7	7.84897e+07	7.47382e+07	8.55724e+07	5.81784e+08	4.81248e+08	6.78441e+08	0.204618	0.21386	0.194908	3.58867	3.30542	4.03932
Q14997	Proteasome activator complex subunit 4 OS=Homo sapiens OX=9606 GN=PSME4 PE=1 SV=2	PSME4	17.7958	1.96223e-06	Up	6	10	80	10	10	211.2	7.57074e+06	7.24048e+06	7.57313e+06	5.95124e+07	4.62403e+07	5.7475e+07	0.228635	0.240008	0.199822	4.25257	3.67918	3.96412
Q8NEW0	Zinc transporter 7 OS=Homo sapiens OX=9606 GN=SLC30A7 PE=2 SV=1	SLC30A7	17.7753	9.61764e-06	Up	20	6	65	6	6	41.6	4.89895e+07	4.08653e+07	4.22998e+07	3.26871e+08	3.25055e+08	3.04405e+08	0.231555	0.212013	0.174684	3.65568	4.04795	3.28601
O95248	Myotubularin-related protein 5 OS=Homo sapiens OX=9606 GN=SBF1 PE=1 SV=4	SBF1	17.7383	7.19537e-05	Up	2	3	49	3	3	208.3	3.7397e+06	4.62947e+06	3.56597e+06	3.20204e+07	2.95878e+07	2.54037e+07	0.246376	0.334771	0.20526	4.99147	5.13573	3.82229
Q16864	V-type proton ATPase subunit F OS=Homo sapiens OX=9606 GN=ATP6V1F PE=1 SV=2	ATP6V1F	17.6105	2.72651e-05	Up	24	2	24	2	2	13.4	4.9429e+06	3.20313e+06	6.08593e+06	3.16536e+07	31094682	37560544	0.208337	0.148188	0.224117	3.15681	3.45301	3.6156
Q14999	Cullin-7 OS=Homo sapiens OX=9606 GN=CUL7 PE=1 SV=2	CUL7	17.5563	1.36582e-05	Up	3	4	23	4	4	191	5.75775e+06	4.52261e+06	7.94007e+06	4.71577e+07	4.02169e+07	4.04977e+07	0.204609	0.176408	0.246526	3.96521	3.76538	3.28676
Q9NRY4	Rho GTPase-activating protein 35 OS=Homo sapiens OX=9606 GN=ARHGAP35 PE=1 SV=3	ARHGAP35	17.5235	1.55689e-05	Up	14	12	44	11	11	170.4	9.12738e+06	1.14444e+07	1.42968e+07	8.74483e+07	6.88497e+07	9.22343e+07	0.158694	0.218406	0.21718	3.59755	3.15387	3.66245
Q4G0J3	La-related protein 7 OS=Homo sapiens OX=9606 GN=LARP7 PE=1 SV=1	LARP7	17.3484	6.49912e-07	Up	8	4	14	4	4	66.9	4.09941e+07	4.29116e+07	4.85636e+07	301106528	288602752	346598912	0.188349	0.216408	0.194948	3.27344	3.49358	3.63693
Q9Y4W6	AFG3-like protein 2 OS=Homo sapiens OX=9606 GN=AFG3L2 PE=1 SV=2	AFG3L2	17.2276	9.45461e-07	Up	28	17	151	17	17	88.5	2.88651e+07	2.68978e+07	3.24675e+07	2.10115e+08	2.07429e+08	1.97443e+08	0.20351	0.208155	0.199999	3.50519	3.85311	3.17921
Q6YHK3	CD109 antigen OS=Homo sapiens OX=9606 GN=CD109 PE=1 SV=2	CD109	16.3356	1.63235e-06	Up	17	21	157	21	21	161.6	6.55609e+06	4.84294e+06	7.04478e+06	4.04522e+07	3.71648e+07	4.41572e+07	0.260737	0.211408	0.244788	3.80663	3.89419	4.01074
Q05655	Protein kinase C delta type OS=Homo sapiens OX=9606 GN=PRKCD PE=1 SV=2	PRKCD	16.3271	1.50207e-06	Up	13	7	41	6	6	77.5	4.79742e+06	4.2438e+06	5032353	2.91227e+07	3.17552e+07	3.22242e+07	0.26066	0.253091	0.238892	3.74403	4.54578	3.99865
Q16799	Reticulon-1 OS=Homo sapiens OX=9606 GN=RTN1 PE=1 SV=1	RTN1	16.2063	3.099e-07	Up	13	7	69	6	7	83.6	2.4252e+07	2.28384e+07	3.04701e+07	1.83979e+08	1.48221e+08	1.77292e+08	0.238853	0.246892	0.262194	4.28738	3.84612	3.98783
Q9H9T3	Elongator complex protein 3 OS=Homo sapiens OX=9606 GN=ELP3 PE=1 SV=2	ELP3	16.1603	3.1874e-08	Up	10	4	17	4	4	62.2	5.92221e+06	5528657	7.31011e+06	4.23632e+07	3.76924e+07	42665608	0.221143	0.226602	0.238494	3.74298	3.70825	3.63857
Q01970	1-phosphatidylinositol 4,5-bisphosphate phosphodiesterase beta-3 OS=Homo sapiens OX=9606 GN=PLCB3 PE=1 SV=2	PLCB3	15.9473	7.421e-06	Up	16	16	166	16	16	138.7	2.66937e+07	2.72871e+07	3.81841e+07	1.82027e+08	1.7637e+08	2.36435e+08	0.204483	0.229436	0.255562	3.29933	3.5596	4.13643
Q8NBJ4	Golgi membrane protein 1 OS=Homo sapiens OX=9606 GN=GOLM1 PE=1 SV=1	GOLM1	15.7773	0.000118582	Up	15	6	11	6	6	45.3	36509538	3.3796e+07	3.03047e+07	2.42084e+08	1.45927e+08	272239744	0.258465	0.262613	0.187443	4.05509	2.72181	4.40161
Q8WYL5	Protein phosphatase Slingshot homolog 1 OS=Homo sapiens OX=9606 GN=SSH1 PE=1 SV=2	SSH1	15.7513	1.62664e-05	Up	10	6	19	6	6	115.4	2.34884e+06	3.03255e+06	3.05961e+06	1.84517e+07	1.52932e+07	2.08342e+07	0.213823	0.303015	0.243351	3.97446	3.66799	4.33154
Q96PE2	Rho guanine nucleotide exchange factor 17 OS=Homo sapiens OX=9606 GN=ARHGEF17 PE=1 SV=1	ARHGEF17	15.6935	1.11645e-06	Up	11	14	53	14	14	221.5	1.41125e+07	1.09841e+07	1.38754e+07	8.16184e+07	7.96946e+07	8.66282e+07	0.275814	0.235632	0.236931	3.77435	4.10365	3.86668
O75251	NADH dehydrogenase [ubiquinone] iron-sulfur protein 7, mitochondrial OS=Homo sapiens OX=9606 GN=NDUFS7 PE=1 SV=3	NDUFS7	15.522	3.21413e-07	Up	9	3	41	3	3	23.5	2.0754e+07	1.85605e+07	21674585	1.35028e+08	1.10768e+08	1.40542e+08	0.248208	0.243647	0.22648	3.82101	3.49025	3.83871
Q9NP80	Calcium-independent phospholipase A2-gamma OS=Homo sapiens OX=9606 GN=PNPLA8 PE=1 SV=1	PNPLA8	15.3542	8.17946e-07	Up	4	3	22	3	3	88.4	4.042e+06	3.29116e+06	4.31902e+06	2.65855e+07	2.07203e+07	2.53838e+07	0.265009	0.236847	0.247408	4.12429	3.57921	3.80089
L0R819	ASNSD1 upstream open reading frame protein OS=Homo sapiens OX=9606 GN=ASDURF PE=1 SV=1	ASDURF	15.2501	0.00976874	Up	34	2	2	2	2	11.2	163066	159804		1.19318e+06	887581		0.171964	0.184976		2.97728	2.46609
Q9ULH1	Arf-GAP with SH3 domain, ANK repeat and PH domain-containing protein 1 OS=Homo sapiens OX=9606 GN=ASAP1 PE=1 SV=4	ASAP1	15.0941	0.000728052	Up	15	13	62	13	13	125.4	3.63638e+07	1.43593e+07	4.24229e+07	1.56095e+08	1.84408e+08	215007208	0.300648	0.13031	0.306447	3.05365	4.01696	4.05983
O75348	V-type proton ATPase subunit G 1 OS=Homo sapiens OX=9606 GN=ATP6V1G1 PE=1 SV=3	ATP6V1G1	14.991	7.87275e-06	Up	39	4	48	4	4	13.7	4.16764e+07	3.46987e+07	4.63782e+07	2.16465e+08	2.26654e+08	3.03796e+08	0.222286	0.203138	0.216123	2.73181	3.18503	3.70058
P40855	Peroxisomal biogenesis factor 19 OS=Homo sapiens OX=9606 GN=PEX19 PE=1 SV=1	PEX19	14.9682	9.4129e-06	Up	17	3	8	3	3	32.8	1.47305e+07	9.77858e+06	1.55983e+07	8.41038e+07	7.45091e+07	83117736	0.283163	0.206325	0.261976	3.82539	3.7736	3.64904
P28290	Protein ITPRID2 OS=Homo sapiens OX=9606 GN=ITPRID2 PE=1 SV=3	ITPRID2	14.9196	5.03782e-07	Up	23	23	86	23	23	138.3	7.91315e+07	8.10468e+07	9.71739e+07	4.99559e+08	4.95425e+08	5.63627e+08	0.236451	0.265818	0.253692	3.53199	3.9003	3.84635
Q8TD43	Transient receptor potential cation channel subfamily M member 4 OS=Homo sapiens OX=9606 GN=TRPM4 PE=1 SV=1	TRPM4	14.8856	3.33306e-08	Up	11	10	65	10	10	134.2	9.81844e+06	9.6394e+06	1.19514e+07	6.42066e+07	5.82831e+07	67258190	0.240396	0.259054	0.255664	3.71967	3.75971	3.76092
Q14137	Ribosome biogenesis protein BOP1 OS=Homo sapiens OX=9606 GN=BOP1 PE=1 SV=2	BOP1	14.7958	1.7116e-07	Up	23	11	68	11	11	83.6	3.84223e+07	3.66769e+07	4.48418e+07	2.32877e+08	2.33764e+08	2.52598e+08	0.270547	0.28347	0.275871	3.87995	4.33675	4.06212
Q86SF2	N-acetylgalactosaminyltransferase 7 OS=Homo sapiens OX=9606 GN=GALNT7 PE=1 SV=1	GALNT7	14.668	2.199e-05	Up	19	10	50	10	10	75.3	6.73049e+07	5.94564e+07	9.68417e+07	3.97714e+08	4.72241e+08	437997139	0.230757	0.22375	0.290092	3.22642	4.26579	3.42961
Q7RTS9	Dymeclin OS=Homo sapiens OX=9606 GN=DYM PE=1 SV=1	DYM	14.6252	8.27896e-07	Up	4	3	13	3	3	75.9	7.80614e+06	7.71211e+06	9.22486e+06	4.60347e+07	4.84644e+07	5.22072e+07	0.264744	0.287091	0.273347	3.69417	4.33053	4.04376
Q10588	ADP-ribosyl cyclase/cyclic ADP-ribose hydrolase 2 OS=Homo sapiens OX=9606 GN=BST1 PE=1 SV=2	BST1	14.563	0.000335089	Up	39	8	78	8	8	35.7	3.43369e+06	6.80451e+06	7.34971e+06	3.41054e+07	3.19547e+07	3.82692e+07	0.122363	0.266159	0.228836	2.87576	3.0002	3.1146
P24386	Rab proteins geranylgeranyltransferase component A 1 OS=Homo sapiens OX=9606 GN=CHM PE=1 SV=3	CHM	14.5073	2.48368e-06	Up	4	2	9	2	2	73.4	1.20356e+06	1.0193e+06	1.47628e+06	6.92788e+06	7.3629e+06	7.27377e+06	0.239868	0.222978	0.257063	3.26698	3.86618	3.31078
Q6NUP7	Serine/threonine-protein phosphatase 4 regulatory subunit 4 OS=Homo sapiens OX=9606 GN=PPP4R4 PE=1 SV=1	PPP4R4	14.4853	1.54389e-05	Up	1	2	907	2	2	99.4	1.12006e+08	1.2672e+08	1.66001e+08	7.19777e+08	7.05903e+08	9.52434e+08	0.211918	0.263165	0.274412	3.2223	3.51884	4.11554
Q14669	E3 ubiquitin-protein ligase TRIP12 OS=Homo sapiens OX=9606 GN=TRIP12 PE=1 SV=1	TRIP12	14.4523	8.71952e-07	Up	7	10	47	10	10	220.3	1.41812e+07	1.38089e+07	1.83987e+07	8.73153e+07	8.16332e+07	1.02743e+08	0.248541	0.265643	0.281732	3.62089	3.76945	4.11247
P30511	HLA class I histocompatibility antigen, alpha chain F OS=Homo sapiens OX=9606 GN=HLA-F PE=1 SV=3	HLA-F	14.429	0.000625646	Up	21	5	8	5	5	39	7.92822e+06	3.61539e+06	4.05173e+06	3.37311e+07	2.18357e+07	3.73896e+07	0.39381	0.197116	0.17584	3.96444	2.85763	4.24158
P54920	Alpha-soluble NSF attachment protein OS=Homo sapiens OX=9606 GN=NAPA PE=1 SV=3	NAPA	14.38	2.75867e-07	Up	66	17	210	17	17	33.2	8.78234e+07	7.71529e+07	1.09302e+08	5.26142e+08	4.91482e+08	5.75393e+08	0.228155	0.220002	0.248091	3.23417	3.36399	3.41389
Q13228	Methanethiol oxidase OS=Homo sapiens OX=9606 GN=SELENBP1 PE=1 SV=2	SELENBP1	14.3592	1.81992e-05	Up	53	20	126	20	20	52.4	2.982e+07	3.36406e+07	3.74928e+07	1.6588e+08	1.96736e+08	2.26786e+08	0.198998	0.246411	0.218602	2.61924	3.45902	3.45638
P55290	Cadherin-13 OS=Homo sapiens OX=9606 GN=CDH13 PE=1 SV=1	CDH13	14.2545	0.000400297	Up	11	7	46	7	7	78.2	2.51653e+06	1.06988e+06	2.69909e+06	1.23503e+07	1.16585e+07	1.15101e+07	0.249367	0.116366	0.233678	2.8957	3.04374	2.60484
Q86TV6	Tetratricopeptide repeat protein 7B OS=Homo sapiens OX=9606 GN=TTC7B PE=1 SV=3	TTC7B	14.1503	5.95156e-05	Up	3	3	9	3	3	94.1	236815	313696	240073	1.56348e+06	1.47474e+06	1.5791e+06	0.15442	0.224522	0.136774	2.41229	2.5336	2.35164
O43772	Mitochondrial carnitine/acylcarnitine carrier protein OS=Homo sapiens OX=9606 GN=SLC25A20 PE=1 SV=1	SLC25A20	14.0708	6.6979e-05	Up	33	10	95	10	10	32.9	1.73179e+08	1.76869e+08	1.3362e+08	9.92235e+08	849635663	9.74165e+08	0.275736	0.309104	0.18588	3.73811	3.56416	3.54237
Q7L8L6	FAST kinase domain-containing protein 5, mitochondrial OS=Homo sapiens OX=9606 GN=FASTKD5 PE=1 SV=1	FASTKD5	14.015	8.19239e-07	Up	4	2	3	2	2	86.5	1.35589e+06	1.21404e+06	1.77455e+06	8577218	7.57434e+06	8.38823e+06	0.251049	0.246729	0.287069	3.75768	3.69492	3.54705
Q9UKZ1	CCR4-NOT transcription complex subunit 11 OS=Homo sapiens OX=9606 GN=CNOT11 PE=1 SV=1	CNOT11	13.9223	0.00180949	Up	11	3	15	3	3	55.2	3.65042e+06	2.90648e+06	1.31743e+06	1.81478e+07	1.30082e+07	1.49092e+07	0.370148	0.323486	0.116715	4.35409	3.47519	3.45265
Q8IZQ1	WD repeat and FYVE domain-containing protein 3 OS=Homo sapiens OX=9606 GN=WDFY3 PE=1 SV=2	WDFY3	13.8898	3.32484e-07	Up	1	2	8	2	2	395	278789	225627	312658	1.55224e+06	1.36977e+06	1.67473e+06	0.271898	0.241534	0.266418	3.58203	3.51971	3.73026
Q96CD0	F-box/LRR-repeat protein 8 OS=Homo sapiens OX=9606 GN=FBXL8 PE=1 SV=1	FBXL8	13.87	8.992e-06	Up	30	7	25	7	7	40.5	1.58098e+07	1.61667e+07	1.84766e+07	9.01983e+07	7.81733e+07	1.1819e+08	0.245681	0.275754	0.250861	3.31653	3.2006	4.19459
O15228	Dihydroxyacetone phosphate acyltransferase OS=Homo sapiens OX=9606 GN=GNPAT PE=1 SV=1	GNPAT	13.8358	0.000123559	Up	27	14	97	14	14	77.1	3.57908e+07	3.14021e+07	3.11783e+07	1.84365e+08	1.27742e+08	2.5229e+08	0.342196	0.329547	0.260448	4.17082	3.21784	5.50895
Q76M96	Coiled-coil domain-containing protein 80 OS=Homo sapiens OX=9606 GN=CCDC80 PE=1 SV=1	CCDC80	13.8334	0.000137975	Up	4	3	10	3	3	108.1	659150	1.01586e+06	713292	4.72872e+06	4.07149e+06	4.92514e+06	0.21552	0.364581	0.203768	3.65838	3.5074	3.67779
Q96AC1	Fermitin family homolog 2 OS=Homo sapiens OX=9606 GN=FERMT2 PE=1 SV=1	FERMT2	13.7499	4.41373e-06	Up	61	35	503	35	35	77.8	1.84143e+08	1.68431e+08	2.39078e+08	1.02094e+09	1.13571e+09	1.11136e+09	0.240717	0.241673	0.273058	3.15785	3.91151	3.31795
A9UHW6	MIF4G domain-containing protein OS=Homo sapiens OX=9606 GN=MIF4GD PE=1 SV=1	MIF4GD	13.6923	1.38842e-05	Up	18	2	8	2	2	25.4	1.21742e+06	1467229	1.37454e+06	7.21963e+06	7343318	8202817	0.240094	0.317611	0.236845	3.36897	3.81559	3.69462
Q8WX92	Negative elongation factor B OS=Homo sapiens OX=9606 GN=NELFB PE=1 SV=1	NELFB	13.6417	1.06663e-06	Up	10	6	22	6	6	65.7	3.95864e+07	4.12074e+07	4.64328e+07	2.24529e+08	2.23473e+08	2.58521e+08	0.251884	0.287796	0.258133	3.38039	3.74633	3.75678
Q8WXF7	Atlastin-1 OS=Homo sapiens OX=9606 GN=ATL1 PE=1 SV=1	ATL1	13.6022	2.63626e-06	Up	8	4	46	3	3	63.5	3500369	3.78659e+06	4.60006e+06	2.0971e+07	1.97233e+07	2.50591e+07	0.268834	0.319209	0.308673	3.81093	3.99096	4.39543
P29992	Guanine nucleotide-binding protein subunit alpha-11 OS=Homo sapiens OX=9606 GN=GNA11 PE=1 SV=2	GNA11	13.5926	1.83583e-05	Up	40	12	168	5	12	42.1	1.25115e+08	1.33427e+08	1.18138e+08	7.64917e+08	6.52825e+08	6.84997e+08	0.239717	0.2806	0.197763	3.46772	3.29544	2.99738
Q9Y3P9	Rab GTPase-activating protein 1 OS=Homo sapiens OX=9606 GN=RABGAP1 PE=1 SV=3	RABGAP1	13.5148	1.01718e-09	Up	15	12	62	12	12	121.7	1.67486e+07	1.53154e+07	1.87261e+07	9.5731e+07	8.47833e+07	9.842e+07	0.262289	0.26326	0.25622	3.54728	3.49816	3.52006
Q8N3D4	EH domain-binding protein 1-like protein 1 OS=Homo sapiens OX=9606 GN=EHBP1L1 PE=1 SV=2	EHBP1L1	13.4399	2.78265e-06	Up	6	7	19	7	7	161.8	1.26742e+07	1.33047e+07	1.47094e+07	8.37189e+07	6.36842e+07	75950453	0.256137	0.295129	0.259724	4.00329	3.39087	3.50548
Q8NBU5	Outer mitochondrial transmembrane helix translocase OS=Homo sapiens OX=9606 GN=ATAD1 PE=1 SV=1	ATAD1	13.3866	0.000101097	Up	29	9	54	9	9	40.7	51502683	4.98809e+07	4.15362e+07	3.02733e+08	2.59782e+08	2.22183e+08	0.280307	0.297985	0.197513	3.89858	3.72513	2.76173
Q9H3F6	BTB/POZ domain-containing adapter for CUL3-mediated RhoA degradation protein 3 OS=Homo sapiens OX=9606 GN=KCTD10 PE=1 SV=1	KCTD10	13.3715	1.19374e-05	Up	7	2	4	2	2	35.4	6.32321e+06	4.65267e+06	7.4514e+06	30010408	3.09774e+07	3.82106e+07	0.27747	0.224097	0.28568	3.11595	3.58138	3.82937
P39060	Collagen alpha-1(XVIII) chain OS=Homo sapiens OX=9606 GN=COL18A1 PE=1 SV=5	COL18A1	13.2579	8.93952e-07	Up	6	9	77	9	9	178.1	4.72419e+06	4.29274e+06	6.00575e+06	2.61442e+07	2.39814e+07	3.04861e+07	0.292001	0.291238	0.324332	3.82362	3.90536	4.30353
Q15904	V-type proton ATPase subunit S1 OS=Homo sapiens OX=9606 GN=ATP6AP1 PE=1 SV=2	ATP6AP1	13.1361	6.23259e-07	Up	11	5	54	5	5	52	1.00512e+07	8.6136e+06	1.21339e+07	5.92413e+07	4.91653e+07	5.50759e+07	0.251307	0.236389	0.265065	3.50471	3.23872	3.14495
O43854	EGF-like repeat and discoidin I-like domain-containing protein 3 OS=Homo sapiens OX=9606 GN=EDIL3 PE=1 SV=1	EDIL3	13.1331	1.05181e-08	Up	58	29	544	29	29	53.7	8.1866e+07	7.66697e+07	9.44805e+07	4.61197e+08	4.22743e+08	4.63885e+08	0.233854	0.240393	0.235803	3.11723	3.18161	3.02634
Q14966	Zinc finger protein 638 OS=Homo sapiens OX=9606 GN=ZNF638 PE=1 SV=2	ZNF638	13.1029	1.72273e-06	Up	5	7	256	7	7	220.5	2.02478e+08	1.80935e+08	2.70342e+08	1.14483e+09	1.03474e+09	1276412957	0.244657	0.239971	0.285403	3.27311	3.29411	3.52239
P98196	Phospholipid-transporting ATPase IH OS=Homo sapiens OX=9606 GN=ATP11A PE=1 SV=3	ATP11A	13.1006	2.85355e-05	Up	2	3	20	2	2	129.7	446416	404505	426558	2.81205e+06	1.98374e+06	2.04352e+06	0.268783	0.267327	0.224391	4.00614	3.14685	2.80999
O95980	Reversion-inducing cysteine-rich protein with Kazal motifs OS=Homo sapiens OX=9606 GN=RECK PE=1 SV=1	RECK	12.9496	9.00931e-05	Up	21	17	86	17	17	106.4	3.55233e+06	2.05522e+06	2.65355e+06	1.68012e+07	1.27967e+07	1.39098e+07	0.283113	0.179788	0.184773	3.16831	2.68703	2.53181
P19440	Glutathione hydrolase 1 proenzyme OS=Homo sapiens OX=9606 GN=GGT1 PE=1 SV=2	GGT1	12.8793	1.26653e-05	Up	16	8	31	8	8	61.4	1.53423e+06	1.39918e+06	1.36934e+06	7.02784e+06	7.00341e+06	8.69932e+06	0.177055	0.177235	0.138069	1.91903	2.1294	2.29282
Q96T60	Bifunctional polynucleotide phosphatase/kinase OS=Homo sapiens OX=9606 GN=PNKP PE=1 SV=1	PNKP	12.8221	5.23033e-06	Up	7	3	9	3	3	57	1.51054e+06	1.09978e+06	1.74017e+06	7.94324e+06	6.79966e+06	7.72013e+06	0.318153	0.254252	0.320228	3.9586	3.77328	3.71358
Q9H939	Proline-serine-threonine phosphatase-interacting protein 2 OS=Homo sapiens OX=9606 GN=PSTPIP2 PE=1 SV=4	PSTPIP2	12.7454	2.4226e-07	Up	9	3	12	3	3	38.8	2.41482e+06	2.13855e+06	2.66441e+06	1.29364e+07	1.19923e+07	1.23303e+07	0.309071	0.300434	0.297948	3.91767	4.04391	3.60421
Q96BR5	Cytochrome c oxidase assembly factor 7 OS=Homo sapiens OX=9606 GN=COA7 PE=1 SV=2	COA7	12.5689	1.14757e-05	Up	16	3	15	3	3	25.7	3.69818e+06	3.73887e+06	4.40377e+06	2.31994e+07	1.54723e+07	2.22287e+07	0.270133	0.299769	0.281047	4.00965	2.97763	3.70824
Q9NVT9	Armadillo repeat-containing protein 1 OS=Homo sapiens OX=9606 GN=ARMC1 PE=1 SV=1	ARMC1	12.5128	5.29249e-07	Up	40	6	36	6	6	31.3	3.46673e+08	3.46779e+08	3.99005e+08	2.00801e+09	1.68698e+09	1.8683e+09	0.285823	0.313823	0.287422	3.91727	3.6645	3.51794
P36021	Monocarboxylate transporter 8 OS=Homo sapiens OX=9606 GN=SLC16A2 PE=1 SV=2	SLC16A2	12.4469	7.7286e-06	Up	5	2	13	2	2	59.5	606698	644644	610358	3.10456e+06	2.90608e+06	3.50017e+06	0.286712	0.334387	0.252013	3.47148	3.61833	3.7777
Q9UIJ7	GTP:AMP phosphotransferase AK3, mitochondrial OS=Homo sapiens OX=9606 GN=AK3 PE=1 SV=4	AK3	12.4327	0.000215048	Up	56	12	134	12	12	25.6	5.61041e+07	3.53176e+07	3.26569e+07	2.15922e+08	1.80264e+08	2.40118e+08	0.354854	0.24519	0.180466	3.23141	3.00394	3.46853
Q16512	Serine/threonine-protein kinase N1 OS=Homo sapiens OX=9606 GN=PKN1 PE=1 SV=2	PKN1	12.3317	5.66231e-06	Up	9	7	23	5	5	103.9	1.67114e+07	1.37557e+07	1.50801e+07	78090968	74794960	75713176	0.310979	0.280968	0.245181	3.43843	3.66706	3.21777
Q9UPT5	Exocyst complex component 7 OS=Homo sapiens OX=9606 GN=EXOC7 PE=1 SV=3	EXOC7	12.2626	8.051e-05	Up	33	19	81	19	19	83.3	4.46786e+07	4.87122e+07	3.98439e+07	2.14352e+08	2.43883e+08	2.10469e+08	0.238476	0.28539	0.185811	2.70716	3.42968	2.56566
Q08431	Lactadherin OS=Homo sapiens OX=9606 GN=MFGE8 PE=1 SV=3	MFGE8	12.0916	1.53265e-07	Up	71	23	471	23	23	43.1	1.54412e+08	1.42748e+08	1.7064e+08	7.41785e+08	7.30277e+08	8.25436e+08	0.256438	0.260211	0.247597	2.91487	3.19533	3.13076
Q7Z2K6	Endoplasmic reticulum metallopeptidase 1 OS=Homo sapiens OX=9606 GN=ERMP1 PE=1 SV=2	ERMP1	11.9906	3.91888e-07	Up	12	6	12	6	6	100.2	2.07894e+06	1.71942e+06	2.20185e+06	9898907	8.54776e+06	10806990	0.324945	0.294989	0.300691	3.66097	3.52004	3.85778
Q9Y3A3	MOB-like protein phocein OS=Homo sapiens OX=9606 GN=MOB4 PE=1 SV=1	MOB4	11.9026	2.93233e-07	Up	33	5	35	5	5	26	6.36731e+06	5.49132e+06	7.24153e+06	32634126	28863714	30463510	0.313804	0.297053	0.311815	3.80553	3.74785	3.42884
P01033	Metalloproteinase inhibitor 1 OS=Homo sapiens OX=9606 GN=TIMP1 PE=1 SV=1	TIMP1	11.8812	6.56009e-06	Up	42	6	89	6	6	23.2	2.97563e+07	2.52636e+07	33890590	1.24656e+08	1.43831e+08	1.5803e+08	0.270618	0.252191	0.269291	2.68245	3.44633	3.28234
Q13557	Calcium/calmodulin-dependent protein kinase type II subunit delta OS=Homo sapiens OX=9606 GN=CAMK2D PE=1 SV=3	CAMK2D	11.8697	7.89409e-07	Up	27	11	116	7	11	56.3	1.15314e+08	1.20595e+08	1.35481e+08	6.09319e+08	570792124	6.1273e+08	0.272468	0.312764	0.279689	3.40657	3.55334	3.30648
Q8NEZ2	Vacuolar protein sorting-associated protein 37A OS=Homo sapiens OX=9606 GN=VPS37A PE=1 SV=1	VPS37A	11.8616	6.1345e-05	Up	21	6	31	6	6	44.3	7.8508e+06	5.01687e+06	9.72327e+06	3.91795e+07	3.32518e+07	3.45459e+07	0.321953	0.225822	0.348382	3.8017	3.5927	3.23549
Q2KJY2	Kinesin-like protein KIF26B OS=Homo sapiens OX=9606 GN=KIF26B PE=1 SV=1	KIF26B	11.8544	1.68675e-07	Up	1	2	3	2	2	223.7	1.96101e+06	1.68177e+06	2.30814e+06	9609233	9054587	9826601	0.279215	0.262834	0.287136	3.23734	3.39669	3.19542
Q5VT79	Annexin A8-like protein 1 OS=Homo sapiens OX=9606 GN=ANXA8L1 PE=2 SV=2	ANXA8L1	11.6528	0.000337823	Up	14	4	22	4	4	36.9	741766	943404	1.7861e+06	5.03196e+06	5.21207e+06	5.8044e+06	0.213257	0.297708	0.44865	3.42307	3.94798	3.81118
P49006	MARCKS-related protein OS=Homo sapiens OX=9606 GN=MARCKSL1 PE=1 SV=2	MARCKSL1	11.6116	0.000189024	Up	14	2	12	2	2	19.5	468730	771187	817611	3764682	2.7834e+06	3207473	0.194229	0.350757	0.296007	3.69113	3.03874	3.03542
Q04771	Activin receptor type-1 OS=Homo sapiens OX=9606 GN=ACVR1 PE=1 SV=1	ACVR1	11.5801	0.000126257	Up	6	3	15	3	3	57.1	1.34664e+06	1.9824e+06	2.6017e+06	9.3865e+06	8.81886e+06	9.48859e+06	0.197422	0.319002	0.333249	3.25604	3.40632	3.17696
Q9UKG9	Peroxisomal carnitine O-octanoyltransferase OS=Homo sapiens OX=9606 GN=CROT PE=1 SV=2	CROT	11.5147	0.000129064	Up	10	5	12	5	5	70.1	994038	886023	954337	3599713	3.59853e+06	6.23826e+06	0.27916	0.273118	0.234162	2.39198	2.66258	4.00109
Q9Y316	Protein MEMO1 OS=Homo sapiens OX=9606 GN=MEMO1 PE=1 SV=1	MEMO1	11.3522	8.62355e-06	Up	50	9	41	9	9	33.7	2.09384e+07	2.10504e+07	2.33092e+07	9.37312e+07	1.06751e+08	9.98994e+07	0.275431	0.303939	0.267894	2.91739	3.69972	3.00122
P29466	Caspase-1 OS=Homo sapiens OX=9606 GN=CASP1 PE=1 SV=1	CASP1	11.3331	0.000244006	Up	20	6	13	6	6	45.1	5.72855e+06	3.10263e+06	3.43892e+06	19472464	16602426	20908666	0.390146	0.231936	0.20463	3.13793	2.97907	3.25217
P78368	Casein kinase I isoform gamma-2 OS=Homo sapiens OX=9606 GN=CSNK1G2 PE=1 SV=1	CSNK1G2	11.2237	0.00019494	Up	8	2	13	2	2	47.4	375134	397427	663468	1.66124e+06	2.15106e+06	2.6335e+06	0.255178	0.296736	0.394315	2.67381	3.85512	4.09125
P04114	Apolipoprotein B-100 OS=Homo sapiens OX=9606 GN=APOB PE=1 SV=2	APOB	11.2216	1.50175e-05	Up	1	5	32	4	4	515.3	1950616	2.26592e+06	2.14904e+06	1.06487e+07	9.00426e+06	9.61064e+06	0.275201	0.350897	0.264903	3.5548	3.34698	3.09667
Q9Y619	Mitochondrial ornithine transporter 1 OS=Homo sapiens OX=9606 GN=SLC25A15 PE=1 SV=1	SLC25A15	10.9606	0.000208892	Up	16	4	30	4	4	32.7	2.89298e+06	3.4928e+06	5.92834e+06	1.95691e+07	1.39098e+07	2.08204e+07	0.221451	0.293469	0.396489	3.54442	2.80531	3.63987
P17948	Vascular endothelial growth factor receptor 1 OS=Homo sapiens OX=9606 GN=FLT1 PE=1 SV=2	FLT1	10.959	1.53217e-05	Up	12	13	73	12	12	150.7	5.77083e+06	6.68535e+06	6.09768e+06	2.82966e+07	2.54584e+07	2.9782e+07	0.26874	0.341723	0.248098	3.11795	3.12359	3.16747
P25445	Tumor necrosis factor receptor superfamily member 6 OS=Homo sapiens OX=9606 GN=FAS PE=1 SV=1	FAS	10.9374	3.60624e-07	Up	37	10	73	10	10	37.7	7.02303e+06	6.15331e+06	8.0736e+06	3.27637e+07	2.68936e+07	3.47911e+07	0.313149	0.301156	0.314528	3.45669	3.15939	3.5429
Q9Y3A2	Probable U3 small nucleolar RNA-associated protein 11 OS=Homo sapiens OX=9606 GN=UTP11 PE=1 SV=2	UTP11	10.8772	2.242e-05	Up	15	4	17	4	4	30.4	1.36624e+06	1.55185e+06	2.20658e+06	7.23027e+06	7253832	7942487	0.285755	0.356264	0.403229	3.57818	3.99725	3.79392
Q9UPU5	Ubiquitin carboxyl-terminal hydrolase 24 OS=Homo sapiens OX=9606 GN=USP24 PE=1 SV=3	USP24	10.7327	9.91638e-07	Up	4	8	42	8	8	294.2	3.83585e+06	3.05203e+06	4.25551e+06	1.64101e+07	1.54771e+07	1.63858e+07	0.333548	0.2913	0.323305	3.37637	3.54579	3.25409
P19022	Cadherin-2 OS=Homo sapiens OX=9606 GN=CDH2 PE=1 SV=4	CDH2	10.6906	5.31149e-08	Up	28	16	105	16	16	99.7	3.0373e+07	2.92684e+07	3.54293e+07	1.41826e+08	1.29302e+08	1.41351e+08	0.338286	0.35781	0.344766	3.73762	3.79427	3.59552
Q8NFH5	Nucleoporin NUP35 OS=Homo sapiens OX=9606 GN=NUP35 PE=1 SV=1	NUP35	10.6163	1.18713e-06	Up	18	4	36	4	4	34.8	6.94159e+06	5.51546e+06	7.36908e+06	27965752	25498782	31948136	0.348333	0.30379	0.323083	3.3205	3.37119	3.66139
P13533	Myosin-6 OS=Homo sapiens OX=9606 GN=MYH6 PE=1 SV=5	MYH6	10.5234	0.000266313	Up	2	4	40	2	2	223.6	1.29525e+06	1.84458e+06	2.59102e+06	7.83356e+06	6.41064e+06	10217216	0.209308	0.327178	0.365819	2.99523	2.72935	3.77076
Q9UBV8	Peflin OS=Homo sapiens OX=9606 GN=PEF1 PE=1 SV=1	PEF1	10.4776	2.43254e-06	Up	20	6	58	6	6	30.4	16103436	1.53604e+07	2.05382e+07	8.03119e+07	6.10334e+07	7.9935e+07	0.317016	0.33191	0.353256	3.74097	3.16562	3.59389
O75695	Protein XRP2 OS=Homo sapiens OX=9606 GN=RP2 PE=1 SV=4	RP2	10.3862	5.23449e-07	Up	22	9	133	9	9	39.6	1.59695e+07	1.42101e+07	1.73143e+07	6.33721e+07	6.32561e+07	7.37231e+07	0.336167	0.328334	0.318445	3.15647	3.50827	3.54431
Q8IWB9	Testis-expressed protein 2 OS=Homo sapiens OX=9606 GN=TEX2 PE=1 SV=2	TEX2	10.3498	0.000569193	Up	4	4	9	4	4	125.2	1.24971e+06	587617	1.06925e+06	5.01766e+06	2.80715e+06	4.38304e+06	0.471694	0.243446	0.35261	4.4812	2.79155	3.77827
P35249	Replication factor C subunit 4 OS=Homo sapiens OX=9606 GN=RFC4 PE=1 SV=2	RFC4	10.3249	0.000253163	Up	23	6	9	6	6	39.7	4.29621e+06	3.96292e+06	5.99524e+06	2.25892e+07	21731670	14294627	0.295907	0.299599	0.360779	3.68138	3.94358	2.24857
Q7Z460	CLIP-associating protein 1 OS=Homo sapiens OX=9606 GN=CLASP1 PE=1 SV=1	CLASP1	10.1932	4.5824e-06	Up	11	13	48	12	13	169.3	2.99561e+07	2.8453e+07	37359585	1.18219e+08	1.26441e+08	1.50429e+08	0.333819	0.348024	0.363741	3.11711	3.71229	3.82845
P63279	SUMO-conjugating enzyme UBC9 OS=Homo sapiens OX=9606 GN=UBE2I PE=1 SV=1	UBE2I	10.0737	5.20006e-08	Up	56	8	65	8	8	18	1.03114e+08	8.97922e+07	1.14128e+08	4.3219e+08	3.70947e+08	4.53686e+08	0.309328	0.295661	0.299126	3.06771	2.93183	3.10827
Q9NV96	Cell cycle control protein 50A OS=Homo sapiens OX=9606 GN=TMEM30A PE=1 SV=1	TMEM30A	9.97213	0.000124039	Up	22	7	59	7	7	40.7	1.14671e+07	9.68201e+06	7.99851e+06	4.23128e+07	3.78424e+07	3.94932e+07	0.375531	0.348027	0.228858	3.27872	3.26511	2.95378
Q9NZW5	Protein PALS2 OS=Homo sapiens OX=9606 GN=PALS2 PE=1 SV=2	PALS2	9.93013	1.1573e-07	Up	31	16	153	15	16	61.1	1.76575e+07	16764000	1.99006e+07	7.78911e+07	6.52628e+07	7.63944e+07	0.305704	0.318571	0.301027	3.19082	2.97691	3.02065
O00468	Agrin OS=Homo sapiens OX=9606 GN=AGRN PE=1 SV=6	AGRN	9.90333	2.02129e-06	Up	28	38	313	38	38	217.2	2.08401e+07	1.92441e+07	2.80137e+07	9.06455e+07	8.16767e+07	9.99601e+07	0.363741	0.368675	0.427195	3.7435	3.75593	3.98458
Q96RQ3	Methylcrotonoyl-CoA carboxylase subunit alpha, mitochondrial OS=Homo sapiens OX=9606 GN=MCCC1 PE=1 SV=3	MCCC1	9.8924	2.17929e-05	Up	26	11	49	11	11	80.4	1.02599e+07	7.05263e+06	1.02347e+07	3.40211e+07	3.31675e+07	4.31939e+07	0.399176	0.301181	0.347904	3.13192	3.39986	3.83803
Q75QN2	Integrator complex subunit 8 OS=Homo sapiens OX=9606 GN=INTS8 PE=1 SV=1	INTS8	9.81229	2.27084e-05	Up	5	4	7	4	4	113	2.01489e+06	1.52538e+06	2.15745e+06	8500180	7319968	6.69789e+06	0.448079	0.372337	0.419188	4.47273	4.28884	3.40178
P62341	Thioredoxin reductase-like selenoprotein T OS=Homo sapiens OX=9606 GN=SELENOT PE=1 SV=2	SELENOT	9.66064	6.49395e-07	Up	29	4	51	4	4	22.3	8.08841e+06	6.72653e+06	8.31832e+06	3.23508e+07	2.67468e+07	3.18156e+07	0.390242	0.35622	0.350648	3.69315	3.39993	3.50571
Q6UXN9	WD repeat-containing protein 82 OS=Homo sapiens OX=9606 GN=WDR82 PE=1 SV=1	WDR82	9.63343	3.53032e-07	Up	16	5	29	5	5	35.1	9.54053e+06	8.92169e+06	1.13397e+07	38822712	34042104	4.38468e+07	0.382428	0.392537	0.397139	3.68217	3.59519	4.01402
Q9P265	Disco-interacting protein 2 homolog B OS=Homo sapiens OX=9606 GN=DIP2B PE=1 SV=3	DIP2B	9.63088	1.76598e-06	Up	8	9	52	8	9	171.4	1.50842e+07	1.3727e+07	1.66611e+07	5.80206e+07	6.0182e+07	5.89951e+07	0.332656	0.332281	0.321026	3.02758	3.49676	2.97134
P80217	Interferon-induced 35 kDa protein OS=Homo sapiens OX=9606 GN=IFI35 PE=1 SV=5	IFI35	9.61558	6.19244e-07	Up	38	8	85	8	8	31.5	2.421e+07	2.34263e+07	2.69385e+07	9.54122e+07	9.48917e+07	1.00966e+08	0.330783	0.351324	0.321579	3.08456	3.41589	3.15057
Q9UH99	SUN domain-containing protein 2 OS=Homo sapiens OX=9606 GN=SUN2 PE=1 SV=3	SUN2	9.59324	4.35637e-07	Up	43	18	103	18	18	80.3	6.39988e+07	6.21434e+07	7.20912e+07	2.52472e+08	2.49514e+08	2.70504e+08	0.382159	0.407308	0.376114	3.56719	3.92549	3.68902
Q9P2N5	RNA-binding protein 27 OS=Homo sapiens OX=9606 GN=RBM27 PE=1 SV=2	RBM27	9.58278	1.31411e-05	Up	2	2	2	2	2	118.6	516176	399033	675170	2.11395e+06	1815732	2.19397e+06	0.367514	0.311847	0.420006	3.56132	3.40609	3.56758
Q8IWT6	Volume-regulated anion channel subunit LRRC8A OS=Homo sapiens OX=9606 GN=LRRC8A PE=1 SV=1	LRRC8A	9.54432	2.03e-06	Up	16	11	80	11	11	94.1	4.98701e+07	4.47057e+07	5.2734e+07	1.7948e+08	1.90754e+08	2.00019e+08	0.345578	0.340036	0.319273	2.94282	3.48264	3.16551
P48449	Lanosterol synthase OS=Homo sapiens OX=9606 GN=LSS PE=1 SV=1	LSS	9.52151	6.4921e-08	Up	36	22	220	22	22	83.3	8.24688e+07	7.80988e+07	9.57912e+07	3.34859e+08	3.15108e+08	3.39691e+08	0.357796	0.371916	0.363108	3.43754	3.6019	3.36585
P56945	Breast cancer anti-estrogen resistance protein 1 OS=Homo sapiens OX=9606 GN=BCAR1 PE=1 SV=2	BCAR1	9.47854	8.44916e-05	Up	10	6	14	6	6	93.3	1.22311e+07	1.71704e+07	2.04493e+07	6.4384e+07	62261610	64602206	0.268547	0.413801	0.392284	3.34484	3.60167	3.23943
Q8IUD2	ELKS/Rab6-interacting/CAST family member 1 OS=Homo sapiens OX=9606 GN=ERC1 PE=1 SV=1	ERC1	9.45649	2.74268e-06	Up	21	20	124	20	20	128	3.45562e+07	3.53159e+07	4.36023e+07	1.62154e+08	1.29182e+08	1.44305e+08	0.331096	0.371411	0.365008	3.67618	3.26105	3.15772
Q8TB37	Iron-sulfur protein NUBPL OS=Homo sapiens OX=9606 GN=NUBPL PE=1 SV=3	NUBPL	9.42708	0.00315505	Up	15	4	10	4	4	34.1	624314	207563	857417	2.26537e+06	1.8992e+06	2.07166e+06	0.490858	0.179125	0.588992	4.21436	3.93415	3.71995
Q9Y6M5	Zinc transporter 1 OS=Homo sapiens OX=9606 GN=SLC30A1 PE=1 SV=3	SLC30A1	9.39608	3.07832e-05	Up	20	8	72	8	8	55.3	6.55435e+06	5.21991e+06	7.32414e+06	2.61999e+07	1.81307e+07	2.8805e+07	0.377272	0.329795	0.368338	3.56834	2.74958	3.78668
O60271	C-Jun-amino-terminal kinase-interacting protein 4 OS=Homo sapiens OX=9606 GN=SPAG9 PE=1 SV=4	SPAG9	9.35264	5.17905e-06	Up	24	22	128	22	22	146.1	8.45527e+07	8.88872e+07	9.12663e+07	3.66321e+08	2.93961e+08	3.53703e+08	0.340652	0.393078	0.321262	3.4921	3.12033	3.25452
P78324	Tyrosine-protein phosphatase non-receptor type substrate 1 OS=Homo sapiens OX=9606 GN=SIRPA PE=1 SV=2	SIRPA	9.29611	1.00813e-07	Up	15	5	32	5	5	54.9	8.36786e+06	7.99125e+06	9.65604e+06	3.22275e+07	3.02047e+07	3.58701e+07	0.362802	0.380299	0.365779	3.30614	3.4503	3.55183
O14817	Tetraspanin-4 OS=Homo sapiens OX=9606 GN=TSPAN4 PE=1 SV=1	TSPAN4	9.28598	0.0057758	Up	23	3	29	3	3	26.1	1.07697e+06	817046	4.36265e+06	7.35799e+06	6.64284e+06	8.23694e+06	0.189112	0.157477	0.669312	3.05713	3.07323	3.30327
Q9Y625	Glypican-6 OS=Homo sapiens OX=9606 GN=GPC6 PE=1 SV=1	GPC6	9.28013	8.12076e-06	Up	22	11	117	10	11	62.7	6.322e+06	4.62202e+06	7.31204e+06	2.31831e+07	2.0432e+07	2.46734e+07	0.190471	0.152849	0.192477	1.65268	1.62186	1.69773
P98160	Basement membrane-specific heparan sulfate proteoglycan core protein OS=Homo sapiens OX=9606 GN=HSPG2 PE=1 SV=4	HSPG2	9.22613	1.96428e-06	Up	35	94	745	94	94	468.5	1.29526e+08	1.14646e+08	1.33569e+08	4.5202e+08	4.70221e+08	4.92283e+08	0.433409	0.421072	0.390491	3.57881	4.14544	3.76202
Q9H0B8	Cysteine-rich secretory protein LCCL domain-containing 2 OS=Homo sapiens OX=9606 GN=CRISPLD2 PE=2 SV=1	CRISPLD2	9.21453	4.34588e-06	Up	30	10	57	10	10	55.9	6.13602e+06	6.02776e+06	6.96713e+06	2.34893e+07	24569401	2.33316e+07	0.275263	0.296805	0.273073	2.49329	2.90391	2.39039
Q14185	Dedicator of cytokinesis protein 1 OS=Homo sapiens OX=9606 GN=DOCK1 PE=1 SV=2	DOCK1	9.21396	7.74587e-07	Up	6	8	24	7	7	215.2	1.6345e+07	1.44226e+07	2.06783e+07	64315661	5.77414e+07	69454236	0.37326	0.361516	0.412578	3.47524	3.47409	3.62235
Q13362	Serine/threonine-protein phosphatase 2A 56 kDa regulatory subunit gamma isoform OS=Homo sapiens OX=9606 GN=PPP2R5C PE=1 SV=3	PPP2R5C	9.21045	0.00262866	Up	17	8	39	3	3	61	1.0918e+06	1662468	2.01658e+06	6955627		5372186	0.27104	0.453003	0.437395	4.08573		3.04585
Q5TCZ1	SH3 and PX domain-containing protein 2A OS=Homo sapiens OX=9606 GN=SH3PXD2A PE=1 SV=1	SH3PXD2A	9.20057	1.36184e-06	Up	7	6	16	4	4	125.2	1.62681e+06	1.40385e+06	1.6e+06	5.70016e+06	5.35141e+06	6313934	0.364772	0.34551	0.313451	3.0242	3.1614	3.23332
P18124	60S ribosomal protein L7 OS=Homo sapiens OX=9606 GN=RPL7 PE=1 SV=1	RPL7	9.13966	3.8443e-06	Up	54	18	382	18	18	29.2	1.20589e+08	1.30431e+08	1.42263e+08	4.82005e+08	4.33782e+08	5.53139e+08	0.349767	0.415249	0.360519	3.30799	3.3149	3.66412
Q8NBQ5	Estradiol 17-beta-dehydrogenase 11 OS=Homo sapiens OX=9606 GN=HSD17B11 PE=1 SV=3	HSD17B11	9.13468	5.87771e-06	Up	28	7	62	7	7	32.9	6.18821e+07	6.71127e+07	7.20828e+07	2.72825e+08	2.11813e+08	2.67037e+08	0.329209	0.391893	0.335045	3.43426	2.96885	3.24447
P48651	Phosphatidylserine synthase 1 OS=Homo sapiens OX=9606 GN=PTDSS1 PE=1 SV=1	PTDSS1	9.09747	5.31659e-05	Up	16	5	29	5	5	55.5	3.29756e+06	3.84722e+06	3.44349e+06	1.24615e+07	1.37877e+07	1.31249e+07	0.331601	0.424645	0.302543	2.96507	3.65295	3.01428
Q9BY32	Inosine triphosphate pyrophosphatase OS=Homo sapiens OX=9606 GN=ITPA PE=1 SV=2	ITPA	9.03843	4.07032e-06	Up	47	7	67	7	7	21.4	3.04183e+07	3.09086e+07	3.42401e+07	1.16134e+08	1.18436e+08	116091785	0.307858	0.343362	0.302772	2.7811	3.15811	2.68338
Q7Z5G4	Golgin subfamily A member 7 OS=Homo sapiens OX=9606 GN=GOLGA7 PE=1 SV=2	GOLGA7	9.01656	0.000486898	Up	22	3	13	3	3	15.8	7.90571e+06	4.19063e+06	9.03688e+06	2.65884e+07	1.8535e+07	3.16141e+07	0.409256	0.238116	0.408731	3.25677	2.52799	3.73767
Q9BV23	Monoacylglycerol lipase ABHD6 OS=Homo sapiens OX=9606 GN=ABHD6 PE=1 SV=1	ABHD6	8.97162	0.000123657	Up	7	2	26	2	2	38.3	2.20911e+06	2.0074e+06	2.66726e+06	6.75956e+06	6.96709e+06	1.14476e+07	0.326827	0.32598	0.344771	2.36624	2.71569	3.86795
Q9P121	Neurotrimin OS=Homo sapiens OX=9606 GN=NTM PE=1 SV=1	NTM	8.95713	0.000153744	Up	12	4	22	4	4	37.9	3.3657e+06	4.11554e+06	3.46543e+06	1.13999e+07	1.22506e+07	16848543	0.302174	0.405568	0.271833	2.42172	2.89778	3.45468
O95352	Ubiquitin-like modifier-activating enzyme ATG7 OS=Homo sapiens OX=9606 GN=ATG7 PE=1 SV=1	ATG7	8.95043	1.03993e-06	Up	15	9	34	9	9	77.9	6.3259e+06	5.04531e+06	7.04716e+06	2.34826e+07	19754139	23506904	0.411399	0.36015	0.400423	3.6135	3.38474	3.49141
Q9BUL8	Programmed cell death protein 10 OS=Homo sapiens OX=9606 GN=PDCD10 PE=1 SV=1	PDCD10	8.89264	3.86058e-07	Up	47	8	43	8	8	24.7	2.54567e+07	2.24611e+07	2.67353e+07	8.9109e+07	86616790	9.38269e+07	0.381367	0.369341	0.349938	3.15866	3.41878	3.21021
P00519	Tyrosine-protein kinase ABL1 OS=Homo sapiens OX=9606 GN=ABL1 PE=1 SV=4	ABL1	8.70746	0.00011169	Up	2	2	4	2	2	122.8	1.09502e+06	695302	1.40328e+06	3.93579e+06	3.36226e+06	3.80277e+06	0.333463	0.232411	0.373367	2.83596	2.69765	2.6448
Q14692	Ribosome biogenesis protein BMS1 homolog OS=Homo sapiens OX=9606 GN=BMS1 PE=1 SV=1	BMS1	8.69101	3.38343e-07	Up	10	9	32	9	9	145.7	10141887	8.76895e+06	1.15235e+07	3.53153e+07	34731212	3.68812e+07	0.36975	0.350907	0.367061	3.04644	3.33608	3.07085
Q9P0V9	Septin-10 OS=Homo sapiens OX=9606 GN=SEPTIN10 PE=1 SV=2	SEPTIN10	8.63611	1.13253e-05	Up	36	11	70	9	9	52.6	7.41745e+06	7481261	7.28247e+06	2.51368e+07	2.47771e+07	2.8534e+07	0.395166	0.437477	0.338975	3.16866	3.47779	3.47178
Q6PKC3	Thioredoxin domain-containing protein 11 OS=Homo sapiens OX=9606 GN=TXNDC11 PE=1 SV=2	TXNDC11	8.61317	0.000118224	Up	5	3	20	3	3	110.5	1.04202e+06	1.39278e+06	1.83967e+06	5.46687e+06	4.60635e+06	4.77927e+06	0.287837	0.422291	0.443995	3.57316	3.35241	3.01508
P20073	Annexin A7 OS=Homo sapiens OX=9606 GN=ANXA7 PE=1 SV=3	ANXA7	8.53734	9.15777e-07	Up	37	18	314	18	18	52.7	1.16504e+08	1.03572e+08	1.24236e+08	3.81204e+08	3.8911e+08	4.22414e+08	0.386177	0.376828	0.359798	2.98981	3.39817	3.19778
Q9NUL5	Shiftless antiviral inhibitor of ribosomal frameshifting protein OS=Homo sapiens OX=9606 GN=SHFL PE=1 SV=2	SHFL	8.48146	0.000146972	Up	29	6	45	6	6	33.1	1.49459e+07	1.41525e+07	2.38502e+07	4.99802e+07	6.55666e+07	63159606	0.349327	0.363077	0.487042	2.76407	4.03756	3.37143
P42356	Phosphatidylinositol 4-kinase alpha OS=Homo sapiens OX=9606 GN=PI4KA PE=1 SV=4	PI4KA	8.43869	1.15212e-06	Up	14	22	99	22	22	236.7	1.50511e+07	1.35063e+07	1.89175e+07	5.26521e+07	5.22309e+07	5.66585e+07	0.389597	0.383743	0.427834	3.2248	3.56206	3.34948
Q9NYL4	Peptidyl-prolyl cis-trans isomerase FKBP11 OS=Homo sapiens OX=9606 GN=FKBP11 PE=1 SV=1	FKBP11	8.41574	8.83961e-07	Up	41	6	164	6	6	22.2	1.48393e+08	1.27966e+08	1.72461e+08	4.8442e+08	4.85608e+08	5.57553e+08	0.338896	0.320779	0.34412	2.61769	2.92192	2.90808
Q15811	Intersectin-1 OS=Homo sapiens OX=9606 GN=ITSN1 PE=1 SV=3	ITSN1	8.40333	4.53676e-05	Up	4	4	21	4	4	195.3	3.26719e+06	3.70917e+06	3.25929e+06	1.10722e+07	1.14685e+07	1.27783e+07	0.351006	0.437395	0.305934	2.81459	3.24618	3.13529
Q9Y4F1	FERM, ARHGEF and pleckstrin domain-containing protein 1 OS=Homo sapiens OX=9606 GN=FARP1 PE=1 SV=1	FARP1	8.23234	1.75666e-06	Up	36	27	262	27	27	118.6	1.82166e+07	1.71061e+07	1.98275e+07	6.64909e+07	5.81198e+07	5.98533e+07	0.354108	0.364986	0.336744	3.05824	2.97659	2.65718
Q99961	Endophilin-A2 OS=Homo sapiens OX=9606 GN=SH3GL1 PE=1 SV=1	SH3GL1	8.1955	8.28542e-08	Up	33	12	141	12	12	41.5	1.13424e+08	1.013e+08	1.213e+08	3.86742e+08	3.35567e+08	3.98536e+08	0.429569	0.421108	0.401376	3.46568	3.34837	3.44714
Q8WZ42	Titin OS=Homo sapiens OX=9606 GN=TTN PE=1 SV=4	TTN	8.1923	0.00191218	Up	0	3	11	3	3	3813.7	1.26981e+06	1.98971e+06	916712	4.17559e+06	4.82302e+06	5.37196e+06	0.368975	0.634606	0.232732	2.8709	3.69237	3.56497
Q9H583	HEAT repeat-containing protein 1 OS=Homo sapiens OX=9606 GN=HEATR1 PE=1 SV=3	HEATR1	8.19172	2.28698e-05	Up	10	14	52	14	14	242.2	9.82353e+06	1.04089e+07	9.72242e+06	3.54254e+07	3.21088e+07	3.29402e+07	0.411229	0.478274	0.355595	3.50891	3.54133	3.14925
Q9BYX4	Interferon-induced helicase C domain-containing protein 1 OS=Homo sapiens OX=9606 GN=IFIH1 PE=1 SV=3	IFIH1	8.17989	2.06157e-05	Up	15	12	39	12	12	116.6	5.14965e+06	3.78397e+06	4.81663e+06	1.7437e+07	1.31115e+07	1.52018e+07	0.377234	0.304255	0.308278	3.02236	2.53054	2.54328
O95219	Sorting nexin-4 OS=Homo sapiens OX=9606 GN=SNX4 PE=1 SV=1	SNX4	8.1692	5.29075e-06	Up	25	10	42	10	10	51.9	1.87417e+07	1.55733e+07	2.23409e+07	5.73984e+07	5.95102e+07	6.98826e+07	0.402023	0.366672	0.418704	2.91329	3.36327	3.42355
P51151	Ras-related protein Rab-9A OS=Homo sapiens OX=9606 GN=RAB9A PE=1 SV=1	RAB9A	8.16304	9.09429e-07	Up	55	7	47	7	7	22.8	1.18536e+07	1.07748e+07	12783793	4.11153e+07	3.34341e+07	4.33943e+07	0.405045	0.404128	0.381662	3.32429	3.01004	3.38651
Q5UIP0	Telomere-associated protein RIF1 OS=Homo sapiens OX=9606 GN=RIF1 PE=1 SV=2	RIF1	8.06898	0.000128488	Up	2	3	11	3	3	274.3	496776	311167	605350	1415540	1.47994e+06	1656656	0.425053	0.292235	0.452537	2.8658	3.33622	3.23728
Q13393	Phospholipase D1 OS=Homo sapiens OX=9606 GN=PLD1 PE=1 SV=1	PLD1	8.06819	3.12124e-06	Up	11	9	36	9	9	124.1	1.57108e+06	1.29367e+06	1.8049e+06	5.62201e+06	4.60557e+06	4.99988e+06	0.323624	0.292497	0.324833	2.74015	2.49949	2.35215
Q9H4G0	Band 4.1-like protein 1 OS=Homo sapiens OX=9606 GN=EPB41L1 PE=1 SV=2	EPB41L1	8.06034	0.00383903	Up	6	4	27	3	3	98.4	332611	213893	799456	1.50676e+06	1.59716e+06	1.06407e+06	0.23581	0.166448	0.495205	2.52761	2.98334	1.72291
Q7Z7M9	Polypeptide N-acetylgalactosaminyltransferase 5 OS=Homo sapiens OX=9606 GN=GALNT5 PE=1 SV=1	GALNT5	8.05394	5.52017e-06	Up	18	13	69	13	13	106.2	3.04152e+07	3.3809e+07	3.67654e+07	1.13235e+08	9.68908e+07	1.22314e+08	0.349501	0.426428	0.369116	3.07878	2.93338	3.20996
Q96ST3	Paired amphipathic helix protein Sin3a OS=Homo sapiens OX=9606 GN=SIN3A PE=1 SV=2	SIN3A	8.04907	1.519e-06	Up	9	9	21	9	9	145.1	6.62835e+06	5.70824e+06	6.76732e+06	2.2064e+07	1.97383e+07	2.06514e+07	0.401442	0.379469	0.358096	3.16186	3.1496	2.85648
P33992	DNA replication licensing factor MCM5 OS=Homo sapiens OX=9606 GN=MCM5 PE=1 SV=5	MCM5	8.03752	5.55369e-07	Up	19	12	57	12	12	82.2	2.48682e+07	2.28396e+07	2.80911e+07	8.12591e+07	7.29814e+07	9.3741e+07	0.429478	0.432952	0.423867	3.32054	3.32075	3.69735
Q5T1M5	FK506-binding protein 15 OS=Homo sapiens OX=9606 GN=FKBP15 PE=1 SV=2	FKBP15	7.99715	4.67532e-05	Up	17	15	85	15	15	133.5	2.59468e+07	2.41807e+07	2.84754e+07	9.41876e+07	8.78315e+07	7.20057e+07	0.359029	0.367258	0.344255	3.08376	3.20202	2.27551
P49768	Presenilin-1 OS=Homo sapiens OX=9606 GN=PSEN1 PE=1 SV=1	PSEN1	7.95807	8.08467e-06	Up	6	2	7	2	2	52.6	3.67515e+06	3.4867e+06	5.09978e+06	1.24002e+07	12734125	1.41302e+07	0.359835	0.374713	0.436259	2.87276	3.28492	3.15968
O14786	Neuropilin-1 OS=Homo sapiens OX=9606 GN=NRP1 PE=1 SV=3	NRP1	7.95044	6.38166e-06	Up	36	22	151	22	22	103.1	1.21169e+07	1.02909e+07	1.45001e+07	3.68328e+07	3.55132e+07	4.64765e+07	0.371448	0.346272	0.388366	2.67167	2.8683	3.25391
Q8N122	Regulatory-associated protein of mTOR OS=Homo sapiens OX=9606 GN=RPTOR PE=1 SV=1	RPTOR	7.88067	1.5728e-07	Up	3	4	32	4	4	148.9	1.96782e+07	1.88527e+07	2.16745e+07	6.53079e+07	5.97702e+07	6.80387e+07	0.412978	0.434281	0.397425	3.243	3.30486	3.26108
O95202	Mitochondrial proton/calcium exchanger protein OS=Homo sapiens OX=9606 GN=LETM1 PE=1 SV=1	LETM1	7.81011	0.000110622	Up	40	21	219	21	21	83.3	8.42463e+07	9.50332e+07	1.01326e+08	3.77653e+08	2.54326e+08	2.62903e+08	0.441809	0.547035	0.46427	4.68617	3.51401	3.14879
Q8N8Z6	Discoidin, CUB and LCCL domain-containing protein 1 OS=Homo sapiens OX=9606 GN=DCBLD1 PE=1 SV=2	DCBLD1	7.80057	0.00142808	Up	8	3	13	3	3	77.9	279064	315957	439344	654320	1.23025e+06	1.35163e+06	0.384061	0.477286	0.528282	2.13072	4.46084	4.24834
Q96L92	Sorting nexin-27 OS=Homo sapiens OX=9606 GN=SNX27 PE=1 SV=2	SNX27	7.76015	3.95227e-05	Up	20	7	28	7	7	61.2	6.65789e+06	6.96384e+06	8.12776e+06	1.9439e+07	2.13017e+07	28010369	0.388496	0.44602	0.414367	2.68389	3.27485	3.73279
Q9NUQ8	ATP-binding cassette sub-family F member 3 OS=Homo sapiens OX=9606 GN=ABCF3 PE=1 SV=2	ABCF3	7.75251	2.52766e-06	Up	26	12	67	12	12	79.7	16285846	1.25812e+07	1.75404e+07	5.12651e+07	4.29182e+07	5.15564e+07	0.466638	0.395683	0.43911	3.47562	3.23995	3.37379
Q15645	Pachytene checkpoint protein 2 homolog OS=Homo sapiens OX=9606 GN=TRIP13 PE=1 SV=2	TRIP13	7.73547	4.20422e-07	Up	30	11	34	11	11	48.5	1.41197e+07	1.28837e+07	1.65672e+07	4.41485e+07	4.43171e+07	4.78845e+07	0.421031	0.421683	0.431622	3.11492	3.48168	3.26099
Q7KYR7	Butyrophilin subfamily 2 member A1 OS=Homo sapiens OX=9606 GN=BTN2A1 PE=1 SV=3	BTN2A1	7.61392	0.0133822	Up	22	11	88	11	11	59.6	7.66614e+06	6.60995e+06	1.13474e+07	9.55049e+06	3.21491e+07	3.58154e+07	0.326665	0.309157	0.42246	0.962925	3.60929	3.48546
Q63ZY3	KN motif and ankyrin repeat domain-containing protein 2 OS=Homo sapiens OX=9606 GN=KANK2 PE=1 SV=1	KANK2	7.55948	1.51344e-06	Up	17	11	57	11	11	91.1	1.33502e+07	1.1545e+07	1.39855e+07	3.92832e+07	3.50891e+07	4.54009e+07	0.436695	0.414514	0.399699	3.04045	3.02406	3.39171
Q13630	GDP-L-fucose synthase OS=Homo sapiens OX=9606 GN=GFUS PE=1 SV=1	GFUS	7.55348	9.01508e-05	Up	34	10	84	10	10	35.9	2.54125e+07	2.8378e+07	2.70725e+07	8.44304e+07	6.43702e+07	1.03566e+08	0.385848	0.472941	0.35914	3.03325	2.57503	3.59131
Q5VZL5	Zinc finger MYM-type protein 4 OS=Homo sapiens OX=9606 GN=ZMYM4 PE=1 SV=1	ZMYM4	7.49702	3.67251e-05	Up	2	2	10	2	2	172.7	1.03454e+06	1.25424e+06	1.24155e+06	3.41192e+06	3.26342e+06	4.17643e+06	0.43608	0.580305	0.457245	3.40298	3.62427	4.02059
Q8IWE4	DCN1-like protein 3 OS=Homo sapiens OX=9606 GN=DCUN1D3 PE=1 SV=1	DCUN1D3	7.4919	0.00281526	Up	15	4	32	4	4	34.3	1.04926e+06	692254	2.58253e+06	4.28597e+06	4.04825e+06	4.22581e+06	0.290609	0.210448	0.624933	2.80875	2.95405	2.673
O15230	Laminin subunit alpha-5 OS=Homo sapiens OX=9606 GN=LAMA5 PE=1 SV=8	LAMA5	7.41841	0.00217067	Up	2	5	12	5	5	399.5	544645	224838	343862	859629	1.35952e+06	1.08766e+06	0.754437	0.34185	0.416158	2.81748	4.9616	3.44085
Q9UBH6	Xenotropic and polytropic retrovirus receptor 1 OS=Homo sapiens OX=9606 GN=XPR1 PE=1 SV=1	XPR1	7.38972	0.00672524	Up	5	3	6	3	3	81.5	234557	275199	260017	883487	317857	1189389	0.312912	0.402974	0.303068	2.78878	1.11721	3.62379
Q9H270	Vacuolar protein sorting-associated protein 11 homolog OS=Homo sapiens OX=9606 GN=VPS11 PE=1 SV=1	VPS11	7.3846	3.03257e-05	Up	32	22	96	22	22	107.8	2.09546e+07	2.12431e+07	2.63379e+07	7.0435e+07	72184899	6.13078e+07	0.385299	0.428737	0.423121	3.06441	3.49697	2.57453
Q96I25	Splicing factor 45 OS=Homo sapiens OX=9606 GN=RBM17 PE=1 SV=1	RBM17	7.32267	1.40947e-05	Up	28	9	35	8	9	44.9	1.07806e+07	8.8105e+06	1.35322e+07	3.38057e+07	3.23128e+07	3.11808e+07	0.462657	0.415024	0.507398	3.43279	3.65358	3.0561
P56182	Ribosomal RNA processing protein 1 homolog A OS=Homo sapiens OX=9606 GN=RRP1 PE=1 SV=1	RRP1	7.31851	2.96863e-06	Up	25	9	41	9	9	52.8	1.44618e+07	1.25669e+07	1.63783e+07	4.41178e+07	3.58679e+07	4.93144e+07	0.465063	0.44358	0.460175	3.35694	3.03894	3.62182
P29218	Inositol monophosphatase 1 OS=Homo sapiens OX=9606 GN=IMPA1 PE=1 SV=1	IMPA1	7.27952	1.04472e-05	Up	27	7	41	7	7	30.2	1.0007e+07	8.8318e+06	1.18898e+07	3.29894e+07	2.94948e+07	2.77027e+07	0.416941	0.403902	0.432822	3.25226	3.23775	2.63607
Q9H1X3	DnaJ homolog subfamily C member 25 OS=Homo sapiens OX=9606 GN=DNAJC25 PE=1 SV=1	DNAJC25	7.277	2.73896e-05	Up	29	8	45	8	8	42.4	5.98321e+06	5.478e+06	7.25869e+06	2.20243e+07	1.63344e+07	1.67686e+07	0.408848	0.41087	0.433361	3.56099	2.94075	2.61691
Q9Y6I8	Peroxisomal membrane protein 4 OS=Homo sapiens OX=9606 GN=PXMP4 PE=1 SV=3	PXMP4	7.22435	2.91201e-06	Up	8	2	3	2	2	24.2	1292288	1.19892e+06	1.4201e+06	3.86134e+06	3.84221e+06	3742431	0.46951	0.478113	0.450785	3.31944	3.67785	3.10531
Q9HCJ6	Synaptic vesicle membrane protein VAT-1 homolog-like OS=Homo sapiens OX=9606 GN=VAT1L PE=1 SV=2	VAT1L	7.21704	1.3111e-05	Up	19	6	20	6	6	45.9	1.09425e+07	8.32754e+06	1.07191e+07	2.9159e+07	2.48922e+07	3.41323e+07	0.507091	0.423588	0.434005	3.19731	3.03922	3.61245
Q86YP4	Transcriptional repressor p66-alpha OS=Homo sapiens OX=9606 GN=GATAD2A PE=1 SV=1	GATAD2A	7.19003	0.000105594	Up	6	4	12	4	4	68	3.2308e+06	2.64293e+06	3.07077e+06	9.90173e+06	6.27483e+06	10253327	0.534981	0.480364	0.444264	3.87955	2.73753	3.87756
Q08378	Golgin subfamily A member 3 OS=Homo sapiens OX=9606 GN=GOLGA3 PE=1 SV=2	GOLGA3	7.17616	3.28281e-06	Up	26	31	160	31	31	167.3	1.24986e+08	1.18643e+08	1.35458e+08	3.74778e+08	3.67428e+08	3.61634e+08	0.484418	0.504729	0.458702	3.43696	3.75197	3.20107
Q9H0D6	5'-3' exoribonuclease 2 OS=Homo sapiens OX=9606 GN=XRN2 PE=1 SV=1	XRN2	7.10473	1.43318e-05	Up	31	16	76	16	16	108.5	2.21407e+07	2.01115e+07	2.77078e+07	7.5493e+07	6.33099e+07	6.16098e+07	0.422389	0.421136	0.461836	3.40776	3.18215	2.68433
Q9Y3A6	Transmembrane emp24 domain-containing protein 5 OS=Homo sapiens OX=9606 GN=TMED5 PE=1 SV=1	TMED5	7.06111	1.40251e-06	Up	34	7	84	7	7	26	3.33608e+07	3.14435e+07	3.94475e+07	1.05201e+08	8.40285e+07	1.10482e+08	0.414225	0.428536	0.427941	3.09071	2.74887	3.13298
P50914	60S ribosomal protein L14 OS=Homo sapiens OX=9606 GN=RPL14 PE=1 SV=4	RPL14	7.05319	1.96501e-06	Up	30	8	216	8	8	23.4	7.81769e+07	7.29847e+07	9.9481e+07	2.28823e+08	2.19769e+08	2.66667e+08	0.416531	0.426832	0.463099	2.88475	3.08505	3.24492
Q08722	Leukocyte surface antigen CD47 OS=Homo sapiens OX=9606 GN=CD47 PE=1 SV=1	CD47	7.00059	4.21794e-05	Up	9	3	65	3	3	35.2	3.13229e+07	2.73971e+07	33184152	9.04256e+07	9.27023e+07	7.64367e+07	0.41642	0.399789	0.385448	2.84448	3.24705	2.3208
Q8NFW8	N-acylneuraminate cytidylyltransferase OS=Homo sapiens OX=9606 GN=CMAS PE=1 SV=2	CMAS	6.97106	1.84304e-07	Up	41	14	100	14	14	48.3	3.35511e+07	2.95732e+07	3.97027e+07	9.72946e+07	9.18825e+07	1.00573e+08	0.459381	0.444448	0.474955	3.15207	3.31457	3.14493
Q03113	Guanine nucleotide-binding protein subunit alpha-12 OS=Homo sapiens OX=9606 GN=GNA12 PE=1 SV=4	GNA12	6.93813	0.00916185	Up	14	5	86	3	3	44.3	473770	332277	711710	865343	2.27482e+06	915514	0.449338	0.345908	0.589757	1.94193	5.68434	1.98306
Q9BY76	Angiopoietin-related protein 4 OS=Homo sapiens OX=9606 GN=ANGPTL4 PE=1 SV=2	ANGPTL4	6.92386	8.7361e-05	Up	8	3	26	3	3	45.2	2542065	2588994	2270946	6465160	7.08606e+06	7.46451e+06	0.36805	0.411441	0.287271	2.21483	2.70304	2.46824
Q7Z6Z7	E3 ubiquitin-protein ligase HUWE1 OS=Homo sapiens OX=9606 GN=HUWE1 PE=1 SV=3	HUWE1	6.89379	3.37076e-06	Up	20	64	357	64	64	481.6	1.20139e+08	1.01889e+08	120466166	3.18263e+08	2.8075e+08	3.64314e+08	0.497601	0.463214	0.435941	3.11907	3.0637	3.44618
Q92819	Hyaluronan synthase 2 OS=Homo sapiens OX=9606 GN=HAS2 PE=1 SV=1	HAS2	6.87655	4.00415e-05	Up	8	4	17	4	4	63.5	1.16001e+06	993033	1.72081e+06	3.62691e+06	3.32223e+06	3.71138e+06	0.418191	0.392944	0.542013	3.09378	3.15551	3.05571
Q14156	Protein EFR3 homolog A OS=Homo sapiens OX=9606 GN=EFR3A PE=1 SV=2	EFR3A	6.84976	0.000650915	Up	22	15	65	15	15	92.9	2.83807e+06	2.00975e+06	3.83322e+06	5.77256e+06	8.30835e+06	9.60774e+06	0.363119	0.282243	0.428504	1.74757	2.80071	2.80745
Q96K76	Ubiquitin carboxyl-terminal hydrolase 47 OS=Homo sapiens OX=9606 GN=USP47 PE=1 SV=3	USP47	6.80054	3.68434e-06	Up	15	16	59	16	16	157.2	1.13255e+07	1.07629e+07	1.45676e+07	3.15727e+07	3.21637e+07	3.69849e+07	0.400112	0.41736	0.449653	2.63924	2.99378	2.98411
O95361	Tripartite motif-containing protein 16 OS=Homo sapiens OX=9606 GN=TRIM16 PE=1 SV=3	TRIM16	6.77896	7.04193e-06	Up	28	13	101	13	13	63.9	1.76634e+07	1.62e+07	2.03669e+07	5.39492e+07	4.01054e+07	5.58679e+07	0.477134	0.480328	0.480681	3.4482	2.85428	3.44662
P02753	Retinol-binding protein 4 OS=Homo sapiens OX=9606 GN=RBP4 PE=1 SV=3	RBP4	6.76148	2.96284e-05	Up	9	2	13	2	2	23	2.37871e+06	2.80955e+06	2669073	7275364	6.80987e+06	7682802	0.392123	0.50836	0.384419	2.83776	2.95765	2.89244
P49790	Nuclear pore complex protein Nup153 OS=Homo sapiens OX=9606 GN=NUP153 PE=1 SV=2	NUP153	6.66666	2.9149e-07	Up	16	17	71	17	17	153.8	1.28762e+07	1.22005e+07	1.5058e+07	37521408	3.44488e+07	36466832	0.469934	0.488744	0.480155	3.24018	3.31246	3.03957
P00749	Urokinase-type plasminogen activator OS=Homo sapiens OX=9606 GN=PLAU PE=1 SV=2	PLAU	6.62328	5.29405e-05	Up	5	2	11	2	2	48.5	119277	125073	157073	303289	355402	417820	0.194298	0.22363	0.223551	1.16898	1.52531	1.5544
O14936	Peripheral plasma membrane protein CASK OS=Homo sapiens OX=9606 GN=CASK PE=1 SV=3	CASK	6.58262	4.94309e-06	Up	35	25	175	25	25	105.1	1.14318e+07	1.14009e+07	1.59147e+07	3.53032e+07	3.17462e+07	3.58968e+07	0.327537	0.358543	0.398389	2.39331	2.39643	2.3489
O94808	Glutamine--fructose-6-phosphate aminotransferase [isomerizing] 2 OS=Homo sapiens OX=9606 GN=GFPT2 PE=1 SV=3	GFPT2	6.57804	1.20584e-07	Up	60	37	500	31	38	76.9	2.32317e+08	2.18306e+08	2.78033e+08	6.57516e+08	5.78759e+08	7.10088e+08	0.465914	0.480559	0.487177	3.12012	3.05809	3.25238
Q8NFJ5	Retinoic acid-induced protein 3 OS=Homo sapiens OX=9606 GN=GPRC5A PE=1 SV=2	GPRC5A	6.573	3.23755e-05	Up	6	2	6	2	2	40.2	1.45943e+06	1.55072e+06	1.62124e+06	4.71887e+06	3.8623e+06	3831247	0.591887	0.690312	0.574471	4.5283	4.12696	3.54864
Q9UDY4	DnaJ homolog subfamily B member 4 OS=Homo sapiens OX=9606 GN=DNAJB4 PE=1 SV=1	DNAJB4	6.55926	1.79788e-05	Up	31	10	149	9	10	37.8	8.21298e+07	7.03505e+07	1.05744e+08	2.14861e+08	2.33412e+08	2.31127e+08	0.426515	0.401011	0.479796	2.64018	3.19364	2.74126
P17813	Endoglin OS=Homo sapiens OX=9606 GN=ENG PE=1 SV=2	ENG	6.50723	9.14782e-05	Up	28	12	132	12	12	70.5	1.23637e+07	8.88882e+06	1.63073e+07	3.11495e+07	2.94715e+07	3.7351e+07	0.4	0.315655	0.460956	2.38454	2.51213	2.75982
Q9NZQ7	Programmed cell death 1 ligand 1 OS=Homo sapiens OX=9606 GN=CD274 PE=1 SV=1	CD274	6.50683	8.30394e-05	Up	16	3	15	3	3	33.3	490238	588985	560134	1.70046e+06	1.25981e+06	1.41786e+06	0.471285	0.621493	0.470471	3.86796	3.19087	3.11297
Q9BUI4	DNA-directed RNA polymerase III subunit RPC3 OS=Homo sapiens OX=9606 GN=POLR3C PE=1 SV=1	POLR3C	6.4771	2.61814e-06	Up	4	2	9	2	2	60.6	542048	506223	671144	1.62491e+06	1.2693e+06	1.62839e+06	0.440285	0.451329	0.476296	3.12296	2.71636	3.02078
Q7L5Y1	Mitochondrial enolase superfamily member 1 OS=Homo sapiens OX=9606 GN=ENOSF1 PE=1 SV=1	ENOSF1	6.46547	0.00554732	Up	16	5	7	5	5	49.8	1.00267e+06	1.1915e+06	745749	2.83912e+06	2.29617e+06		0.404576	0.527708	0.262906	2.71061	2.44103
Q6I9Y2	THO complex subunit 7 homolog OS=Homo sapiens OX=9606 GN=THOC7 PE=1 SV=3	THOC7	6.44487	0.000156368	Up	16	3	6	3	3	23.7	2.02591e+06	2.75345e+06	2.2946e+06	6.53964e+06	5635682	6.62639e+06	0.399763	0.59637	0.395599	3.05336	2.92993	2.98624
Q9NWU5	39S ribosomal protein L22, mitochondrial OS=Homo sapiens OX=9606 GN=MRPL22 PE=1 SV=1	MRPL22	6.42753	0.000154282	Up	16	3	30	3	3	23.6	4.84707e+06	5.81616e+06	4.75121e+06	1.52297e+07	1.16457e+07	1.40777e+07	0.496003	0.653277	0.42479	3.68755	3.13978	3.29004
Q9NVS2	39S ribosomal protein S18a, mitochondrial OS=Homo sapiens OX=9606 GN=MRPS18A PE=1 SV=1	MRPS18A	6.4142	3.14897e-05	Up	18	4	12	4	4	22.2	1.18856e+07	9.74706e+06	10844219	2.97031e+07	2.30696e+07	3.2651e+07	0.535705	0.482209	0.42704	3.16773	2.73951	3.36098
Q15020	Squamous cell carcinoma antigen recognized by T-cells 3 OS=Homo sapiens OX=9606 GN=SART3 PE=1 SV=1	SART3	6.38749	8.00709e-07	Up	22	19	104	19	19	109.9	3.47327e+07	2.9378e+07	4.13541e+07	9.50453e+07	8.2347e+07	9.49138e+07	0.470947	0.437232	0.489911	3.04933	2.94177	2.93919
P06241	Tyrosine-protein kinase Fyn OS=Homo sapiens OX=9606 GN=FYN PE=1 SV=3	FYN	6.35932	0.000589735	Up	18	7	29	3	3	60.7	221225	289481	294414	604026	530002	979791	0.451641	0.648686	0.525149	2.9178	2.85078	4.56833
P08174	Complement decay-accelerating factor OS=Homo sapiens OX=9606 GN=CD55 PE=1 SV=4	CD55	6.35756	6.65752e-05	Up	35	10	70	10	10	41.4	4.50009e+06	4.47853e+06	5.58258e+06	1.52266e+07	1.1238e+07	1.10491e+07	0.307572	0.335983	0.333369	2.46246	2.02367	1.72471
Q9Y4D7	Plexin-D1 OS=Homo sapiens OX=9606 GN=PLXND1 PE=1 SV=3	PLXND1	6.33872	0.000146724	Up	5	6	35	5	5	211.9	478718	644585	796618	1593226	1.60597e+06	1.72078e+06	0.309478	0.457389	0.449951	2.43707	2.73537	2.54063
Q8NB16	Mixed lineage kinase domain-like protein OS=Homo sapiens OX=9606 GN=MLKL PE=1 SV=1	MLKL	6.33153	5.39657e-05	Up	14	6	30	6	6	54.4	3.33735e+06	3.23161e+06	5.02159e+06	9.84039e+06	8.20658e+06	1.15869e+07	0.241355	0.256525	0.317293	1.68387	1.56367	1.91376
Q8WVQ1	Soluble calcium-activated nucleotidase 1 OS=Homo sapiens OX=9606 GN=CANT1 PE=1 SV=1	CANT1	6.33031	1.15624e-07	Up	21	6	24	6	6	44.8	8.54345e+06	8.21083e+06	9.72855e+06	2.35253e+07	2.041e+07	2.43026e+07	0.489038	0.515884	0.486544	3.18629	3.07807	3.17707
Q9Y5S2	Serine/threonine-protein kinase MRCK beta OS=Homo sapiens OX=9606 GN=CDC42BPB PE=1 SV=2	CDC42BPB	6.32985	2.06745e-06	Up	26	36	286	31	36	194.2	1.12652e+08	9.27074e+07	1.27723e+08	2.90676e+08	2.75016e+08	2.85129e+08	0.462701	0.417956	0.458345	2.82495	2.97608	2.67465
Q96JB5	CDK5 regulatory subunit-associated protein 3 OS=Homo sapiens OX=9606 GN=CDK5RAP3 PE=1 SV=2	CDK5RAP3	6.31614	1.03697e-05	Up	35	15	116	15	15	56.9	2.74323e+07	2.26652e+07	2.70029e+07	7.225e+07	5.48738e+07	7.17584e+07	0.51115	0.463553	0.439603	3.1854	2.69388	3.05368
Q14644	Ras GTPase-activating protein 3 OS=Homo sapiens OX=9606 GN=RASA3 PE=1 SV=3	RASA3	6.30869	0.000206494	Up	25	14	95	14	14	95.6	3.50227e+06	4.35669e+06	5303690	1.30558e+07	8.3577e+06	1.25162e+07	0.341146	0.465804	0.45137	3.00909	2.14489	2.78436
Q6UVK1	Chondroitin sulfate proteoglycan 4 OS=Homo sapiens OX=9606 GN=CSPG4 PE=1 SV=2	CSPG4	6.28933	4.53101e-07	Up	34	54	435	54	54	250.4	6.48125e+07	6.09419e+07	8.09504e+07	1.7367e+08	1.62254e+08	1.90355e+08	0.526294	0.543176	0.574319	3.33683	3.4713	3.5302
Q13641	Trophoblast glycoprotein OS=Homo sapiens OX=9606 GN=TPBG PE=1 SV=1	TPBG	6.26385	3.18391e-06	Up	23	9	76	9	9	46	4.29021e+06	4.53386e+06	5.23938e+06	1.17235e+07	1.09153e+07	1.32326e+07	0.287537	0.333533	0.306804	1.85915	1.92743	2.02548
Q01974	Tyrosine-protein kinase transmembrane receptor ROR2 OS=Homo sapiens OX=9606 GN=ROR2 PE=1 SV=2	ROR2	6.25764	0.000442151	Up	10	6	31	5	6	104.7	1.181e+06	899169	784797	2.18367e+06	2.45106e+06	2.72891e+06	0.486313	0.406409	0.282351	2.12762	2.65918	2.56638
Q6NUK4	Receptor expression-enhancing protein 3 OS=Homo sapiens OX=9606 GN=REEP3 PE=1 SV=1	REEP3	6.25026	0.00151492	Up	8	2	9	2	2	29.2	1.60694e+06	785372	2.15324e+06	3.97944e+06	3.65015e+06	3.57184e+06	0.510846	0.274044	0.598063	2.99332	3.05723	2.59326
O14683	Tumor protein p53-inducible protein 11 OS=Homo sapiens OX=9606 GN=TP53I11 PE=1 SV=2	TP53I11	6.24111	0.0188863	Up	13	2	30	2	2	21	3.02092e+06	3.82283e+06	5.55083e+06	6.42407e+06	4794699	20788398	0.295896	0.410998	0.475031	1.48885	1.23734	4.65035
Q9ULF5	Zinc transporter ZIP10 OS=Homo sapiens OX=9606 GN=SLC39A10 PE=1 SV=2	SLC39A10	6.22679	0.0188887	Up	4	4	16	4	4	94.1	222833	705589	875953	1.10829e+06	953625	2.55739e+06	0.160681	0.558459	0.551861	1.89095	1.81171	4.21159
O00339	Matrilin-2 OS=Homo sapiens OX=9606 GN=MATN2 PE=1 SV=4	MATN2	6.19949	0.00677605	Up	10	5	20	5	5	106.8	1.17873e+06	1.23315e+06	493695	2.28655e+06	2.81847e+06	2.42437e+06	0.543778	0.624425	0.19899	2.49591	3.42569	2.5543
P12268	Inosine-5'-monophosphate dehydrogenase 2 OS=Homo sapiens OX=9606 GN=IMPDH2 PE=1 SV=2	IMPDH2	6.19683	1.87457e-06	Up	48	20	344	19	20	55.8	3.69645e+08	3.28966e+08	4.04738e+08	8.94705e+08	8.26907e+08	1.06133e+09	0.476043	0.465017	0.455408	2.72636	2.80573	3.12159
Q96EK5	KIF-binding protein OS=Homo sapiens OX=9606 GN=KIFBP PE=1 SV=1	KIFBP	6.18302	0.000330333	Up	36	15	91	15	15	71.8	3.07635e+07	2.06957e+07	2.57995e+07	7.74104e+07	6.25017e+07	5.35076e+07	0.612057	0.451951	0.448469	3.64415	3.27624	2.43129
O43813	Glutathione S-transferase LANCL1 OS=Homo sapiens OX=9606 GN=LANCL1 PE=1 SV=1	LANCL1	6.14403	0.000196083	Up	24	8	63	8	8	45.3	14106271	1.46552e+07	1.79849e+07	3.81713e+07	4.44909e+07	3.26241e+07	0.401656	0.458025	0.447419	2.5717	3.33765	2.12152
Q8NHP8	Putative phospholipase B-like 2 OS=Homo sapiens OX=9606 GN=PLBD2 PE=1 SV=2	PLBD2	6.13319	7.62093e-06	Up	23	10	125	10	10	65.4	3.42545e+07	2.87304e+07	3.36973e+07	8.32544e+07	6.81302e+07	9.08907e+07	0.416491	0.38343	0.357972	2.39517	2.18251	2.5239
P22413	Ectonucleotide pyrophosphatase/phosphodiesterase family member 1 OS=Homo sapiens OX=9606 GN=ENPP1 PE=1 SV=2	ENPP1	6.12063	2.44007e-05	Up	35	22	209	22	22	104.9	2.26395e+07	1.639e+07	2.27125e+07	5.42217e+07	4.92798e+07	4.90421e+07	0.581761	0.462288	0.509927	3.2968	3.33637	2.87814
Q5K651	Sterile alpha motif domain-containing protein 9 OS=Homo sapiens OX=9606 GN=SAMD9 PE=1 SV=1	SAMD9	6.10477	7.54947e-07	Up	18	23	108	22	23	184.2	1.5241e+07	1.30155e+07	1.55286e+07	3.70426e+07	3.29697e+07	3.87811e+07	0.459721	0.430923	0.409242	2.64378	2.62015	2.67158
Q07020	60S ribosomal protein L18 OS=Homo sapiens OX=9606 GN=RPL18 PE=1 SV=2	RPL18	6.09628	2.97369e-06	Up	43	8	178	8	8	21.6	1.07432e+08	1.106e+08	1.2828e+08	2.99487e+08	2.46563e+08	3.15274e+08	0.45624	0.515551	0.475973	3.00939	2.75877	3.05782
Q92963	GTP-binding protein Rit1 OS=Homo sapiens OX=9606 GN=RIT1 PE=1 SV=1	RIT1	6.08436	1.47123e-06	Up	11	2	75	2	2	25.1	4.95577e+06	5.02713e+06	6.45742e+06	1.38836e+07	1.2444e+07	1.41939e+07	0.463553	0.516136	0.527731	3.07277	3.06673	3.03219
Q9P2K5	Myelin expression factor 2 OS=Homo sapiens OX=9606 GN=MYEF2 PE=1 SV=3	MYEF2	6.06	0.00232701	Up	4	2	2	2	2	64.1	269849	226493	179736	500268	376101	840195	0.607671	0.559831	0.353629	2.66557	2.23141	4.32108
P55011	Solute carrier family 12 member 2 OS=Homo sapiens OX=9606 GN=SLC12A2 PE=1 SV=1	SLC12A2	6.03315	8.44882e-05	Up	9	8	25	8	8	131.4	1.98006e+06	1.91405e+06	2.34445e+06	5995824	4.90452e+06	4.32185e+06	0.502858	0.533552	0.520202	3.60294	3.28164	2.5067
P21926	CD9 antigen OS=Homo sapiens OX=9606 GN=CD9 PE=1 SV=4	CD9	6.01964	5.41725e-06	Up	18	4	66	4	4	25.4	1.04675e+07	8.2926e+06	1.16995e+07	23606515	2.3836e+07	26568546	0.546265	0.475013	0.533445	2.91495	3.27733	3.16659
Q03252	Lamin-B2 OS=Homo sapiens OX=9606 GN=LMNB2 PE=1 SV=4	LMNB2	6.0133	7.75601e-06	Up	68	36	325	33	35	69.9	4.09084e+08	3.7171e+08	4.97294e+08	1.12399e+09	9.99973e+08	9.77281e+08	0.477117	0.475853	0.506746	3.10182	3.07276	2.60314
Q8NHH9	Atlastin-2 OS=Homo sapiens OX=9606 GN=ATL2 PE=1 SV=2	ATL2	6.0111	6.47651e-06	Up	17	6	35	4	5	66.2	2.02942e+06	2.10736e+06	2.58886e+06	5.84358e+06	4.61559e+06	6.00416e+06	0.373683	0.425919	0.41649	2.54596	2.23917	2.52493
Q8IZ83	Aldehyde dehydrogenase family 16 member A1 OS=Homo sapiens OX=9606 GN=ALDH16A1 PE=1 SV=2	ALDH16A1	6.0106	0.00236397	Up	9	5	23	5	5	85.1	9.19217e+06	9.27363e+06	4.93289e+06	2.00994e+07	1.80342e+07	2.06954e+07	0.632729	0.700657	0.296665	3.27358	3.27058	3.25342
Q5BKT4	Dol-P-Glc:Glc(2)Man(9)GlcNAc(2)-PP-Dol alpha-1,2-glucosyltransferase OS=Homo sapiens OX=9606 GN=ALG10 PE=1 SV=1	ALG10	5.99321	0.000171101	Up	4	2	12	2	2	55.6	1.31007e+06	1.16237e+06	2.17958e+06	3.55752e+06	3.55248e+06	3.99926e+06	0.367175	0.357585	0.533725	2.35922	2.62324	2.55991
Q96BP3	Peptidylprolyl isomerase domain and WD repeat-containing protein 1 OS=Homo sapiens OX=9606 GN=PPWD1 PE=1 SV=1	PPWD1	5.95495	6.67831e-07	Up	14	6	18	6	6	73.5	2.86957e+06	2.52664e+06	3.10297e+06	6638982	6558980	7337588	0.544614	0.526345	0.514534	2.98136	3.27971	3.18046
P23229	Integrin alpha-6 OS=Homo sapiens OX=9606 GN=ITGA6 PE=1 SV=5	ITGA6	5.94583	0.000446358	Up	8	9	34	9	9	126.5	3.86382e+06	2.21023e+06	4.4567e+06	7.5021e+06	8.43408e+06	9.01041e+06	0.815183	0.511836	0.821517	3.74508	4.68817	4.34158
O95858	Tetraspanin-15 OS=Homo sapiens OX=9606 GN=TSPAN15 PE=1 SV=1	TSPAN15	5.93042	6.9875e-05	Up	11	2	9	2	2	33.1		396243	436878	1.06688e+06	910387	1.02524e+06		0.426431	0.374246	2.47508	2.35172	2.29574
O75116	Rho-associated protein kinase 2 OS=Homo sapiens OX=9606 GN=ROCK2 PE=1 SV=4	ROCK2	5.92713	2.94283e-06	Up	25	30	207	24	30	160.8	9.76094e+07	8.03785e+07	9.71327e+07	2.16732e+08	2.09858e+08	2.35896e+08	0.548905	0.496136	0.477239	2.88383	3.10928	3.02965
P11233	Ras-related protein Ral-A OS=Homo sapiens OX=9606 GN=RALA PE=1 SV=1	RALA	5.9221	0.00144228	Up	47	8	146	3	3	23.6	6697280	1.28639e+07	8.42665e+06	2.32744e+07	2.16657e+07	2.39636e+07	0.307174	0.647611	0.33768	2.52584	2.6181	2.51017
Q9H6B4	CXADR-like membrane protein OS=Homo sapiens OX=9606 GN=CLMP PE=1 SV=1	CLMP	5.89819	2.92972e-05	Up	37	8	70	8	8	41.3	6.52944e+06	7.28675e+06	7.78088e+06	1.88207e+07	1.41788e+07	1.92196e+07	0.420997	0.515695	0.438325	2.87131	2.40863	2.83017
O15162	Phospholipid scramblase 1 OS=Homo sapiens OX=9606 GN=PLSCR1 PE=1 SV=1	PLSCR1	5.87016	0.00103376	Up	22	7	93	7	7	35	6.5739e+06	1.00236e+07	6.62508e+06	2.018e+07	1.91368e+07	1.70702e+07	0.331588	0.554954	0.291965	2.40845	2.54315	1.96643
Q9H0X4	Protein FAM234A OS=Homo sapiens OX=9606 GN=FAM234A PE=1 SV=1	FAM234A	5.8591	4.37624e-06	Up	19	6	44	6	6	59.6	3.92492e+06	4.04656e+06	4.58877e+06	1.05502e+07	9.50212e+06	9.85731e+06	0.437196	0.494751	0.446587	2.78066	2.78865	2.50766
Q68D91	Acyl-coenzyme A thioesterase MBLAC2 OS=Homo sapiens OX=9606 GN=MBLAC2 PE=1 SV=3	MBLAC2	5.84531	0.00228665	Up	23	5	27	5	5	31.4	1.28e+06	1.05276e+06	657161	2.56555e+06	1.91701e+06	2.8336e+06	0.602756	0.544145	0.270376	2.85859	2.37839	3.04744
Q93034	Cullin-5 OS=Homo sapiens OX=9606 GN=CUL5 PE=1 SV=4	CUL5	5.82597	0.006895	Up	14	11	73	11	11	90.9	2.64744e+07	2.43883e+07	1.02091e+07	4.94725e+07	4.92055e+07	5.05564e+07	0.702461	0.710287	0.236673	3.106	3.43984	3.06364
P43121	Cell surface glycoprotein MUC18 OS=Homo sapiens OX=9606 GN=MCAM PE=1 SV=2	MCAM	5.80848	0.00240505	Up	35	17	144	17	17	71.6	2.25298e+07	1.88065e+07	2.03301e+07	3.1303e+07	6.45601e+07	4.80666e+07	0.567039	0.51954	0.447054	1.86416	4.28103	2.76289
Q99707	Methionine synthase OS=Homo sapiens OX=9606 GN=MTR PE=1 SV=2	MTR	5.80005	1.0107e-06	Up	12	11	49	11	11	140.4	9.43374e+06	9.35411e+06	1.10839e+07	2.43685e+07	2.22974e+07	2.36573e+07	0.513223	0.558574	0.52684	3.13683	3.19598	2.93936
P46776	60S ribosomal protein L27a OS=Homo sapiens OX=9606 GN=RPL27A PE=1 SV=2	RPL27A	5.78613	2.91305e-06	Up	28	6	195	6	6	16.6	2.14902e+08	2.0422e+08	2.26094e+08	5.05834e+08	4.51558e+08	5.67845e+08	0.51098	0.532988	0.469697	2.84585	2.82881	3.0836
Q16513	Serine/threonine-protein kinase N2 OS=Homo sapiens OX=9606 GN=PKN2 PE=1 SV=1	PKN2	5.77832	0.000259899	Up	12	9	25	7	9	112	4.49056e+06	6.34506e+06	7.25593e+06	1.43298e+07	1.17972e+07	1.65664e+07	0.34975	0.542437	0.49376	2.64082	2.42083	2.9468
Q5ZPR3	CD276 antigen OS=Homo sapiens OX=9606 GN=CD276 PE=1 SV=1	CD276	5.72967	0.000172227	Up	29	6	83	6	6	57.2	7.71204e+06	4.73621e+06	8.0622e+06	1.59249e+07	1.58263e+07	1.53057e+07	0.471306	0.317703	0.43048	2.30278	2.54824	2.13625
P13987	CD59 glycoprotein OS=Homo sapiens OX=9606 GN=CD59 PE=1 SV=1	CD59	5.7288	6.79009e-06	Up	28	8	216	8	8	14.2	75170343	5.70374e+07	75284455	1.65644e+08	1.42813e+08	1.74228e+08	0.53621	0.446585	0.469201	2.7958	2.68401	2.83838
Q96GZ6	Solute carrier family 41 member 3 OS=Homo sapiens OX=9606 GN=SLC41A3 PE=1 SV=2	SLC41A3	5.70868	0.0069109	Up	7	2	11	2	2	54.7	207586	385730	475079	1.14504e+06	790478	516501	0.325075	0.663015	0.650003	4.24274	3.26139	1.84723
Q5T160	Probable arginine--tRNA ligase, mitochondrial OS=Homo sapiens OX=9606 GN=RARS2 PE=1 SV=1	RARS2	5.70063	2.07214e-05	Up	22	9	39	9	9	65.5	7.9868e+06	6.56688e+06	9.33928e+06	1.98241e+07	1.47418e+07	2.07498e+07	0.596935	0.538727	0.609863	3.50581	2.9029	3.54188
P46379	Large proline-rich protein BAG6 OS=Homo sapiens OX=9606 GN=BAG6 PE=1 SV=2	BAG6	5.69014	7.58722e-05	Up	17	14	106	14	14	119.3	2.22948e+07	2.08902e+07	2.13104e+07	5.33233e+07	5.10134e+07	4.49701e+07	0.522299	0.537172	0.436187	2.95578	3.14867	2.40605
Q15075	Early endosome antigen 1 OS=Homo sapiens OX=9606 GN=EEA1 PE=1 SV=2	EEA1	5.6728	1.48679e-05	Up	40	47	221	47	47	162.4	2.23832e+08	2.09984e+08	2.55437e+08	6.10571e+08	4.76621e+08	5.00406e+08	0.424541	0.437159	0.423297	2.74015	2.38176	2.16763
Q99622	Protein C10 OS=Homo sapiens OX=9606 GN=C12orf57 PE=1 SV=1	C12orf57	5.61506	8.44031e-07	Up	40	3	22	3	3	13.2	5.0617e+06	4.48396e+06	5.94259e+06	1.14106e+07	1.07401e+07	1.30987e+07	0.542762	0.527752	0.556741	2.8951	3.03424	3.2078
Q9NZJ7	Mitochondrial carrier homolog 1 OS=Homo sapiens OX=9606 GN=MTCH1 PE=1 SV=1	MTCH1	5.61379	3.0236e-05	Up	31	10	147	10	10	41.5	4.62145e+07	4.29995e+07	5.8418e+07	9.98565e+07	1.1668e+08	1.17011e+08	0.460817	0.470619	0.508934	2.35596	3.06532	2.66467
P05362	Intercellular adhesion molecule 1 OS=Homo sapiens OX=9606 GN=ICAM1 PE=1 SV=2	ICAM1	5.56103	5.53046e-06	Up	24	11	139	11	11	57.8	1.69225e+07	1.65485e+07	2.26646e+07	4.17077e+07	3.76019e+07	4.70623e+07	0.314185	0.337238	0.36765	1.83223	1.83933	1.99554
Q9NP84	Tumor necrosis factor receptor superfamily member 12A OS=Homo sapiens OX=9606 GN=TNFRSF12A PE=1 SV=1	TNFRSF12A	5.53428	3.32656e-05	Up	23	2	18	2	2	13.9	1.84923e+06	1.54021e+06	1.68839e+06	3.67884e+06	3350300	4.47609e+06	0.589741	0.539146	0.470445	2.77601	2.81502	3.26012
Q14571	Inositol 1,4,5-trisphosphate receptor type 2 OS=Homo sapiens OX=9606 GN=ITPR2 PE=1 SV=2	ITPR2	5.52954	3.29267e-06	Up	10	22	110	16	22	307.9	1.58112e+07	1.26077e+07	1.8043e+07	3.48322e+07	3.1256e+07	3.78097e+07	0.478407	0.418719	0.476987	2.49376	2.49168	2.61277
Q9H7F0	Polyamine-transporting ATPase 13A3 OS=Homo sapiens OX=9606 GN=ATP13A3 PE=1 SV=4	ATP13A3	5.52814	0.000597798	Up	6	4	29	4	4	138	514307	442658	375513	843678	954996	1.23936e+06	0.356072	0.336387	0.227146	1.38208	1.74198	1.95964
Q9H4L7	SWI/SNF-related matrix-associated actin-dependent regulator of chromatin subfamily A containing DEAD/H box 1 OS=Homo sapiens OX=9606 GN=SMARCAD1 PE=1 SV=2	SMARCAD1	5.52239	0.0112848	Up	3	2	5	2	2	117.3	878096	637608	329246	1.81846e+06	1.44421e+06	961055	0.880694	0.701929	0.288515	4.31548	3.81629	2.20139
P04216	Thy-1 membrane glycoprotein OS=Homo sapiens OX=9606 GN=THY1 PE=1 SV=2	THY1	5.49436	0.000177965	Up	35	5	172	5	5	17.9	7.65815e+07	1.05476e+08	1.05553e+08	2.15984e+08	2.15085e+08	2.12732e+08	0.36158	0.546628	0.43543	2.41292	2.67558	2.29393
P09525	Annexin A4 OS=Homo sapiens OX=9606 GN=ANXA4 PE=1 SV=4	ANXA4	5.47294	3.62534e-06	Up	63	22	512	21	21	35.9	1.03818e+08	1.03326e+08	1.13319e+08	2.37232e+08	2.30447e+08	2.462e+08	0.445985	0.487204	0.425321	2.41135	2.60824	2.41546
O95292	Vesicle-associated membrane protein-associated protein B/C OS=Homo sapiens OX=9606 GN=VAPB PE=1 SV=3	VAPB	5.46109	0.000261127	Up	38	8	87	7	7	27.2	3.40384e+07	2.15625e+07	3.61989e+07	7.2466e+07	5.1812e+07	7.8764e+07	0.524249	0.364521	0.487112	2.64084	2.10245	2.77051
Q7L1W4	Volume-regulated anion channel subunit LRRC8D OS=Homo sapiens OX=9606 GN=LRRC8D PE=1 SV=1	LRRC8D	5.45436	0.000173479	Up	7	4	30	4	4	98.1	675654	625641	1.11821e+06	1.89271e+06	1.64982e+06	1.72277e+06	0.447758	0.455093	0.647451	2.96787	2.8806	2.60742
P21589	5'-nucleotidase OS=Homo sapiens OX=9606 GN=NT5E PE=1 SV=1	NT5E	5.41208	5.84822e-07	Up	64	29	590	29	29	63.3	1.87791e+08	1.77803e+08	2.29884e+08	4.26052e+08	4.1299e+08	4.65621e+08	0.453205	0.470993	0.484724	2.4329	2.62595	2.56636
P17050	Alpha-N-acetylgalactosaminidase OS=Homo sapiens OX=9606 GN=NAGA PE=1 SV=2	NAGA	5.39292	2.05447e-05	Up	21	7	44	7	7	46.5	1.27559e+07	1.31158e+07	1.87933e+07	3.29855e+07	2.97245e+07	3.44232e+07	0.443887	0.50097	0.571387	2.71598	2.72524	2.73576
O43290	U4/U6.U5 tri-snRNP-associated protein 1 OS=Homo sapiens OX=9606 GN=SART1 PE=1 SV=1	SART1	5.38421	4.31945e-05	Up	21	14	71	14	14	90.2	2.26208e+07	2.58318e+07	2.55354e+07	6.00858e+07	4.70903e+07	5.61959e+07	0.499568	0.626176	0.492713	3.13978	2.73997	2.83436
O43155	Leucine-rich repeat transmembrane protein FLRT2 OS=Homo sapiens OX=9606 GN=FLRT2 PE=1 SV=1	FLRT2	5.36582	0.000164515	Up	8	4	11	4	4	74	4.8199e+06	4.3779e+06	3.87002e+06	9.10793e+06	9.14418e+06	1.05733e+07	0.668144	0.666123	0.468717	2.9874	3.33968	3.34741
O95825	Quinone oxidoreductase-like protein 1 OS=Homo sapiens OX=9606 GN=CRYZL1 PE=1 SV=2	CRYZL1	5.32767	3.41191e-05	Up	37	9	45	9	9	38.7	1.16816e+07	8.89495e+06	1.3141e+07	2.54814e+07	1.9724e+07	2.76559e+07	0.593616	0.496139	0.583443	3.06386	2.64074	3.20965
P17301	Integrin alpha-2 OS=Homo sapiens OX=9606 GN=ITGA2 PE=1 SV=1	ITGA2	5.32356	4.22058e-06	Up	35	32	410	32	32	129.2	6.57929e+07	5.61851e+07	7.37349e+07	1.39452e+08	1.21701e+08	1.62406e+08	0.442286	0.414573	0.433074	2.21814	2.1555	2.49339
P18084	Integrin beta-5 OS=Homo sapiens OX=9606 GN=ITGB5 PE=1 SV=1	ITGB5	5.29796	1.83416e-05	Up	42	28	296	28	28	88	6.2897e+07	6.84069e+07	7.16595e+07	140268393	1.345e+08	1.6484e+08	0.427219	0.510007	0.425265	2.25435	2.40697	2.55711
P80723	Brain acid soluble protein 1 OS=Homo sapiens OX=9606 GN=BASP1 PE=1 SV=2	BASP1	5.24619	6.94835e-05	Up	63	10	121	10	10	22.7	2.42504e+07	2.64526e+07	2.70052e+07	6.05178e+07	4.39466e+07	6.3205e+07	0.41728	0.499612	0.405995	2.46395	1.99233	2.48385
P51828	Adenylate cyclase type 7 OS=Homo sapiens OX=9606 GN=ADCY7 PE=1 SV=1	ADCY7	5.23008	0.00138162	Up	3	2	15	2	2	120.2	262912	437182	580171	952351	863457	879033	0.310031	0.565864	0.597744	2.65725	2.68264	2.36736
P30520	Adenylosuccinate synthetase isozyme 2 OS=Homo sapiens OX=9606 GN=ADSS2 PE=1 SV=3	ADSS2	5.21914	8.03094e-05	Up	26	10	55	10	10	50.1	4.11869e+07	3.82667e+07	3.77369e+07	8.74406e+07	8.39719e+07	7.79926e+07	0.565292	0.576488	0.452527	2.83966	3.03651	2.44473
P32418	Sodium/calcium exchanger 1 OS=Homo sapiens OX=9606 GN=SLC8A1 PE=1 SV=3	SLC8A1	5.2126	0.0236831	Up	9	8	27	8	8	108.5	5.05004e+06	3.39922e+06	4.78326e+06	5.344e+06	1.6124e+07	5.44287e+06	0.566521	0.418558	0.468824	1.41849	4.76563	1.39449
P61225	Ras-related protein Rap-2b OS=Homo sapiens OX=9606 GN=RAP2B PE=1 SV=1	RAP2B	5.20139	9.28823e-06	Up	46	8	106	4	8	20.5	2.06157e+07	1.80671e+07	2.23922e+07	3.92208e+07	4.20975e+07	4.74746e+07	0.545782	0.525007	0.517945	2.45685	2.93633	2.87044
Q9UMS0	NFU1 iron-sulfur cluster scaffold homolog, mitochondrial OS=Homo sapiens OX=9606 GN=NFU1 PE=1 SV=2	NFU1	5.19631	2.48041e-05	Up	14	3	35	3	3	28.4	1.06508e+07	10771331	1.37256e+07	2.20979e+07	2.39084e+07	2.79431e+07	0.531156	0.58961	0.598047	2.60754	3.14136	3.18258
Q01968	Inositol polyphosphate 5-phosphatase OCRL OS=Homo sapiens OX=9606 GN=OCRL PE=1 SV=3	OCRL	5.16218	0.000361049	Up	14	10	37	10	10	104.1	2.14651e+07	2.66313e+07	2.63782e+07	6.11408e+07	5.14633e+07	4.39692e+07	0.464958	0.633182	0.499218	3.13367	2.93701	2.17517
Q9BUP3	Oxidoreductase HTATIP2 OS=Homo sapiens OX=9606 GN=HTATIP2 PE=1 SV=2	HTATIP2	5.13674	9.45394e-06	Up	35	7	45	7	7	27	8.20388e+06	7.34707e+06	8.99419e+06	18166821	1.39711e+07	1.93259e+07	0.602188	0.591947	0.576819	3.15524	2.7019	3.2398
O00499	Myc box-dependent-interacting protein 1 OS=Homo sapiens OX=9606 GN=BIN1 PE=1 SV=1	BIN1	5.13452	0.000199737	Up	28	11	63	11	11	64.7	1.99388e+07	1.78659e+07	2.23062e+07	5.106e+07	3.92224e+07	3.45815e+07	0.581059	0.571481	0.567951	3.52081	3.0115	2.3016
O43681	ATPase GET3 OS=Homo sapiens OX=9606 GN=GET3 PE=1 SV=2	GET3	5.12694	1.62822e-06	Up	41	11	132	11	11	38.8	6.84612e+07	5.56681e+07	7.75906e+07	1.40153e+08	1.2943e+08	1.48522e+08	0.53652	0.478855	0.53127	2.59888	2.67242	2.65825
P08758	Annexin A5 OS=Homo sapiens OX=9606 GN=ANXA5 PE=1 SV=2	ANXA5	5.12463	2.20407e-08	Up	83	30	2305	29	30	35.9	1.43244e+09	1.27555e+09	1.65721e+09	3.09928e+09	2.73353e+09	3.24031e+09	0.450821	0.440637	0.45569	2.30796	2.26662	2.32905
Q9HAV0	Guanine nucleotide-binding protein subunit beta-4 OS=Homo sapiens OX=9606 GN=GNB4 PE=1 SV=3	GNB4	5.12275	4.87689e-07	Up	70	15	250	9	15	37.5	1.20273e+08	1.04404e+08	1.37759e+08	2.45119e+08	2.36285e+08	2.70262e+08	0.55835	0.531997	0.558755	2.6925	2.89002	2.86541
P43007	Neutral amino acid transporter A OS=Homo sapiens OX=9606 GN=SLC1A4 PE=1 SV=1	SLC1A4	5.10568	0.00188135	Up	17	6	33	6	6	55.7	4.90127e+06	2.35767e+06	5.96501e+06	9.93067e+06	8.21946e+06	8.62284e+06	0.651199	0.343831	0.692439	3.12194	2.87724	2.6165
Q16270	Insulin-like growth factor-binding protein 7 OS=Homo sapiens OX=9606 GN=IGFBP7 PE=1 SV=1	IGFBP7	5.10097	2.18252e-06	Up	52	15	233	15	15	29.1	7.50872e+07	6.18569e+07	7.71623e+07	1.55349e+08	1.30589e+08	1.58334e+08	0.478647	0.432806	0.429754	2.34315	2.19322	2.30509
Q7Z3B1	Neuronal growth regulator 1 OS=Homo sapiens OX=9606 GN=NEGR1 PE=1 SV=3	NEGR1	5.09382	0.00717251	Up	9	3	41	3	3	38.7	1.76052e+06	1.99482e+06	1.90218e+06	4.31705e+06	5.08496e+06	2.17822e+06	0.318086	0.395606	0.300277	1.84558	2.42058	0.898817
P83731	60S ribosomal protein L24 OS=Homo sapiens OX=9606 GN=RPL24 PE=1 SV=1	RPL24	5.08337	1.28986e-05	Up	38	8	181	8	8	17.8	6.50919e+07	6.54003e+07	7.13422e+07	1.30184e+08	1.36577e+08	1.50966e+08	0.518247	0.571538	0.496274	2.4525	2.86494	2.74507
O75886	Signal transducing adapter molecule 2 OS=Homo sapiens OX=9606 GN=STAM2 PE=1 SV=1	STAM2	5.04837	3.88083e-06	Up	22	7	34	6	7	58.1	3.28636e+07	2.85681e+07	3.46051e+07	6.25464e+07	6.43051e+07	6.98074e+07	0.569583	0.543474	0.524019	2.56499	2.9364	2.76318
Q9NQ88	Fructose-2,6-bisphosphatase TIGAR OS=Homo sapiens OX=9606 GN=TIGAR PE=1 SV=1	TIGAR	5.04456	7.59641e-06	Up	17	4	17	4	4	30	7.7185e+06	7.8717e+06	8.93632e+06	1.6568e+07	1.67039e+07	1.6944e+07	0.483762	0.54153	0.489353	2.45703	2.75832	2.42537
Q9GZL7	Ribosome biogenesis protein WDR12 OS=Homo sapiens OX=9606 GN=WDR12 PE=1 SV=2	WDR12	5.0424	0.00029625	Up	32	11	59	11	11	47.7	2.05604e+07	1.77139e+07	2.4776e+07	55949540	3.31033e+07	3.99619e+07	0.582351	0.550711	0.613124	3.74964	2.47031	2.58502
P31641	Sodium- and chloride-dependent taurine transporter OS=Homo sapiens OX=9606 GN=SLC6A6 PE=1 SV=2	SLC6A6	5.04052	0.00470513	Up	3	2	3	2	2	69.8		164458	242212	444752		404680		0.308185	0.361292	1.79663		1.57789
Q9H3N1	Thioredoxin-related transmembrane protein 1 OS=Homo sapiens OX=9606 GN=TMX1 PE=1 SV=1	TMX1	5.02991	1.33678e-05	Up	26	10	128	10	10	31.8	6.55181e+07	5.99188e+07	6.28324e+07	1.2864e+08	1.23059e+08	1.34811e+08	0.585267	0.587505	0.49039	2.71901	2.89622	2.75032
O60613	Selenoprotein F OS=Homo sapiens OX=9606 GN=SELENOF PE=1 SV=4	SELENOF	5.00029	1.06936e-05	Up	21	3	48	3	3	18.1	8.76107e+06	8.17369e+06	9.34572e+06	1.94568e+07	1.47628e+07	1.95135e+07	0.50838	0.520601	0.473815	2.67142	2.25698	2.58601
P50416	Carnitine O-palmitoyltransferase 1, liver isoform OS=Homo sapiens OX=9606 GN=CPT1A PE=1 SV=2	CPT1A	4.97454	6.6088e-06	Up	43	30	360	30	30	88.3	1.11131e+08	9.80804e+07	112861244	2.39305e+08	1.94313e+08	2.1924e+08	0.613223	0.594046	0.544116	3.12446	2.82496	2.76291
Q53H96	Pyrroline-5-carboxylate reductase 3 OS=Homo sapiens OX=9606 GN=PYCR3 PE=1 SV=3	PYCR3	4.97014	0.000529514	Up	35	7	48	7	7	28.6	1.43761e+07	1.46998e+07	2.06117e+07	3.75128e+07	3.52931e+07	2.60098e+07	0.465391	0.52233	0.582985	2.87342	3.0102	1.923
P08648	Integrin alpha-5 OS=Homo sapiens OX=9606 GN=ITGA5 PE=1 SV=2	ITGA5	4.94367	6.54044e-07	Up	35	26	427	26	26	114.5	1.12072e+08	1.06392e+08	1.31641e+08	2.41072e+08	2.2408e+08	2.36081e+08	0.555626	0.578962	0.570218	2.82796	2.92695	2.67308
O14807	Ras-related protein M-Ras OS=Homo sapiens OX=9606 GN=MRAS PE=1 SV=2	MRAS	4.94158	7.30536e-05	Up	19	4	12	4	4	23.8	1.63216e+06	1.20949e+06	1.92279e+06	3.08815e+06	2.67895e+06	3.74905e+06	0.65573	0.533357	0.67493	2.93562	2.83565	3.43992
P01024	Complement C3 OS=Homo sapiens OX=9606 GN=C3 PE=1 SV=2	C3	4.91882	7.16067e-06	Up	33	43	282	35	35	187	4.5667e+07	4.66315e+07	5.00267e+07	9.63207e+07	8.43988e+07	1.05575e+08	0.473764	0.530999	0.453446	2.36439	2.30687	2.50141
O75326	Semaphorin-7A OS=Homo sapiens OX=9606 GN=SEMA7A PE=1 SV=1	SEMA7A	4.91562	0.00165835	Up	17	7	39	7	7	74.8	5.83432e+06	5.81743e+06	8.16649e+06	9.86423e+06	1.02379e+07	1.9628e+07	0.497153	0.54411	0.607995	1.98886	2.29846	3.8198
Q8N0X7	Spartin OS=Homo sapiens OX=9606 GN=SPART PE=1 SV=1	SPART	4.90874	8.63818e-06	Up	15	8	60	8	8	72.8	1.48533e+07	1.35678e+07	1.63731e+07	3.16338e+07	2.91306e+07	2.83012e+07	0.588685	0.590236	0.566964	2.96655	3.04184	2.5617
P08727	Keratin, type I cytoskeletal 19 OS=Homo sapiens OX=9606 GN=KRT19 PE=1 SV=4	KRT19	4.88726	7.88911e-07	Up	48	22	389	15	19	44.1	1.77004e+08	1.50374e+08	1.97134e+08	3.64987e+08	3.21902e+08	3.51064e+08	0.586911	0.547291	0.571105	2.86357	2.81217	2.65853
Q8IYB8	ATP-dependent RNA helicase SUPV3L1, mitochondrial OS=Homo sapiens OX=9606 GN=SUPV3L1 PE=1 SV=1	SUPV3L1	4.88114	2.56447e-06	Up	15	8	27	8	8	87.9	2.38599e+07	2.10561e+07	2.69009e+07	4.98622e+07	4.01834e+07	5.26075e+07	0.522312	0.505935	0.514509	2.5827	2.31759	2.63011
P05556	Integrin beta-1 OS=Homo sapiens OX=9606 GN=ITGB1 PE=1 SV=2	ITGB1	4.88093	7.49269e-07	Up	50	41	1262	41	41	88.4	4.8616e+08	4.29845e+08	5.23983e+08	9.53773e+08	8.49318e+08	1.05781e+09	0.491221	0.476723	0.462573	2.28026	2.26098	2.44101
P27105	Stomatin OS=Homo sapiens OX=9606 GN=STOM PE=1 SV=3	STOM	4.86878	0.000369613	Up	43	9	104	9	9	31.7	2.03507e+07	1.28174e+07	1.48703e+07	3.17972e+07	3.14663e+07	3.18311e+07	0.464701	0.321254	0.296673	1.718	1.89307	1.66001
Q658P3	Metalloreductase STEAP3 OS=Homo sapiens OX=9606 GN=STEAP3 PE=1 SV=2	STEAP3	4.8569	0.00043027	Up	13	5	51	5	5	54.6	4866389	3.01258e+06	3.64001e+06	7930706	7.6194e+06	7.13818e+06	0.769286	0.522728	0.502746	2.96643	3.17343	2.57711
P40222	Alpha-taxilin OS=Homo sapiens OX=9606 GN=TXLNA PE=1 SV=3	TXLNA	4.84234	0.000569052	Up	37	16	114	16	16	61.9	3.38419e+07	3.65189e+07	4.22684e+07	8.85699e+07	7.46792e+07	5.71314e+07	0.574517	0.680488	0.626943	3.55774	3.34022	2.21507
P26006	Integrin alpha-3 OS=Homo sapiens OX=9606 GN=ITGA3 PE=1 SV=5	ITGA3	4.83526	1.80982e-05	Up	24	18	268	18	18	116.5	4.68632e+07	4.1429e+07	6.03385e+07	1.00564e+08	9.50838e+07	9.32268e+07	0.576547	0.559451	0.648577	2.92743	3.08203	2.61944
Q5QJ74	Tubulin-specific chaperone cofactor E-like protein OS=Homo sapiens OX=9606 GN=TBCEL PE=1 SV=2	TBCEL	4.82941	1.04185e-05	Up	18	6	37	6	6	48.2	4.34063e+06	3.80606e+06	4.22908e+06	8.54299e+06	7.69983e+06	8.09266e+06	0.516045	0.496668	0.439285	2.40318	2.41181	2.19731
Q9UPY5	Cystine/glutamate transporter OS=Homo sapiens OX=9606 GN=SLC7A11 PE=1 SV=1	SLC7A11	4.78022	6.76087e-06	Up	6	3	19	3	3	55.4	1.61826e+06	1.49176e+06	2.12206e+06	3.5803e+06	2.93542e+06	3.59927e+06	0.642044	0.649635	0.735594	3.36106	3.06842	3.26134
P62424	60S ribosomal protein L7a OS=Homo sapiens OX=9606 GN=RPL7A PE=1 SV=2	RPL7A	4.7751	4.00906e-05	Up	55	19	490	19	19	30	1.77843e+08	1.66643e+08	1.63414e+08	3.34421e+08	3.14468e+08	3.43545e+08	0.606358	0.623639	0.486793	2.6979	2.82485	2.6751
Q15043	Metal cation symporter ZIP14 OS=Homo sapiens OX=9606 GN=SLC39A14 PE=1 SV=3	SLC39A14	4.75521	3.03307e-06	Up	20	7	85	7	7	54.2	1.42721e+07	1.29074e+07	1.80681e+07	29113665	2.78171e+07	29830203	0.570612	0.566433	0.631146	2.75417	2.93017	2.72379
Q86XZ4	Spermatogenesis-associated serine-rich protein 2 OS=Homo sapiens OX=9606 GN=SPATS2 PE=1 SV=1	SPATS2	4.73699	0.000276207	Up	9	5	33	5	5	59.5	5.52851e+06	4.59967e+06	5.68416e+06	8.94718e+06	8.16558e+06	1.35498e+07	0.582773	0.532198	0.523506	2.23161	2.2678	3.26205
P48509	CD151 antigen OS=Homo sapiens OX=9606 GN=CD151 PE=1 SV=3	CD151	4.73566	7.54819e-06	Up	34	11	122	11	11	28.3	5.06484e+07	5.37433e+07	61269842	1.05972e+08	1.03156e+08	1.09549e+08	0.580586	0.676209	0.613638	2.87429	3.11548	2.86797
O75131	Copine-3 OS=Homo sapiens OX=9606 GN=CPNE3 PE=1 SV=1	CPNE3	4.71814	5.24433e-05	Up	47	22	311	21	22	60.1	1.23425e+08	9.7598e+07	1.31692e+08	2.22147e+08	2.35968e+08	2.11621e+08	0.623563	0.541221	0.581302	2.65558	3.14094	2.44176
O43570	Carbonic anhydrase 12 OS=Homo sapiens OX=9606 GN=CA12 PE=1 SV=1	CA12	4.71681	1.46458e-07	Up	12	3	14	3	3	39.4	1.49883e+06	1.40952e+06	1.68133e+06	3.065e+06	2.69152e+06	3.04427e+06	0.526549	0.54352	0.516066	2.54776	2.49122	2.44251
Q5T3F8	CSC1-like protein 2 OS=Homo sapiens OX=9606 GN=TMEM63B PE=1 SV=1	TMEM63B	4.68414	0.000162082	Up	5	3	5	3	3	94.9	283952	260712		511718	544480	595680	0.464984	0.468608		1.98273	2.3491	2.22777
P53985	Monocarboxylate transporter 1 OS=Homo sapiens OX=9606 GN=SLC16A1 PE=1 SV=3	SLC16A1	4.68037	2.06827e-06	Up	10	5	46	5	5	53.9	9.95873e+06	8.9374e+06	1.08236e+07	1.79949e+07	1.80515e+07	2.04248e+07	0.515361	0.507663	0.489379	2.20343	2.46121	2.41396
Q12965	Unconventional myosin-Ie OS=Homo sapiens OX=9606 GN=MYO1E PE=1 SV=2	MYO1E	4.67309	9.21759e-06	Up	17	17	90	16	16	127	1.53512e+07	1.30183e+07	1.78911e+07	3.18865e+07	2.72346e+07	2.81797e+07	0.555435	0.517013	0.565576	2.72984	2.5962	2.32858
Q7L1Q6	Basic leucine zipper and W2 domain-containing protein 1 OS=Homo sapiens OX=9606 GN=BZW1 PE=1 SV=1	BZW1	4.67109	3.24004e-05	Up	35	18	230	16	18	48	6.2903e+07	6.99636e+07	8.46195e+07	1.42285e+08	1.16311e+08	1.55341e+08	0.505519	0.617154	0.594156	2.70562	2.46272	2.85113
P56199	Integrin alpha-1 OS=Homo sapiens OX=9606 GN=ITGA1 PE=1 SV=2	ITGA1	4.64292	9.03966e-06	Up	25	29	412	29	29	130.8	1.10113e+08	8.61499e+07	1.24957e+08	2.13513e+08	1.77912e+08	2.11589e+08	0.515135	0.442377	0.51075	2.36345	2.19288	2.26069
Q9BRJ2	39S ribosomal protein L45, mitochondrial OS=Homo sapiens OX=9606 GN=MRPL45 PE=1 SV=2	MRPL45	4.62973	8.47086e-07	Up	49	11	76	11	11	35.3	1.55903e+07	1.50075e+07	1.81794e+07	2.98348e+07	2.91833e+07	3.26191e+07	0.592306	0.625827	0.603443	2.68197	2.92115	2.83027
P63218	Guanine nucleotide-binding protein G(I)/G(S)/G(O) subunit gamma-5 OS=Homo sapiens OX=9606 GN=GNG5 PE=1 SV=3	GNG5	4.61372	0.00024704	Up	63	3	26	3	3	7.3	8.89445e+06	8977497	1.48038e+07	21331327	1.97853e+07	19079099	0.547768	0.60686	0.796553	3.10839	3.21032	2.68349
Q9UHN6	Cell surface hyaluronidase OS=Homo sapiens OX=9606 GN=CEMIP2 PE=1 SV=1	CEMIP2	4.60031	1.23721e-06	Up	24	28	238	28	28	154.3	2.28342e+07	2.17332e+07	2.59229e+07	4.57921e+07	4.18056e+07	4.39972e+07	0.560249	0.585295	0.555704	2.65844	2.70244	2.46539
Q13325	Interferon-induced protein with tetratricopeptide repeats 5 OS=Homo sapiens OX=9606 GN=IFIT5 PE=1 SV=1	IFIT5	4.59493	0.000279725	Up	39	15	135	14	14	55.8	3.71826e+07	2.96235e+07	3.62048e+07	7.61842e+07	4.64115e+07	7.13996e+07	0.64692	0.565722	0.550354	3.13629	2.12748	2.83708
O75084	Frizzled-7 OS=Homo sapiens OX=9606 GN=FZD7 PE=1 SV=2	FZD7	4.58641	2.88789e-05	Up	10	7	75	4	7	63.6	4.48584e+06	4.67709e+06	4.91556e+06	8.6133e+06	8.85369e+06	8.80527e+06	0.438736	0.5021	0.420046	1.99328	2.28145	1.96683
P50897	Palmitoyl-protein thioesterase 1 OS=Homo sapiens OX=9606 GN=PPT1 PE=1 SV=1	PPT1	4.57824	0.000744161	Up	26	6	25	6	6	34.2	5.93372e+06	3.72932e+06	7.92083e+06	1.04059e+07	1.09475e+07	10563514	0.600781	0.414452	0.700688	2.49292	2.92032	2.44266
O60427	Acyl-CoA (8-3)-desaturase OS=Homo sapiens OX=9606 GN=FADS1 PE=1 SV=3	FADS1	4.57174	0.000287507	Up	20	6	23	6	6	51.9	2.10553e+06	1.53982e+06	1.75785e+06	3.7624e+06	2.57017e+06	3.80952e+06	0.619292	0.497118	0.451732	2.61843	1.9917	2.559
P50542	Peroxisomal targeting signal 1 receptor OS=Homo sapiens OX=9606 GN=PEX5 PE=1 SV=3	PEX5	4.54544	0.000131563	Up	11	5	34	5	5	70.8	1.85112e+06	2.06474e+06	2.13996e+06	3420454	4.00711e+06	3.74959e+06	0.496266	0.607575	0.501246	2.16972	2.83034	2.29577
Q03405	Urokinase plasminogen activator surface receptor OS=Homo sapiens OX=9606 GN=PLAUR PE=1 SV=1	PLAUR	4.53873	0.000127991	Up	38	8	113	8	8	37	2.04924e+07	1.46846e+07	2.22064e+07	3.81227e+07	2.76057e+07	3.99721e+07	0.500021	0.39329	0.473412	2.201	1.77469	2.2275
P53396	ATP-citrate synthase OS=Homo sapiens OX=9606 GN=ACLY PE=1 SV=3	ACLY	4.52557	1.37389e-05	Up	55	52	798	52	52	120.8	5.18033e+08	5.11093e+08	5.94126e+08	1.12719e+09	8.79233e+08	9.84652e+08	0.60421	0.654314	0.605444	3.11078	2.70186	2.62288
P46782	40S ribosomal protein S5 OS=Homo sapiens OX=9606 GN=RPS5 PE=1 SV=4	RPS5	4.52234	3.70577e-05	Up	43	9	182	9	9	22.9	7.08492e+07	6.52363e+07	7.96007e+07	1.20709e+08	139306617	1.3403e+08	0.557326	0.563273	0.547086	2.24674	2.88718	2.40791
P16070	CD44 antigen OS=Homo sapiens OX=9606 GN=CD44 PE=1 SV=3	CD44	4.5183	4.02333e-05	Up	11	8	246	8	8	81.5	2.23134e+08	2.55171e+08	2.54603e+08	4.67507e+08	4.20425e+08	4.66277e+08	0.589891	0.740443	0.588075	2.92438	2.92834	2.81523
Q9Y639	Neuroplastin OS=Homo sapiens OX=9606 GN=NPTN PE=1 SV=2	NPTN	4.50031	3.2326e-06	Up	23	9	175	9	9	44.4	3.65904e+07	3.56059e+07	4.05335e+07	7.05833e+07	6.63152e+07	6.92674e+07	0.504165	0.538497	0.48796	2.30117	2.40739	2.17971
P35613	Basigin OS=Homo sapiens OX=9606 GN=BSG PE=1 SV=2	BSG	4.49166	5.3745e-07	Up	31	9	251	9	9	42.2	7.04843e+07	6.57505e+07	8.25099e+07	1.42006e+08	1.21518e+08	1.3503e+08	0.526092	0.538671	0.538071	2.50793	2.38968	2.30179
P0CW19	LIM and senescent cell antigen-like-containing domain protein 3 OS=Homo sapiens OX=9606 GN=LIMS3 PE=2 SV=1	LIMS3	4.48725	0.00122409	Up	31	3	9	3	3	13.2	503525	668634	1.08165e+06	1.47165e+06	1.25005e+06	1.32134e+06	0.244853	0.356886	0.459553	1.69328	1.60154	1.46746
Q12791	Calcium-activated potassium channel subunit alpha-1 OS=Homo sapiens OX=9606 GN=KCNMA1 PE=1 SV=2	KCNMA1	4.485	2.14704e-05	Up	7	6	34	6	6	137.5	3.76636e+06	3.26914e+06	5.08432e+06	7.55504e+06	6.53962e+06	7.79518e+06	0.59991	0.571549	0.707558	2.84735	2.74438	2.83567
Q14160	Protein scribble homolog OS=Homo sapiens OX=9606 GN=SCRIB PE=1 SV=4	SCRIB	4.48145	0.000303536	Up	5	7	37	6	7	174.8	4.43381e+06	3.44284e+06	4.71126e+06	7.44458e+06	5.71076e+06	9.89165e+06	0.665519	0.567227	0.617854	2.64402	2.25842	3.39092
P46779	60S ribosomal protein L28 OS=Homo sapiens OX=9606 GN=RPL28 PE=1 SV=3	RPL28	4.47959	0.000149888	Up	43	7	165	7	7	15.7	7.87186e+07	1.00007e+08	1.18949e+08	184557508	1.74666e+08	1.80848e+08	0.47109	0.65692	0.621944	2.61336	2.75398	2.47175
P19367	Hexokinase-1 OS=Homo sapiens OX=9606 GN=HK1 PE=1 SV=3	HK1	4.4793	1.04636e-07	Up	48	38	677	34	40	102.4	2.92184e+08	2.70985e+08	3.23394e+08	5.5147e+08	4.86653e+08	5.77849e+08	0.587857	0.598435	0.568476	2.62529	2.57966	2.65518
Q9NUQ6	SPATS2-like protein OS=Homo sapiens OX=9606 GN=SPATS2L PE=1 SV=2	SPATS2L	4.47003	2.51311e-05	Up	39	16	129	16	16	61.7	4.26982e+07	4.05105e+07	5.76259e+07	8.80706e+07	8.31743e+07	8.19484e+07	0.536861	0.559082	0.633046	2.62014	2.7553	2.3532
Q9BYN0	Sulfiredoxin-1 OS=Homo sapiens OX=9606 GN=SRXN1 PE=1 SV=2	SRXN1	4.46684	5.33891e-05	Up	20	3	14	3	3	14.3	1.00493e+07	1.18923e+07	1.23514e+07	2.05909e+07	2.01668e+07	2.16938e+07	0.464983	0.60398	0.499323	2.25433	2.45848	2.29246
Q8IWA5	Choline transporter-like protein 2 OS=Homo sapiens OX=9606 GN=SLC44A2 PE=1 SV=3	SLC44A2	4.45815	3.01947e-05	Up	17	13	118	12	12	80.1	1.25133e+07	1.3725e+07	1.39391e+07	2.53547e+07	2.31512e+07	2.46313e+07	0.522146	0.628619	0.50818	2.50333	2.54519	2.34731
P29144	Tripeptidyl-peptidase 2 OS=Homo sapiens OX=9606 GN=TPP2 PE=1 SV=4	TPP2	4.45438	5.05093e-05	Up	33	32	303	32	32	138.3	7.67745e+07	6.99662e+07	9.23133e+07	1.54837e+08	144697822	1.2949e+08	0.58216	0.582331	0.611582	2.77805	2.89078	2.24246
O15231	Zinc finger protein 185 OS=Homo sapiens OX=9606 GN=ZNF185 PE=1 SV=3	ZNF185	4.45425	8.39741e-05	Up	8	5	15	5	5	73.5	5.58408e+06	4.51103e+06	6.22537e+06	1.08355e+07	9.71806e+06	8.71897e+06	0.687599	0.609698	0.669752	3.157	3.15276	2.45196
Q9NRY6	Phospholipid scramblase 3 OS=Homo sapiens OX=9606 GN=PLSCR3 PE=1 SV=2	PLSCR3	4.44795	1.96119e-06	Up	38	7	47	7	7	31.6	6.47273e+06	6.51591e+06	7.70562e+06	12992592	1.17151e+07	1.26717e+07	0.511002	0.564632	0.531505	2.42701	2.43674	2.28473
Q9Y6M7	Sodium bicarbonate cotransporter 3 OS=Homo sapiens OX=9606 GN=SLC4A7 PE=1 SV=2	SLC4A7	4.44009	0.00276851	Up	10	9	55	9	9	136	2.38391e+06	1.44883e+06	3.89968e+06	3.94208e+06	4.38733e+06	5.20493e+06	0.543824	0.362779	0.777252	2.12782	2.63691	2.71174
Q9HD15	Steroid receptor RNA activator 1 OS=Homo sapiens OX=9606 GN=SRA1 PE=1 SV=1	SRA1	4.43465	2.18248e-06	Up	36	6	36	6	6	25.7	1.35164e+07	1.13048e+07	1.50345e+07	2.54231e+07	2.20728e+07	2.40432e+07	0.683244	0.627243	0.664003	3.04078	2.93968	2.77571
Q96IX5	ATP synthase membrane subunit K, mitochondrial OS=Homo sapiens OX=9606 GN=ATP5MK PE=1 SV=1	ATP5MK	4.41912	0.000139936	Up	47	3	37	3	3	6.5	14131753	1.36185e+07	1.71305e+07	3.05873e+07	2.64929e+07	2.29762e+07	0.539619	0.570788	0.571512	2.76359	2.66531	2.0037
O75534	Cold shock domain-containing protein E1 OS=Homo sapiens OX=9606 GN=CSDE1 PE=1 SV=2	CSDE1	4.41493	6.08406e-07	Up	27	22	201	22	22	88.8	6.83604e+07	5.92166e+07	7.27823e+07	1.21379e+08	1.13378e+08	1.24177e+08	0.636392	0.605089	0.591985	2.67364	2.78085	2.64013
P20020	Plasma membrane calcium-transporting ATPase 1 OS=Homo sapiens OX=9606 GN=ATP2B1 PE=1 SV=4	ATP2B1	4.40559	3.952e-07	Up	31	30	417	16	17	134.6	4.94307e+07	4.60389e+07	5.75596e+07	9.17672e+07	8.75489e+07	9.37729e+07	0.536082	0.548044	0.545403	2.35485	2.50157	2.32261
O95772	STARD3 N-terminal-like protein OS=Homo sapiens OX=9606 GN=STARD3NL PE=1 SV=1	STARD3NL	4.39672	2.07473e-05	Up	13	3	19	3	3	26.6	1.86136e+07	1.79046e+07	2.15857e+07	3.30425e+07	2.98418e+07	4.1316e+07	0.630818	0.66603	0.639152	2.64964	2.66456	3.19785
P35555	Fibrillin-1 OS=Homo sapiens OX=9606 GN=FBN1 PE=1 SV=4	FBN1	4.37719	1.46504e-05	Up	21	49	417	47	49	312.1	2.15333e+08	2.07474e+08	2.97602e+08	4.41525e+08	3.75752e+08	4.56607e+08	0.481454	0.509172	0.581362	2.33583	2.21347	2.33159
Q14344	Guanine nucleotide-binding protein subunit alpha-13 OS=Homo sapiens OX=9606 GN=GNA13 PE=1 SV=2	GNA13	4.37239	2.22131e-06	Up	46	16	185	14	16	44	1.82575e+07	1.82248e+07	2.08231e+07	3.49727e+07	3.01259e+07	3.70956e+07	0.521815	0.571735	0.519979	2.36508	2.26852	2.42138
O15031	Plexin-B2 OS=Homo sapiens OX=9606 GN=PLXNB2 PE=1 SV=3	PLXNB2	4.35478	1.53114e-06	Up	33	46	469	45	46	205	5.32262e+07	4.77312e+07	6.27193e+07	9.41888e+07	9.36316e+07	1.00279e+08	0.507347	0.499388	0.522331	2.12432	2.35142	2.18301
P08133	Annexin A6 OS=Homo sapiens OX=9606 GN=ANXA6 PE=1 SV=3	ANXA6	4.34513	1.60185e-07	Up	72	53	2775	53	53	75.8	1.4661e+09	1.39507e+09	1.70357e+09	2.74389e+09	2.5258e+09	2.77787e+09	0.499396	0.521594	0.506998	2.21151	2.26677	2.16102
Q07666	KH domain-containing, RNA-binding, signal transduction-associated protein 1 OS=Homo sapiens OX=9606 GN=KHDRBS1 PE=1 SV=1	KHDRBS1	4.34057	0.000377177	Up	25	7	69	6	7	48.2	7.15108e+07	6.9126e+07	9.13004e+07	1.07825e+08	1.49699e+08	1.47316e+08	0.624198	0.662289	0.696287	2.22694	3.44268	2.93674
O60716	Catenin delta-1 OS=Homo sapiens OX=9606 GN=CTNND1 PE=1 SV=1	CTNND1	4.34038	5.28177e-06	Up	43	34	468	34	34	108.1	8.6173e+07	7.97613e+07	1.10663e+08	1.56526e+08	1.52673e+08	1.75612e+08	0.575851	0.585042	0.646112	2.47494	2.688	2.68015
P04083	Annexin A1 OS=Homo sapiens OX=9606 GN=ANXA1 PE=1 SV=2	ANXA1	4.33946	1.38158e-06	Up	77	29	998	29	29	38.7	9.83061e+08	9.20957e+08	1.10164e+09	1.79773e+09	1.7085e+09	1.78398e+09	0.636705	0.654716	0.623395	2.75501	2.91542	2.63884
Q8ND76	Cyclin-Y OS=Homo sapiens OX=9606 GN=CCNY PE=1 SV=2	CCNY	4.31755	0.000292587	Up	13	4	29	2	2	39.3	1.41634e+06	1.00888e+06	1.15257e+06	2.10915e+06	1.70785e+06	2.51941e+06	0.617508	0.482805	0.439044	2.17582	1.96178	2.50864
Q9UBU6	Protein FAM8A1 OS=Homo sapiens OX=9606 GN=FAM8A1 PE=1 SV=1	FAM8A1	4.31047	0.0209881	Up	7	2	9	2	2	44.1	645654	2.46116e+06	1.97389e+06	2.56021e+06	2.69132e+06	3.815e+06	0.201886	0.844701	0.539256	1.89419	2.21717	2.72437
P04899	Guanine nucleotide-binding protein G(i) subunit alpha-2 OS=Homo sapiens OX=9606 GN=GNAI2 PE=1 SV=3	GNAI2	4.26674	7.29861e-06	Up	61	17	535	10	18	40.4	2.55268e+08	2.19985e+08	2.48741e+08	4.38148e+08	3.80292e+08	4.41375e+08	0.660644	0.624912	0.562448	2.68307	2.59307	2.60882
Q9BYX2	TBC1 domain family member 2A OS=Homo sapiens OX=9606 GN=TBC1D2 PE=1 SV=3	TBC1D2	4.26342	0.000242789	Up	8	6	19	6	6	105.3	6.47482e+06	6.51823e+06	7.22651e+06	1.31455e+07	1.19255e+07	9.85288e+06	0.715811	0.790962	0.698013	3.43866	3.47357	2.4877
P50281	Matrix metalloproteinase-14 OS=Homo sapiens OX=9606 GN=MMP14 PE=1 SV=3	MMP14	4.24407	1.89075e-06	Up	29	15	284	15	15	65.9	5.06314e+07	4.24045e+07	5.59573e+07	8.86652e+07	7.47662e+07	9.33232e+07	0.396531	0.364523	0.382894	1.64305	1.54273	1.66921
Q9Y5R8	Trafficking protein particle complex subunit 1 OS=Homo sapiens OX=9606 GN=TRAPPC1 PE=1 SV=1	TRAPPC1	4.2242	5.55103e-05	Up	14	2	8	2	2	16.8	6.20925e+06	6.00315e+06	8.7114e+06	1.09326e+07	1.12474e+07	1.34481e+07	0.566277	0.600931	0.694133	2.35914	2.70252	2.80102
Q9UKX5	Integrin alpha-11 OS=Homo sapiens OX=9606 GN=ITGA11 PE=1 SV=2	ITGA11	4.21808	1.08806e-06	Up	31	31	289	31	31	133.4	2.43349e+07	2.01104e+07	2.59381e+07	4.11196e+07	3.64487e+07	4.29196e+07	0.344504	0.312493	0.320824	1.37738	1.35948	1.38767
Q9HCU0	Endosialin OS=Homo sapiens OX=9606 GN=CD248 PE=1 SV=1	CD248	4.20327	3.1511e-05	Up	26	14	150	14	14	80.8	2.04706e+07	1.68427e+07	1.8709e+07	3.12572e+07	3.03377e+07	3.44015e+07	0.581863	0.525481	0.464627	2.10224	2.27196	2.23322
P05026	Sodium/potassium-transporting ATPase subunit beta-1 OS=Homo sapiens OX=9606 GN=ATP1B1 PE=1 SV=1	ATP1B1	4.19726	2.73893e-05	Up	27	6	52	6	6	35	5.20531e+06	5.83483e+06	6.62782e+06	9.72411e+06	9.33855e+06	1.11312e+07	0.423758	0.521381	0.471419	1.87311	2.00299	2.06957
Q8IVT5	Kinase suppressor of Ras 1 OS=Homo sapiens OX=9606 GN=KSR1 PE=1 SV=3	KSR1	4.17803	0.000131682	Up	7	5	20	5	5	102.1	2.38762e+06	2.31402e+06	3.47698e+06	4.28195e+06	4.00071e+06	5.5203e+06	0.566928	0.603097	0.721324	2.40572	2.50281	2.99358
P84098	60S ribosomal protein L19 OS=Homo sapiens OX=9606 GN=RPL19 PE=1 SV=1	RPL19	4.16483	2.39276e-06	Up	32	8	241	8	8	23.5	1.38153e+08	1.1996e+08	1.41335e+08	2.27081e+08	2.1361e+08	2.35556e+08	0.658978	0.62806	0.589014	2.56289	2.68447	2.56607
Q9UNX3	60S ribosomal protein L26-like 1 OS=Homo sapiens OX=9606 GN=RPL26L1 PE=1 SV=1	RPL26L1	4.15887	0.00139212	Up	49	11	214	2	2	17.2	1.04525e+07	9.96711e+06	8.11782e+06	1.5879e+07	1.84054e+07	14187551	0.748299	0.783215	0.507762	2.68981	3.4716	2.31968
Q8N556	Actin filament-associated protein 1 OS=Homo sapiens OX=9606 GN=AFAP1 PE=1 SV=2	AFAP1	4.15502	0.00132758	Up	11	7	56	7	7	80.7	1.73571e+07	1.14167e+07	1.85263e+07	2.17367e+07	2.15871e+07	3.64016e+07	0.734386	0.530203	0.684859	2.17611	2.4064	3.51748
Q9UIW2	Plexin-A1 OS=Homo sapiens OX=9606 GN=PLXNA1 PE=1 SV=3	PLXNA1	4.14557	8.59851e-05	Up	17	29	151	20	28	210.9	1.94327e+07	1.42474e+07	1.99497e+07	3.23441e+07	2.42452e+07	3.38196e+07	0.650744	0.523684	0.583686	2.56279	2.1391	2.58649
O00478	Butyrophilin subfamily 3 member A3 OS=Homo sapiens OX=9606 GN=BTN3A3 PE=1 SV=1	BTN3A3	4.14311	7.01955e-05	Up	13	6	59	6	6	65	2.69937e+06	2.30875e+06	3413613	4.68692e+06	3.84413e+06	5.61421e+06	0.410361	0.385244	0.453401	1.6859	1.53967	1.9492
Q15785	Mitochondrial import receptor subunit TOM34 OS=Homo sapiens OX=9606 GN=TOMM34 PE=1 SV=2	TOMM34	4.14078	0.000155505	Up	23	7	24	7	7	34.5	4.53481e+06	5.65132e+06	6.12988e+06	1.01099e+07	7.68778e+06	9.83586e+06	0.547239	0.748555	0.646301	2.88674	2.44426	2.71079
Q9HCJ1	Progressive ankylosis protein homolog OS=Homo sapiens OX=9606 GN=ANKH PE=1 SV=2	ANKH	4.13935	1.11877e-05	Up	8	4	23	4	4	54.2	1404643	1.4199e+06	1.69622e+06	2.75608e+06	2.13953e+06	2.73306e+06	0.591587	0.656398	0.624165	2.74654	2.3741	2.62885
O95714	E3 ubiquitin-protein ligase HERC2 OS=Homo sapiens OX=9606 GN=HERC2 PE=1 SV=2	HERC2	4.13378	0.0360997	Up	1	2	7	2	2	526.9	124348		153208	258157	106711	310476	0.619875		0.667285	3.045	1.40152	3.53473
Q5JWF2	Guanine nucleotide-binding protein G(s) subunit alpha isoforms XLas OS=Homo sapiens OX=9606 GN=GNAS PE=1 SV=2	GNAS	4.12503	8.95183e-07	Up	16	15	247	14	14	111	3.6015e+07	3.0168e+07	3.92486e+07	5.85918e+07	5.51199e+07	6.25053e+07	0.557529	0.512609	0.530852	2.14616	2.24812	2.20986
P01137	Transforming growth factor beta-1 proprotein OS=Homo sapiens OX=9606 GN=TGFB1 PE=1 SV=2	TGFB1	4.10935	0.0126224	Up	13	4	10	4	4	44.3	1.08636e+06	746691	442430	1.21612e+06	1.55157e+06	1.07507e+06	0.785357	0.592503	0.279449	2.08023	2.95523	1.77499
O15027	Protein transport protein Sec16A OS=Homo sapiens OX=9606 GN=SEC16A PE=1 SV=4	SEC16A	4.0985	2.27881e-05	Up	30	41	216	41	41	251.7	1.07763e+08	9.303e+07	1.16075e+08	1.59297e+08	1.73242e+08	1.93739e+08	0.649786	0.615713	0.611509	2.27273	2.75221	2.66798
Q4V9L6	Transmembrane protein 119 OS=Homo sapiens OX=9606 GN=TMEM119 PE=1 SV=1	TMEM119	4.09677	0.00732809	Up	15	4	35	4	4	29.2	4.02522e+06	7.99663e+06	4.06097e+06	9.81832e+06	9.47638e+06	8.22571e+06	0.423267	0.92297	0.373095	2.44288	2.6254	1.97544
Q8N5C1	Calcium homeostasis modulator protein 5 OS=Homo sapiens OX=9606 GN=CALHM5 PE=1 SV=1	CALHM5	4.09514	0.00076309	Up	36	9	80	9	9	35.1	9.21058e+06	7.61759e+06	6.8159e+06	1.41872e+07	1.34395e+07	1.19836e+07	0.465939	0.422975	0.301252	1.69816	1.79124	1.3845
P04920	Anion exchange protein 2 OS=Homo sapiens OX=9606 GN=SLC4A2 PE=1 SV=4	SLC4A2	4.09387	0.000702701	Up	4	3	13	3	3	136.9	883324	902708	734733	1.67361e+06	1.16994e+06	1.42663e+06	0.601089	0.674252	0.436831	2.69472	2.09754	2.21715
P05023	Sodium/potassium-transporting ATPase subunit alpha-1 OS=Homo sapiens OX=9606 GN=ATP1A1 PE=1 SV=1	ATP1A1	4.07446	8.71328e-06	Up	41	38	535	34	39	112.8	2.27534e+08	2.20993e+08	2.65266e+08	4.12303e+08	3.84247e+08	3.81724e+08	0.521585	0.55605	0.531282	2.23633	2.32069	1.99845
Q9Y2Z4	Tyrosine--tRNA ligase, mitochondrial OS=Homo sapiens OX=9606 GN=YARS2 PE=1 SV=2	YARS2	4.0699	0.00305412	Up	15	6	25	6	6	53.2	3.35236e+06	6.21879e+06	4124873	8.29341e+06	6.79515e+06	8.12923e+06	0.362031	0.737149	0.389197	2.11918	1.9334	2.00497
Q9UBI6	Guanine nucleotide-binding protein G(I)/G(S)/G(O) subunit gamma-12 OS=Homo sapiens OX=9606 GN=GNG12 PE=1 SV=3	GNG12	4.06125	2.22705e-05	Up	60	3	86	3	3	8	1.51569e+07	1.67476e+07	1.97718e+07	28857186	2.51158e+07	3.14897e+07	0.496793	0.602523	0.566209	2.238	2.1689	2.35721
Q9ULG6	Cell cycle progression protein 1 OS=Homo sapiens OX=9606 GN=CCPG1 PE=1 SV=3	CCPG1	4.0599	0.000133445	Up	16	10	79	10	10	87.3	8.30257e+06	6.20934e+06	7.54381e+06	1.10711e+07	1.24548e+07	1.27534e+07	0.595188	0.488588	0.472495	1.87791	2.35238	2.08801
P60033	CD81 antigen OS=Homo sapiens OX=9606 GN=CD81 PE=1 SV=1	CD81	4.03689	7.52208e-05	Up	28	3	42	3	3	25.8	2.19277e+07	1.80878e+07	2.515e+07	3.24709e+07	3.75482e+07	3.57355e+07	0.656954	0.594814	0.65833	2.30184	2.96385	2.44515
P0CAP2	DNA-directed RNA polymerase II subunit GRINL1A OS=Homo sapiens OX=9606 GN=POLR2M PE=1 SV=1	POLR2M	4.01622	0.0338777	Up	2	2	18	2	2	41.7	3.42844e+06	2.85955e+06	833198	4.19196e+06	3.65982e+06	4263747	1.11836	1.02385	0.237463	3.2355	3.14536	3.17644
Q8TCZ2	CD99 antigen-like protein 2 OS=Homo sapiens OX=9606 GN=CD99L2 PE=1 SV=1	CD99L2	3.98949	0.00268262	Up	17	2	5	2	2	28	2.67267e+06	1.50578e+06	1.86294e+06	4.04496e+06	2.30439e+06	3.54999e+06	0.82218	0.50844	0.50071	2.94427	1.86769	2.4941
Q12792	Twinfilin-1 OS=Homo sapiens OX=9606 GN=TWF1 PE=1 SV=3	TWF1	3.98175	1.29285e-05	Up	58	17	193	14	14	40.3	5.45793e+07	4.39729e+07	6.00955e+07	8.15864e+07	7.77468e+07	96629655	0.66342	0.58668	0.638216	2.34649	2.48983	2.68248
Q9BTU6	Phosphatidylinositol 4-kinase type 2-alpha OS=Homo sapiens OX=9606 GN=PI4K2A PE=1 SV=1	PI4K2A	3.94784	4.56517e-06	Up	32	13	98	13	13	54	1.4291e+07	1.22777e+07	1.59028e+07	2.34276e+07	1.93922e+07	2.53734e+07	0.591701	0.55797	0.575278	2.29513	2.11541	2.39928
O15439	ATP-binding cassette sub-family C member 4 OS=Homo sapiens OX=9606 GN=ABCC4 PE=1 SV=3	ABCC4	3.94778	0.0175887	Up	15	18	146	17	17	149.4	5.38936e+06	4.51454e+06	8.92582e+06	6.76282e+06	6.08056e+06	1.73406e+07	0.388826	0.357509	0.56264	1.15448	1.15582	2.85725
P22570	NADPH:adrenodoxin oxidoreductase, mitochondrial OS=Homo sapiens OX=9606 GN=FDXR PE=1 SV=3	FDXR	3.9435	0.000691474	Up	30	12	96	12	12	53.8	2.23769e+07	1.81724e+07	3.14397e+07	3.0839e+07	3.95598e+07	4.29234e+07	0.56747	0.505837	0.696603	1.85048	2.64316	2.486
P61254	60S ribosomal protein L26 OS=Homo sapiens OX=9606 GN=RPL26 PE=1 SV=1	RPL26	3.94134	4.47861e-06	Up	49	11	226	2	11	17.2	1.40212e+08	1.43106e+08	1.80968e+08	2.5698e+08	2.27872e+08	2.56793e+08	0.589163	0.660031	0.664382	2.55499	2.52272	2.46433
Q9Y3L5	Ras-related protein Rap-2c OS=Homo sapiens OX=9606 GN=RAP2C PE=1 SV=1	RAP2C	3.93239	0.000220293	Up	46	8	133	3	3	20.7	2.22744e+06	1.5595e+06	1.9772e+06	2.74805e+06	3.03128e+06	3.41309e+06	0.727226	0.558864	0.564001	2.1229	2.60746	2.54493
P62873	Guanine nucleotide-binding protein G(I)/G(S)/G(T) subunit beta-1 OS=Homo sapiens OX=9606 GN=GNB1 PE=1 SV=3	GNB1	3.92785	0.000168406	Up	58	14	373	7	10	37.4	1.11455e+08	1.08586e+08	9.83455e+07	1.77958e+08	1.52148e+08	1.84556e+08	0.653758	0.699111	0.504005	2.46987	2.35131	2.47235
P11234	Ras-related protein Ral-B OS=Homo sapiens OX=9606 GN=RALB PE=1 SV=1	RALB	3.91824	2.5977e-05	Up	51	9	145	4	9	23.4	2.62069e+07	2.59024e+07	3.68471e+07	4.61655e+07	4.37139e+07	5.07133e+07	0.570424	0.61884	0.70073	2.37761	2.50686	2.52098
P05231	Interleukin-6 OS=Homo sapiens OX=9606 GN=IL6 PE=1 SV=1	IL6	3.91632	0.0130333	Up	23	4	19	4	4	23.7	1.77321e+06	1.32571e+06	2.50437e+06	1.60719e+06	3.71483e+06	3.33749e+06	0.364878	0.299429	0.450248	0.782521	2.01398	1.56846
Q9Y3B6	ER membrane protein complex subunit 9 OS=Homo sapiens OX=9606 GN=EMC9 PE=1 SV=3	EMC9	3.91616	0.000893072	Up	14	2	5	2	2	23	944132	898059	744853	1.38512e+06	1.47655e+06	1.28669e+06	0.735379	0.767784	0.50689	2.55275	3.03009	2.28885
P23193	Transcription elongation factor A protein 1 OS=Homo sapiens OX=9606 GN=TCEA1 PE=1 SV=2	TCEA1	3.91565	1.12616e-05	Up	31	9	48	9	9	33.9	2.20539e+07	2.02832e+07	2.56289e+07	3.66484e+07	3.59954e+07	3.48795e+07	0.646206	0.652348	0.656117	2.54087	2.77882	2.33411
O94804	Serine/threonine-protein kinase 10 OS=Homo sapiens OX=9606 GN=STK10 PE=1 SV=1	STK10	3.90654	1.71137e-05	Up	15	11	51	10	11	112.1	1.10367e+07	1.00098e+07	1.10194e+07	1.71201e+07	1.48783e+07	1.92392e+07	0.709725	0.706528	0.619115	2.60494	2.52076	2.82554
O14939	Phospholipase D2 OS=Homo sapiens OX=9606 GN=PLD2 PE=1 SV=2	PLD2	3.89406	0.000743939	Up	2	2	6	2	2	105.9	173331	186965	236892	312671	226359	413277	0.575117	0.68092	0.686746	2.45476	1.97882	3.13174
Q9UBE0	SUMO-activating enzyme subunit 1 OS=Homo sapiens OX=9606 GN=SAE1 PE=1 SV=1	SAE1	3.89342	9.50208e-06	Up	54	14	122	14	14	38.4	4.58823e+07	4.05759e+07	4.69788e+07	7.16e+07	6.10637e+07	7.94935e+07	0.72384	0.70262	0.647535	2.6727	2.53809	2.86414
P08195	4F2 cell-surface antigen heavy chain OS=Homo sapiens OX=9606 GN=SLC3A2 PE=1 SV=3	SLC3A2	3.89192	6.03378e-06	Up	39	21	375	21	21	68	1.05274e+08	8.65955e+07	1.25517e+08	1.68077e+08	1.5221e+08	1.78529e+08	0.689957	0.622951	0.718738	2.60647	2.62829	2.67224
Q15758	Neutral amino acid transporter B(0) OS=Homo sapiens OX=9606 GN=SLC1A5 PE=1 SV=2	SLC1A5	3.88421	1.20855e-05	Up	16	8	131	8	8	56.6	7.21207e+07	5.74043e+07	8.24447e+07	114128724	9.71258e+07	1.2204e+08	0.702988	0.614169	0.702127	2.63223	2.49431	2.71678
Q13740	CD166 antigen OS=Homo sapiens OX=9606 GN=ALCAM PE=1 SV=2	ALCAM	3.87584	1.2051e-06	Up	54	26	470	26	26	65.1	1.28537e+08	1.20624e+08	1.52841e+08	2.05406e+08	2.02011e+08	2.23601e+08	0.71869	0.74029	0.746651	2.71748	2.97588	2.85531
O00186	Syntaxin-binding protein 3 OS=Homo sapiens OX=9606 GN=STXBP3 PE=1 SV=2	STXBP3	3.86906	1.96395e-06	Up	28	16	175	16	16	67.7	3.83065e+07	3.76898e+07	4.66747e+07	6.2983e+07	5.92911e+07	7.0413e+07	0.547801	0.591602	0.583172	2.13115	2.23392	2.29968
P49746	Thrombospondin-3 OS=Homo sapiens OX=9606 GN=THBS3 PE=1 SV=1	THBS3	3.86743	5.57569e-06	Up	15	9	106	8	8	104.1	2.5466e+07	2.38319e+07	3.26793e+07	4.4509e+07	3.73778e+07	4.6538e+07	0.596177	0.612391	0.668424	2.46549	2.30545	2.48821
Q9HAC8	Ubiquitin domain-containing protein 1 OS=Homo sapiens OX=9606 GN=UBTD1 PE=1 SV=1	UBTD1	3.8544	6.06074e-05	Up	11	2	12	2	2	25.9	746916	633732	803776	1.08267e+06	962134	1.3881e+06	0.458655	0.427145	0.431235	1.57309	1.5566	1.9467
Q96KR1	Zinc finger RNA-binding protein OS=Homo sapiens OX=9606 GN=ZFR PE=1 SV=2	ZFR	3.84921	3.69467e-06	Up	10	11	45	11	11	116.9	1.59286e+07	1.42472e+07	1.83645e+07	2.49316e+07	2.49299e+07	2.56561e+07	0.651441	0.639564	0.656211	2.41262	2.68625	2.39637
P15151	Poliovirus receptor OS=Homo sapiens OX=9606 GN=PVR PE=1 SV=2	PVR	3.84865	0.00307872	Up	17	6	64	6	6	45.3	1.00674e+07	1.39139e+07	1.41756e+07	2.30913e+07	2.16558e+07	1.4667e+07	0.498716	0.756559	0.613541	2.70662	2.82643	1.65937
P61769	Beta-2-microglobulin OS=Homo sapiens OX=9606 GN=B2M PE=1 SV=1	B2M	3.84859	0.00238717	Up	55	4	193	4	4	13.7	1.34986e+08	6.876e+07	1.58177e+08	1.75733e+08	1.69636e+08	2.09779e+08	0.516732	0.288915	0.529038	1.59174	1.71089	1.83402
Q9ULI3	Protein HEG homolog 1 OS=Homo sapiens OX=9606 GN=HEG1 PE=1 SV=3	HEG1	3.83542	0.000104297	Up	4	3	23	3	3	147.4	423285	487499	514696	723539	643675	872508	0.343656	0.434431	0.365096	1.38993	1.37685	1.6178
P01889	HLA class I histocompatibility antigen, B alpha chain OS=Homo sapiens OX=9606 GN=HLA-B PE=1 SV=3	HLA-B	3.83443	1.91012e-05	Up	34	9	201	3	3	40.4	9.9591e+06	9.70504e+06	11678568	1.68107e+07	16235385	15591041	0.434947	0.465231	0.445626	1.73717	1.86813	1.55509
P32856	Syntaxin-2 OS=Homo sapiens OX=9606 GN=STX2 PE=1 SV=3	STX2	3.83242	1.77826e-05	Up	24	5	34	5	5	33.3	3.70632e+06	3.83347e+06	4.45295e+06	5.87628e+06	5.80896e+06	7.0195e+06	0.526532	0.597762	0.552706	1.97526	2.17424	2.27747
P08754	Guanine nucleotide-binding protein G(i) subunit alpha-3 OS=Homo sapiens OX=9606 GN=GNAI3 PE=1 SV=3	GNAI3	3.83151	0.00140408	Up	35	12	287	5	5	40.5	5980707	8.329e+06	6.00642e+06	1.03419e+07	9.53166e+06	1.24647e+07	0.704837	1.07742	0.618467	2.88388	2.95959	3.35492
O14495	Phospholipid phosphatase 3 OS=Homo sapiens OX=9606 GN=PLPP3 PE=1 SV=1	PLPP3	3.82513	0.000212688	Up	16	3	18	3	3	35.1	2.10201e+06	1.47888e+06	2.59512e+06	3.29224e+06	2.7361e+06	3.4696e+06	0.787152	0.607872	0.849075	2.91713	2.69949	2.96734
P13726	Tissue factor OS=Homo sapiens OX=9606 GN=F3 PE=1 SV=1	F3	3.82364	0.000390661	Up	34	6	42	6	6	33	4.49597e+06	2.80249e+06	4.13435e+06	5398950	5.5593e+06	6.71805e+06	1.00438	0.687187	0.806953	2.85381	3.27208	3.42755
Q9H6S3	Epidermal growth factor receptor kinase substrate 8-like protein 2 OS=Homo sapiens OX=9606 GN=EPS8L2 PE=1 SV=2	EPS8L2	3.81755	0.000130596	Up	18	7	31	7	7	80.6	4.40833e+06	4.42317e+06	4.11382e+06	6.93667e+06	5.90953e+06	7.48815e+06	0.71862	0.791433	0.585916	2.67557	2.53808	2.78782
Q9UI09	NADH dehydrogenase [ubiquinone] 1 alpha subcomplex subunit 12 OS=Homo sapiens OX=9606 GN=NDUFA12 PE=1 SV=1	NDUFA12	3.7966	0.000448125	Up	34	6	56	6	6	17.1	6.61902e+06	5.13783e+06	6.92148e+06	1.20986e+07	7.39855e+06	9.36137e+06	0.69317	0.590584	0.633301	2.99794	2.04136	2.23898
Q9BZF1	Oxysterol-binding protein-related protein 8 OS=Homo sapiens OX=9606 GN=OSBPL8 PE=1 SV=3	OSBPL8	3.7865	5.13639e-05	Up	24	14	106	13	14	101.1	1.37872e+07	1.02382e+07	1.5635e+07	2.18001e+07	1.78005e+07	2.10178e+07	0.557012	0.454013	0.55189	2.08395	1.89474	1.93928
Q8WWY3	U4/U6 small nuclear ribonucleoprotein Prp31 OS=Homo sapiens OX=9606 GN=PRPF31 PE=1 SV=2	PRPF31	3.78339	0.000162999	Up	35	14	78	14	14	55.4	1.88502e+07	1.41615e+07	2.29708e+07	2.60215e+07	28684720	3.01744e+07	0.694723	0.572875	0.739668	2.26917	2.78531	2.53979
P30533	Alpha-2-macroglobulin receptor-associated protein OS=Homo sapiens OX=9606 GN=LRPAP1 PE=1 SV=1	LRPAP1	3.78023	2.52572e-06	Up	61	23	376	23	23	41.4	1.28661e+08	1.26041e+08	1.42796e+08	2.11867e+08	1.89882e+08	2.09907e+08	0.555509	0.597327	0.538671	2.16444	2.16	2.06983
P04439	HLA class I histocompatibility antigen, A alpha chain OS=Homo sapiens OX=9606 GN=HLA-A PE=1 SV=2	HLA-A	3.77903	0.000201553	Up	45	12	259	7	13	40.8	1.09814e+08	1.41942e+08	1.52526e+08	2.18039e+08	1.83712e+08	2.22187e+08	0.343472	0.487306	0.416815	1.61364	1.5139	1.58715
Q7Z4N8	Prolyl 4-hydroxylase subunit alpha-3 OS=Homo sapiens OX=9606 GN=P4HA3 PE=1 SV=1	P4HA3	3.7781	2.08761e-05	Up	38	11	77	11	11	61.1	8.03959e+06	6.64495e+06	9.6173e+06	1.21808e+07	1.22594e+07	1.25035e+07	0.430328	0.390403	0.449762	1.5427	1.72886	1.52849
P07355	Annexin A2 OS=Homo sapiens OX=9606 GN=ANXA2 PE=1 SV=2	ANXA2	3.75378	1.47601e-06	Up	88	45	5351	45	45	38.6	6.36694e+09	5.29932e+09	7.084e+09	9.62012e+09	8.94427e+09	9.91327e+09	0.657893	0.601036	0.639541	2.35205	2.43499	2.33941
P33527	Multidrug resistance-associated protein 1 OS=Homo sapiens OX=9606 GN=ABCC1 PE=1 SV=3	ABCC1	3.747	1.79073e-05	Up	23	28	253	26	28	171.5	2.25165e+07	1.97486e+07	2.67645e+07	3.60458e+07	2.91141e+07	3.99401e+07	0.484978	0.46689	0.503669	1.83703	1.65216	1.9647
Q15717	ELAV-like protein 1 OS=Homo sapiens OX=9606 GN=ELAVL1 PE=1 SV=2	ELAVL1	3.74437	7.44124e-07	Up	29	8	108	8	8	36.1	7.54244e+07	7.3094e+07	9.33951e+07	1.26629e+08	1.1229e+08	1.28248e+08	0.638117	0.678775	0.690363	2.5349	2.50297	2.47802
P17252	Protein kinase C alpha type OS=Homo sapiens OX=9606 GN=PRKCA PE=1 SV=4	PRKCA	3.74091	2.32615e-05	Up	43	23	274	22	24	76.7	4.00174e+07	3.35552e+07	4.26835e+07	5.40074e+07	5.64275e+07	6.59135e+07	0.595056	0.547677	0.554542	1.90022	2.21069	2.23845
Q96CW1	AP-2 complex subunit mu OS=Homo sapiens OX=9606 GN=AP2M1 PE=1 SV=2	AP2M1	3.73907	6.41021e-05	Up	48	18	331	18	18	49.6	4.37681e+08	3.3394e+08	4.87705e+08	7.16724e+08	5.56238e+08	6.3005e+08	0.633582	0.530603	0.616833	2.45492	2.12145	2.08298
Q14332	Frizzled-2 OS=Homo sapiens OX=9606 GN=FZD2 PE=1 SV=1	FZD2	3.72239	7.22243e-05	Up	13	7	67	4	4	63.5	2.22575e+06	2216513	2.9706e+06	3.44262e+06	3.83886e+06	3.82805e+06	0.424862	0.464406	0.495428	1.5549	1.93064	1.66884
Q12923	Tyrosine-protein phosphatase non-receptor type 13 OS=Homo sapiens OX=9606 GN=PTPN13 PE=1 SV=2	PTPN13	3.72121	9.54631e-06	Up	2	3	5	3	3	276.7	1.77449e+06	1.81546e+06	2.11353e+06	3.07679e+06	2.48164e+06	3.09639e+06	0.559714	0.628545	0.582462	2.29632	2.06234	2.23057
P61204	ADP-ribosylation factor 3 OS=Homo sapiens OX=9606 GN=ARF3 PE=1 SV=2	ARF3	3.71912	2.17137e-05	Up	40	8	239	2	2	20.6	6.69381e+07	5.19189e+07	7.07582e+07	9.65448e+07	8.26275e+07	1.07136e+08	0.678901	0.577981	0.62701	2.31687	2.20793	2.48161
O60462	Neuropilin-2 OS=Homo sapiens OX=9606 GN=NRP2 PE=1 SV=3	NRP2	3.71807	2.70806e-06	Up	27	22	153	22	22	104.8	2.28927e+07	2.15534e+07	2.43982e+07	3.5095e+07	3.28684e+07	3.62099e+07	0.563512	0.582341	0.52472	2.04405	2.13163	2.03562
P62879	Guanine nucleotide-binding protein G(I)/G(S)/G(T) subunit beta-2 OS=Homo sapiens OX=9606 GN=GNB2 PE=1 SV=3	GNB2	3.70895	9.71151e-06	Up	54	13	282	5	5	37.3	1.75315e+07	1.5989e+07	2.24677e+07	2.70341e+07	2.61131e+07	3.07186e+07	0.649261	0.649945	0.726982	2.36894	2.54793	2.59817
P62917	60S ribosomal protein L8 OS=Homo sapiens OX=9606 GN=RPL8 PE=1 SV=2	RPL8	3.70661	4.32313e-06	Up	59	15	349	15	15	28	2.92465e+08	2.78096e+08	3.21995e+08	4.78224e+08	4.18685e+08	4.48198e+08	0.650946	0.679394	0.62616	2.51851	2.45519	2.27827
Q99719	Septin-5 OS=Homo sapiens OX=9606 GN=SEPTIN5 PE=1 SV=1	SEPTIN5	3.69789	0.000852926	Up	30	9	54	9	9	42.8	9.26644e+06	6.17587e+06	1.22651e+07	12875976	1.19938e+07	1.61545e+07	0.649745	0.475318	0.751388	2.13624	2.21571	2.58695
Q06124	Tyrosine-protein phosphatase non-receptor type 11 OS=Homo sapiens OX=9606 GN=PTPN11 PE=1 SV=3	PTPN11	3.69697	2.82399e-06	Up	41	16	59	16	16	68	5.17728e+07	5.00669e+07	5.99625e+07	8.51289e+07	7.01703e+07	8.84252e+07	0.603632	0.640733	0.610823	2.34849	2.15552	2.35457
P06756	Integrin alpha-V OS=Homo sapiens OX=9606 GN=ITGAV PE=1 SV=2	ITGAV	3.68221	8.53586e-07	Up	42	40	620	40	40	116	1.56708e+08	1.39143e+08	1.6896e+08	2.28487e+08	2.15798e+08	2.51238e+08	0.535767	0.522161	0.5047	1.84836	1.94384	1.96171
Q96JI7	Spatacsin OS=Homo sapiens OX=9606 GN=SPG11 PE=1 SV=3	SPG11	3.67702	1.407e-06	Up	1	3	29	3	3	278.7	1.29706e+07	1.28407e+07	1.60427e+07	2.17158e+07	1.8906e+07	21833147	0.621464	0.675305	0.671584	2.46192	2.38663	2.38912
Q96RD7	Pannexin-1 OS=Homo sapiens OX=9606 GN=PANX1 PE=1 SV=4	PANX1	3.6709	0.000164663	Up	9	4	35	4	4	48	3.55211e+06	4.05504e+06	5.29701e+06	6.51311e+06	5.39045e+06	7.33604e+06	0.397091	0.497571	0.517368	1.7228	1.58766	1.87297
Q02878	60S ribosomal protein L6 OS=Homo sapiens OX=9606 GN=RPL6 PE=1 SV=3	RPL6	3.66163	1.12758e-05	Up	35	13	405	13	13	32.7	4.11912e+08	3.9326e+08	4.48981e+08	639434597	5.32735e+08	7.04351e+08	0.681929	0.714612	0.649423	2.50479	2.32366	2.6631
Q96D96	Voltage-gated hydrogen channel 1 OS=Homo sapiens OX=9606 GN=HVCN1 PE=1 SV=1	HVCN1	3.66037	0.000932102	Up	12	2	12	2	2	31.7	725138	779596	1.02112e+06	1.32329e+06	1.37122e+06	1.01071e+06	0.515799	0.608674	0.634601	2.22718	2.56976	1.64191
P09001	39S ribosomal protein L3, mitochondrial OS=Homo sapiens OX=9606 GN=MRPL3 PE=1 SV=1	MRPL3	3.63849	6.96928e-06	Up	30	8	77	8	8	38.6	4.0026e+07	3.61662e+07	4.6721e+07	6.01004e+07	6.00935e+07	6.04525e+07	0.686678	0.681036	0.700306	2.43966	2.71623	2.36859
P61086	Ubiquitin-conjugating enzyme E2 K OS=Homo sapiens OX=9606 GN=UBE2K PE=1 SV=3	UBE2K	3.63633	2.42762e-05	Up	54	9	97	9	9	22.4	4.1406e+07	4.59635e+07	51320737	6.8971e+07	6.26567e+07	7.39094e+07	0.553349	0.674225	0.599231	2.18094	2.20613	2.2558
Q13505	Metaxin-1 OS=Homo sapiens OX=9606 GN=MTX1 PE=1 SV=3	MTX1	3.61842	0.000294377	Up	23	9	107	9	9	51.4	4.90435e+07	4.34874e+07	5.68399e+07	8.28857e+07	5.35016e+07	8.44169e+07	0.728905	0.709429	0.738087	2.91481	2.095	2.86539
Q8IYU8	Calcium uptake protein 2, mitochondrial OS=Homo sapiens OX=9606 GN=MICU2 PE=1 SV=2	MICU2	3.61287	0.000986719	Up	22	6	30	6	6	49.6	1.37891e+06	1.3541e+06	2.52333e+06	2.54698e+06	2.17154e+06	2.87626e+06	0.482227	0.519784	0.771002	2.10757	2.00084	2.29725
Q01813	ATP-dependent 6-phosphofructokinase, platelet type OS=Homo sapiens OX=9606 GN=PFKP PE=1 SV=2	PFKP	3.61134	3.83416e-05	Up	49	32	627	28	32	85.5	2.89025e+08	2.55368e+08	3.66085e+08	4.34491e+08	3.80322e+08	5.17122e+08	0.674406	0.654047	0.746335	2.39888	2.33811	2.75578
Q12884	Prolyl endopeptidase FAP OS=Homo sapiens OX=9606 GN=FAP PE=1 SV=5	FAP	3.60784	3.98229e-07	Up	43	31	602	31	31	87.7	8.53463e+07	7.9241e+07	1.01634e+08	1.28476e+08	1.19867e+08	1.41114e+08	0.320627	0.326754	0.333594	1.14203	1.18643	1.21074
Q8N9N7	Leucine-rich repeat-containing protein 57 OS=Homo sapiens OX=9606 GN=LRRC57 PE=1 SV=1	LRRC57	3.60596	0.0101408	Up	8	2	9	2	2	26.7	707032	515361	1.72894e+06	1.44513e+06	1.17782e+06	1538573	0.527894	0.422352	1.12785	2.55303	2.31694	2.62356
P69891	Hemoglobin subunit gamma-1 OS=Homo sapiens OX=9606 GN=HBG1 PE=1 SV=2	HBG1	3.60041	0.00422789	Up	38	4	149	2	2	16.1	2.84296e+06	4.11613e+06	5302831	7.91017e+06	5.01935e+06	4.92268e+06	0.333935	0.530683	0.544206	2.19845	1.55334	1.32056
Q92616	eIF-2-alpha kinase activator GCN1 OS=Homo sapiens OX=9606 GN=GCN1 PE=1 SV=6	GCN1	3.59238	1.02059e-06	Up	42	94	796	94	94	292.6	3.41847e+08	3.04316e+08	4.01325e+08	5.34726e+08	4.46802e+08	5.45226e+08	0.636625	0.62206	0.653	2.35627	2.19227	2.31896
P35080	Profilin-2 OS=Homo sapiens OX=9606 GN=PFN2 PE=1 SV=3	PFN2	3.5922	4.97543e-05	Up	25	3	39	3	3	15	49656978	4.4959e+07	58278396	7.3677e+07	7.70962e+07	7.05396e+07	0.744072	0.739447	0.76297	2.61221	3.04366	2.41397
O95479	GDH/6PGL endoplasmic bifunctional protein OS=Homo sapiens OX=9606 GN=H6PD PE=1 SV=2	H6PD	3.58516	8.57789e-05	Up	45	28	333	28	28	88.8	6.94205e+07	5.69792e+07	8.24557e+07	9.53026e+07	8.68158e+07	1.21356e+08	0.607377	0.547196	0.630313	1.97295	2.00123	2.42492
Q96TA2	ATP-dependent zinc metalloprotease YME1L1 OS=Homo sapiens OX=9606 GN=YME1L1 PE=1 SV=2	YME1L1	3.58488	0.00100775	Up	8	5	38	5	5	86.4	3.10335e+06	2.95804e+06	2.45641e+06	4.50626e+06	3.32022e+06	4.83759e+06	0.755319	0.790241	0.522355	2.59512	2.12909	2.68902
P39023	60S ribosomal protein L3 OS=Homo sapiens OX=9606 GN=RPL3 PE=1 SV=2	RPL3	3.57968	2.23678e-06	Up	46	19	648	19	19	46.1	4.97767e+08	4.36855e+08	5.48439e+08	7.71459e+08	6.59208e+08	7.23095e+08	0.699926	0.674247	0.673783	2.56673	2.44217	2.32213
Q96KA5	Cleft lip and palate transmembrane protein 1-like protein OS=Homo sapiens OX=9606 GN=CLPTM1L PE=1 SV=1	CLPTM1L	3.57487	0.00767444	Up	31	12	117	12	12	62.2	2.38501e+07	2.07503e+07	2.50756e+07	3.90255e+07	1.81018e+07	4.59628e+07	0.758465	0.724312	0.696725	2.93653	1.51668	3.33823
P12429	Annexin A3 OS=Homo sapiens OX=9606 GN=ANXA3 PE=1 SV=3	ANXA3	3.56601	0.00045376	Up	46	13	119	13	13	36.4	1.14433e+07	1.17313e+07	9.79651e+06	1.62609e+07	1.50561e+07	1.71219e+07	0.648064	0.72924	0.484734	2.17898	2.24651	2.21454
P17302	Gap junction alpha-1 protein OS=Homo sapiens OX=9606 GN=GJA1 PE=1 SV=2	GJA1	3.56492	0.000301558	Up	32	9	166	9	9	43	1.63051e+07	2.0808e+07	2.07543e+07	2.81241e+07	2.41636e+07	32393702	0.431603	0.604569	0.479991	1.76149	1.68519	1.95833
P83881	60S ribosomal protein L36a OS=Homo sapiens OX=9606 GN=RPL36A PE=1 SV=2	RPL36A	3.56341	0.000648133	Up	40	7	86	2	7	12.4	37132995	4.29766e+07	3.96584e+07	5.06038e+07	6.27076e+07	6.0834e+07	0.671867	0.853514	0.626937	2.16644	2.98931	2.51383
Q86U28	Iron-sulfur cluster assembly 2 homolog, mitochondrial OS=Homo sapiens OX=9606 GN=ISCA2 PE=1 SV=2	ISCA2	3.5595	0.00168855	Up	13	2	5	2	2	16.5	6.50662e+06	4.59109e+06	4.20101e+06	8.17341e+06	6.23343e+06	8.05669e+06	0.774875	0.600133	0.437115	2.30314	1.95583	2.19128
Q96S97	Myeloid-associated differentiation marker OS=Homo sapiens OX=9606 GN=MYADM PE=1 SV=2	MYADM	3.55471	3.73296e-05	Up	19	4	70	4	4	35.3	2.65238e+07	2.88779e+07	29662922	4.17847e+07	3.81924e+07	4.36075e+07	0.553666	0.661658	0.540992	2.06381	2.10047	2.07892
P13611	Versican core protein OS=Homo sapiens OX=9606 GN=VCAN PE=1 SV=3	VCAN	3.55257	8.50376e-06	Up	13	32	206	32	32	372.6	2.98927e+07	28086749	3.44428e+07	4.36841e+07	4.43708e+07	4.48191e+07	0.531269	0.547907	0.534827	1.83702	2.07766	1.81919
Q99943	1-acyl-sn-glycerol-3-phosphate acyltransferase alpha OS=Homo sapiens OX=9606 GN=AGPAT1 PE=1 SV=2	AGPAT1	3.54663	1.4112e-05	Up	26	5	37	5	5	31.7	9.27377e+06	7.59776e+06	9.60726e+06	1.32892e+07	1.22138e+07	1.25291e+07	0.676751	0.608574	0.612543	2.29463	2.34827	2.08813
P26373	60S ribosomal protein L13 OS=Homo sapiens OX=9606 GN=RPL13 PE=1 SV=4	RPL13	3.53431	2.20584e-05	Up	42	10	258	10	10	24.2	2.92534e+08	2.73787e+08	3.02311e+08	4.21631e+08	4.11458e+08	4.15025e+08	0.714643	0.734145	0.645255	2.43717	2.64829	2.31554
P09543	2',3'-cyclic-nucleotide 3'-phosphodiesterase OS=Homo sapiens OX=9606 GN=CNP PE=1 SV=2	CNP	3.52785	4.52007e-06	Up	42	21	209	21	21	47.5	5.08461e+07	4.09841e+07	5.53307e+07	7.24576e+07	6.29289e+07	7.50416e+07	0.669092	0.591971	0.636151	2.25607	2.18176	2.25525
Q9Y6Q2	Stonin-1 OS=Homo sapiens OX=9606 GN=STON1 PE=1 SV=2	STON1	3.51994	0.00132721	Up	14	10	39	10	10	83.1	3.52434e+06	2.48363e+06	2.7085e+06	4.33736e+06	4.4965e+06	3.59976e+06	0.450327	0.348332	0.302374	1.31134	1.51374	1.05048
Q9Y485	DmX-like protein 1 OS=Homo sapiens OX=9606 GN=DMXL1 PE=1 SV=3	DMXL1	3.51522	0.0286149	Up	2	3	20	3	3	337.6	1.0237e+06	215120	618466	847110	825106	941280	0.998645	0.230344	0.527134	1.95533	2.12069	2.09712
P49207	60S ribosomal protein L34 OS=Homo sapiens OX=9606 GN=RPL34 PE=1 SV=3	RPL34	3.50768	0.00010459	Up	37	6	138	6	6	13.3	9.4093e+07	1.05477e+08	1.1475e+08	1.52329e+08	1.50907e+08	1.44405e+08	0.614417	0.755995	0.654674	2.35358	2.59622	2.15355
Q969X1	Protein lifeguard 3 OS=Homo sapiens OX=9606 GN=TMBIM1 PE=1 SV=2	TMBIM1	3.50027	0.00175425	Up	9	2	9	2	2	34.6	692651		1.05318e+06	1.21746e+06	988767	1.30577e+06	0.481039		0.639045	2.0006	1.8092	2.07109
O14656	Torsin-1A OS=Homo sapiens OX=9606 GN=TOR1A PE=1 SV=1	TOR1A	3.49896	6.45077e-06	Up	43	11	113	10	11	37.8	2.01608e+07	1.73873e+07	2.42432e+07	3.05193e+07	2.53289e+07	3.17383e+07	0.595951	0.564145	0.62612	2.13461	1.97263	2.14265
P49184	Deoxyribonuclease-1-like 1 OS=Homo sapiens OX=9606 GN=DNASE1L1 PE=1 SV=1	DNASE1L1	3.49368	0.000384257	Up	18	4	36	4	4	33.9	6.02332e+06	7.93738e+06	8.51063e+06	1.03734e+07	1.06014e+07	1.09393e+07	0.459859	0.665152	0.567695	1.87391	2.13245	1.90741
Q9NZ01	Very-long-chain enoyl-CoA reductase OS=Homo sapiens OX=9606 GN=TECR PE=1 SV=1	TECR	3.49093	2.44102e-05	Up	30	10	127	10	10	36	4.93049e+07	4.71486e+07	5.13556e+07	6.65221e+07	6.61264e+07	7.78495e+07	0.634912	0.666419	0.577798	2.02689	2.2435	2.28952
Q9BV86	N-terminal Xaa-Pro-Lys N-methyltransferase 1 OS=Homo sapiens OX=9606 GN=NTMT1 PE=1 SV=3	NTMT1	3.48892	0.000246888	Up	14	4	32	4	4	25.4	8.30311e+06	6.19595e+06	7.8682e+06	1.11979e+07	1.07485e+07	9.57451e+06	0.832449	0.681836	0.689219	2.65639	2.83917	2.19229
Q9UNW1	Multiple inositol polyphosphate phosphatase 1 OS=Homo sapiens OX=9606 GN=MINPP1 PE=1 SV=1	MINPP1	3.48309	0.000135131	Up	21	9	88	9	9	55	2.39457e+07	2.23806e+07	3.08012e+07	3.29027e+07	3.84509e+07	3.65809e+07	0.596717	0.612167	0.670615	1.94005	2.5245	2.08191
Q4KMQ2	Anoctamin-6 OS=Homo sapiens OX=9606 GN=ANO6 PE=1 SV=2	ANO6	3.48209	0.000149453	Up	16	12	72	12	12	106.1	6.80212e+06	6.22868e+06	6.39088e+06	1.00953e+07	7.50929e+06	1.01862e+07	0.54111	0.543868	0.444189	1.9002	1.57387	1.85062
A2RRP1	Neuroblastoma-amplified sequence OS=Homo sapiens OX=9606 GN=NBAS PE=1 SV=2	NBAS	3.47854	4.84244e-05	Up	26	43	300	43	43	268.4	8.12588e+07	6.49336e+07	8.38707e+07	1.02e+08	9.67938e+07	1.26595e+08	0.745766	0.654119	0.672523	2.21499	2.34049	2.65347
Q6DD87	Zinc finger protein 787 OS=Homo sapiens OX=9606 GN=ZNF787 PE=1 SV=4	ZNF787	3.47357	3.12846e-07	Up	11	3	10	3	3	40.4	2.00266e+06	1.82293e+06	2.31654e+06	2.93812e+06	2.56962e+06	3.15913e+06	0.732535	0.731895	0.740331	2.54292	2.47639	2.63909
Q92665	28S ribosomal protein S31, mitochondrial OS=Homo sapiens OX=9606 GN=MRPS31 PE=1 SV=3	MRPS31	3.46074	9.84082e-05	Up	25	8	74	8	8	45.3	1.10248e+07	9.53962e+06	1.01325e+07	1.48778e+07	14262667	1.41201e+07	0.839951	0.797752	0.674469	2.68201	2.86292	2.45689
P35908	Keratin, type II cytoskeletal 2 epidermal OS=Homo sapiens OX=9606 GN=KRT2 PE=1 SV=2	KRT2	3.45397	4.60872e-07	Up	40	23	280	14	19	65.4	3.1485e+07	3.01539e+07	3.65831e+07	4.6929e+07	4.1159e+07	4.99093e+07	0.635572	0.668129	0.645219	2.24152	2.18904	2.30095
Q12929	Epidermal growth factor receptor kinase substrate 8 OS=Homo sapiens OX=9606 GN=EPS8 PE=1 SV=1	EPS8	3.4521	0.000351434	Up	12	9	33	9	9	91.8	6.99771e+06	6.43442e+06	6.80598e+06	8.67352e+06	1.04425e+07	9.20806e+06	0.767672	0.774791	0.652342	2.25142	3.01824	2.30703
O15427	Monocarboxylate transporter 4 OS=Homo sapiens OX=9606 GN=SLC16A3 PE=1 SV=1	SLC16A3	3.45056	1.07188e-05	Up	14	6	116	6	6	49.4	5.58898e+07	4.60827e+07	5.79461e+07	8.10904e+07	6.7126e+07	7.59045e+07	0.670525	0.606842	0.607395	2.30193	2.12178	2.07977
P41252	Isoleucine--tRNA ligase, cytoplasmic OS=Homo sapiens OX=9606 GN=IARS1 PE=1 SV=2	IARS1	3.44424	1.28998e-06	Up	44	44	507	44	44	144.4	2.01982e+08	1.82601e+08	2.29959e+08	3.07385e+08	260568318	2.90814e+08	0.703458	0.698046	0.699745	2.53308	2.39097	2.31316
Q53G44	Interferon-induced protein 44-like OS=Homo sapiens OX=9606 GN=IFI44L PE=2 SV=3	IFI44L	3.4419	0.000296662	Up	21	7	30	7	7	51.3	2.53263e+06	2.78163e+06	3.66112e+06	3.63426e+06	4.15297e+06	4.68277e+06	0.489384	0.589974	0.618096	1.66163	2.11428	2.06655
Q9NW15	Anoctamin-10 OS=Homo sapiens OX=9606 GN=ANO10 PE=1 SV=2	ANO10	3.43788	3.29589e-05	Up	20	11	119	11	11	76.3	2.61681e+07	2.56611e+07	2.95505e+07	3.6901e+07	3.86765e+07	3.78062e+07	0.613946	0.660829	0.605744	2.04851	2.39074	2.02575
Q99613	Eukaryotic translation initiation factor 3 subunit C OS=Homo sapiens OX=9606 GN=EIF3C PE=1 SV=1	EIF3C	3.43073	1.47422e-06	Up	41	30	380	30	30	105.3	1.24764e+08	1.1316e+08	1.31792e+08	1.72889e+08	1.59348e+08	1.84027e+08	0.71784	0.714639	0.66251	2.35368	2.41552	2.41815
Q9NY35	Claudin domain-containing protein 1 OS=Homo sapiens OX=9606 GN=CLDND1 PE=1 SV=1	CLDND1	3.41937	0.000894825	Up	7	2	5	2	2	28.6	877045		1.19925e+06	1.4657e+06	1.12975e+06	1.50098e+06	0.566051		0.676251	2.23831	1.92108	2.21245
Q99653	Calcineurin B homologous protein 1 OS=Homo sapiens OX=9606 GN=CHP1 PE=1 SV=3	CHP1	3.4115	9.26656e-06	Up	44	8	132	8	8	22.4	2.00102e+07	1.64609e+07	2.38277e+07	2.77584e+07	2.57956e+07	2.94602e+07	0.634127	0.57258	0.659741	2.08143	2.15377	2.13219
Q01650	Large neutral amino acids transporter small subunit 1 OS=Homo sapiens OX=9606 GN=SLC7A5 PE=1 SV=2	SLC7A5	3.39751	0.00104434	Up	8	3	84	3	3	55	2.08882e+07	21389365	1.75949e+07	28405270	2.89168e+07	2.6081e+07	0.809021	0.909312	0.595403	2.60315	2.95078	2.307
P50148	Guanine nucleotide-binding protein G(q) subunit alpha OS=Homo sapiens OX=9606 GN=GNAQ PE=1 SV=4	GNAQ	3.39693	0.0119006	Up	29	9	139	4	4	42.1	5.14739e+06	5.95841e+06	2.80344e+06	6.38453e+06	6.38293e+06	7.04881e+06	0.555513	0.705819	0.26434	1.63034	1.81491	1.73735
Q15771	Ras-related protein Rab-30 OS=Homo sapiens OX=9606 GN=RAB30 PE=1 SV=2	RAB30	3.39577	0.000158405	Up	15	3	35	2	2	23	1.21514e+06	1.26219e+06	1.77809e+06	2.0283e+06	1.92392e+06	1.85573e+06	0.649094	0.740052	0.829851	2.56362	2.70767	2.26391
P15144	Aminopeptidase N OS=Homo sapiens OX=9606 GN=ANPEP PE=1 SV=4	ANPEP	3.38363	1.22656e-06	Up	47	44	1014	44	44	109.5	5.25665e+08	4.94984e+08	5.74535e+08	7.37224e+08	6.88653e+08	7.69211e+08	0.659526	0.681664	0.629802	2.18859	2.27641	2.20411
P51153	Ras-related protein Rab-13 OS=Homo sapiens OX=9606 GN=RAB13 PE=1 SV=1	RAB13	3.37576	0.000718945	Up	39	8	180	5	5	22.8	1.3977e+07	1.89717e+07	1.62949e+07	2.29894e+07	2.17851e+07	2.35339e+07	0.511018	0.761352	0.520523	1.9888	2.0985	1.96508
P25942	Tumor necrosis factor receptor superfamily member 5 OS=Homo sapiens OX=9606 GN=CD40 PE=1 SV=1	CD40	3.36575	0.000577564	Up	6	2	12	2	2	30.6	1.99018e+06	2.59452e+06	2310815	3.28505e+06	2.71017e+06	3575357	0.536933	0.768316	0.544701	2.09706	1.92643	2.20299
Q9NZM1	Myoferlin OS=Homo sapiens OX=9606 GN=MYOF PE=1 SV=1	MYOF	3.36265	1.8041e-06	Up	56	99	1858	98	99	234.6	6.78148e+08	6.17252e+08	7.63817e+08	9.10443e+08	8.63927e+08	1.03873e+09	0.655939	0.655325	0.645495	2.08369	2.20163	2.29459
P12081	Histidine--tRNA ligase, cytoplasmic OS=Homo sapiens OX=9606 GN=HARS1 PE=1 SV=2	HARS1	3.36191	9.68812e-07	Up	44	24	258	17	24	57.4	103668984	9.80523e+07	1.25747e+08	1.57291e+08	1.35224e+08	1.53804e+08	0.669739	0.695297	0.709772	2.40437	2.30164	2.26929
P52758	2-iminobutanoate/2-iminopropanoate deaminase OS=Homo sapiens OX=9606 GN=RIDA PE=1 SV=1	RIDA	3.35881	0.000545392	Up	41	4	22	4	4	14.5	1.98844e+07	16340039	2.33385e+07	2.6292e+07	3.0111e+07	2.36335e+07	0.669195	0.6036	0.686243	2.09366	2.66989	1.81649
P46777	60S ribosomal protein L5 OS=Homo sapiens OX=9606 GN=RPL5 PE=1 SV=3	RPL5	3.35836	7.54488e-06	Up	60	19	403	19	19	34.3	3.54694e+08	3.5947e+08	3.96695e+08	510718599	4.67049e+08	5.43521e+08	0.687347	0.764612	0.671651	2.34178	2.38459	2.40549
P05106	Integrin beta-3 OS=Homo sapiens OX=9606 GN=ITGB3 PE=1 SV=2	ITGB3	3.34798	0.00100805	Up	40	18	105	18	18	87	9.05063e+06	1.00806e+07	8.56315e+06	1.29441e+07	1.00118e+07	1.54953e+07	0.513094	0.627276	0.424147	1.73632	1.4954	2.00624
Q92576	PHD finger protein 3 OS=Homo sapiens OX=9606 GN=PHF3 PE=1 SV=3	PHF3	3.34715	0.000142679	Up	3	3	17	3	3	229.3	643799	610193	705557	955749		895535	0.71705	0.745972	0.686588	2.51874		2.27796
P07585	Decorin OS=Homo sapiens OX=9606 GN=DCN PE=1 SV=1	DCN	3.34698	4.88857e-06	Up	44	12	186	11	11	39.7	7.47586e+07	6.41028e+07	7.74269e+07	9.59964e+07	9.18236e+07	1.06427e+08	0.649066	0.610887	0.587334	1.97208	2.10044	2.11031
Q12846	Syntaxin-4 OS=Homo sapiens OX=9606 GN=STX4 PE=1 SV=2	STX4	3.34064	7.71635e-06	Up	17	4	45	4	4	34.2	6.83504e+06	6.71456e+06	8.65404e+06	1.05882e+07	9.37781e+06	1.00499e+07	0.565316	0.609569	0.625365	2.07211	2.04352	1.89836
P22352	Glutathione peroxidase 3 OS=Homo sapiens OX=9606 GN=GPX3 PE=1 SV=2	GPX3	3.33815	9.16953e-05	Up	11	3	42	3	3	25.5	6.75877e+06	7018621	8.0459e+06	8.84229e+06	9.73715e+06	1.10202e+07	0.633737	0.722352	0.659145	1.96177	2.40547	2.35991
P08473	Neprilysin OS=Homo sapiens OX=9606 GN=MME PE=1 SV=2	MME	3.32877	1.2018e-07	Up	59	43	707	43	43	85.5	1.91197e+08	1.71476e+08	2.25847e+08	2.69259e+08	2.4454e+08	2.79546e+08	0.433591	0.426835	0.447486	1.44481	1.46109	1.44783
Q9Y5S9	RNA-binding protein 8A OS=Homo sapiens OX=9606 GN=RBM8A PE=1 SV=1	RBM8A	3.32157	0.000105104	Up	61	8	70	8	8	19.9	54877264	5.15258e+07	5.93694e+07	7.08885e+07	6.31449e+07	9.12191e+07	0.73128	0.753654	0.691224	2.23515	2.21695	2.77614
Q96QK1	Vacuolar protein sorting-associated protein 35 OS=Homo sapiens OX=9606 GN=VPS35 PE=1 SV=2	VPS35	3.31935	3.0951e-06	Up	34	23	390	23	23	91.6	3.88533e+08	376745063	4.31288e+08	5.56007e+08	5.06959e+08	5.52509e+08	0.654458	0.696557	0.634725	2.21602	2.24985	2.12548
Q13488	V-type proton ATPase 116 kDa subunit a3 OS=Homo sapiens OX=9606 GN=TCIRG1 PE=1 SV=3	TCIRG1	3.30571	0.000223905	Up	21	16	149	16	16	92.9	7.07525e+07	5.8702e+07	9.3325e+07	1.06234e+08	7.92824e+07	1.1217e+08	0.626372	0.570426	0.721861	2.22533	1.84925	2.26795
P54709	Sodium/potassium-transporting ATPase subunit beta-3 OS=Homo sapiens OX=9606 GN=ATP1B3 PE=1 SV=1	ATP1B3	3.29242	0.000445818	Up	30	8	149	8	8	31.5	6.38286e+07	7.62962e+07	6.95457e+07	9.7381e+07	9.43207e+07	9.06405e+07	0.605892	0.794947	0.576786	2.18723	2.35892	1.96502
Q96Q45	Transmembrane protein 237 OS=Homo sapiens OX=9606 GN=TMEM237 PE=1 SV=2	TMEM237	3.2853	0.00971632	Up	6	2	6	2	2	45.5	441507	379292	1.00142e+06	632607	741730	981525	0.571609	0.539003	1.13278	1.93792	2.53009	2.90221
P30825	High affinity cationic amino acid transporter 1 OS=Homo sapiens OX=9606 GN=SLC7A1 PE=1 SV=1	SLC7A1	3.28064	0.00326785	Up	8	4	41	4	4	67.6	5.69145e+06	5.40905e+06	1.01377e+07	8.46469e+06	7.15568e+06	1.24026e+07	0.627336	0.654417	0.976301	2.20765	2.07805	3.12217
P09619	Platelet-derived growth factor receptor beta OS=Homo sapiens OX=9606 GN=PDGFRB PE=1 SV=1	PDGFRB	3.27997	0.000466516	Up	28	24	248	22	24	123.9	3.51558e+07	4.18921e+07	5.28556e+07	6.70557e+07	5.01493e+07	5.55243e+07	0.524951	0.686609	0.689569	2.36918	1.97294	1.89352
Q14258	E3 ubiquitin/ISG15 ligase TRIM25 OS=Homo sapiens OX=9606 GN=TRIM25 PE=1 SV=2	TRIM25	3.2632	0.000204301	Up	43	20	219	20	20	70.9	5.64686e+07	5.42809e+07	6.73842e+07	6.9554e+07	6.94986e+07	9.76983e+07	0.637818	0.672965	0.664986	1.85888	2.0682	2.52024
Q9BZF9	Uveal autoantigen with coiled-coil domains and ankyrin repeats OS=Homo sapiens OX=9606 GN=UACA PE=1 SV=2	UACA	3.25753	0.00142375	Up	23	27	110	27	27	162.4	4.14672e+07	3.0757e+07	4.31585e+07	4.1546e+07	5.91703e+07	4.97803e+07	0.915136	0.745042	0.83217	2.16946	3.44042	2.50901
P41217	OX-2 membrane glycoprotein OS=Homo sapiens OX=9606 GN=CD200 PE=1 SV=4	CD200	3.25013	2.87399e-05	Up	19	3	32	3	3	31.2	1.18813e+06	1.00261e+06	1.46605e+06	1.5478e+06	1.45211e+06	1.80102e+06	0.44472	0.411918	0.479446	1.37082	1.43203	1.5396
Q04941	Proteolipid protein 2 OS=Homo sapiens OX=9606 GN=PLP2 PE=1 SV=1	PLP2	3.24096	6.01346e-07	Up	18	2	22	2	2	16.7	20022742	17298038	23060920	26933280	23911474	28461742	0.687927	0.652336	0.692246	2.18952	2.16448	2.23329
P60903	Protein S100-A10 OS=Homo sapiens OX=9606 GN=S100A10 PE=1 SV=2	S100A10	3.24063	5.58837e-05	Up	36	3	392	3	3	11.2	1.62791e+08	1.65733e+08	2.14453e+08	2.32456e+08	2.05637e+08	2.76919e+08	0.663564	0.741512	0.763749	2.242	2.20842	2.57793
P40429	60S ribosomal protein L13a OS=Homo sapiens OX=9606 GN=RPL13A PE=1 SV=2	RPL13A	3.24017	2.01138e-05	Up	41	10	228	10	10	23.6	1.46754e+08	1.18576e+08	1.73923e+08	1.89031e+08	1.81089e+08	2.03697e+08	0.730773	0.648108	0.756686	2.22724	2.37581	2.31655
Q92859	Neogenin OS=Homo sapiens OX=9606 GN=NEO1 PE=1 SV=2	NEO1	3.23775	4.39643e-05	Up	7	6	19	6	6	159.9	1.39001e+06	1.5465e+06	1.80232e+06	2.04334e+06	1.95283e+06	2.23971e+06	0.537796	0.656758	0.609249	1.8706	1.99063	1.97905
P14923	Junction plakoglobin OS=Homo sapiens OX=9606 GN=JUP PE=1 SV=3	JUP	3.23631	0.000327154	Up	36	21	264	16	16	81.7	9.09143e+06	1.08048e+07	1.12204e+07	1.43508e+07	1.10804e+07	1.593e+07	0.42646	0.556311	0.459855	1.5928	1.3694	1.70658
Q96HS1	Serine/threonine-protein phosphatase PGAM5, mitochondrial OS=Homo sapiens OX=9606 GN=PGAM5 PE=1 SV=2	PGAM5	3.23484	7.68975e-05	Up	25	7	61	7	7	32	1.08557e+07	11427830	1.45786e+07	1.68703e+07	1.58e+07	1.54786e+07	0.707705	0.817738	0.830376	2.60231	2.7138	2.30458
P00533	Epidermal growth factor receptor OS=Homo sapiens OX=9606 GN=EGFR PE=1 SV=2	EGFR	3.22468	2.06781e-06	Up	30	27	215	26	27	134.2	9.07287e+07	8.18303e+07	1.05221e+08	1.28492e+08	1.05288e+08	1.30145e+08	0.746055	0.738578	0.755953	2.50003	2.28105	2.44409
P78536	Disintegrin and metalloproteinase domain-containing protein 17 OS=Homo sapiens OX=9606 GN=ADAM17 PE=1 SV=1	ADAM17	3.21784	0.00130699	Up	5	4	9	4	4	93	1.40365e+06	1.38449e+06	1.09183e+06	1.63908e+06	1.64219e+06	1.87029e+06	0.800259	0.866395	0.543862	2.21111	2.46673	2.43525
Q9NZI8	Insulin-like growth factor 2 mRNA-binding protein 1 OS=Homo sapiens OX=9606 GN=IGF2BP1 PE=1 SV=2	IGF2BP1	3.21142	6.85028e-06	Up	30	15	142	13	13	63.4	4.46862e+07	4.2257e+07	5.63035e+07	6.23209e+07	5.99408e+07	6.35129e+07	0.6142	0.637515	0.67614	2.0268	2.17063	1.99372
P55735	Protein SEC13 homolog OS=Homo sapiens OX=9606 GN=SEC13 PE=1 SV=3	SEC13	3.20437	5.46506e-06	Up	55	12	167	12	12	35.5	1.23048e+08	1.03543e+08	1.40797e+08	1.69493e+08	1.39847e+08	1.67771e+08	0.746866	0.689838	0.746666	2.43424	2.2364	2.32568
P35221	Catenin alpha-1 OS=Homo sapiens OX=9606 GN=CTNNA1 PE=1 SV=1	CTNNA1	3.20081	1.23865e-07	Up	57	44	633	34	43	100	1.75458e+08	1.5835e+08	1.95913e+08	2.39642e+08	2.1055e+08	2.38224e+08	0.705926	0.699296	0.688674	2.28134	2.23187	2.18896
Q9Y6E0	Serine/threonine-protein kinase 24 OS=Homo sapiens OX=9606 GN=STK24 PE=1 SV=1	STK24	3.20049	0.000733459	Up	23	8	47	6	8	49.3	9.16688e+06	8.60632e+06	1.09116e+07	1.01552e+07	1.39362e+07	1.28459e+07	0.638024	0.657489	0.663542	1.67242	2.55556	2.04195
P15529	Membrane cofactor protein OS=Homo sapiens OX=9606 GN=CD46 PE=1 SV=3	CD46	3.19589	1.90377e-06	Up	11	4	37	4	4	43.7	4.38251e+06	3.92775e+06	4.78498e+06	5.75642e+06	5.00949e+06	6.27287e+06	0.756041	0.74374	0.721219	2.34972	2.27689	2.47146
Q96QG7	Myotubularin-related protein 9 OS=Homo sapiens OX=9606 GN=MTMR9 PE=1 SV=1	MTMR9	3.1931	0.00159238	Up	12	7	25	7	7	63.4	4.3073e+06	4.53875e+06	5.1652e+06	7.03399e+06	6.30901e+06	4731329	0.619475	0.716492	0.64904	2.39366	2.39061	1.55406
P10321	HLA class I histocompatibility antigen, C alpha chain OS=Homo sapiens OX=9606 GN=HLA-C PE=1 SV=3	HLA-C	3.18683	0.000573754	Up	30	9	152	4	7	40.6	4.64345e+07	5.13713e+07	4.40287e+07	6.83767e+07	5.597e+07	6.17437e+07	0.478474	0.581024	0.396386	1.66712	1.5195	1.45303
Q8NEY1	Neuron navigator 1 OS=Homo sapiens OX=9606 GN=NAV1 PE=1 SV=2	NAV1	3.18622	7.52887e-05	Up	4	6	23	6	6	202.3	5.36999e+06	4.54649e+06	5.1975e+06	6.58163e+06	6.56879e+06	6.39253e+06	0.45353	0.421468	0.383523	1.31524	1.46166	1.23302
O43572	A-kinase anchor protein 10, mitochondrial OS=Homo sapiens OX=9606 GN=AKAP10 PE=1 SV=2	AKAP10	3.17844	0.0148026	Up	9	4	10	4	4	73.8	607169	729773	1.21755e+06	1.25352e+06	862338		0.526654	0.694798	0.922711	2.57269	1.9707
P48307	Tissue factor pathway inhibitor 2 OS=Homo sapiens OX=9606 GN=TFPI2 PE=1 SV=1	TFPI2	3.16381	0.000585362	Up	46	8	71	8	8	26.9	8.91662e+06	7.65278e+06	9.06147e+06	1.09111e+07	8.32677e+06	1.40459e+07	0.485082	0.456972	0.430704	1.40451	1.19349	1.74514
Q9BY67	Cell adhesion molecule 1 OS=Homo sapiens OX=9606 GN=CADM1 PE=1 SV=2	CADM1	3.16248	0.0253916	Up	21	5	44	5	5	48.5	8.08614e+06	2.6812e+06	2934849	5.74312e+06	4.89401e+06	7.22706e+06	1.13124	0.411716	0.358726	1.90108	1.80387	2.30908
Q96GP6	Scavenger receptor class F member 2 OS=Homo sapiens OX=9606 GN=SCARF2 PE=1 SV=5	SCARF2	3.16238	0.00202195	Up	5	2	6	2	2	92.3	799149	894844	1.09716e+06	1.09724e+06		1.39253e+06	0.753836	0.926514	0.904244	2.44901		2.99997
Q9BTY2	Plasma alpha-L-fucosidase OS=Homo sapiens OX=9606 GN=FUCA2 PE=1 SV=2	FUCA2	3.15751	4.25277e-05	Up	19	8	33	8	8	54	6.33858e+06	7.02249e+06	8.08262e+06	9.16947e+06	8.75618e+06	9.58223e+06	0.519637	0.63191	0.578929	1.77866	1.89126	1.79407
P50995	Annexin A11 OS=Homo sapiens OX=9606 GN=ANXA11 PE=1 SV=1	ANXA11	3.15014	2.37776e-05	Up	36	19	356	18	19	54.4	1.0847e+08	9.73044e+07	1.17018e+08	141221867	1.36902e+08	1.33708e+08	0.69255	0.681915	0.652771	2.13346	2.30293	1.94969
P62330	ADP-ribosylation factor 6 OS=Homo sapiens OX=9606 GN=ARF6 PE=1 SV=2	ARF6	3.15011	0.000337407	Up	60	6	94	6	6	20.1	2.95524e+07	2.28705e+07	2.4428e+07	3.24442e+07	2.9108e+07	3.76323e+07	0.736465	0.625591	0.531879	1.9131	1.91117	2.14183
P78559	Microtubule-associated protein 1A OS=Homo sapiens OX=9606 GN=MAP1A PE=1 SV=6	MAP1A	3.14987	1.98162e-06	Up	30	59	417	57	57	305.3	1.16356e+08	1.1186e+08	1.29456e+08	1.60028e+08	1.40195e+08	1.58286e+08	0.752091	0.793617	0.731087	2.44748	2.3875	2.33663
Q8IZ81	ELMO domain-containing protein 2 OS=Homo sapiens OX=9606 GN=ELMOD2 PE=1 SV=1	ELMOD2	3.14318	4.513e-05	Up	37	12	119	12	12	34.9	4.1465e+07	3.78474e+07	5.61995e+07	5.644e+07	5.47529e+07	6.01803e+07	0.532617	0.533611	0.630712	1.71538	1.85297	1.76544
Q92692	Nectin-2 OS=Homo sapiens OX=9606 GN=NECTIN2 PE=1 SV=1	NECTIN2	3.13908	8.31627e-06	Up	26	11	85	11	11	57.7	1.52181e+07	1.44764e+07	1.67795e+07	1.98561e+07	1.93131e+07	2.00556e+07	0.745584	0.778494	0.718259	2.30182	2.49297	2.24408
Q02543	60S ribosomal protein L18a OS=Homo sapiens OX=9606 GN=RPL18A PE=1 SV=2	RPL18A	3.13641	1.05386e-05	Up	47	10	294	10	10	20.7	1.58735e+08	1.39948e+08	1.65187e+08	2.12692e+08	1.81046e+08	1.97934e+08	0.7207	0.697432	0.655272	2.28493	2.16569	2.05242
Q86U44	N6-adenosine-methyltransferase catalytic subunit OS=Homo sapiens OX=9606 GN=METTL3 PE=1 SV=2	METTL3	3.13416	0.00031744	Up	18	7	27	7	7	64.4	3.33549e+06	3.87818e+06	4.03589e+06	5444436	3.89873e+06	5119833	0.620377	0.791735	0.655845	2.39602	1.9105	2.17479
P08238	Heat shock protein HSP 90-beta OS=Homo sapiens OX=9606 GN=HSP90AB1 PE=1 SV=4	HSP90AB1	3.12683	0.000102535	Up	61	48	1607	28	28	83.2	9.59581e+08	1.0096e+09	1.18241e+09	1.21717e+09	1.23925e+09	1.55474e+09	0.735262	0.849117	0.791581	2.20674	2.50176	2.72072
Q92542	Nicastrin OS=Homo sapiens OX=9606 GN=NCSTN PE=1 SV=2	NCSTN	3.11603	0.000262198	Up	17	8	99	8	8	78.4	1.25645e+07	9.8279e+06	1.36494e+07	1.67804e+07	1.49143e+07	1.35414e+07	0.619574	0.53194	0.588064	1.9579	1.93765	1.52502
Q9Y624	Junctional adhesion molecule A OS=Homo sapiens OX=9606 GN=F11R PE=1 SV=1	F11R	3.1145	0.00401179	Up	6	2	7	2	2	32.6	729834	915279	1.06258e+06	1.45756e+06	1.08482e+06	869807	0.569489	0.783918	0.724414	2.69109	2.23021	1.55006
P62753	40S ribosomal protein S6 OS=Homo sapiens OX=9606 GN=RPS6 PE=1 SV=1	RPS6	3.11437	7.79259e-06	Up	38	10	222	10	10	28.7	1.65162e+08	1.57088e+08	1.90007e+08	2.23515e+08	1.85219e+08	2.4149e+08	0.73211	0.764304	0.735868	2.3443	2.16311	2.44473
O75882	Attractin OS=Homo sapiens OX=9606 GN=ATRN PE=1 SV=2	ATRN	3.10701	0.00547949	Up	3	4	12	4	4	158.4	1.23292e+06	1.21381e+06	901408	1.86876e+06	1.1575e+06	1.28984e+06	0.614486	0.664019	0.39252	2.20379	1.51993	1.46817
P51178	1-phosphatidylinositol 4,5-bisphosphate phosphodiesterase delta-1 OS=Homo sapiens OX=9606 GN=PLCD1 PE=1 SV=2	PLCD1	3.10672	0.00726519	Up	15	7	29	7	7	85.6	1.98001e+06	2.06098e+06	1.22597e+06	2.13384e+06	2155284	2.53065e+06	0.690927	0.789395	0.373774	1.76185	1.98152	2.0168
P25786	Proteasome subunit alpha type-1 OS=Homo sapiens OX=9606 GN=PSMA1 PE=1 SV=1	PSMA1	3.09897	3.19317e-05	Up	75	17	374	17	17	29.5	2.28513e+08	2.10402e+08	2.44159e+08	3.06044e+08	2.77575e+08	2.75614e+08	0.744301	0.752216	0.694824	2.35864	2.38202	2.05024
Q7LBR1	Charged multivesicular body protein 1b OS=Homo sapiens OX=9606 GN=CHMP1B PE=1 SV=1	CHMP1B	3.09741	4.46627e-05	Up	13	3	17	3	3	22.1	1.34443e+07	13057135	1.54544e+07	1.61135e+07	1.73809e+07	1.92385e+07	0.602019	0.641762	0.604629	1.70727	2.05054	1.96746
Q8WUX1	Sodium-coupled neutral amino acid transporter 5 OS=Homo sapiens OX=9606 GN=SLC38A5 PE=1 SV=1	SLC38A5	3.08105	0.0342885	Up	4	2	9	2	2	51.4	1.04876e+06	821076	400987	1.2247e+06	956208	731376	0.919772	0.790396	0.307256	2.54141	2.20946	1.46491
P35222	Catenin beta-1 OS=Homo sapiens OX=9606 GN=CTNNB1 PE=1 SV=1	CTNNB1	3.07954	5.03832e-06	Up	55	30	533	25	31	85.4	1.41881e+08	1.2767e+08	1.75187e+08	1.88397e+08	1.6378e+08	2.02535e+08	0.713984	0.705195	0.770249	2.24326	2.17146	2.32771
Q9C0B5	Palmitoyltransferase ZDHHC5 OS=Homo sapiens OX=9606 GN=ZDHHC5 PE=1 SV=2	ZDHHC5	3.07892	0.00134482	Up	11	6	43	6	6	77.5	2.15169e+06	1.80723e+06	2.38525e+06	2.87267e+06	1.82181e+06	3.30667e+06	0.750871	0.692236	0.727254	2.37199	1.67501	2.63537
Q96NE9	FERM domain-containing protein 6 OS=Homo sapiens OX=9606 GN=FRMD6 PE=1 SV=1	FRMD6	3.0778	0.000484147	Up	17	9	55	9	9	72	5.06393e+06	5655673	7.464e+06	7.23166e+06	6.28836e+06	9.23216e+06	0.648091	0.79449	0.834612	2.18991	2.12038	2.69846
Q9Y6E2	Basic leucine zipper and W2 domain-containing protein 2 OS=Homo sapiens OX=9606 GN=BZW2 PE=1 SV=1	BZW2	3.07476	0.000153298	Up	40	17	119	15	15	48.1	2.46854e+07	27870516	2.93942e+07	3.53255e+07	3.3891e+07	3.33e+07	0.635103	0.787054	0.660741	2.15047	2.29729	1.95665
P15927	Replication protein A 32 kDa subunit OS=Homo sapiens OX=9606 GN=RPA2 PE=1 SV=1	RPA2	3.07425	0.000134389	Up	21	4	27	4	4	29.2	1.3956e+07	1.33517e+07	1.72986e+07	1.69131e+07	16341912	2.24829e+07	0.74469	0.781998	0.806477	2.1354	2.29745	2.73988
Q9NYK5	39S ribosomal protein L39, mitochondrial OS=Homo sapiens OX=9606 GN=MRPL39 PE=1 SV=3	MRPL39	3.06831	0.0016433	Up	45	12	129	12	12	38.7	2.43075e+07	1.60556e+07	2.98459e+07	2.45397e+07	2.7831e+07	3.38365e+07	0.831452	0.602811	0.891964	1.98613	2.50816	2.64331
Q14517	Protocadherin Fat 1 OS=Homo sapiens OX=9606 GN=FAT1 PE=1 SV=2	FAT1	3.06202	0.0164129	Up	3	7	30	7	7	506	2.07499e+06	1.09353e+06	1.14124e+06	2.08471e+06	1.97866e+06	1.28569e+06	1.13675	0.65756	0.546249	2.7023	2.85593	1.60861
P62249	40S ribosomal protein S16 OS=Homo sapiens OX=9606 GN=RPS16 PE=1 SV=2	RPS16	3.06094	1.44189e-05	Up	63	12	237	12	12	16.4	2.20197e+08	2.23577e+08	2.46723e+08	3.04512e+08	2.57408e+08	3.00503e+08	0.685505	0.763978	0.671077	2.24307	2.11129	2.13654
Q9UP95	Solute carrier family 12 member 4 OS=Homo sapiens OX=9606 GN=SLC12A4 PE=1 SV=2	SLC12A4	3.05685	0.00116283	Up	19	19	257	13	19	120.6	4.15867e+07	3.36761e+07	4.72247e+07	5.85216e+07	5.10995e+07	4.07836e+07	0.6689	0.594544	0.663653	2.22722	2.16546	1.49816
O60343	TBC1 domain family member 4 OS=Homo sapiens OX=9606 GN=TBC1D4 PE=1 SV=2	TBC1D4	3.05607	0.00117955	Up	3	3	18	2	2	146.5	1.11534e+06	882290	1.53756e+06	1204818	1.44604e+06	1.66955e+06	0.72931	0.633244	0.878419	1.86409	2.49122	2.49326
Q5JRA6	Transport and Golgi organization protein 1 homolog OS=Homo sapiens OX=9606 GN=MIA3 PE=1 SV=1	MIA3	3.05387	7.08298e-05	Up	20	33	257	33	33	213.6	8.95673e+07	8.7231e+07	1.2227e+08	1.28528e+08	1.03985e+08	1.37524e+08	0.639926	0.68408	0.763247	2.17279	1.9574	2.24401
Q9BSQ5	Cerebral cavernous malformations 2 protein OS=Homo sapiens OX=9606 GN=CCM2 PE=1 SV=1	CCM2	3.04777	0.000278152	Up	7	2	8	2	2	48.8	924763	643653	849531	932634	955809	1.09853e+06	0.837136	0.639547	0.671907	1.99764	2.27963	2.27113
O43292	Glycosylphosphatidylinositol anchor attachment 1 protein OS=Homo sapiens OX=9606 GN=GPAA1 PE=1 SV=3	GPAA1	3.0313	0.00545049	Up	5	3	13	3	3	67.6	1.23644e+06	1.19869e+06	1408689	1.92394e+06	947843	1.9343e+06	0.70497	0.750168	0.701741	2.59555	1.42384	2.51876
Q8N1F8	Serine/threonine-protein kinase 11-interacting protein OS=Homo sapiens OX=9606 GN=STK11IP PE=1 SV=4	STK11IP	3.02044	0.0150863	Up	7	5	15	5	5	120.2	1.99341e+06	1.52136e+06	960994	2.20437e+06	1.39145e+06	2.06624e+06	0.865912	0.725377	0.364722	2.2657	1.59247	2.04985
O96005	Cleft lip and palate transmembrane protein 1 OS=Homo sapiens OX=9606 GN=CLPTM1 PE=1 SV=1	CLPTM1	3.01792	0.000749958	Up	22	11	108	11	11	76	3.49431e+07	3.23301e+07	4.17944e+07	4.64008e+07	3.24248e+07	5.58414e+07	0.740854	0.752375	0.774202	2.32776	1.81124	2.70391
Q8N3C0	Activating signal cointegrator 1 complex subunit 3 OS=Homo sapiens OX=9606 GN=ASCC3 PE=1 SV=3	ASCC3	3.01666	7.70415e-06	Up	26	43	322	43	43	251.3	5.62319e+07	5.31102e+07	6.19556e+07	7.50549e+07	6.49616e+07	7.00751e+07	0.729511	0.756281	0.702255	2.30393	2.22041	2.07624
Q9H4G4	Golgi-associated plant pathogenesis-related protein 1 OS=Homo sapiens OX=9606 GN=GLIPR2 PE=1 SV=3	GLIPR2	3.01573	4.06376e-05	Up	45	5	70	5	5	17.2	1.46266e+07	1.49807e+07	1.60687e+07	1.80661e+07	1.73671e+07	2.0813e+07	0.654452	0.735736	0.628172	1.91266	2.04733	2.12683
O15254	Peroxisomal acyl-coenzyme A oxidase 3 OS=Homo sapiens OX=9606 GN=ACOX3 PE=1 SV=2	ACOX3	3.01225	0.000282814	Up	21	10	94	10	10	77.6	1.04907e+07	1.16928e+07	1.21665e+07	1.45822e+07	1.14185e+07	1.65044e+07	0.688671	0.842523	0.697813	2.26502	1.9749	2.47441
P42766	60S ribosomal protein L35 OS=Homo sapiens OX=9606 GN=RPL35 PE=1 SV=2	RPL35	3.00731	0.000182138	Up	40	6	163	6	6	14.5	1.3661e+08	1.10753e+08	1.20047e+08	1.55815e+08	1.44632e+08	1.49792e+08	0.86103	0.766209	0.66108	2.32374	2.40175	2.1562
P55268	Laminin subunit beta-2 OS=Homo sapiens OX=9606 GN=LAMB2 PE=1 SV=2	LAMB2	3.00617	1.3446e-06	Up	36	47	497	47	47	195.9	1.46157e+08	1.27699e+08	1.61289e+08	1.80797e+08	1.56919e+08	1.94033e+08	0.781656	0.749617	0.753646	2.28785	2.21106	2.36994
O95297	Myelin protein zero-like protein 1 OS=Homo sapiens OX=9606 GN=MPZL1 PE=1 SV=1	MPZL1	3.00588	4.32403e-06	Up	26	5	60	5	5	29.1	1.15915e+07	1.03618e+07	1.27646e+07	1.38305e+07	1.3738e+07	1.47264e+07	0.659289	0.646887	0.634319	1.86129	2.05867	1.91293
P07093	Glia-derived nexin OS=Homo sapiens OX=9606 GN=SERPINE2 PE=1 SV=1	SERPINE2	3.00497	2.11855e-07	Up	40	16	194	16	16	44	2.95328e+07	2.78831e+07	3.3998e+07	3.72561e+07	3.45233e+07	3.97852e+07	0.46053	0.477253	0.463202	1.37465	1.41838	1.4169
Q66K14	TBC1 domain family member 9B OS=Homo sapiens OX=9606 GN=TBC1D9B PE=1 SV=3	TBC1D9B	3.00157	0.0160174	Up	7	7	32	7	7	140.4	3.32207e+06	3.60702e+06	4.54837e+06	5.1245e+06	2466825	6.63733e+06	0.292917	0.349092	0.350393	1.06912	0.573062	1.33658
Q16658	Fascin OS=Homo sapiens OX=9606 GN=FSCN1 PE=1 SV=3	FSCN1	2.98733	5.42195e-05	Up	60	26	477	26	26	54.5	4.28984e+08	3.99409e+08	4.53149e+08	4.78355e+08	4.98477e+08	5.81798e+08	0.75187	0.768379	0.693917	1.98378	2.30184	2.32884
O00422	Histone deacetylase complex subunit SAP18 OS=Homo sapiens OX=9606 GN=SAP18 PE=1 SV=1	SAP18	2.98246	0.000181147	Up	32	5	43	5	5	17.6	1.7419e+07	2.06635e+07	2.25591e+07	2.45135e+07	2.39538e+07	25075161	0.692217	0.901319	0.783261	2.30498	2.50796	2.27577
Q86TM6	E3 ubiquitin-protein ligase synoviolin OS=Homo sapiens OX=9606 GN=SYVN1 PE=1 SV=2	SYVN1	2.98144	0.0104681	Up	11	6	46	6	6	67.6	2.98313e+06	5.86379e+06	3.42659e+06	5.24182e+06	4.68692e+06	5.36723e+06	0.483389	1.04294	0.485122	2.00977	2.00096	1.98627
Q04721	Neurogenic locus notch homolog protein 2 OS=Homo sapiens OX=9606 GN=NOTCH2 PE=1 SV=3	NOTCH2	2.97179	2.54698e-06	Up	12	20	126	19	20	265.2	1.4731e+07	1.3398e+07	1.6845e+07	17961242	1.61366e+07	2.02312e+07	0.653282	0.652174	0.652683	1.88471	1.88541	2.04906
P39748	Flap endonuclease 1 OS=Homo sapiens OX=9606 GN=FEN1 PE=1 SV=1	FEN1	2.96607	0.000496279	Up	31	8	31	8	8	42.6	8.69797e+06	1.03456e+07	1.17947e+07	1.10311e+07	1.16671e+07	1.45394e+07	0.70712	0.923184	0.837771	2.12195	2.499	2.69953
Q9H7B4	Histone-lysine N-methyltransferase SMYD3 OS=Homo sapiens OX=9606 GN=SMYD3 PE=1 SV=4	SMYD3	2.96236	0.00472087	Up	7	3	9	3	3	49.1	1.57813e+06	2.14269e+06	1519056	2.22304e+06	1.63797e+06	2.62637e+06	0.792046	1.18038	0.666111	2.63995	2.16591	3.01043
P46781	40S ribosomal protein S9 OS=Homo sapiens OX=9606 GN=RPS9 PE=1 SV=3	RPS9	2.95957	2.33545e-05	Up	49	14	351	14	14	22.6	2.67978e+08	2.6708e+08	3.18526e+08	3.33016e+08	3.40237e+08	3.50277e+08	0.69447	0.759715	0.721215	2.04202	2.32308	2.07315
Q14112	Nidogen-2 OS=Homo sapiens OX=9606 GN=NID2 PE=1 SV=3	NID2	2.95462	1.8857e-05	Up	24	23	212	23	23	151.2	3.54931e+07	2.95312e+07	4.33618e+07	4.41365e+07	4.00042e+07	4.49883e+07	0.79495	0.725995	0.848534	2.33903	2.36064	2.30123
P35527	Keratin, type I cytoskeletal 9 OS=Homo sapiens OX=9606 GN=KRT9 PE=1 SV=3	KRT9	2.95245	0.000108056	Up	51	20	244	19	19	62	4.67921e+07	4.76782e+07	5.54858e+07	5.76486e+07	5.13898e+07	7.18054e+07	0.683246	0.764154	0.707868	1.99175	1.97701	2.39457
Q9Y3T9	Nucleolar complex protein 2 homolog OS=Homo sapiens OX=9606 GN=NOC2L PE=1 SV=4	NOC2L	2.94752	0.00041085	Up	14	10	39	10	10	84.9	1.23244e+07	1.47893e+07	1.90164e+07	1.76563e+07	1.73431e+07	1.99994e+07	0.71952	0.947718	0.969994	2.43904	2.66766	2.6666
P36578	60S ribosomal protein L4 OS=Homo sapiens OX=9606 GN=RPL4 PE=1 SV=5	RPL4	2.93845	3.7413e-06	Up	43	19	559	19	19	47.7	4.4301e+08	4.068e+08	5.09428e+08	5.6459e+08	5.14524e+08	5.3865e+08	0.732788	0.738587	0.736228	2.20973	2.24232	2.03487
Q9UDR5	Alpha-aminoadipic semialdehyde synthase, mitochondrial OS=Homo sapiens OX=9606 GN=AASS PE=1 SV=1	AASS	2.93266	0.00892588	Up	8	6	22	6	6	102.1	3.49336e+06	1.4826e+06	2600814	2.59876e+06	3.04876e+06	3.28385e+06	0.883662	0.411644	0.574801	1.55543	2.03186	1.8971
Q8TCT9	Minor histocompatibility antigen H13 OS=Homo sapiens OX=9606 GN=HM13 PE=1 SV=1	HM13	2.93156	0.000200626	Up	29	9	194	9	9	41.5	1.02508e+08	1.06192e+08	1.22534e+08	1.41423e+08	1.31752e+08	1.20108e+08	0.687118	0.781307	0.717617	2.24303	2.3268	1.8387
P13497	Bone morphogenetic protein 1 OS=Homo sapiens OX=9606 GN=BMP1 PE=1 SV=2	BMP1	2.92884	4.96227e-05	Up	14	11	29	11	11	111.2	6.76111e+07	6.61238e+07	9.25958e+07	8.85979e+07	8.61198e+07	9.23931e+07	0.705328	0.757158	0.843974	2.18694	2.36703	2.20129
P29966	Myristoylated alanine-rich C-kinase substrate OS=Homo sapiens OX=9606 GN=MARCKS PE=1 SV=4	MARCKS	2.92778	0.000360046	Up	24	6	78	6	6	31.5	6.43515e+07	6.92569e+07	6.37306e+07	86207771	6.87793e+07	8.26704e+07	0.879473	1.03892	0.760986	2.78773	2.47656	2.58035
O15355	Protein phosphatase 1G OS=Homo sapiens OX=9606 GN=PPM1G PE=1 SV=1	PPM1G	2.92655	4.63668e-05	Up	25	11	54	11	11	59.2	2.33379e+07	2.29902e+07	2.53937e+07	2.72057e+07	28301365	29837072	0.846411	0.915205	0.804659	2.33465	2.7043	2.47139
P21796	Voltage-dependent anion-selective channel protein 1 OS=Homo sapiens OX=9606 GN=VDAC1 PE=1 SV=2	VDAC1	2.9257	7.7075e-06	Up	74	17	590	16	17	30.8	7.31401e+08	6.15413e+08	8.4879e+08	8.50172e+08	8.22065e+08	9.2315e+08	0.726439	0.670912	0.736561	1.99798	2.15118	2.09402
P29317	Ephrin type-A receptor 2 OS=Homo sapiens OX=9606 GN=EPHA2 PE=1 SV=2	EPHA2	2.92352	2.15834e-06	Up	39	28	310	27	28	108.2	9.88386e+07	9.25635e+07	1.11818e+08	1.23969e+08	1.05367e+08	1.31649e+08	0.800182	0.822541	0.790929	2.37474	2.24748	2.43413
O75460	Serine/threonine-protein kinase/endoribonuclease IRE1 OS=Homo sapiens OX=9606 GN=ERN1 PE=1 SV=2	ERN1	2.91713	0.00253732	Up	7	4	15	4	4	109.7	252469	355720	269066	364954	342270	348512	0.309163	0.478128	0.287875	1.05745	1.10427	0.974681
Q9NVM9	Integrator complex subunit 13 OS=Homo sapiens OX=9606 GN=INTS13 PE=1 SV=2	INTS13	2.91348	1.97713e-05	Up	8	5	19	5	5	80.2	1.38677e+07	1.21165e+07	1.46807e+07	1.6609e+07	1.36629e+07	1.80502e+07	0.687882	0.659695	0.636242	1.94938	1.78559	2.04484
Q9ULP9	TBC1 domain family member 24 OS=Homo sapiens OX=9606 GN=TBC1D24 PE=1 SV=2	TBC1D24	2.91043	0.00178244	Up	12	4	18	4	4	62.9	9.88369e+06	9.2559e+06	1.65433e+07	1.29989e+07	1.16505e+07	1.70542e+07	0.487756	0.50137	0.713296	1.51786	1.5148	1.92212
Q13107	Ubiquitin carboxyl-terminal hydrolase 4 OS=Homo sapiens OX=9606 GN=USP4 PE=1 SV=3	USP4	2.90993	2.42916e-05	Up	13	10	31	9	9	108.5	3.60602e+06	3.7426e+06	4.79705e+06	4.94323e+06	4.29823e+06	5.08905e+06	0.673783	0.767576	0.783126	2.18547	2.11597	2.17167
P55287	Cadherin-11 OS=Homo sapiens OX=9606 GN=CDH11 PE=1 SV=2	CDH11	2.90677	0.000130214	Up	21	12	92	12	12	87.9	1.04095e+07	9.55157e+06	1.01826e+07	1.15329e+07	1.04287e+07	1.39364e+07	0.595346	0.599614	0.508821	1.5607	1.57144	1.82036
Q9HBL0	Tensin-1 OS=Homo sapiens OX=9606 GN=TNS1 PE=1 SV=2	TNS1	2.90181	6.54904e-06	Up	45	49	444	48	49	185.6	1.49299e+08	1.39069e+08	1.74181e+08	1.97799e+08	1.58511e+08	1.8922e+08	0.779914	0.797401	0.794979	2.44486	2.18161	2.25748
O43824	Putative GTP-binding protein 6 OS=Homo sapiens OX=9606 GN=GTPBP6 PE=1 SV=4	GTPBP6	2.9001	5.89916e-06	Up	4	2	4	2	2	56.9	3.81807e+06	3.6096e+06	4.56428e+06	4.75013e+06	4.57068e+06	4749168	0.78265	0.812154	0.81745	2.30393	2.4685	2.22334
O75044	SLIT-ROBO Rho GTPase-activating protein 2 OS=Homo sapiens OX=9606 GN=SRGAP2 PE=1 SV=3	SRGAP2	2.89968	0.00056953	Up	18	11	45	10	11	120.8	2.03509e+07	1.38444e+07	2.01246e+07	2.34704e+07	1.70321e+07	2.34918e+07	0.847516	0.632844	0.732247	2.31274	1.86879	2.23432
Q96FZ7	Charged multivesicular body protein 6 OS=Homo sapiens OX=9606 GN=CHMP6 PE=1 SV=3	CHMP6	2.89778	0.000536921	Up	16	3	39	3	3	23.5	4.2119e+06	3.7832e+06	3.7511e+06	5.16769e+06	4.43683e+06	4.29902e+06	0.824236	0.812622	0.641355	2.39283	2.28757	1.92136
P61313	60S ribosomal protein L15 OS=Homo sapiens OX=9606 GN=RPL15 PE=1 SV=2	RPL15	2.89736	5.61967e-06	Up	50	12	371	12	12	24.1	2.98922e+08	2.72216e+08	3.48614e+08	3.81932e+08	3.39566e+08	3.57267e+08	0.738549	0.738229	0.752544	2.23279	2.21041	2.01595
Q8TCE6	DENN domain-containing protein 10 OS=Homo sapiens OX=9606 GN=DENND10 PE=1 SV=1	DENND10	2.89732	0.000220093	Up	16	4	18	4	4	40.5	1.44541e+06	1.68599e+06	1.80649e+06	2.13669e+06	1.65588e+06	2.05972e+06	0.629926	0.806505	0.687857	2.20334	1.90132	2.05008
Q9BYI3	Hyccin OS=Homo sapiens OX=9606 GN=FAM126A PE=1 SV=2	FAM126A	2.89684	0.000930027	Up	10	4	19	4	4	57.6	2.00334e+06	1.19867e+06	1.94712e+06	2.01422e+06	1.87867e+06	2.11365e+06	0.298815	0.196247	0.25375	0.71088	0.738288	0.720022
Q9H8H3	Methyltransferase-like protein 7A OS=Homo sapiens OX=9606 GN=METTL7A PE=1 SV=1	METTL7A	2.89648	0.00034335	Up	14	2	13	2	2	28.3	2.03228e+06	1.65047e+06	2.64494e+06	2.41575e+06	2534637	2.37899e+06	0.658975	0.58742	0.749317	1.85344	2.16535	1.76175
Q969Q0	60S ribosomal protein L36a-like OS=Homo sapiens OX=9606 GN=RPL36AL PE=1 SV=3	RPL36AL	2.88572	8.5375e-06	Up	40	7	83	2	2	12.5	9.08425e+06	7760454	1.03022e+07	1.01626e+07	9.9918e+06	11558994	0.76245	0.714933	0.755473	2.01822	2.2095	2.21568
P62195	26S proteasome regulatory subunit 8 OS=Homo sapiens OX=9606 GN=PSMC5 PE=1 SV=1	PSMC5	2.88445	9.31421e-06	Up	63	24	333	23	24	45.6	1.46978e+08	1.39178e+08	1.79943e+08	1.92302e+08	156303061	1.97586e+08	0.719575	0.747909	0.769702	2.22766	2.01613	2.20925
P35520	Cystathionine beta-synthase OS=Homo sapiens OX=9606 GN=CBS PE=1 SV=2	CBS	2.87095	0.00183052	Up	14	6	21	6	6	60.5	7.21968e+06	7789883	7675370	7.68039e+06	1.0245e+07	8.47811e+06	0.872624	1.03346	0.810537	2.19651	3.26249	2.34031
P18621	60S ribosomal protein L17 OS=Homo sapiens OX=9606 GN=RPL17 PE=1 SV=3	RPL17	2.86036	3.22066e-06	Up	47	9	346	9	9	21.4	2.45185e+08	2.27509e+08	2.7071e+08	2.81719e+08	2.66942e+08	3.16244e+08	0.759809	0.773863	0.73296	2.0657	2.17949	2.23819
Q15751	Probable E3 ubiquitin-protein ligase HERC1 OS=Homo sapiens OX=9606 GN=HERC1 PE=1 SV=2	HERC1	2.85905	0.000541431	Up	1	2	5	2	2	531.9	765499	554190	753103	769471	853367	761856	0.83291	0.661863	0.715934	1.98101	2.44634	1.89318
P18077	60S ribosomal protein L35a OS=Homo sapiens OX=9606 GN=RPL35A PE=1 SV=2	RPL35A	2.85904	3.82507e-05	Up	52	7	188	7	7	12.5	1.58103e+08	1.5906e+08	1.83197e+08	1.99075e+08	1.9111e+08	1.9014e+08	0.722674	0.798029	0.731619	2.15308	2.3015	1.98491
Q99755	Phosphatidylinositol 4-phosphate 5-kinase type-1 alpha OS=Homo sapiens OX=9606 GN=PIP5K1A PE=1 SV=1	PIP5K1A	2.85817	0.00336829	Up	17	8	68	5	5	62.6	2.38988e+06	3.84806e+06	3.29555e+06	4.04533e+06	3.16137e+06	4.04211e+06	0.566692	1.00154	0.682753	2.26968	1.97503	2.18899
P41221	Protein Wnt-5a OS=Homo sapiens OX=9606 GN=WNT5A PE=1 SV=2	WNT5A	2.8512	0.00123901	Up	44	15	105	11	15	42.3	8.26273e+06	8.89427e+06	1.29553e+07	1.22613e+07	8.80405e+06	1.37748e+07	0.345943	0.40874	0.473909	1.21467	0.97116	1.31714
Q9UGP8	Translocation protein SEC63 homolog OS=Homo sapiens OX=9606 GN=SEC63 PE=1 SV=2	SEC63	2.85055	8.66418e-05	Up	34	22	344	22	22	87.9	7.50796e+07	7.05714e+07	7.43635e+07	8.34676e+07	8.41511e+07	8.7932e+07	0.835592	0.862098	0.723098	2.19802	2.46751	2.23503
P62256	Ubiquitin-conjugating enzyme E2 H OS=Homo sapiens OX=9606 GN=UBE2H PE=1 SV=1	UBE2H	2.8437	0.00035103	Up	19	3	19	3	3	20.6	1.11421e+07	1.14203e+07	1.49972e+07	1.26949e+07	1.4948e+07	1.54002e+07	0.879721	0.989723	1.03456	2.37165	3.10949	2.77696
Q12959	Disks large homolog 1 OS=Homo sapiens OX=9606 GN=DLG1 PE=1 SV=2	DLG1	2.84345	0.00517377	Up	29	18	98	18	18	100.4	1.1069e+07	5.8172e+06	8.62838e+06	1.2003e+07	8.52711e+06	8.84423e+06	0.858222	0.495061	0.584499	2.20202	1.74188	1.56608
Q9BX67	Junctional adhesion molecule C OS=Homo sapiens OX=9606 GN=JAM3 PE=1 SV=1	JAM3	2.83602	3.79279e-06	Up	12	4	21	4	4	35	1.05308e+07	1.03612e+07	1.18917e+07	12991517	1.17052e+07	1.31382e+07	0.714209	0.771308	0.70465	2.0848	2.09156	2.035
Q9ULC3	Ras-related protein Rab-23 OS=Homo sapiens OX=9606 GN=RAB23 PE=1 SV=1	RAB23	2.83371	0.000401061	Up	47	9	115	9	9	26.6	3.26592e+07	2.32915e+07	3.36991e+07	3.44879e+07	2.81752e+07	4.05412e+07	0.779328	0.610053	0.702584	1.94725	1.77137	2.20941
Q9BX79	Receptor for retinol uptake STRA6 OS=Homo sapiens OX=9606 GN=STRA6 PE=1 SV=1	STRA6	2.83317	0.0104476	Up	10	4	22	4	4	73.5	1489822	1.61663e+06	2.19567e+06	2.03122e+06	2.52085e+06	1.41672e+06	0.527288	0.628029	0.678962	1.70102	2.35065	1.14515
Q6Y288	Beta-1,3-glucosyltransferase OS=Homo sapiens OX=9606 GN=B3GLCT PE=1 SV=2	B3GLCT	2.83014	0.0011305	Up	14	5	22	5	5	56.5	2.42434e+06	2.12977e+06	2.76638e+06	2394606	3.2166e+06	2.70466e+06	0.768911	0.741429	0.766582	1.79704	2.68786	1.95911
Q9H3Z4	DnaJ homolog subfamily C member 5 OS=Homo sapiens OX=9606 GN=DNAJC5 PE=1 SV=1	DNAJC5	2.8283	0.00111022	Up	28	4	36	4	4	22.1	4.32187e+06	4.28698e+06	3.57148e+06	4.90634e+06	4.40133e+06	4.8832e+06	0.649915	0.707605	0.469242	1.74575	1.7438	1.67708
P62070	Ras-related protein R-Ras2 OS=Homo sapiens OX=9606 GN=RRAS2 PE=1 SV=1	RRAS2	2.81985	0.000440707	Up	45	8	110	6	6	23.4	9.5265e+06	8.01428e+06	9.52003e+06	1.01919e+07	1.11302e+07	9.49434e+06	0.788473	0.728071	0.688425	1.99594	2.42708	1.79466
Q8IVH8	Mitogen-activated protein kinase kinase kinase kinase 3 OS=Homo sapiens OX=9606 GN=MAP4K3 PE=1 SV=1	MAP4K3	2.80739	0.00229648	Up	3	2	15	2	2	101.3	9.43943e+06	9.93326e+06	8.25358e+06	1.17168e+07	8.13206e+06	1.23497e+07	0.728636	0.841613	0.556637	2.14001	1.65384	2.17715
Q99757	Thioredoxin, mitochondrial OS=Homo sapiens OX=9606 GN=TXN2 PE=1 SV=2	TXN2	2.79567	0.000442911	Up	37	3	62	3	3	18.4	16828571	1.40051e+07	2.22184e+07	2.09876e+07	15905015	23088173	0.788358	0.720142	0.909396	2.32638	1.96308	2.47019
O75165	DnaJ homolog subfamily C member 13 OS=Homo sapiens OX=9606 GN=DNAJC13 PE=1 SV=5	DNAJC13	2.79266	1.43737e-06	Up	24	43	251	43	43	254.3	9.94474e+07	9.32351e+07	1.09432e+08	1.15389e+08	1.04144e+08	1.23965e+08	0.741282	0.762825	0.71269	2.03514	2.04527	2.11035
P62910	60S ribosomal protein L32 OS=Homo sapiens OX=9606 GN=RPL32 PE=1 SV=2	RPL32	2.78608	4.70773e-06	Up	48	9	152	9	9	15.9	1.17897e+08	9.9361e+07	1.28762e+08	1.35643e+08	1.14809e+08	1.41132e+08	0.782252	0.723627	0.74644	2.12952	2.007	2.13862
P17480	Nucleolar transcription factor 1 OS=Homo sapiens OX=9606 GN=UBTF PE=1 SV=1	UBTF	2.78369	3.72418e-05	Up	14	10	36	10	10	89.4	1.08129e+07	9.8904e+06	1.06294e+07	12081229	10921085	12615652	0.916958	0.920611	0.787552	2.42414	2.44006	2.44332
Q9NPH3	Interleukin-1 receptor accessory protein OS=Homo sapiens OX=9606 GN=IL1RAP PE=1 SV=2	IL1RAP	2.77985	0.00472341	Up	5	3	26	3	3	65.4	693349	760117	869141	1151360	798905	669280	0.529292	0.636912	0.579693	2.07967	1.60682	1.16685
P82979	SAP domain-containing ribonucleoprotein OS=Homo sapiens OX=9606 GN=SARNP PE=1 SV=3	SARNP	2.77355	0.000257636	Up	25	5	52	5	5	23.7	3.63233e+07	3.45904e+07	4.16649e+07	44424604	43590852	38116116	0.853751	0.892395	0.85562	2.47064	2.69941	2.04607
P11166	Solute carrier family 2, facilitated glucose transporter member 1 OS=Homo sapiens OX=9606 GN=SLC2A1 PE=1 SV=2	SLC2A1	2.77301	0.000112889	Up	17	8	162	8	8	54	3.27474e+07	2.69692e+07	4.157e+07	3.96005e+07	3.23542e+07	4.14514e+07	0.583017	0.527022	0.64662	1.6682	1.51762	1.68543
P51636	Caveolin-2 OS=Homo sapiens OX=9606 GN=CAV2 PE=1 SV=2	CAV2	2.7723	0.00466824	Up	25	2	19	2	2	18.3	652954	457155	528227	635099		649973	0.714936	0.549419	0.505324	1.64538		1.62534
P61221	ATP-binding cassette sub-family E member 1 OS=Homo sapiens OX=9606 GN=ABCE1 PE=1 SV=1	ABCE1	2.75528	0.000399737	Up	38	17	234	17	17	67.3	6.1367e+07	5.84827e+07	7.35165e+07	7.66023e+07	7.46232e+07	6.35189e+07	0.70913	0.741779	0.742234	2.09447	2.27192	1.67633
P48960	Adhesion G protein-coupled receptor E5 OS=Homo sapiens OX=9606 GN=ADGRE5 PE=1 SV=4	ADGRE5	2.74559	2.38403e-05	Up	16	9	86	9	9	91.8	1.11185e+07	1.14239e+07	1.40206e+07	1.45612e+07	1.24008e+07	13775827	0.849871	0.958467	0.936348	2.63355	2.49737	2.40485
Q5T0F9	Coiled-coil and C2 domain-containing protein 1B OS=Homo sapiens OX=9606 GN=CC2D1B PE=1 SV=1	CC2D1B	2.74443	0.00302139	Up	10	6	22	6	6	94.2	1.36251e+06	2.13204e+06	2.15352e+06	2.29578e+06	1.92128e+06	2.11549e+06	0.544669	0.935501	0.752156	2.17153	2.02354	1.93139
P33908	Mannosyl-oligosaccharide 1,2-alpha-mannosidase IA OS=Homo sapiens OX=9606 GN=MAN1A1 PE=1 SV=3	MAN1A1	2.73146	0.0133619	Up	9	4	22	3	3	72.9	413120	416156		463835	485303		0.412438	0.456031		1.09569	1.2765
O95864	Acyl-CoA 6-desaturase OS=Homo sapiens OX=9606 GN=FADS2 PE=1 SV=1	FADS2	2.7223	8.32714e-05	Up	14	5	37	5	5	52.2	5.70697e+06	5.85229e+06	6.38727e+06	6.23386e+06	6.4699e+06	7.18918e+06	0.810357	0.91212	0.792412	2.09444	2.42045	2.33139
Q14139	Ubiquitin conjugation factor E4 A OS=Homo sapiens OX=9606 GN=UBE4A PE=1 SV=2	UBE4A	2.72153	1.35861e-05	Up	19	15	74	15	15	122.5	1.26918e+07	1.05885e+07	1.36697e+07	1.46992e+07	1.22509e+07	1.38443e+07	0.870081	0.796761	0.818771	2.38436	2.21275	2.16757
O95299	NADH dehydrogenase [ubiquinone] 1 alpha subcomplex subunit 10, mitochondrial OS=Homo sapiens OX=9606 GN=NDUFA10 PE=1 SV=1	NDUFA10	2.71888	0.000107645	Up	44	14	73	14	14	40.7	3.88512e+07	3.38566e+07	4.00694e+07	4.3132e+07	4.1672e+07	3.94103e+07	0.704428	0.673801	0.634761	1.85043	1.99069	1.63195
Q9Y2T2	AP-3 complex subunit mu-1 OS=Homo sapiens OX=9606 GN=AP3M1 PE=1 SV=1	AP3M1	2.71716	7.35521e-06	Up	51	14	174	12	14	46.9	2.6809e+07	2.32324e+07	3.1638e+07	3.20062e+07	2.7163e+07	3.06261e+07	0.742088	0.70587	0.765153	2.09628	1.98098	1.93612
P11169	Solute carrier family 2, facilitated glucose transporter member 3 OS=Homo sapiens OX=9606 GN=SLC2A3 PE=1 SV=1	SLC2A3	2.70769	5.77874e-05	Up	7	3	36	3	3	53.9	3.69365e+06	3.63824e+06	4.82469e+06	4.20759e+06	4.34348e+06	4.74147e+06	0.564106	0.609892	0.643784	1.52048	1.74771	1.6538
O75935	Dynactin subunit 3 OS=Homo sapiens OX=9606 GN=DCTN3 PE=1 SV=1	DCTN3	2.70171	9.72213e-06	Up	39	7	110	7	7	21.1	3.27399e+07	2.97546e+07	34495651	3.71976e+07	3.33841e+07	3.59686e+07	0.780905	0.778988	0.71887	2.09931	2.09792	1.95934
Q9P266	Junctional protein associated with coronary artery disease OS=Homo sapiens OX=9606 GN=JCAD PE=1 SV=3	JCAD	2.69633	0.000393436	Up	23	21	106	21	21	148.3	1.70024e+07	1.79071e+07	1.89578e+07	2.06545e+07	1.57406e+07	2.32762e+07	0.735662	0.850452	0.716671	2.11458	1.7944	2.30009
Q92508	Piezo-type mechanosensitive ion channel component 1 OS=Homo sapiens OX=9606 GN=PIEZO1 PE=1 SV=4	PIEZO1	2.69436	7.23375e-05	Up	5	11	92	11	11	286.6	6.6901e+06	5.84442e+06	8.77286e+06	7.53295e+06	7.3472e+06	8.22314e+06	0.644163	0.617676	0.738023	1.71621	1.86386	1.80828
Q6ZS30	Neurobeachin-like protein 1 OS=Homo sapiens OX=9606 GN=NBEAL1 PE=2 SV=3	NBEAL1	2.69335	0.0358302	Up	2	3	20	3	3	307	1.21116e+06	1.85135e+06	1.79514e+06	2.23548e+06	903657	2.31595e+06	0.611246	1.02556	0.791549	2.66947	1.20156	2.66936
O75629	Protein CREG1 OS=Homo sapiens OX=9606 GN=CREG1 PE=1 SV=1	CREG1	2.69316	0.00316657	Up	25	4	38	4	4	24.1	3.05273e+06	2.82183e+06	2.72002e+06	2.56192e+06	3.59105e+06	3.25777e+06	0.426633	0.432865	0.332126	0.847173	1.32225	1.0398
O60565	Gremlin-1 OS=Homo sapiens OX=9606 GN=GREM1 PE=1 SV=1	GREM1	2.69028	0.000341023	Up	56	12	131	12	12	20.7	4.0943e+07	4.56141e+07	6.2417e+07	5.41411e+07	5.1669e+07	5.57476e+07	0.451899	0.552608	0.601908	1.41394	1.50252	1.40525
P19971	Thymidine phosphorylase OS=Homo sapiens OX=9606 GN=TYMP PE=1 SV=2	TYMP	2.67908	0.000239926	Up	47	17	236	17	17	49.9	6.92874e+07	7.74842e+07	9.24209e+07	9.04098e+07	8.55941e+07	8.33582e+07	0.610925	0.749898	0.711982	1.88621	1.98841	1.6786
P08582	Melanotransferrin OS=Homo sapiens OX=9606 GN=MELTF PE=1 SV=2	MELTF	2.67892	0.000169148	Up	20	11	41	11	11	80.2	4.92303e+06	3.65446e+06	4.75952e+06	5.28693e+06	4.35792e+06	4.85279e+06	0.543101	0.442515	0.458751	1.38004	1.26665	1.22266
Q9UBM7	7-dehydrocholesterol reductase OS=Homo sapiens OX=9606 GN=DHCR7 PE=1 SV=1	DHCR7	2.67886	0.00052948	Up	20	9	89	9	9	54.5	1.88311e+07	1.90454e+07	2.94074e+07	2.36163e+07	2.15838e+07	2.73795e+07	0.584173	0.648503	0.797055	1.73348	1.7641	1.9398
Q9BRZ2	E3 ubiquitin-protein ligase TRIM56 OS=Homo sapiens OX=9606 GN=TRIM56 PE=1 SV=3	TRIM56	2.67788	0.000838118	Up	11	6	40	6	6	81.4	3.66186e+07	3.90683e+07	5.82965e+07	5.14119e+07	4.69023e+07	4.55676e+07	0.623583	0.730251	0.867361	2.07155	2.10433	1.7722
Q68EM7	Rho GTPase-activating protein 17 OS=Homo sapiens OX=9606 GN=ARHGAP17 PE=1 SV=1	ARHGAP17	2.67781	0.000111658	Up	21	11	90	11	11	95.4	2.94117e+07	2.81535e+07	3.12145e+07	3.57664e+07	2.67262e+07	3.48078e+07	0.691777	0.726833	0.641456	1.9905	1.6562	1.86977
P04264	Keratin, type II cytoskeletal 1 OS=Homo sapiens OX=9606 GN=KRT1 PE=1 SV=6	KRT1	2.67532	0.000393163	Up	46	27	400	21	23	66	1.03623e+08	1.07644e+08	1.01915e+08	1.24787e+08	1.05372e+08	1.13257e+08	0.723828	0.825324	0.621985	2.06247	1.93923	1.80679
Q92643	GPI-anchor transamidase OS=Homo sapiens OX=9606 GN=PIGK PE=1 SV=2	PIGK	2.67123	0.0185844	Up	29	8	67	8	8	45.2	1.50475e+07	1.10094e+07	1.34988e+07	1.75017e+07	15883004	9.07305e+06	0.898388	0.72147	0.704143	2.47241	2.49839	1.23714
Q9Y5B8	Nucleoside diphosphate kinase 7 OS=Homo sapiens OX=9606 GN=NME7 PE=1 SV=1	NME7	2.66549	0.00104364	Up	17	6	17	6	6	42.5	3.01676e+06	3.45373e+06	3.30707e+06	3890095	3.53922e+06	3.2044e+06	0.640424	0.804768	0.613388	1.95401	1.97953	1.55359
Q9H1K1	Iron-sulfur cluster assembly enzyme ISCU, mitochondrial OS=Homo sapiens OX=9606 GN=ISCU PE=1 SV=2	ISCU	2.66365	0.00140726	Up	17	3	25	3	3	18	6.43738e+06	4.32129e+06	7.91191e+06	6.13182e+06	6.38329e+06	7.38554e+06	0.960875	0.707989	1.03182	2.16565	2.51032	2.5177
O43598	2'-deoxynucleoside 5'-phosphate N-hydrolase 1 OS=Homo sapiens OX=9606 GN=DNPH1 PE=1 SV=1	DNPH1	2.66283	0.00863904	Up	18	2	13	2	2	19.1	2.43005e+06	2.44204e+06	3398465	2.34803e+06	3815140	2.58669e+06	0.659351	0.727294	0.805655	1.50746	2.72734	1.60292
Q9BV68	E3 ubiquitin-protein ligase RNF126 OS=Homo sapiens OX=9606 GN=RNF126 PE=1 SV=2	RNF126	2.65203	0.000832471	Up	24	4	14	4	4	33.8	3.35973e+06	3.73893e+06	4.08116e+06	3.94365e+06	4.35081e+06	3.70259e+06	0.673001	0.822082	0.714267	1.86918	2.2962	1.69388
P62745	Rho-related GTP-binding protein RhoB OS=Homo sapiens OX=9606 GN=RHOB PE=1 SV=1	RHOB	2.65172	7.34458e-05	Up	25	5	121	3	3	22.1	3.77378e+06	3.95874e+06	4.77279e+06	4.96031e+06	4.00648e+06	4.50756e+06	0.821585	0.945995	0.907847	2.5552	2.29808	2.24121
Q8TAQ2	SWI/SNF complex subunit SMARCC2 OS=Homo sapiens OX=9606 GN=SMARCC2 PE=1 SV=1	SMARCC2	2.65035	0.000135778	Up	19	15	94	10	15	132.8	1.0614e+08	1.00263e+08	1.02315e+08	1.15234e+08	9.80672e+07	1.22107e+08	0.833461	0.864173	0.701951	2.14104	2.02888	2.18982
Q8N7R7	Cyclin-Y-like protein 1 OS=Homo sapiens OX=9606 GN=CCNYL1 PE=1 SV=2	CCNYL1	2.64972	0.0139752	Up	14	5	28	3	5	40.7	1.02204e+07	7.79507e+06	5.21985e+06	8.26495e+06	7.85692e+06	9449050	0.936794	0.784248	0.418023	1.7925	1.8974	1.97802
P01130	Low-density lipoprotein receptor OS=Homo sapiens OX=9606 GN=LDLR PE=1 SV=1	LDLR	2.6495	7.61299e-07	Up	16	11	102	10	11	95.3	1.07485e+07	1.01444e+07	1.28903e+07	1.24209e+07	1.0864e+07	1.30511e+07	0.635175	0.658002	0.665538	1.73676	1.69146	1.76139
Q969N2	GPI transamidase component PIG-T OS=Homo sapiens OX=9606 GN=PIGT PE=1 SV=1	PIGT	2.64438	9.71201e-06	Up	22	11	79	11	11	65.7	1.12758e+07	9.65365e+06	1.28352e+07	1.18937e+07	1.08235e+07	1.35008e+07	0.799852	0.751639	0.795481	1.99628	2.02281	2.18719
Q13247	Serine/arginine-rich splicing factor 6 OS=Homo sapiens OX=9606 GN=SRSF6 PE=1 SV=2	SRSF6	2.64301	4.72538e-05	Up	20	8	86	5	8	39.6	1.42007e+08	1.48819e+08	1.65191e+08	1.59113e+08	1.51479e+08	1.80808e+08	0.78211	0.899644	0.794892	2.07351	2.19805	2.27426
P31949	Protein S100-A11 OS=Homo sapiens OX=9606 GN=S100A11 PE=1 SV=2	S100A11	2.63821	0.000418501	Up	87	9	128	9	9	11.7	5.83984e+07	6.05815e+07	6.6887e+07	6.37831e+07	7.1036e+07	6.37505e+07	0.641214	0.730126	0.641666	1.6571	2.05498	1.59864
P01116	GTPase KRas OS=Homo sapiens OX=9606 GN=KRAS PE=1 SV=1	KRAS	2.6349	0.00109646	Up	56	7	97	2	2	21.6	5.40165e+06	5.73062e+06	5.43314e+06	6.17774e+06	6.20617e+06	5.40568e+06	0.746335	0.86909	0.655878	2.01966	2.25922	1.70578
O95819	Mitogen-activated protein kinase kinase kinase kinase 4 OS=Homo sapiens OX=9606 GN=MAP4K4 PE=1 SV=2	MAP4K4	2.62451	0.0140821	Up	20	18	118	13	18	142	2.28184e+07	1.91689e+07	2.64262e+07	2.81388e+07	1.37589e+07	3.19085e+07	0.83623	0.771069	0.846137	2.43998	1.32847	2.67062
O43491	Band 4.1-like protein 2 OS=Homo sapiens OX=9606 GN=EPB41L2 PE=1 SV=1	EPB41L2	2.61962	2.41451e-07	Up	28	26	235	25	26	112.5	4.23058e+07	3.91647e+07	4.83742e+07	4.61818e+07	4.20789e+07	4.99246e+07	0.719546	0.731156	0.718849	1.85853	1.88561	1.93927
Q8WWI5	Choline transporter-like protein 1 OS=Homo sapiens OX=9606 GN=SLC44A1 PE=1 SV=1	SLC44A1	2.61573	0.0135225	Up	8	4	47	4	4	73.3	4.92214e+06	4.38825e+06	2.77225e+06	4331327	3.72363e+06	5.14514e+06	0.849177	0.830981	0.417869	1.7681	1.69254	2.02724
Q9GZU8	PSME3-interacting protein OS=Homo sapiens OX=9606 GN=PSME3IP1 PE=1 SV=1	PSME3IP1	2.61075	0.00656528	Up	13	3	9	2	2	28.9	2.28566e+06	2.2059e+06	2.75626e+06	1.78958e+06	2561592	3.32435e+06	0.590947	0.626006	0.622619	1.09479	1.74492	1.96295
P55084	Trifunctional enzyme subunit beta, mitochondrial OS=Homo sapiens OX=9606 GN=HADHB PE=1 SV=3	HADHB	2.59776	4.05981e-07	Up	62	24	384	24	24	51.3	2.18568e+08	1.97956e+08	2.42309e+08	2.31853e+08	2.16924e+08	2.46109e+08	0.770743	0.766208	0.746549	1.93454	2.01538	1.98206
P27635	60S ribosomal protein L10 OS=Homo sapiens OX=9606 GN=RPL10 PE=1 SV=4	RPL10	2.59592	5.84348e-05	Up	43	8	247	8	8	24.6	2.3992e+08	2.11793e+08	2.58653e+08	2.51497e+08	251149729	2.43516e+08	0.786628	0.762202	0.740944	1.95109	2.16952	1.82346
P14209	CD99 antigen OS=Homo sapiens OX=9606 GN=CD99 PE=1 SV=1	CD99	2.58952	0.000379313	Up	16	4	35	4	4	18.8	25648001	2.18537e+07	23752116	2.60533e+07	2.51996e+07	2.37456e+07	0.901505	0.843132	0.729427	2.1668	2.33365	1.90617
Q6NW29	RWD domain-containing protein 4 OS=Homo sapiens OX=9606 GN=RWDD4 PE=1 SV=3	RWDD4	2.58609	0.000393716	Up	10	2	9	2	2	21.2	3.0439e+06	3.34042e+06	3620367	4.03895e+06	2.89608e+06	3.65481e+06	0.73927	0.89049	0.768229	2.32104	1.85315	2.02723
Q9Y3U8	60S ribosomal protein L36 OS=Homo sapiens OX=9606 GN=RPL36 PE=1 SV=3	RPL36	2.58475	6.14064e-05	Up	34	6	246	6	6	12.2	1.50849e+08	1.5544e+08	1.93727e+08	186271769	1.49029e+08	1.90476e+08	0.725187	0.820211	0.813695	2.11882	1.88758	2.09127
Q92552	28S ribosomal protein S27, mitochondrial OS=Homo sapiens OX=9606 GN=MRPS27 PE=1 SV=3	MRPS27	2.5842	0.00012328	Up	27	10	98	10	10	47.6	1.92606e+07	1.98584e+07	2.28322e+07	2.12218e+07	2.20885e+07	2.15615e+07	0.801917	0.907527	0.83056	2.09065	2.42299	2.05023
O00194	Ras-related protein Rab-27B OS=Homo sapiens OX=9606 GN=RAB27B PE=1 SV=4	RAB27B	2.58296	0.000641609	Up	24	5	71	3	3	24.6	3.50129e+06	3.20195e+06	2.98463e+06	3524382	3.09594e+06	3.66102e+06	0.715044	0.717754	0.53255	1.70306	1.66581	1.70755
P04156	Major prion protein OS=Homo sapiens OX=9606 GN=PRNP PE=1 SV=1	PRNP	2.5812	3.60299e-05	Up	15	4	43	4	4	27.6	6.68558e+06	6.74342e+06	7.3216e+06	7.28543e+06	6.58001e+06	8.01259e+06	0.70112	0.776228	0.670848	1.80779	1.81806	1.91907
Q99747	Gamma-soluble NSF attachment protein OS=Homo sapiens OX=9606 GN=NAPG PE=1 SV=1	NAPG	2.58044	0.000139404	Up	34	10	89	10	10	34.7	2.43533e+07	2.33922e+07	2.51567e+07	2.71539e+07	2.48263e+07	2.4588e+07	0.821923	0.866564	0.741809	2.16844	2.20757	1.89523
Q9BVG9	Phosphatidylserine synthase 2 OS=Homo sapiens OX=9606 GN=PTDSS2 PE=1 SV=1	PTDSS2	2.57749	0.0242016	Up	12	4	12	4	4	56.2	495781	1.05308e+06	614865	913537	734710	676290	0.553742	1.29103	0.600015	2.41426	2.16203	1.7251
P53801	Pituitary tumor-transforming gene 1 protein-interacting protein OS=Homo sapiens OX=9606 GN=PTTG1IP PE=1 SV=1	PTTG1IP	2.573	0.0006475	Up	8	2	17	2	2	20.3	2.28307e+06	1.98954e+06	2.0221e+06	2.3068e+06	2.20602e+06	2.08797e+06	0.825426	0.789528	0.638744	1.97338	2.10134	1.72404
P61224	Ras-related protein Rap-1b OS=Homo sapiens OX=9606 GN=RAP1B PE=1 SV=1	RAP1B	2.56771	6.8173e-07	Up	77	12	249	5	12	20.8	1.601e+08	1.50629e+08	1.82465e+08	1.71219e+08	1.60768e+08	1.82267e+08	0.644084	0.665144	0.641349	1.62983	1.70403	1.67465
P35625	Metalloproteinase inhibitor 3 OS=Homo sapiens OX=9606 GN=TIMP3 PE=1 SV=2	TIMP3	2.56757	0.00113014	Up	40	7	89	7	7	24.1	8.36819e+06	9.09337e+06	1.02842e+07	9.71523e+06	7.42428e+06	1.21005e+07	0.626385	0.74712	0.672581	1.72069	1.46417	2.06861
P62277	40S ribosomal protein S13 OS=Homo sapiens OX=9606 GN=RPS13 PE=1 SV=2	RPS13	2.56689	0.000313061	Up	44	7	161	7	7	17.2	1.6024e+08	153106801	1.97735e+08	1.83085e+08	1.4037e+08	2.11541e+08	0.779206	0.817208	0.840098	2.10657	1.79839	2.34932
O95865	N(G),N(G)-dimethylarginine dimethylaminohydrolase 2 OS=Homo sapiens OX=9606 GN=DDAH2 PE=1 SV=1	DDAH2	2.55805	5.70312e-06	Up	23	6	71	5	6	29.6	7.83352e+06	7.82706e+06	9.07563e+06	8.86024e+06	7.86767e+06	9.0225e+06	0.671536	0.73649	0.679758	1.79721	1.77699	1.76646
P23458	Tyrosine-protein kinase JAK1 OS=Homo sapiens OX=9606 GN=JAK1 PE=1 SV=2	JAK1	2.55788	0.00201834	Up	13	11	64	11	11	133.2	9.43461e+06	8.81571e+06	7.36835e+06	9.54136e+06	7.96492e+06	9.54068e+06	0.734646	0.753471	0.50129	1.75794	1.63404	1.69667
Q969G5	Caveolae-associated protein 3 OS=Homo sapiens OX=9606 GN=CAVIN3 PE=1 SV=3	CAVIN3	2.55772	6.42983e-06	Up	55	11	199	11	11	27.7	7.73984e+07	7.12953e+07	9.32622e+07	8.12382e+07	7.95897e+07	8.95938e+07	0.807428	0.816373	0.850045	2.00527	2.18754	2.13459
Q9BQG0	Myb-binding protein 1A OS=Homo sapiens OX=9606 GN=MYBBP1A PE=1 SV=2	MYBBP1A	2.54912	7.45863e-05	Up	27	29	175	29	29	148.8	9.19843e+07	9.77394e+07	1.17957e+08	1.08935e+08	9.20014e+07	1.18448e+08	0.822915	0.959768	0.921997	2.30594	2.16852	2.4201
Q9Y6D6	Brefeldin A-inhibited guanine nucleotide-exchange protein 1 OS=Homo sapiens OX=9606 GN=ARFGEF1 PE=1 SV=2	ARFGEF1	2.54831	0.00296725	Up	10	15	71	9	15	208.6	2.21914e+07	1.99498e+07	2.70397e+07	1.86207e+07	2.16113e+07	3.13319e+07	0.822491	0.811595	0.875613	1.63299	2.11035	2.65214
P05455	Lupus La protein OS=Homo sapiens OX=9606 GN=SSB PE=1 SV=2	SSB	2.54167	0.0211729	Up	48	27	255	27	27	46.8	2.2016e+08	1.95032e+08	2.42652e+08	1.61487e+08	3.1271e+08	1.9114e+08	0.861968	0.838136	0.830044	1.496	3.22568	1.70911
Q9ULH0	Kinase D-interacting substrate of 220 kDa OS=Homo sapiens OX=9606 GN=KIDINS220 PE=1 SV=3	KIDINS220	2.53393	0.00109565	Up	7	9	67	9	9	196.4	5.17768e+06	4.00683e+06	4.22198e+06	4.53169e+06	4.71153e+06	4.58669e+06	0.868867	0.738032	0.619012	1.79936	2.08309	1.75785
Q9BQS8	FYVE and coiled-coil domain-containing protein 1 OS=Homo sapiens OX=9606 GN=FYCO1 PE=1 SV=3	FYCO1	2.52622	0.00245383	Up	3	2	6	2	2	166.9	406127	307331	493351	329072	411676	483308	0.812858	0.675171	0.862726	1.55842	2.17088	2.20923
Q9BZG1	Ras-related protein Rab-34 OS=Homo sapiens OX=9606 GN=RAB34 PE=1 SV=1	RAB34	2.5253	0.00268198	Up	45	12	83	12	12	29	1.81312e+07	1.38915e+07	2.41488e+07	2.09104e+07	1.9409e+07	1.61831e+07	0.749891	0.630634	0.872634	2.04633	2.11496	1.52862
P35606	Coatomer subunit beta' OS=Homo sapiens OX=9606 GN=COPB2 PE=1 SV=2	COPB2	2.51245	9.29653e-06	Up	63	43	655	43	43	102.4	3.54217e+08	3.41122e+08	3.96668e+08	3.64348e+08	3.4405e+08	4.08462e+08	0.736494	0.778511	0.720597	1.79249	1.88473	1.93962
P62899	60S ribosomal protein L31 OS=Homo sapiens OX=9606 GN=RPL31 PE=1 SV=1	RPL31	2.49107	0.0101837	Up	46	6	138	6	6	14.5	8.15886e+07	6.97125e+07	1.68814e+08	1.09067e+08	9.3851e+07	1.12065e+08	0.566481	0.531278	1.02407	1.7918	1.71681	1.77701
P23919	Thymidylate kinase OS=Homo sapiens OX=9606 GN=DTYMK PE=1 SV=4	DTYMK	2.49097	0.000560698	Up	36	8	99	8	8	23.8	3.25059e+07	2.92766e+07	3.38305e+07	3.07191e+07	3.49085e+07	3.06447e+07	0.869206	0.859285	0.790378	1.94361	2.45934	1.87146
O43493	Trans-Golgi network integral membrane protein 2 OS=Homo sapiens OX=9606 GN=TGOLN2 PE=1 SV=4	TGOLN2	2.48099	0.00694754	Up	16	6	45	6	6	45.9	1.61208e+07	1.1055e+07	1.12138e+07	1.07813e+07	1.39971e+07	1.40203e+07	0.901734	0.678742	0.548036	1.42693	2.06281	1.79108
Q8NB49	Phospholipid-transporting ATPase IG OS=Homo sapiens OX=9606 GN=ATP11C PE=1 SV=3	ATP11C	2.48	0.000404424	Up	12	13	67	12	13	129.4	6.79171e+06	6.28448e+06	6.58266e+06	7.12697e+06	6.50369e+06	6.2243e+06	0.714909	0.7261	0.605393	1.77508	1.80368	1.49633
P23142	Fibulin-1 OS=Homo sapiens OX=9606 GN=FBLN1 PE=1 SV=4	FBLN1	2.47567	0.000231426	Up	16	6	27	2	2	77.2	56291160	49322212	61068596	59315548	44525848	64723040	0.743263	0.714826	0.704507	1.85315	1.54897	1.95176
P62906	60S ribosomal protein L10a OS=Homo sapiens OX=9606 GN=RPL10A PE=1 SV=2	RPL10A	2.47111	7.36219e-06	Up	51	13	288	13	13	24.8	2.04853e+08	1.75235e+08	2.33726e+08	2.0367e+08	1.84802e+08	2.26519e+08	0.880208	0.826455	0.877434	2.07066	2.09208	2.22286
Q9UKX7	Nuclear pore complex protein Nup50 OS=Homo sapiens OX=9606 GN=NUP50 PE=1 SV=2	NUP50	2.47044	0.00158895	Up	26	8	39	8	8	50.1	7.01118e+06	7.52189e+06	8.63299e+06	9.72146e+06	6.39088e+06	7.22938e+06	0.841356	0.990766	0.905138	2.76033	2.02058	1.98132
Q9HA65	TBC1 domain family member 17 OS=Homo sapiens OX=9606 GN=TBC1D17 PE=1 SV=2	TBC1D17	2.46649	0.00251466	Up	3	2	2	2	2	72.7	1.65632e+06	1.82132e+06	2.92314e+06	2318180	1.74824e+06	2.28748e+06	0.609148	0.735225	0.939274	2.01728	1.69398	1.92132
Q53TN4	Plasma membrane ascorbate-dependent reductase CYBRD1 OS=Homo sapiens OX=9606 GN=CYBRD1 PE=1 SV=1	CYBRD1	2.46136	0.000133214	Up	8	2	27	2	2	31.6	1.10336e+07	1.07475e+07	1.21907e+07	1.20314e+07	1.1138e+07	1.077e+07	0.594484	0.6356	0.573871	1.53383	1.58109	1.32526
Q9UBQ0	Vacuolar protein sorting-associated protein 29 OS=Homo sapiens OX=9606 GN=VPS29 PE=1 SV=1	VPS29	2.46051	0.000133766	Up	54	8	122	8	8	20.5	5.13732e+07	4.29206e+07	5.90105e+07	4.91884e+07	5.19553e+07	5.07511e+07	0.805841	0.738983	0.808735	1.82564	2.14719	1.81812
Q14914	Prostaglandin reductase 1 OS=Homo sapiens OX=9606 GN=PTGR1 PE=1 SV=2	PTGR1	2.45429	7.85999e-05	Up	38	12	109	12	12	35.8	2.52083e+07	2.175e+07	2.52014e+07	2.3233e+07	2.16816e+07	2.73244e+07	0.780741	0.739401	0.681953	1.70259	1.76922	1.93277
P46778	60S ribosomal protein L21 OS=Homo sapiens OX=9606 GN=RPL21 PE=1 SV=2	RPL21	2.45137	0.000185757	Up	34	6	117	6	6	18.6	6.58571e+07	5.82764e+07	6.16633e+07	6.0828e+07	5.96979e+07	6.52855e+07	0.838058	0.813992	0.685588	1.83154	2.00151	1.89738
P50991	T-complex protein 1 subunit delta OS=Homo sapiens OX=9606 GN=CCT4 PE=1 SV=4	CCT4	2.45047	0.000114246	Up	49	24	438	23	23	57.9	2.49564e+08	2.26957e+08	2.59777e+08	2.42981e+08	2.47547e+08	2.41278e+08	0.82627	0.82478	0.751458	1.9035	2.15936	1.82441
Q96A33	PAT complex subunit CCDC47 OS=Homo sapiens OX=9606 GN=CCDC47 PE=1 SV=1	CCDC47	2.4498	7.11042e-05	Up	27	15	153	15	15	55.8	3.82594e+07	38408788	4.33421e+07	3.90221e+07	3.96704e+07	4.06892e+07	0.822948	0.906819	0.814534	1.98603	2.24816	1.99884
Q86V21	Acetoacetyl-CoA synthetase OS=Homo sapiens OX=9606 GN=AACS PE=1 SV=1	AACS	2.43858	0.000144526	Up	19	13	70	13	13	75.1	1.42749e+07	1.28572e+07	1.90352e+07	1.60698e+07	1.42795e+07	1.49468e+07	0.854277	0.844556	0.995284	2.27549	2.25147	2.04286
O14763	Tumor necrosis factor receptor superfamily member 10B OS=Homo sapiens OX=9606 GN=TNFRSF10B PE=1 SV=2	TNFRSF10B	2.43814	4.1185e-05	Up	22	6	52	6	6	47.8	4.44806e+06	3.62622e+06	5.23869e+06	4.50871e+06	4.10614e+06	4.47596e+06	0.824661	0.737928	0.848578	1.97787	2.0057	1.8952
Q9Y2A7	Nck-associated protein 1 OS=Homo sapiens OX=9606 GN=NCKAP1 PE=1 SV=1	NCKAP1	2.43619	0.000368316	Up	37	33	253	33	33	128.7	6.40631e+07	6.67344e+07	6.36413e+07	6.51447e+07	5.90686e+07	7.01508e+07	0.787363	0.90027	0.683394	1.89447	1.91272	1.96909
Q4ZIN3	Membralin OS=Homo sapiens OX=9606 GN=TMEM259 PE=1 SV=1	TMEM259	2.43376	0.00041761	Up	3	2	8	2	2	67.8	483007	503722	564516	472744	450854	619616	0.686272	0.785579	0.700784	1.58932	1.68774	2.01062
P02786	Transferrin receptor protein 1 OS=Homo sapiens OX=9606 GN=TFRC PE=1 SV=2	TFRC	2.43296	4.12315e-06	Up	45	30	567	30	30	84.8	1.60046e+08	1.56116e+08	1.97713e+08	1.72866e+08	1.57419e+08	1.76367e+08	0.769473	0.823861	0.830519	1.96652	1.99404	1.93656
P46821	Microtubule-associated protein 1B OS=Homo sapiens OX=9606 GN=MAP1B PE=1 SV=2	MAP1B	2.42986	2.17855e-05	Up	45	76	905	74	76	270.5	5.55293e+08	5.4249e+08	6.04413e+08	5.55879e+08	5.19489e+08	6.10961e+08	0.835299	0.895709	0.794362	1.97852	2.05884	2.09893
O75390	Citrate synthase, mitochondrial OS=Homo sapiens OX=9606 GN=CS PE=1 SV=2	CS	2.41903	3.56045e-05	Up	41	13	220	13	13	51.7	148056136	1.50683e+08	172423213	1.56537e+08	1.49362e+08	1.57083e+08	0.813628	0.908905	0.827866	2.03543	2.16256	1.97149
Q9NPA0	ER membrane protein complex subunit 7 OS=Homo sapiens OX=9606 GN=EMC7 PE=1 SV=1	EMC7	2.41082	3.00047e-05	Up	31	5	88	5	5	26.5	1.47045e+07	14069019	1.7282e+07	14240322	1.46072e+07	1.61575e+07	0.727528	0.764048	0.747069	1.6671	1.90412	1.82575
Q9Y3A5	Ribosome maturation protein SBDS OS=Homo sapiens OX=9606 GN=SBDS PE=1 SV=4	SBDS	2.40929	0.00104719	Up	52	15	125	15	15	28.7	1.79416e+08	1.43735e+08	2.18102e+08	2.01659e+08	1.35307e+08	1.9171e+08	0.887759	0.78064	0.942882	2.36098	1.76393	2.16642
Q96JB6	Lysyl oxidase homolog 4 OS=Homo sapiens OX=9606 GN=LOXL4 PE=1 SV=1	LOXL4	2.39731	8.5604e-05	Up	3	2	6	2	2	84.4	1.04255e+06	952544	1.1043e+06	1.13021e+06	885924	1.01165e+06	0.826971	0.829345	0.765327	2.12126	1.85148	1.8327
P56192	Methionine--tRNA ligase, cytoplasmic OS=Homo sapiens OX=9606 GN=MARS1 PE=1 SV=2	MARS1	2.39624	0.000152564	Up	30	19	222	19	19	101.1	6.37167e+07	5.94136e+07	7.71006e+07	5.98786e+07	6.61779e+07	6.75744e+07	0.78221	0.800593	0.826976	1.73933	2.14048	1.8946
O15533	Tapasin OS=Homo sapiens OX=9606 GN=TAPBP PE=1 SV=1	TAPBP	2.38708	0.00176003	Up	25	7	94	7	7	47.6	3.18301e+07	3.14207e+07	3.9274e+07	2.66864e+07	3.33386e+07	3.90732e+07	0.654428	0.709082	0.705496	1.29824	1.80592	1.83471
O00622	CCN family member 1 OS=Homo sapiens OX=9606 GN=CCN1 PE=1 SV=1	CCN1	2.38635	0.000376418	Up	27	8	75	8	8	42	1.33313e+07	13274539	1.57568e+07	1.20364e+07	1.32947e+07	1.57317e+07	0.821039	0.897361	0.84786	1.754	2.15724	2.21275
O75844	CAAX prenyl protease 1 homolog OS=Homo sapiens OX=9606 GN=ZMPSTE24 PE=1 SV=2	ZMPSTE24	2.3861	6.06364e-05	Up	34	14	197	14	14	54.8	3.0674e+07	3.13831e+07	3.9276e+07	3.37322e+07	3.14818e+07	3.26233e+07	0.713306	0.801046	0.797992	1.85606	1.92883	1.7326
Q15642	Cdc42-interacting protein 4 OS=Homo sapiens OX=9606 GN=TRIP10 PE=1 SV=3	TRIP10	2.38552	0.000838528	Up	33	16	144	16	16	68.3	2.20188e+07	1.91648e+07	3.11344e+07	2.27624e+07	1.9605e+07	2.71856e+07	0.67729	0.647051	0.836731	1.65668	1.58882	1.90978
Q8N3E9	1-phosphatidylinositol 4,5-bisphosphate phosphodiesterase delta-3 OS=Homo sapiens OX=9606 GN=PLCD3 PE=1 SV=3	PLCD3	2.37197	0.00803951	Up	10	6	28	6	6	89.2	4.60508e+06	3.46149e+06	2.91707e+06	4.0375e+06	3.06389e+06	3.65829e+06	1.01047	0.833694	0.559243	2.09624	1.77129	1.83329
Q96J84	Kin of IRRE-like protein 1 OS=Homo sapiens OX=9606 GN=KIRREL1 PE=1 SV=2	KIRREL1	2.369	0.0154919	Up	9	5	28	5	5	83.5	4.4935e+06	4.92552e+06	5.24097e+06	4.08962e+06	3.22636e+06	7.05986e+06	0.692165	0.832784	0.705344	1.49056	1.30938	2.48362
P02751	Fibronectin OS=Homo sapiens OX=9606 GN=FN1 PE=1 SV=5	FN1	2.36279	4.63625e-06	Up	52	91	2510	91	91	272.2	2.22763e+09	2.11141e+09	2.51359e+09	2.15724e+09	2.04173e+09	2.384e+09	0.794443	0.826512	0.783213	1.82037	1.91843	1.94174
Q92743	Serine protease HTRA1 OS=Homo sapiens OX=9606 GN=HTRA1 PE=1 SV=1	HTRA1	2.35825	7.39558e-05	Up	29	11	94	11	11	51.3	3.19256e+07	3.06143e+07	3.46821e+07	3.06467e+07	2.72498e+07	3.5766e+07	0.590832	0.621877	0.560783	1.34199	1.32867	1.51168
Q9C0D5	Protein TANC1 OS=Homo sapiens OX=9606 GN=TANC1 PE=1 SV=3	TANC1	2.35656	0.00165478	Up	2	3	17	3	3	202.1	791754	842913	1.05475e+06	886069	915912	747904	0.682575	0.797625	0.794466	1.80746	2.08037	1.47255
Q8NAV1	Pre-mRNA-splicing factor 38A OS=Homo sapiens OX=9606 GN=PRPF38A PE=1 SV=1	PRPF38A	2.3557	0.017144	Up	16	4	23	4	4	37.5	6.21031e+06	2.78856e+06	4.20847e+06	4.79882e+06	3.2511e+06	4.63324e+06	1.2148	0.598728	0.719254	2.2211	1.67552	2.06987
Q709C8	Vacuolar protein sorting-associated protein 13C OS=Homo sapiens OX=9606 GN=VPS13C PE=1 SV=1	VPS13C	2.35343	3.88355e-05	Up	6	15	41	15	15	422.1	4.3561e+06	4.30272e+06	5.30332e+06	4.45725e+06	3.87617e+06	5.04077e+06	0.722564	0.783389	0.768583	1.74939	1.69398	1.90959
Q9NZU5	LIM and cysteine-rich domains protein 1 OS=Homo sapiens OX=9606 GN=LMCD1 PE=1 SV=1	LMCD1	2.34926	0.000211409	Up	58	21	200	21	21	40.8	1.14547e+08	1.02651e+08	133387718	9.94297e+07	1.07767e+08	1.26273e+08	0.771081	0.758461	0.784507	1.5837	1.9113	1.9413
P63010	AP-2 complex subunit beta OS=Homo sapiens OX=9606 GN=AP2B1 PE=1 SV=1	AP2B1	2.34512	1.69319e-05	Up	45	42	625	23	43	104.5	2.55448e+08	2.59721e+08	3.08406e+08	2.7562e+08	2.35893e+08	2.74032e+08	0.740837	0.826764	0.78146	1.89134	1.80244	1.81503
P84095	Rho-related GTP-binding protein RhoG OS=Homo sapiens OX=9606 GN=RHOG PE=1 SV=1	RHOG	2.34101	0.000194965	Up	41	6	66	5	5	21.3	1.18494e+07	1.22691e+07	1.30668e+07	1.24121e+07	1.00162e+07	13238087	0.772896	0.878406	0.744662	1.91563	1.7213	1.97204
Q9UJ83	2-hydroxyacyl-CoA lyase 1 OS=Homo sapiens OX=9606 GN=HACL1 PE=1 SV=2	HACL1	2.33493	0.0118556	Up	19	7	54	7	7	63.7	3.4393e+06	2.2043e+06	4.18352e+06	3.06709e+06	3.52852e+06	2.4786e+06	0.87952	0.618731	0.934721	1.85585	2.37736	1.4476
P62266	40S ribosomal protein S23 OS=Homo sapiens OX=9606 GN=RPS23 PE=1 SV=3	RPS23	2.33301	0.000291284	Up	50	8	184	8	8	15.8	8.05327e+07	6.1566e+07	8.60399e+07	7.43001e+07	7.11095e+07	69079216	0.887914	0.745067	0.828826	1.93834	2.06563	1.73945
O14910	Protein lin-7 homolog A OS=Homo sapiens OX=9606 GN=LIN7A PE=1 SV=2	LIN7A	2.32655	0.000253518	Up	36	8	66	5	8	26	1.62805e+07	1.69911e+07	1.68309e+07	1.60455e+07	1.46568e+07	1.7032e+07	0.711215	0.814727	0.642401	1.65855	1.68694	1.69927
Q13443	Disintegrin and metalloproteinase domain-containing protein 9 OS=Homo sapiens OX=9606 GN=ADAM9 PE=1 SV=1	ADAM9	2.32547	2.7091e-05	Up	23	15	102	15	15	90.5	1.6998e+07	1.52357e+07	1.89875e+07	16282895	15868512	1.60518e+07	0.834561	0.821071	0.814504	1.89162	2.0527	1.7999
P04040	Catalase OS=Homo sapiens OX=9606 GN=CAT PE=1 SV=3	CAT	2.32517	9.53775e-06	Up	61	27	413	27	27	59.7	1.39062e+08	1.18484e+08	1.64621e+08	1.33892e+08	1.22352e+08	1.40552e+08	0.85137	0.796206	0.880567	1.93958	1.97355	1.96523
Q07954	Prolow-density lipoprotein receptor-related protein 1 OS=Homo sapiens OX=9606 GN=LRP1 PE=1 SV=2	LRP1	2.32494	4.63418e-06	Up	35	127	2276	125	127	504.3	6.28029e+08	6.11075e+08	7.2704e+08	6.26021e+08	5.58827e+08	6.75537e+08	0.698765	0.746279	0.706764	1.64809	1.63816	1.71659
O95163	Elongator complex protein 1 OS=Homo sapiens OX=9606 GN=ELP1 PE=1 SV=3	ELP1	2.32257	0.00419091	Up	10	9	37	9	9	150.2	5.10846e+06	4.76815e+06	5.9304e+06	6.04253e+06	3.40892e+06	5.59392e+06	0.869756	0.891073	0.882178	2.43426	1.52916	2.17514
Q9UL01	Dermatan-sulfate epimerase OS=Homo sapiens OX=9606 GN=DSE PE=1 SV=1	DSE	2.31865	0.00341432	Up	9	5	26	5	5	109.7	1.36038e+06	1.45592e+06	1.36198e+06	1.25935e+06	1.04468e+06	1.70175e+06	0.773904	0.90912	0.676958	1.69517	1.5658	2.21099
Q14254	Flotillin-2 OS=Homo sapiens OX=9606 GN=FLOT2 PE=1 SV=2	FLOT2	2.3182	0.000371544	Up	50	19	152	19	19	47	3.01722e+07	2.48092e+07	4.03524e+07	3.03152e+07	26576670	3.19868e+07	0.762084	0.687803	0.890493	1.81175	1.76858	1.84515
Q86VY9	Transmembrane protein 200A OS=Homo sapiens OX=9606 GN=TMEM200A PE=1 SV=1	TMEM200A	2.31769	0.00292767	Up	10	3	5	3	3	54.3	466837	410360	365022	364427	385524	432198	0.930479	0.897764	0.635662	1.71867	2.02451	1.96738
P61353	60S ribosomal protein L27 OS=Homo sapiens OX=9606 GN=RPL27 PE=1 SV=2	RPL27	2.31539	0.00010218	Up	49	6	306	6	6	15.8	2.16292e+08	2.37069e+08	2.7374e+08	2.28597e+08	2.12604e+08	2.43464e+08	0.710432	0.854694	0.78557	1.77661	1.83984	1.82633
Q9BZ23	Pantothenate kinase 2, mitochondrial OS=Homo sapiens OX=9606 GN=PANK2 PE=1 SV=3	PANK2	2.31467	0.000407071	Up	5	2	8	2	2	62.6	3.22516e+06	3.07255e+06	3.06095e+06	3.1745e+06	2.56103e+06	3.15388e+06	0.837924	0.876209	0.694822	1.9515	1.75305	1.87139
Q15262	Receptor-type tyrosine-protein phosphatase kappa OS=Homo sapiens OX=9606 GN=PTPRK PE=1 SV=2	PTPRK	2.31214	0.00310881	Up	10	9	28	9	9	162	1.74319e+06	2.13128e+06	1.94831e+06	2.21128e+06	1.54231e+06	1.78627e+06	0.611458	0.820572	0.597094	1.83529	1.42535	1.43098
Q9Y3Q3	Transmembrane emp24 domain-containing protein 3 OS=Homo sapiens OX=9606 GN=TMED3 PE=1 SV=1	TMED3	2.3057	0.000134473	Up	53	7	97	7	7	24.8	2.03706e+07	1.64278e+07	2.42249e+07	2.02324e+07	1.76443e+07	1.88217e+07	0.730049	0.646225	0.758534	1.71568	1.66602	1.54054
P62834	Ras-related protein Rap-1A OS=Homo sapiens OX=9606 GN=RAP1A PE=1 SV=1	RAP1A	2.30382	0.00191641	Up	77	12	204	5	5	21	9.15905e+06	8.24636e+06	8690821	1.00344e+07	6.57134e+06	8052613	0.68641	0.678346	0.569061	1.77937	1.29752	1.37827
P15880	40S ribosomal protein S2 OS=Homo sapiens OX=9606 GN=RPS2 PE=1 SV=2	RPS2	2.30332	2.62382e-06	Up	47	12	429	12	12	31.3	3.48333e+08	3.06894e+08	3.92461e+08	3.24157e+08	2.9704e+08	3.58345e+08	0.830998	0.803617	0.818026	1.82979	1.86702	1.95241
Q16629	Serine/arginine-rich splicing factor 7 OS=Homo sapiens OX=9606 GN=SRSF7 PE=1 SV=1	SRSF7	2.303	0.000562104	Up	32	7	53	6	7	27.4	66367368	7.68384e+07	8.53185e+07	6.64058e+07	6.80215e+07	7.98711e+07	0.689898	0.876727	0.774888	1.63334	1.86296	1.8962
Q8TDQ7	Glucosamine-6-phosphate isomerase 2 OS=Homo sapiens OX=9606 GN=GNPDA2 PE=1 SV=1	GNPDA2	2.29918	0.0041052	Up	68	12	88	8	8	31.1	6.49184e+06	5.65303e+06	11076310	7.3675e+06	6.14028e+06	7.80796e+06	0.621318	0.593859	0.926202	1.66842	1.54832	1.70666
Q6ICB4	Sesquipedalian-2 OS=Homo sapiens OX=9606 GN=PHETA2 PE=1 SV=1	PHETA2	2.29073	0.0184581	Up	13	2	7	2	2	28.3	1.4294e+06	1.74813e+06	1.26087e+06	1.71077e+06	948370	1.59678e+06	0.912239	1.22457	0.703056	2.58337	1.59463	2.32736
P51688	N-sulphoglucosamine sulphohydrolase OS=Homo sapiens OX=9606 GN=SGSH PE=1 SV=1	SGSH	2.28384	0.000580151	Up	28	9	84	9	9	56.7	2.47946e+07	1.97958e+07	2.87924e+07	2.509e+07	1.80091e+07	2.49093e+07	0.813303	0.712731	0.825161	1.94732	1.55638	1.86605
Q99650	Oncostatin-M-specific receptor subunit beta OS=Homo sapiens OX=9606 GN=OSMR PE=1 SV=1	OSMR	2.28359	0.00114548	Up	4	3	20	3	3	110.4	498564	464496	616580	495713	374410	601449	0.540897	0.553135	0.58445	1.27252	1.07021	1.49024
Q9BRK3	Matrix remodeling-associated protein 8 OS=Homo sapiens OX=9606 GN=MXRA8 PE=1 SV=1	MXRA8	2.28061	0.00179961	Up	34	11	25	11	11	49.1	2.91184e+07	2.77209e+07	2.51469e+07	2.55492e+07	2.18812e+07	2.96889e+07	0.858949	0.897561	0.648112	1.78328	1.70059	2.00014
Q9H173	Nucleotide exchange factor SIL1 OS=Homo sapiens OX=9606 GN=SIL1 PE=1 SV=1	SIL1	2.27945	1.07397e-05	Up	31	12	80	12	12	52.1	1.65608e+07	1.42762e+07	1.87402e+07	16375611	1.35309e+07	1.59357e+07	0.763621	0.722547	0.754981	1.78663	1.6438	1.67816
Q53GQ0	Very-long-chain 3-oxoacyl-CoA reductase OS=Homo sapiens OX=9606 GN=HSD17B12 PE=1 SV=2	HSD17B12	2.2637	0.000245993	Up	38	12	190	12	12	34.3	5.3931e+07	4.56223e+07	5.2471e+07	43497990	4.42929e+07	5.23674e+07	0.823237	0.764398	0.699795	1.57107	1.78135	1.82563
P46783	40S ribosomal protein S10 OS=Homo sapiens OX=9606 GN=RPS10 PE=1 SV=1	RPS10	2.26353	0.00134555	Up	57	10	296	10	10	18.9	1.89628e+08	1.80519e+08	2.32042e+08	1.77106e+08	2.02844e+08	1.67764e+08	0.846137	0.884132	0.904629	1.86988	2.38467	1.70963
Q15019	Septin-2 OS=Homo sapiens OX=9606 GN=SEPTIN2 PE=1 SV=1	SEPTIN2	2.25959	9.59003e-05	Up	60	15	249	15	15	41.5	1.83218e+08	1.64957e+08	1.93336e+08	1.74708e+08	1.61216e+08	1.6055e+08	0.855455	0.845389	0.788691	1.93012	1.9832	1.712
Q9Y5S1	Transient receptor potential cation channel subfamily V member 2 OS=Homo sapiens OX=9606 GN=TRPV2 PE=1 SV=1	TRPV2	2.25488	0.000217458	Up	22	11	97	11	11	85.9	1.61093e+07	1.612e+07	1.65394e+07	1.54196e+07	1.43332e+07	1.51316e+07	0.897829	0.986139	0.805384	2.03344	2.10469	1.92605
Q9BT78	COP9 signalosome complex subunit 4 OS=Homo sapiens OX=9606 GN=COPS4 PE=1 SV=1	COPS4	2.25454	0.000233521	Up	45	16	180	16	16	46.2	5.85379e+07	5.91061e+07	7.09635e+07	5.82918e+07	58419036	5.52516e+07	0.787312	0.872565	0.833892	1.85506	2.0701	1.69715
P20591	Interferon-induced GTP-binding protein Mx1 OS=Homo sapiens OX=9606 GN=MX1 PE=1 SV=4	MX1	2.25317	1.44351e-05	Up	68	39	1010	34	39	75.5	6.84002e+08	5.82167e+08	7.58417e+08	6.36156e+08	5.87624e+08	6.21998e+08	0.830912	0.776249	0.804954	1.82853	1.88073	1.72565
O15397	Importin-8 OS=Homo sapiens OX=9606 GN=IPO8 PE=1 SV=2	IPO8	2.25186	9.18158e-05	Up	6	5	29	5	5	119.9	3.31297e+06	2.81329e+06	3.60309e+06	3.28062e+06	2.70695e+06	2.89361e+06	0.930285	0.867099	0.883973	2.1797	2.00265	1.85568
Q9H5Q4	Dimethyladenosine transferase 2, mitochondrial OS=Homo sapiens OX=9606 GN=TFB2M PE=1 SV=1	TFB2M	2.25032	0.00367409	Up	6	2	4	2	2	45.3	1387711	1005873	1.39288e+06	1080424	895341	1.50209e+06	0.92155	0.733194	0.808164	1.69768	1.56652	2.27814
P17174	Aspartate aminotransferase, cytoplasmic OS=Homo sapiens OX=9606 GN=GOT1 PE=1 SV=3	GOT1	2.24399	3.4281e-05	Up	52	16	164	16	16	46.2	4.48828e+07	4.42506e+07	5.21834e+07	4.5647e+07	3.70545e+07	4.65815e+07	0.798403	0.864007	0.811035	1.9213	1.73665	1.89243
Q96N67	Dedicator of cytokinesis protein 7 OS=Homo sapiens OX=9606 GN=DOCK7 PE=1 SV=4	DOCK7	2.24397	8.41935e-06	Up	21	36	219	33	37	242.4	3.14017e+07	2.86521e+07	3.48542e+07	28008347	2.69827e+07	3.15293e+07	0.851403	0.852696	0.82566	1.79684	1.9275	1.95237
Q8IVF7	Formin-like protein 3 OS=Homo sapiens OX=9606 GN=FMNL3 PE=1 SV=3	FMNL3	2.24092	0.000296186	Up	7	7	22	3	7	117.1	4.66868e+06	4.04878e+06	5.89751e+06	4.98513e+06	3.87732e+06	4359590	0.804185	0.765494	0.887556	2.03179	1.75963	1.71503
Q86WA8	Lon protease homolog 2, peroxisomal OS=Homo sapiens OX=9606 GN=LONP2 PE=1 SV=1	LONP2	2.24064	0.0008365	Up	2	2	12	2	2	94.6	947751	734145	1.14027e+06	979499	731654	838965	0.916352	0.779123	0.963252	2.24085	1.86381	1.85258
Q99536	Synaptic vesicle membrane protein VAT-1 homolog OS=Homo sapiens OX=9606 GN=VAT1 PE=1 SV=2	VAT1	2.2368	0.0051466	Up	60	16	278	16	16	41.9	1.26062e+08	1.32981e+08	1.71794e+08	1.54283e+08	1.29281e+08	1.04445e+08	0.748297	0.866435	0.890968	2.16695	2.02186	1.41593
Q9UNP9	Peptidyl-prolyl cis-trans isomerase E OS=Homo sapiens OX=9606 GN=PPIE PE=1 SV=1	PPIE	2.23441	0.000507463	Up	18	4	32	3	3	33.4	1.49933e+07	14283889	1.50922e+07	12421327	12376202	15762299	1.00995	1.0561	0.888225	1.97976	2.19644	2.42487
Q15063	Periostin OS=Homo sapiens OX=9606 GN=POSTN PE=1 SV=2	POSTN	2.23305	0.00109957	Up	32	19	168	19	19	93.3	9.24407e+06	1.1645e+07	1.16152e+07	9.96631e+06	9.24464e+06	1.04685e+07	0.34356	0.475045	0.377163	0.876424	0.905225	0.888566
O96000	NADH dehydrogenase [ubiquinone] 1 beta subcomplex subunit 10 OS=Homo sapiens OX=9606 GN=NDUFB10 PE=1 SV=3	NDUFB10	2.22323	7.70731e-06	Up	60	8	125	8	8	20.8	3.39607e+07	2.98077e+07	3.938e+07	33088671	2.77797e+07	32074027	0.801121	0.771804	0.811639	1.8469	1.72654	1.72799
P36404	ADP-ribosylation factor-like protein 2 OS=Homo sapiens OX=9606 GN=ARL2 PE=1 SV=4	ARL2	2.22113	0.00305589	Up	35	4	17	4	4	20.9	4.41643e+06	3.32257e+06	4.76875e+06	3.05534e+06	3.94348e+06	4.17935e+06	0.941672	0.777602	0.888378	1.54144	2.21532	2.03518
P62269	40S ribosomal protein S18 OS=Homo sapiens OX=9606 GN=RPS18 PE=1 SV=3	RPS18	2.2205	5.5011e-07	Up	45	10	385	10	10	17.7	2.99283e+08	2.69717e+08	3.35744e+08	2.75231e+08	2.45847e+08	2.95267e+08	0.862079	0.852764	0.844964	1.87587	1.86577	1.94243
P10114	Ras-related protein Rap-2a OS=Homo sapiens OX=9606 GN=RAP2A PE=1 SV=1	RAP2A	2.21942	0.000523925	Up	38	6	95	2	2	20.6	1.16465e+06	840084	1.18308e+06	945740	947444	959586	0.870541	0.68924	0.772627	1.67265	1.86583	1.6381
Q9H6X2	Anthrax toxin receptor 1 OS=Homo sapiens OX=9606 GN=ANTXR1 PE=1 SV=2	ANTXR1	2.20913	0.00139407	Up	36	17	165	15	17	62.7	7.44333e+07	6.88525e+07	6.52826e+07	65004718	5.33084e+07	7.14278e+07	0.698277	0.708984	0.535085	1.44293	1.3176	1.53036
Q6P9B6	MTOR-associated protein MEAK7 OS=Homo sapiens OX=9606 GN=MEAK7 PE=1 SV=2	MEAK7	2.20703	0.00016338	Up	24	6	79	6	6	51	1.54156e+07	1.16954e+07	1.64294e+07	1.37682e+07	1.18926e+07	1.31904e+07	0.987828	0.822607	0.919828	2.08755	2.00782	1.93039
P82650	28S ribosomal protein S22, mitochondrial OS=Homo sapiens OX=9606 GN=MRPS22 PE=1 SV=1	MRPS22	2.2067	0.000158663	Up	47	14	115	14	14	41.3	2.45766e+07	2.36398e+07	2.536e+07	2.10954e+07	2.09678e+07	2.41819e+07	0.936719	0.988981	0.844505	1.90247	2.10557	2.10496
Q9NYI0	PH and SEC7 domain-containing protein 3 OS=Homo sapiens OX=9606 GN=PSD3 PE=1 SV=2	PSD3	2.20275	3.55488e-05	Up	9	8	62	8	8	116	7.25371e+06	6.74771e+06	8.93692e+06	7.14874e+06	5.86535e+06	7.49791e+06	0.661724	0.675661	0.712311	1.54308	1.40974	1.56215
Q9Y2L1	Exosome complex exonuclease RRP44 OS=Homo sapiens OX=9606 GN=DIS3 PE=1 SV=2	DIS3	2.2003	0.0054136	Up	16	11	57	11	11	108.9	1.78864e+07	1.99021e+07	1.82153e+07	1.69242e+07	1.85681e+07	1.46565e+07	0.831276	1.01526	0.739645	1.86111	2.27361	1.55566
P61513	60S ribosomal protein L37a OS=Homo sapiens OX=9606 GN=RPL37A PE=1 SV=2	RPL37A	2.19859	0.000499621	Up	52	5	136	5	5	10.3	6.98387e+07	7.6912e+07	7.57282e+07	6.65516e+07	6.39507e+07	6.94712e+07	0.765848	0.925754	0.725552	1.72681	1.84765	1.73987
Q9NYU1	UDP-glucose:glycoprotein glucosyltransferase 2 OS=Homo sapiens OX=9606 GN=UGGT2 PE=1 SV=4	UGGT2	2.19746	0.000103897	Up	27	39	334	35	35	174.6	3.05294e+07	2.99325e+07	3.21276e+07	2.78159e+07	2.46706e+07	3.07166e+07	0.607696	0.653983	0.558742	1.31009	1.29382	1.39639
Q96BJ3	Axin interactor, dorsalization-associated protein OS=Homo sapiens OX=9606 GN=AIDA PE=1 SV=1	AIDA	2.19729	0.000610722	Up	32	8	87	8	8	35	1.04174e+07	9.88884e+06	1.54519e+07	1.09691e+07	9.5106e+06	1.11185e+07	0.631554	0.658041	0.818464	1.57348	1.5191	1.53943
P78356	Phosphatidylinositol 5-phosphate 4-kinase type-2 beta OS=Homo sapiens OX=9606 GN=PIP4K2B PE=1 SV=1	PIP4K2B	2.19388	0.000117788	Up	30	11	58	5	5	47.3	1.07607e+07	1.00782e+07	1.21203e+07	9.22735e+06	8.83615e+06	11382294	0.896455	0.921564	0.882199	1.81889	1.93945	2.16562
Q92805	Golgin subfamily A member 1 OS=Homo sapiens OX=9606 GN=GOLGA1 PE=1 SV=3	GOLGA1	2.19347	0.00664034	Up	11	6	25	6	6	88.1	2.89104e+06	3.05313e+06	5.49098e+06	3325814	3.31559e+06	3.33231e+06	0.680957	0.789346	1.13001	1.85355	2.05757	1.79257
P19634	Sodium/hydrogen exchanger 1 OS=Homo sapiens OX=9606 GN=SLC9A1 PE=1 SV=2	SLC9A1	2.19093	0.0165921	Up	16	8	73	8	8	90.7	2.79194e+06	4.82232e+06	5.31513e+06	3.52578e+06	3.96075e+06	3.98906e+06	0.35778	0.678302	0.5951	1.06907	1.33726	1.16747
Q9UBV2	Protein sel-1 homolog 1 OS=Homo sapiens OX=9606 GN=SEL1L PE=1 SV=3	SEL1L	2.18685	0.00101997	Up	33	17	139	17	17	88.7	4.46649e+07	3.56264e+07	4.81026e+07	4.19122e+07	3.7439e+07	3.38418e+07	0.834144	0.730301	0.784889	1.85206	1.84216	1.44342
Q9BSJ8	Extended synaptotagmin-1 OS=Homo sapiens OX=9606 GN=ESYT1 PE=1 SV=1	ESYT1	2.1866	0.000132788	Up	32	29	350	29	29	122.8	9.31217e+07	9.0928e+07	9.68448e+07	8.74728e+07	7.29316e+07	9.09643e+07	0.958452	1.02724	0.870885	2.13026	1.97771	2.13823
O00161	Synaptosomal-associated protein 23 OS=Homo sapiens OX=9606 GN=SNAP23 PE=1 SV=1	SNAP23	2.17718	0.000202476	Up	42	7	96	7	7	23.3	4.13191e+07	4.53078e+07	5.6148e+07	4.28287e+07	3.91748e+07	4.39992e+07	0.710552	0.855211	0.843614	1.74269	1.77492	1.72804
Q7Z4W1	L-xylulose reductase OS=Homo sapiens OX=9606 GN=DCXR PE=1 SV=2	DCXR	2.17615	0.000230214	Up	27	7	52	7	7	25.9	1.04177e+07	1.01978e+07	1.4388e+07	1.09e+07	8.8852e+06	1.10273e+07	0.809458	0.869734	0.976756	2.00397	1.81893	1.95685
O00471	Exocyst complex component 5 OS=Homo sapiens OX=9606 GN=EXOC5 PE=1 SV=1	EXOC5	2.17528	0.0386777	Up	18	10	65	10	10	81.8	1.18036e+07	1.16458e+07	1.0748e+07	1.39367e+07	9.7115e+06	6.7196e+06	0.868169	0.940189	0.690689	2.42544	1.88193	1.12875
Q13308	Inactive tyrosine-protein kinase 7 OS=Homo sapiens OX=9606 GN=PTK7 PE=1 SV=2	PTK7	2.16891	3.65725e-06	Up	48	39	618	39	39	118.3	2.29151e+08	2.00843e+08	2.51776e+08	1.9782e+08	1.85535e+08	2.169e+08	0.653203	0.628404	0.627054	1.33425	1.39341	1.41205
Q9UEU0	Vesicle transport through interaction with t-SNAREs homolog 1B OS=Homo sapiens OX=9606 GN=VTI1B PE=1 SV=3	VTI1B	2.16402	0.000515531	Up	28	5	29	5	5	26.7	9.74081e+06	1.0311e+07	1.08985e+07	9.51291e+06	9.02201e+06	8712500	0.866106	1.00631	0.846657	2.00138	2.11352	1.76923
P48637	Glutathione synthetase OS=Homo sapiens OX=9606 GN=GSS PE=1 SV=1	GSS	2.15777	0.000419181	Up	37	16	148	16	16	52.4	4.27375e+07	4.0058e+07	4.88543e+07	3.42821e+07	3.60841e+07	4.51034e+07	0.846084	0.870461	0.845029	1.60588	1.88212	2.03929
Q16832	Discoidin domain-containing receptor 2 OS=Homo sapiens OX=9606 GN=DDR2 PE=1 SV=2	DDR2	2.1568	4.79473e-05	Up	18	11	88	11	11	96.7	1.02006e+07	9.78277e+06	1.33655e+07	9.71807e+06	9.09036e+06	1.02467e+07	0.743342	0.782494	0.850967	1.67565	1.74531	1.70534
P49419	Alpha-aminoadipic semialdehyde dehydrogenase OS=Homo sapiens OX=9606 GN=ALDH7A1 PE=1 SV=5	ALDH7A1	2.15604	0.000511031	Up	47	18	184	18	18	58.5	4.94701e+07	5.21258e+07	6.54611e+07	5.48317e+07	4.44579e+07	46613227	0.743547	0.859953	0.859635	1.95002	1.76053	1.60007
Q5TAQ9	DDB1- and CUL4-associated factor 8 OS=Homo sapiens OX=9606 GN=DCAF8 PE=1 SV=1	DCAF8	2.15042	0.00272363	Up	18	6	29	6	6	66.8	1.83491e+06	1.72756e+06	2.84424e+06	1.78168e+06	1.91994e+06	1.79226e+06	0.749581	0.774628	1.01516	1.72216	2.06642	1.67213
P49821	NADH dehydrogenase [ubiquinone] flavoprotein 1, mitochondrial OS=Homo sapiens OX=9606 GN=NDUFV1 PE=1 SV=4	NDUFV1	2.14665	0.000152339	Up	37	16	255	16	16	50.8	7.21177e+07	7.08795e+07	9.37658e+07	7.31124e+07	6.52247e+07	6.69223e+07	0.766444	0.826827	0.870658	1.83853	1.82632	1.62433
Q8NCG7	Diacylglycerol lipase-beta OS=Homo sapiens OX=9606 GN=DAGLB PE=1 SV=2	DAGLB	2.1449	0.00607348	Up	5	3	11	3	3	73.7	663688	852814	804627	799207	514931	740637	0.773796	1.09137	0.819637	2.20477	1.58175	1.97212
Q9UID3	Vacuolar protein sorting-associated protein 51 homolog OS=Homo sapiens OX=9606 GN=VPS51 PE=1 SV=2	VPS51	2.14411	0.00067169	Up	10	7	29	7	7	86	3.05332e+06	2.13863e+06	3.11605e+06	2.37212e+06	2.16271e+06	2.67372e+06	0.93062	0.715471	0.829793	1.71071	1.73671	1.86115
P16333	Cytoplasmic protein NCK1 OS=Homo sapiens OX=9606 GN=NCK1 PE=1 SV=1	NCK1	2.14307	0.000153342	Up	37	11	77	10	11	42.8	1.53698e+07	1.62683e+07	1.77519e+07	1.54006e+07	1.31396e+07	1.46187e+07	0.838122	0.973725	0.845765	1.9871	1.88776	1.82059
P55899	IgG receptor FcRn large subunit p51 OS=Homo sapiens OX=9606 GN=FCGRT PE=1 SV=1	FCGRT	2.13953	0.000515393	Up	20	5	33	5	5	39.7	2.97881e+06	2.43629e+06	3.89482e+06	2.60823e+06	2439333	2.96738e+06	0.509807	0.457665	0.582391	1.05621	1.09992	1.15985
Q9UG01	Intraflagellar transport protein 172 homolog OS=Homo sapiens OX=9606 GN=IFT172 PE=1 SV=2	IFT172	2.13713	0.000668977	Up	1	2	2	2	2	197.5	2.5181e+06	2.33032e+06	2410184	1.97004e+06	2.09744e+06	2.25971e+06	0.703302	0.714399	0.588144	1.30192	1.54343	1.44141
Q96EM0	Trans-3-hydroxy-L-proline dehydratase OS=Homo sapiens OX=9606 GN=L3HYPDH PE=1 SV=2	L3HYPDH	2.13669	0.0148667	Up	29	7	75	7	7	38.1	1.31587e+07	1.25233e+07	1.52512e+07	1.33179e+07	7.43712e+06	1.52603e+07	0.821304	0.857952	0.831686	1.96683	1.22299	2.17529
P62166	Neuronal calcium sensor 1 OS=Homo sapiens OX=9606 GN=NCS1 PE=1 SV=2	NCS1	2.13251	0.000355587	Up	37	6	46	6	6	21.9	5.75233e+06	5.13772e+06	5.91387e+06	4.75265e+06	4.13723e+06	5.76472e+06	0.862858	0.845905	0.775054	1.68683	1.63506	1.97487
Q32P44	Echinoderm microtubule-associated protein-like 3 OS=Homo sapiens OX=9606 GN=EML3 PE=1 SV=1	EML3	2.12925	0.00504344	Up	6	4	14	4	4	95.1	3.65566e+06	2.08688e+06	3.30538e+06	2.75302e+06	2429778	2.58095e+06	0.976631	0.611953	0.771527	1.74026	1.71025	1.57475
Q9H5V8	CUB domain-containing protein 1 OS=Homo sapiens OX=9606 GN=CDCP1 PE=1 SV=3	CDCP1	2.12835	0.00557523	Up	18	12	50	12	12	92.9	2.3184e+07	1.5406e+07	2.51487e+07	1.73803e+07	1.44614e+07	2.31514e+07	0.817151	0.596016	0.77445	1.44948	1.34292	1.86361
Q5VT25	Serine/threonine-protein kinase MRCK alpha OS=Homo sapiens OX=9606 GN=CDC42BPA PE=1 SV=1	CDC42BPA	2.12272	0.000622227	Up	10	14	102	10	10	197.2	9.57949e+06	7.82626e+06	9.27892e+06	8.07281e+06	6.26722e+06	8.82939e+06	0.923961	0.828555	0.781941	1.84237	1.59263	1.94494
O76024	Wolframin OS=Homo sapiens OX=9606 GN=WFS1 PE=1 SV=2	WFS1	2.12117	0.00760627	Up	18	12	97	12	12	100.2	1.27139e+07	1.12828e+07	1.6675e+07	8.81268e+06	1.20326e+07	1.38306e+07	0.754475	0.734918	0.86456	1.23741	1.88128	1.87444
Q9H5K3	Protein O-mannose kinase OS=Homo sapiens OX=9606 GN=POMK PE=1 SV=1	POMK	2.11937	0.0121174	Up	24	4	27	4	4	40	1.9386e+06	1.03364e+06	2.02683e+06	1.41781e+06	1.16792e+06	1.67894e+06	0.838848	0.490928	0.766262	1.45162	1.33148	1.65919
Q13033	Striatin-3 OS=Homo sapiens OX=9606 GN=STRN3 PE=1 SV=3	STRN3	2.11877	0.000243558	Up	19	12	89	10	12	87.2	17221814	1.49195e+07	2.10694e+07	1.67796e+07	1.40694e+07	1.46325e+07	0.791648	0.75277	0.846195	1.82505	1.70395	1.53616
O14494	Phospholipid phosphatase 1 OS=Homo sapiens OX=9606 GN=PLPP1 PE=1 SV=1	PLPP1	2.11703	0.000158606	Up	15	3	30	3	3	32.1	3.99926e+06	3.37813e+06	4.31857e+06	3096743	3.22793e+06	3.7097e+06	0.797967	0.739841	0.752854	1.46201	1.69691	1.69048
Q99836	Myeloid differentiation primary response protein MyD88 OS=Homo sapiens OX=9606 GN=MYD88 PE=1 SV=1	MYD88	2.1161	0.000855926	Up	18	5	23	5	5	33.2	2.46311e+06	2.45942e+06	2.71395e+06	2.45951e+06	1.73569e+06	2.43006e+06	0.794661	0.870936	0.765004	1.87753	1.47536	1.79052
P23396	40S ribosomal protein S3 OS=Homo sapiens OX=9606 GN=RPS3 PE=1 SV=2	RPS3	2.11113	9.08465e-06	Up	63	18	726	18	18	26.7	6.55308e+08	5.67306e+08	7.02622e+08	5.69221e+08	4.88294e+08	5.9578e+08	0.876654	0.833021	0.821238	1.80179	1.72104	1.82026
Q8N4A0	Polypeptide N-acetylgalactosaminyltransferase 4 OS=Homo sapiens OX=9606 GN=GALNT4 PE=1 SV=2	GALNT4	2.1099	0.00391186	Up	8	4	32	3	3	66.6	5.25234e+06	4.64678e+06	6.74976e+06	5.74783e+06	3.47673e+06	5.04665e+06	0.867252	0.842172	0.973747	2.24563	1.51249	1.9031
Q0ZGT2	Nexilin OS=Homo sapiens OX=9606 GN=NEXN PE=1 SV=1	NEXN	2.10548	5.75835e-06	Up	28	17	90	17	17	80.6	7.27093e+07	6.71184e+07	7.97668e+07	6.57162e+07	5.58236e+07	6.67149e+07	0.805298	0.815951	0.771888	1.72219	1.62897	1.68754
Q8IZA0	Dyslexia-associated protein KIAA0319-like protein OS=Homo sapiens OX=9606 GN=KIAA0319L PE=1 SV=2	KIAA0319L	2.10488	0.0320456	Up	4	4	20	4	4	115.6	947166	930082	1.20481e+06	1.28981e+06	689874	651860	0.857073	0.923779	0.952521	2.76158	1.64471	1.34713
Q9Y320	Thioredoxin-related transmembrane protein 2 OS=Homo sapiens OX=9606 GN=TMX2 PE=1 SV=1	TMX2	2.10036	0.0119232	Up	27	8	60	8	8	34	1.1537e+07	1.10694e+07	8.20982e+06	8.23695e+06	8.56257e+06	9.96909e+06	0.957036	1.0079	0.595024	1.61675	1.87141	1.88867
P62857	40S ribosomal protein S28 OS=Homo sapiens OX=9606 GN=RPS28 PE=1 SV=1	RPS28	2.09603	0.000995199	Up	52	5	91	5	5	7.8	3.36502e+07	3.9241e+07	3.80382e+07	3.19932e+07	3.02909e+07	3.28238e+07	0.802609	1.02734	0.792686	1.80558	1.90352	1.78801
P25398	40S ribosomal protein S12 OS=Homo sapiens OX=9606 GN=RPS12 PE=1 SV=3	RPS12	2.09591	2.45911e-05	Up	55	8	314	8	8	14.5	1.55337e+08	1.51482e+08	1.9297e+08	1.43705e+08	1.35321e+08	1.44876e+08	0.838825	0.897868	0.910438	1.83615	1.92526	1.78673
Q9UNL2	Translocon-associated protein subunit gamma OS=Homo sapiens OX=9606 GN=SSR3 PE=1 SV=1	SSR3	2.09446	0.00207415	Up	12	2	46	2	2	21.1	4.21227e+06	5.08547e+06	4826479	3771277	3.76984e+06	4593228	0.786122	1.04174	0.786989	1.66534	1.85363	1.95775
P62244	40S ribosomal protein S15a OS=Homo sapiens OX=9606 GN=RPS15A PE=1 SV=2	RPS15A	2.09174	0.000114644	Up	58	7	337	7	7	14.8	2.22842e+08	1.8449e+08	2.41548e+08	1.97884e+08	1.72149e+08	1.79248e+08	0.905353	0.822717	0.857412	1.90227	1.84269	1.66318
Q10589	Bone marrow stromal antigen 2 OS=Homo sapiens OX=9606 GN=BST2 PE=1 SV=1	BST2	2.08842	0.000374834	Up	24	6	48	6	6	19.8	3.14124e+07	3.17448e+07	3.93367e+07	2.69873e+07	2.95122e+07	30009312	0.60692	0.673222	0.664039	1.23376	1.50231	1.32419
Q8TDW0	Volume-regulated anion channel subunit LRRC8C OS=Homo sapiens OX=9606 GN=LRRC8C PE=1 SV=2	LRRC8C	2.08644	0.0236958	Up	5	3	13	3	3	92.4	837955	902787	1.01385e+06	981995	474219	915599	0.939996	1.11159	0.993674	2.60649	1.40156	2.34572
Q93050	V-type proton ATPase 116 kDa subunit a1 OS=Homo sapiens OX=9606 GN=ATP6V0A1 PE=1 SV=3	ATP6V0A1	2.07922	0.00633562	Up	15	10	53	10	10	96.4	6.34674e+06	7.0098e+06	9.93569e+06	8.02272e+06	5.03841e+06	6.56181e+06	0.574253	0.696168	0.785445	1.71757	1.20108	1.35594
P63000	Ras-related C3 botulinum toxin substrate 1 OS=Homo sapiens OX=9606 GN=RAC1 PE=1 SV=1	RAC1	2.0781	0.000407845	Up	39	7	147	3	6	21.4	7.68199e+07	8.78463e+07	9.69621e+07	7.35357e+07	6.76446e+07	8.04989e+07	0.748452	0.93944	0.825386	1.69523	1.7364	1.7912
Q8NBF6	Late secretory pathway protein AVL9 homolog OS=Homo sapiens OX=9606 GN=AVL9 PE=1 SV=1	AVL9	2.07682	0.0113255	Up	5	2	10	2	2	71.9	649939	638809	1.02708e+06		623394	643953	0.763985	0.824212	1.05483		1.93064	1.72874
P62241	40S ribosomal protein S8 OS=Homo sapiens OX=9606 GN=RPS8 PE=1 SV=2	RPS8	2.07675	0.00073676	Up	61	14	257	14	14	24.2	2.04501e+08	1.9014e+08	2.25876e+08	1.79197e+08	1.81107e+08	1.60608e+08	0.869558	0.887429	0.839149	1.80292	2.02893	1.55968
Q86SJ2	Amphoterin-induced protein 2 OS=Homo sapiens OX=9606 GN=AMIGO2 PE=1 SV=1	AMIGO2	2.0722	0.000838459	Up	11	4	13	4	4	57.9	1.58965e+06	1.87265e+06	2.20561e+06	1.56169e+06	1.44802e+06	1.76738e+06	0.55832	0.721926	0.67682	1.29783	1.33993	1.41767
P63096	Guanine nucleotide-binding protein G(i) subunit alpha-1 OS=Homo sapiens OX=9606 GN=GNAI1 PE=1 SV=2	GNAI1	2.07155	1.84933e-05	Up	30	10	266	3	3	40.3	2409370	2.08679e+06	2.87712e+06	2.13685e+06	1.83554e+06	2.21176e+06	0.741386	0.704815	0.773508	1.55581	1.4881	1.55433
P11171	Protein 4.1 OS=Homo sapiens OX=9606 GN=EPB41 PE=1 SV=4	EPB41	2.07039	0.0030775	Up	6	5	7	5	5	97	2.30828e+06	1.95461e+06	2.93843e+06	1.66669e+06	2.0778e+06	2.24113e+06	0.672555	0.62511	0.748033	1.14904	1.59504	1.49132
Q14699	Raftlin OS=Homo sapiens OX=9606 GN=RFTN1 PE=1 SV=4	RFTN1	2.06584	1.78334e-06	Up	33	13	77	13	13	63.1	3.25679e+07	3.10896e+07	3.93446e+07	2.93435e+07	2.64596e+07	3.04957e+07	0.832336	0.872126	0.878533	1.77444	1.78163	1.77997
P36269	Glutathione hydrolase 5 proenzyme OS=Homo sapiens OX=9606 GN=GGT5 PE=1 SV=2	GGT5	2.06319	4.67426e-05	Up	14	8	57	8	8	62.2	1.68099e+07	1.55331e+07	1.73865e+07	1.40863e+07	1.31303e+07	1.45699e+07	0.732224	0.742664	0.661693	1.45184	1.50689	1.44944
Q96EY7	Pentatricopeptide repeat domain-containing protein 3, mitochondrial OS=Homo sapiens OX=9606 GN=PTCD3 PE=1 SV=3	PTCD3	2.06295	0.00487188	Up	23	13	117	13	13	78.5	1.81443e+07	1.75871e+07	1.46063e+07	1.40025e+07	1.30596e+07	1.57809e+07	1.00564	1.06993	0.707307	1.83632	1.90705	1.99756
P61981	14-3-3 protein gamma OS=Homo sapiens OX=9606 GN=YWHAG PE=1 SV=2	YWHAG	2.06177	0.00227196	Up	73	17	752	11	14	28.3	1.36195e+08	1.18366e+08	1.46335e+08	1.13606e+08	1.21027e+08	9.83438e+07	0.856137	0.816702	0.803699	1.68975	2.00443	1.41187
P62913	60S ribosomal protein L11 OS=Homo sapiens OX=9606 GN=RPL11 PE=1 SV=2	RPL11	2.06076	0.000126984	Up	58	11	293	11	11	20.2	1.68697e+08	1.59488e+08	1.95864e+08	1.45533e+08	1.46945e+08	1.44295e+08	0.892745	0.926408	0.905605	1.82231	2.0488	1.74396
P27487	Dipeptidyl peptidase 4 OS=Homo sapiens OX=9606 GN=DPP4 PE=1 SV=2	DPP4	2.0589	7.53153e-06	Up	42	36	654	36	36	88.2	3.18302e+08	3.09109e+08	3.58851e+08	2.82102e+08	2.52244e+08	2.92212e+08	0.560782	0.597753	0.552375	1.17598	1.17086	1.17576
Q9H4M9	EH domain-containing protein 1 OS=Homo sapiens OX=9606 GN=EHD1 PE=1 SV=2	EHD1	2.05585	0.0116446	Up	65	28	362	19	28	60.6	1.16331e+08	1.21143e+08	1.16267e+08	1.31772e+08	7.83933e+07	8.88986e+07	0.922442	1.05438	0.805499	2.47235	1.63777	1.60992
P35914	Hydroxymethylglutaryl-CoA lyase, mitochondrial OS=Homo sapiens OX=9606 GN=HMGCL PE=1 SV=2	HMGCL	2.05321	2.02593e-05	Up	19	5	52	5	5	34.3	8.37156e+06	8.20107e+06	9.49526e+06	7.6796e+06	6.56422e+06	7.54821e+06	0.776021	0.834438	0.769022	1.68441	1.60316	1.598
Q14D04	Ventricular zone-expressed PH domain-containing protein homolog 1 OS=Homo sapiens OX=9606 GN=VEPH1 PE=1 SV=1	VEPH1	2.05216	0.0238328	Up	6	3	16	3	3	94.7	1.00658e+06	486949	1.05652e+06	696361	565570	840279	0.912043	0.484292	0.836394	1.49294	1.35015	1.73883
Q5VW32	BRO1 domain-containing protein BROX OS=Homo sapiens OX=9606 GN=BROX PE=1 SV=1	BROX	2.05132	0.0111537	Up	21	5	23	5	5	46.4	4.62798e+06	5.41526e+06	5.37916e+06		4.35696e+06	4.11836e+06	0.722821	0.928355	0.734038		1.79287	1.46902
O14672	Disintegrin and metalloproteinase domain-containing protein 10 OS=Homo sapiens OX=9606 GN=ADAM10 PE=1 SV=1	ADAM10	2.04878	0.0233381	Up	33	17	184	17	17	84.1	1.5003e+07	1.66853e+07	1.79293e+07	1.23953e+07	1.74616e+07	1.09548e+07	0.65989	0.805533	0.689003	1.29	2.02351	1.10044
O14617	AP-3 complex subunit delta-1 OS=Homo sapiens OX=9606 GN=AP3D1 PE=1 SV=1	AP3D1	2.04784	5.67258e-06	Up	41	38	402	38	38	130.1	9.55569e+07	9.14115e+07	1.15046e+08	8.64034e+07	7.45322e+07	9.02816e+07	0.800666	0.840709	0.842224	1.71301	1.64536	1.72764
Q14393	Growth arrest-specific protein 6 OS=Homo sapiens OX=9606 GN=GAS6 PE=1 SV=3	GAS6	2.04483	7.41155e-05	Up	18	10	47	10	10	74.9	4.23136e+06	4.42184e+06	5.02153e+06	3.92184e+06	3.53122e+06	3.92549e+06	0.593501	0.680769	0.615377	1.30158	1.30495	1.25747
Q86VS8	Protein Hook homolog 3 OS=Homo sapiens OX=9606 GN=HOOK3 PE=1 SV=2	HOOK3	2.04346	0.00259453	Up	20	11	64	11	11	83.1	15750642	12945424	1.97431e+07	1.57694e+07	1.03667e+07	1.39438e+07	0.910173	0.821103	0.996796	2.15616	1.57831	1.84023
Q96RT1	Erbin OS=Homo sapiens OX=9606 GN=ERBIN PE=1 SV=2	ERBIN	2.04307	0.00302244	Up	12	14	89	14	14	158.2	1.1394e+07	1.07819e+07	13220121	1.22314e+07	7.66912e+06	9.59312e+06	0.819619	0.851309	0.830877	2.08187	1.45348	1.57602
Q15678	Tyrosine-protein phosphatase non-receptor type 14 OS=Homo sapiens OX=9606 GN=PTPN14 PE=1 SV=2	PTPN14	2.04001	0.00295049	Up	5	4	22	4	4	135.2	3.86051e+06	2.52425e+06	4.13789e+06	2875331	2.46731e+06	3.32726e+06	1.24007	0.890003	1.16131	2.18541	2.08812	2.44093
P10586	Receptor-type tyrosine-protein phosphatase F OS=Homo sapiens OX=9606 GN=PTPRF PE=1 SV=2	PTPRF	2.02883	0.00489252	Up	4	5	20	5	5	212.7	1401083	1.54176e+06	2.11537e+06	1.66073e+06	1.23901e+06	1.23988e+06	0.852005	1.02908	1.1239	2.38956	1.98509	1.72195
P61201	COP9 signalosome complex subunit 2 OS=Homo sapiens OX=9606 GN=COPS2 PE=1 SV=1	COPS2	2.02832	7.01522e-06	Up	33	13	107	13	13	51.6	3.12444e+07	2.84816e+07	3.67429e+07	2.59381e+07	2.44867e+07	2.89031e+07	0.84432	0.844802	0.867508	1.65849	1.74339	1.78379
Q13563	Polycystin-2 OS=Homo sapiens OX=9606 GN=PKD2 PE=1 SV=3	PKD2	2.02551	0.0389012	Up	5	5	12	5	5	109.6	2.0821e+06	788028	1.5233e+06	1.18672e+06	1.09838e+06	1.2975e+06	1.01099	0.419992	0.64624	1.36343	1.40515	1.43885
O75955	Flotillin-1 OS=Homo sapiens OX=9606 GN=FLOT1 PE=1 SV=3	FLOT1	2.02345	2.21115e-05	Up	51	18	251	18	18	47.3	5.55094e+07	4.84128e+07	5.76104e+07	4.59254e+07	3.96767e+07	4.75051e+07	0.916122	0.877007	0.830717	1.79342	1.72524	1.79057
P46939	Utrophin OS=Homo sapiens OX=9606 GN=UTRN PE=1 SV=2	UTRN	2.02313	7.34728e-06	Up	19	50	324	50	50	394.2	7.24676e+07	6.69681e+07	8.79706e+07	6.49525e+07	5.53716e+07	6.62261e+07	0.884008	0.896677	0.937594	1.87477	1.77962	1.84504
P46020	Phosphorylase b kinase regulatory subunit alpha, skeletal muscle isoform OS=Homo sapiens OX=9606 GN=PHKA1 PE=1 SV=2	PHKA1	2.02279	0.0110424	Up	6	4	11	3	4	137.2	2.86402e+06	3.52774e+06	3.70786e+06	2.42324e+06	3.2425e+06	2584303	0.720954	0.974728	0.815493	1.44334	2.1505	1.48573
Q14980	Nuclear mitotic apparatus protein 1 OS=Homo sapiens OX=9606 GN=NUMA1 PE=1 SV=2	NUMA1	2.02185	1.68738e-05	Up	32	53	292	53	53	238.1	1.18912e+08	1.01974e+08	1.28112e+08	9.43902e+07	8.72388e+07	1.0502e+08	0.96718	0.910388	0.910411	1.81656	1.86948	1.95083
Q9UPQ0	LIM and calponin homology domains-containing protein 1 OS=Homo sapiens OX=9606 GN=LIMCH1 PE=1 SV=4	LIMCH1	2.01615	0.000191753	Up	23	19	99	19	19	121.8	2.64529e+07	2.71903e+07	3.22988e+07	2.55266e+07	2.17758e+07	2.30438e+07	0.837536	0.944932	0.893474	1.91233	1.81648	1.66628
O14681	Etoposide-induced protein 2.4 homolog OS=Homo sapiens OX=9606 GN=EI24 PE=1 SV=4	EI24	2.01366	0.0014211	Up	8	3	28	3	3	38.9	5.89015e+06	5.2936e+06	5.83653e+06	5.4589e+06	4.15538e+06	4.3632e+06	0.900865	0.888668	0.779925	1.97551	1.67445	1.52406
P08397	Porphobilinogen deaminase OS=Homo sapiens OX=9606 GN=HMBS PE=1 SV=2	HMBS	2.01304	0.00230982	Up	16	4	19	4	4	39.3	5735434	7.12058e+06	8.6183e+06	6197319	5.50498e+06	5810186	0.748755	1.02034	0.983014	1.91433	1.89346	1.73232
Q6ZXV5	Protein O-mannosyl-transferase TMTC3 OS=Homo sapiens OX=9606 GN=TMTC3 PE=1 SV=2	TMTC3	2.01154	0.0004975	Up	21	15	115	15	15	103.9	1.8708e+07	1.59758e+07	1.97516e+07	1.33408e+07	1.46692e+07	1.63775e+07	0.805684	0.755191	0.743198	1.35944	1.66445	1.61083
O00330	Pyruvate dehydrogenase protein X component, mitochondrial OS=Homo sapiens OX=9606 GN=PDHX PE=1 SV=3	PDHX	2.01132	0.000182629	Up	22	9	77	9	9	54.1	14605104	1.30607e+07	1.63882e+07	1.17804e+07	1.21605e+07	1.1864e+07	0.896407	0.879881	0.878814	1.7108	1.96644	1.66302
Q15397	Pumilio homolog 3 OS=Homo sapiens OX=9606 GN=PUM3 PE=1 SV=3	PUM3	2.01091	5.65112e-05	Up	21	13	54	13	13	73.5	2.73271e+07	2.7468e+07	3.07976e+07	2.4042e+07	2.08332e+07	2.53586e+07	0.909371	1.0033	0.895427	1.89304	1.82655	1.92725
O95793	Double-stranded RNA-binding protein Staufen homolog 1 OS=Homo sapiens OX=9606 GN=STAU1 PE=1 SV=2	STAU1	2.00974	0.000700653	Up	34	14	121	12	14	63.1	2.9587e+07	2.51576e+07	3.55029e+07	2.18697e+07	2.3349e+07	28038492	0.892095	0.832598	0.935276	1.56025	1.85484	1.93077
Q53EP0	Fibronectin type III domain-containing protein 3B OS=Homo sapiens OX=9606 GN=FNDC3B PE=1 SV=2	FNDC3B	2.00703	2.19536e-06	Up	39	31	375	31	31	132.8	1.21529e+08	1.09626e+08	1.35167e+08	1.04623e+08	8.92689e+07	1.04951e+08	0.91293	0.903911	0.887138	1.85961	1.76679	1.80057
Q9Y5M8	Signal recognition particle receptor subunit beta OS=Homo sapiens OX=9606 GN=SRPRB PE=1 SV=3	SRPRB	2.00696	0.00014412	Up	42	11	134	11	11	29.7	3.92033e+07	3.81462e+07	4.11534e+07	3.3009e+07	2.86197e+07	3.5627e+07	0.872982	0.932372	0.800669	1.73923	1.6791	1.81187
P12235	ADP/ATP translocase 1 OS=Homo sapiens OX=9606 GN=SLC25A4 PE=1 SV=4	SLC25A4	2.00367	0.000530824	Up	50	15	375	4	4	33	2.43595e+07	2.03352e+07	2.92575e+07	1.99915e+07	1.67372e+07	2.33599e+07	0.731401	0.670179	0.767517	1.42027	1.32403	1.60185
P08708	40S ribosomal protein S17 OS=Homo sapiens OX=9606 GN=RPS17 PE=1 SV=2	RPS17	2.00356	1.76148e-05	Up	57	9	144	9	9	15.5	9.19599e+07	7.62529e+07	1.01468e+08	7.47435e+07	6.79859e+07	7.60067e+07	0.888394	0.808573	0.856453	1.70853	1.73043	1.67697
P23634	Plasma membrane calcium-transporting ATPase 4 OS=Homo sapiens OX=9606 GN=ATP2B4 PE=1 SV=2	ATP2B4	2.00187	0.000132466	Up	32	33	426	20	36	137.8	2.15161e+08	2.21242e+08	2.65263e+08	1.82297e+08	1.8214e+08	2.05617e+08	0.775336	0.875086	0.835159	1.55434	1.72926	1.6922
P78357	Contactin-associated protein 1 OS=Homo sapiens OX=9606 GN=CNTNAP1 PE=1 SV=1	CNTNAP1	1.99942	0.00196032	Up	4	5	26	5	5	156.2	1.93237e+06	2189639	2.64837e+06	1.63862e+06	1.85885e+06	1.97948e+06	0.661843	0.823178	0.792517	1.32796	1.6774	1.54839
P24539	ATP synthase F(0) complex subunit B1, mitochondrial OS=Homo sapiens OX=9606 GN=ATP5PB PE=1 SV=2	ATP5PB	1.99779	0.000925036	Up	35	12	167	12	12	28.9	9.02696e+07	8.41196e+07	9.87752e+07	7.23858e+07	6.07052e+07	9.0198e+07	0.826175	0.845053	0.789848	1.56756	1.46381	1.88535
Q96N66	Lysophospholipid acyltransferase 7 OS=Homo sapiens OX=9606 GN=MBOAT7 PE=1 SV=2	MBOAT7	1.99316	0.00018578	Up	20	8	137	8	8	52.7	3.97172e+07	3.28221e+07	4.82996e+07	3.45993e+07	2.95656e+07	3.29781e+07	0.868644	0.787927	0.922936	1.79049	1.70364	1.64723
Q09666	Neuroblast differentiation-associated protein AHNAK OS=Homo sapiens OX=9606 GN=AHNAK PE=1 SV=2	AHNAK	1.9901	3.27998e-06	Up	67	245	4646	245	245	628.7	2.86861e+09	2.53497e+09	3.11747e+09	2.3172e+09	2.08907e+09	2.48698e+09	1.06359	1.03164	1.00988	2.03286	2.04071	2.10591
P62888	60S ribosomal protein L30 OS=Homo sapiens OX=9606 GN=RPL30 PE=1 SV=2	RPL30	1.98611	0.000495559	Up	70	12	222	12	12	12.8	9.81486e+07	1.02883e+08	1.2869e+08	8.53156e+07	8.91934e+07	9.00538e+07	0.791389	0.910549	0.906598	1.6277	1.89481	1.65834
O95168	NADH dehydrogenase [ubiquinone] 1 beta subcomplex subunit 4 OS=Homo sapiens OX=9606 GN=NDUFB4 PE=1 SV=3	NDUFB4	1.98533	0.0026938	Up	41	4	54	4	4	15.2	1.35399e+07	1.20603e+07	1.63136e+07	1.12484e+07	1.21862e+07	9.95608e+06	0.821654	0.803316	0.864942	1.61512	1.94835	1.37983
P07947	Tyrosine-protein kinase Yes OS=Homo sapiens OX=9606 GN=YES1 PE=1 SV=3	YES1	1.98119	2.70706e-06	Up	21	10	66	6	9	60.8	23243561	2.05428e+07	2.66346e+07	1.87513e+07	1.76848e+07	2.00823e+07	0.78867	0.765082	0.789594	1.50544	1.58096	1.55622
Q6UB35	Monofunctional C1-tetrahydrofolate synthase, mitochondrial OS=Homo sapiens OX=9606 GN=MTHFD1L PE=1 SV=1	MTHFD1L	1.97698	7.02956e-05	Up	24	17	121	17	17	105.7	3.03309e+07	2.65235e+07	3.29414e+07	2.56322e+07	2.26959e+07	2.36328e+07	1.0069	0.966468	0.95545	2.01339	1.98507	1.79177
P11532	Dystrophin OS=Homo sapiens OX=9606 GN=DMD PE=1 SV=3	DMD	1.97644	0.0364508	Up	1	4	8	4	4	426.5	1.16995e+07	1.3324e+07	8.85715e+06	8.88561e+06	1.06574e+07	7.97779e+06	0.999382	1.24926	0.661031	1.79594	2.39851	1.55636
Q9HD26	Golgi-associated PDZ and coiled-coil motif-containing protein OS=Homo sapiens OX=9606 GN=GOPC PE=1 SV=1	GOPC	1.97263	0.0109171	Up	44	20	197	20	20	50.5	9.16508e+07	8.57723e+07	1.08638e+08	7.97861e+07	8.62688e+07	6.02803e+07	0.79245	0.814027	0.820697	1.63231	1.96525	1.19036
P61006	Ras-related protein Rab-8A OS=Homo sapiens OX=9606 GN=RAB8A PE=1 SV=1	RAB8A	1.97204	1.69449e-05	Up	47	10	229	4	7	23.7	4.37635e+07	4.25612e+07	4.99113e+07	3.71529e+07	3.44649e+07	3.75302e+07	0.848015	0.905233	0.844997	1.70343	1.75953	1.66088
P34897	Serine hydroxymethyltransferase, mitochondrial OS=Homo sapiens OX=9606 GN=SHMT2 PE=1 SV=3	SHMT2	1.96814	0.000124275	Up	54	23	522	23	23	56	3.11832e+08	3.04515e+08	3.50322e+08	2.48573e+08	2.3427e+08	2.92747e+08	0.897904	0.962441	0.881337	1.69357	1.77727	1.92516
P62854	40S ribosomal protein S26 OS=Homo sapiens OX=9606 GN=RPS26 PE=1 SV=3	RPS26	1.95991	0.000107002	Up	37	3	94	3	3	13	104477544	1.01904e+08	1.20006e+08	9.55016e+07	7.70842e+07	8.77571e+07	0.860056	0.920771	0.863122	1.86018	1.67185	1.64988
Q15165	Serum paraoxonase/arylesterase 2 OS=Homo sapiens OX=9606 GN=PON2 PE=1 SV=4	PON2	1.95863	0.00644131	Up	42	8	117	8	8	39.4	2.73347e+07	22131119	3.99106e+07	2.14911e+07	2.46671e+07	2.34579e+07	0.733872	0.652177	0.936182	1.36523	1.74483	1.43833
P06396	Gelsolin OS=Homo sapiens OX=9606 GN=GSN PE=1 SV=1	GSN	1.95854	0.000702539	Up	38	24	440	10	24	85.6	2.20258e+08	2.14842e+08	2.56373e+08	175063941	1.92047e+08	1.80284e+08	0.733639	0.785462	0.746084	1.37971	1.68533	1.37142
Q7L523	Ras-related GTP-binding protein A OS=Homo sapiens OX=9606 GN=RRAGA PE=1 SV=1	RRAGA	1.95689	2.81882e-05	Up	29	8	60	8	8	36.5	1.11271e+07	9.93539e+06	1.24426e+07	9.39605e+06	8.34001e+06	8.83737e+06	0.782652	0.767059	0.764654	1.56378	1.54555	1.41963
Q8WZA9	Immunity-related GTPase family Q protein OS=Homo sapiens OX=9606 GN=IRGQ PE=1 SV=1	IRGQ	1.95423	0.00308743	Up	22	8	58	8	8	62.7	7.85774e+06	6.46928e+06	9.10856e+06	6.91904e+06	6161691	5.33278e+06	0.865783	0.78239	0.876851	1.80384	1.78871	1.34193
O75352	Mannose-P-dolichol utilization defect 1 protein OS=Homo sapiens OX=9606 GN=MPDU1 PE=1 SV=2	MPDU1	1.95338	0.000683183	Up	9	2	38	2	2	26.6	10799361	1.09451e+07	11219346	9.24354e+06	8.43481e+06	8.58898e+06	0.929715	1.03426	0.843887	1.88292	1.91317	1.68872
Q6ZS17	Rho family-interacting cell polarization regulator 1 OS=Homo sapiens OX=9606 GN=RIPOR1 PE=1 SV=1	RIPOR1	1.95229	0.0122557	Up	1	2	2	2	2	132.2	408916	413199	700650	425184	298373	475829	0.691074	0.766488	1.03456	1.70023	1.32855	1.83656
P12107	Collagen alpha-1(XI) chain OS=Homo sapiens OX=9606 GN=COL11A1 PE=1 SV=4	COL11A1	1.95011	0.000489494	Up	15	20	187	20	20	181	4.4926e+07	4.29963e+07	4.74345e+07	3.57054e+07	3.04818e+07	4.18902e+07	0.932896	0.979991	0.860587	1.75432	1.66765	1.98661
O00159	Unconventional myosin-Ic OS=Homo sapiens OX=9606 GN=MYO1C PE=1 SV=4	MYO1C	1.94801	3.66422e-05	Up	54	48	650	47	48	121.6	2.60794e+08	2.30551e+08	3.21095e+08	2.1426e+08	1.94046e+08	2.31747e+08	0.834687	0.809932	0.897893	1.62259	1.63628	1.69396
P62280	40S ribosomal protein S11 OS=Homo sapiens OX=9606 GN=RPS11 PE=1 SV=3	RPS11	1.94316	2.54731e-05	Up	52	13	314	13	13	18.4	2.30042e+08	2.2533e+08	2.70856e+08	1.9551e+08	1.68921e+08	2.10085e+08	0.860976	0.925675	0.8857	1.73138	1.66569	1.79574
O15160	DNA-directed RNA polymerases I and III subunit RPAC1 OS=Homo sapiens OX=9606 GN=POLR1C PE=1 SV=1	POLR1C	1.93637	0.00340655	Up	16	3	19	3	3	39.2	2.99442e+06	2.89553e+06	3.2449e+06	2.15938e+06	2.66169e+06	2.32949e+06	0.885423	0.939771	0.838309	1.5108	2.0736	1.57313
Q27J81	Inverted formin-2 OS=Homo sapiens OX=9606 GN=INF2 PE=1 SV=2	INF2	1.93572	4.34122e-05	Up	26	20	183	20	20	135.5	3.86088e+07	3.23422e+07	4.15434e+07	3.1521e+07	2.65751e+07	3.02619e+07	1.03615	0.952714	0.974103	2.00161	1.87906	1.85481
P61247	40S ribosomal protein S3a OS=Homo sapiens OX=9606 GN=RPS3A PE=1 SV=2	RPS3A	1.93499	2.9775e-05	Up	65	20	753	20	20	29.9	5.20699e+08	4.94486e+08	5.59754e+08	4.18263e+08	3.78713e+08	4.45151e+08	0.869449	0.90629	0.816618	1.65252	1.66608	1.69758
Q9UJA5	tRNA (adenine(58)-N(1))-methyltransferase non-catalytic subunit TRM6 OS=Homo sapiens OX=9606 GN=TRMT6 PE=1 SV=1	TRMT6	1.93111	0.00644685	Up	8	3	8	3	3	55.8	1.02566e+06	784937	1.26573e+06	794021	749453		1.07354	0.901788	1.1575	1.96647	2.06674
P60866	40S ribosomal protein S20 OS=Homo sapiens OX=9606 GN=RPS20 PE=1 SV=1	RPS20	1.92338	0.000157948	Up	32	5	157	5	5	13.4	2.85037e+08	2.56356e+08	2.89628e+08	2.20126e+08	1.90471e+08	2.42345e+08	0.957819	0.945545	0.850332	1.75023	1.68632	1.85987
P62701	40S ribosomal protein S4, X isoform OS=Homo sapiens OX=9606 GN=RPS4X PE=1 SV=2	RPS4X	1.9173	0.000265269	Up	48	14	554	14	14	29.6	4.80862e+08	4.13764e+08	6.15897e+08	4.1404e+08	3.47911e+08	4.0639e+08	0.884688	0.835561	0.990017	1.80241	1.68642	1.70757
Q16563	Synaptophysin-like protein 1 OS=Homo sapiens OX=9606 GN=SYPL1 PE=1 SV=1	SYPL1	1.91709	8.31312e-05	Up	20	3	77	3	3	28.5	1.75479e+07	1.78241e+07	1.98324e+07	1.45172e+07	1.30833e+07	1.55641e+07	0.757456	0.844494	0.747951	1.48272	1.48792	1.53435
P39019	40S ribosomal protein S19 OS=Homo sapiens OX=9606 GN=RPS19 PE=1 SV=2	RPS19	1.91522	3.33283e-05	Up	62	12	351	12	12	16.1	2.98122e+08	2.92517e+08	3.47896e+08	2.52481e+08	2.3041e+08	2.46769e+08	0.89103	0.959633	0.908474	1.78553	1.81437	1.68443
Q96BY6	Dedicator of cytokinesis protein 10 OS=Homo sapiens OX=9606 GN=DOCK10 PE=1 SV=3	DOCK10	1.91267	0.00030435	Up	4	6	36	6	6	249.4	2.63728e+06	2.40723e+06	3.16429e+06	2.24957e+06	2.07167e+06	2.01631e+06	1.05619	1.05818	1.1072	2.13169	2.1859	1.84419
P51148	Ras-related protein Rab-5C OS=Homo sapiens OX=9606 GN=RAB5C PE=1 SV=2	RAB5C	1.90887	5.59155e-05	Up	58	9	227	6	10	23.5	1.01761e+08	9.1579e+07	1.19813e+08	8.51173e+07	7.67423e+07	7.98478e+07	0.860337	0.849842	0.885027	1.70273	1.70942	1.54175
P30626	Sorcin OS=Homo sapiens OX=9606 GN=SRI PE=1 SV=1	SRI	1.90677	0.00194526	Up	44	8	117	8	8	21.7	5.08767e+07	4.78104e+07	5.37189e+07	3.43957e+07	3.69849e+07	4.71743e+07	0.881326	0.909066	0.813036	1.40982	1.68799	1.86633
Q9HBR0	Putative sodium-coupled neutral amino acid transporter 10 OS=Homo sapiens OX=9606 GN=SLC38A10 PE=1 SV=2	SLC38A10	1.90355	0.00148094	Up	7	6	37	6	6	119.7	1.08204e+07	1.21964e+07	1.32374e+07	9.70703e+06	9.35872e+06	8.9633e+06	0.771722	0.95478	0.824865	1.63811	1.75857	1.45998
Q9Y5X3	Sorting nexin-5 OS=Homo sapiens OX=9606 GN=SNX5 PE=1 SV=1	SNX5	1.89959	0.00496994	Up	33	14	87	13	13	46.8	1.94061e+07	1.79648e+07	2.26781e+07	13646529	1.27688e+07	2.01539e+07	0.874169	0.888252	0.892541	1.45452	1.51542	2.07339
Q13636	Ras-related protein Rab-31 OS=Homo sapiens OX=9606 GN=RAB31 PE=1 SV=1	RAB31	1.89722	0.000534378	Up	50	8	105	6	8	21.6	1.32844e+07	1.35589e+07	1.57679e+07	1.15111e+07	1.08141e+07	1.04419e+07	0.640587	0.717658	0.664319	1.31339	1.3739	1.14995
P62750	60S ribosomal protein L23a OS=Homo sapiens OX=9606 GN=RPL23A PE=1 SV=1	RPL23A	1.89717	4.86614e-06	Up	44	9	351	9	9	17.7	3.25923e+08	3.16826e+08	3.88726e+08	2.70972e+08	2.41711e+08	2.82174e+08	0.898029	0.958192	0.9358	1.76661	1.75468	1.77565
Q8TC12	Retinol dehydrogenase 11 OS=Homo sapiens OX=9606 GN=RDH11 PE=1 SV=2	RDH11	1.89704	0.000167275	Up	61	12	192	12	12	35.4	3.94453e+07	3.35578e+07	4.29055e+07	3.29285e+07	25697723	3.07378e+07	0.909357	0.849156	0.864205	1.79619	1.56085	1.61836
P29590	Protein PML OS=Homo sapiens OX=9606 GN=PML PE=1 SV=3	PML	1.89686	0.0363289	Up	39	30	321	30	30	97.5	1.20954e+08	1.07175e+08	1.34418e+08	6.22055e+07	1.02167e+08	1.13399e+08	0.867879	0.844091	0.842674	1.05611	1.93141	1.85829
Q9HDC9	Adipocyte plasma membrane-associated protein OS=Homo sapiens OX=9606 GN=APMAP PE=1 SV=2	APMAP	1.89607	0.0145026	Up	49	17	433	17	17	46.5	2.32479e+08	2.02718e+08	2.73534e+08	2.4342e+08	1.37695e+08	1.6511e+08	0.864504	0.82743	0.888707	2.1418	1.34905	1.40224
Q15833	Syntaxin-binding protein 2 OS=Homo sapiens OX=9606 GN=STXBP2 PE=1 SV=2	STXBP2	1.89393	0.00289071	Up	7	3	18	3	3	66.4	996572	730796	813662	676400	611333	675146	1.01147	0.814131	0.721525	1.62438	1.63474	1.56497
Q5EB52	Mesoderm-specific transcript homolog protein OS=Homo sapiens OX=9606 GN=MEST PE=1 SV=2	MEST	1.89232	0.000149713	Up	30	8	109	8	8	38.8	4.79671e+07	3.98885e+07	4.9013e+07	3.38343e+07	3.28142e+07	3.85942e+07	0.852167	0.77783	0.760776	1.42226	1.53593	1.56591
Q15046	Lysine--tRNA ligase OS=Homo sapiens OX=9606 GN=KARS1 PE=1 SV=3	KARS1	1.88153	0.000485185	Up	47	22	270	22	22	68	1.21752e+08	1.03292e+08	140396331	91575338	7.8732e+07	1.09064e+08	0.929314	0.865384	0.936282	1.65389	1.58331	1.90122
Q9NQS3	Nectin-3 OS=Homo sapiens OX=9606 GN=NECTIN3 PE=1 SV=1	NECTIN3	1.88032	0.000874554	Up	14	5	20	5	5	61	1.5544e+07	1.50412e+07	1.6334e+07	1.17113e+07	1.02539e+07	1.41776e+07	0.890694	0.946033	0.817759	1.58786	1.54805	1.85538
P42677	40S ribosomal protein S27 OS=Homo sapiens OX=9606 GN=RPS27 PE=1 SV=3	RPS27	1.87787	0.000675249	Up	40	4	104	2	4	9.5	7.69387e+07	7.16469e+07	79966632	6.0751e+07	4.81228e+07	6.69173e+07	0.941692	0.962537	0.855141	1.75937	1.55182	1.87054
Q9NXV6	CDKN2A-interacting protein OS=Homo sapiens OX=9606 GN=CDKN2AIP PE=1 SV=3	CDKN2AIP	1.87718	0.0306521	Up	9	5	19	5	5	61.1	6.34737e+06	3.94138e+06	4.79749e+06	3182264	4.52571e+06	3.70038e+06	1.2842	0.875269	0.84804	1.5234	2.41241	1.70981
Q99614	Tetratricopeptide repeat protein 1 OS=Homo sapiens OX=9606 GN=TTC1 PE=1 SV=1	TTC1	1.87655	0.000112678	Up	31	6	41	6	6	33.5	1.37105e+07	1.41116e+07	1.73849e+07	1.14309e+07	1.09012e+07	1.20543e+07	0.810832	0.916025	0.898282	1.59956	1.69855	1.62811
P55060	Exportin-2 OS=Homo sapiens OX=9606 GN=CSE1L PE=1 SV=3	CSE1L	1.87446	7.78331e-06	Up	39	32	341	32	32	110.3	2.10833e+08	1.87306e+08	2.30971e+08	1.67889e+08	1.42156e+08	1.69477e+08	0.920248	0.897375	0.880825	1.73393	1.63478	1.68944
P07996	Thrombospondin-1 OS=Homo sapiens OX=9606 GN=THBS1 PE=1 SV=2	THBS1	1.87441	0.000168206	Up	56	55	1311	16	60	129.3	1.08752e+09	9.78403e+08	1.1588e+09	7.76244e+08	8.00767e+08	876903934	0.933844	0.92217	0.869385	1.57716	1.81164	1.71971
P12931	Proto-oncogene tyrosine-protein kinase Src OS=Homo sapiens OX=9606 GN=SRC PE=1 SV=3	SRC	1.87336	0.00367426	Up	12	6	46	4	4	59.8	3.72051e+06	3.97917e+06	4.98749e+06	2.75014e+06	3.0779e+06	3.80891e+06	0.686808	0.806271	0.804415	1.20124	1.49698	1.60583
Q9H330	Transmembrane protein 245 OS=Homo sapiens OX=9606 GN=TMEM245 PE=1 SV=3	TMEM245	1.87332	0.00296962	Up	5	2	18	2	2	97.3	2.23561e+06	2.54666e+06	2.35955e+06	1.75474e+06	1.79292e+06	1.93127e+06	0.618178	0.772937	0.570046	1.14808	1.30619	1.21962
Q9UQE7	Structural maintenance of chromosomes protein 3 OS=Homo sapiens OX=9606 GN=SMC3 PE=1 SV=2	SMC3	1.8699	0.000215325	Up	15	16	61	16	16	141.5	5.18687e+07	4.17684e+07	5.82961e+07	3.78733e+07	3.73277e+07	3.94062e+07	0.970154	0.857509	0.952663	1.67614	1.83948	1.68331
P57105	Synaptojanin-2-binding protein OS=Homo sapiens OX=9606 GN=SYNJ2BP PE=1 SV=2	SYNJ2BP	1.86799	0.00115618	Up	34	3	58	3	3	15.9	6896120	7.33011e+06	7.20925e+06	5559094	5.25611e+06	5.55007e+06	0.837434	0.977039	0.764894	1.59732	1.68166	1.53925
Q8TCT8	Signal peptide peptidase-like 2A OS=Homo sapiens OX=9606 GN=SPPL2A PE=1 SV=2	SPPL2A	1.8635	0.00501364	Up	4	2	23	2	2	58.1	3.41616e+06	2.97957e+06	4862400	2.79588e+06	2.27023e+06	3.40677e+06	0.799693	0.765587	0.99449	1.54862	1.40018	1.82135
P62847	40S ribosomal protein S24 OS=Homo sapiens OX=9606 GN=RPS24 PE=1 SV=1	RPS24	1.86273	0.000121535	Up	24	4	131	4	4	15.4	4.4699e+07	4.57285e+07	5.29501e+07	3.82724e+07	3.37144e+07	3.65825e+07	0.87165	0.978785	0.902145	1.76592	1.73216	1.62923
Q8IXI1	Mitochondrial Rho GTPase 2 OS=Homo sapiens OX=9606 GN=RHOT2 PE=1 SV=2	RHOT2	1.86134	0.000265693	Up	24	11	82	9	11	68.1	1.35903e+07	1.35089e+07	1.43224e+07	1.05183e+07	9.93878e+06	1.09966e+07	0.897089	0.978774	0.826013	1.64283	1.72849	1.6578
P51149	Ras-related protein Rab-7a OS=Homo sapiens OX=9606 GN=RAB7A PE=1 SV=1	RAB7A	1.85809	0.00477524	Up	83	17	362	17	17	23.5	1.73683e+08	1.5211e+08	1.93531e+08	1.06675e+08	1.29893e+08	1.54344e+08	0.860195	0.826899	0.837443	1.2501	1.69493	1.74579
Q99873	Protein arginine N-methyltransferase 1 OS=Homo sapiens OX=9606 GN=PRMT1 PE=1 SV=3	PRMT1	1.85655	6.57188e-05	Up	55	20	211	20	20	42.4	2.01175e+08	1.69422e+08	2.04272e+08	1.47461e+08	1.34691e+08	1.51634e+08	0.964686	0.891739	0.855826	1.67313	1.70168	1.66063
Q8NBM8	Prenylcysteine oxidase-like OS=Homo sapiens OX=9606 GN=PCYOX1L PE=1 SV=2	PCYOX1L	1.85288	0.00165967	Up	24	9	56	9	9	54.6	1.26871e+07	1.06746e+07	1.45747e+07	1.04752e+07	7.43001e+06	1.07059e+07	0.894653	0.826233	0.897961	1.74781	1.38042	1.72418
Q13425	Beta-2-syntrophin OS=Homo sapiens OX=9606 GN=SNTB2 PE=1 SV=1	SNTB2	1.85278	0.0167112	Up	37	17	197	17	17	57.9	6.75171e+07	1.06418e+08	1.05496e+08	6.82487e+07	6.83643e+07	7.47363e+07	0.661492	1.14441	0.903052	1.58214	1.76469	1.67227
O15085	Rho guanine nucleotide exchange factor 11 OS=Homo sapiens OX=9606 GN=ARHGEF11 PE=1 SV=1	ARHGEF11	1.8466	0.0301789	Up	2	2	8	2	2	167.6	255196	353300	359424		235761	243888	0.630773	0.958512	0.776194		1.53532	1.37675
Q92930	Ras-related protein Rab-8B OS=Homo sapiens OX=9606 GN=RAB8B PE=1 SV=2	RAB8B	1.84652	0.000711245	Up	37	8	192	3	3	23.6	1.21905e+07	1.27637e+07	1.4644e+07	1.08806e+07	9.31692e+06	9507072	0.810049	0.930941	0.85019	1.71074	1.63114	1.44279
P19474	E3 ubiquitin-protein ligase TRIM21 OS=Homo sapiens OX=9606 GN=TRIM21 PE=1 SV=1	TRIM21	1.8461	0.00121535	Up	41	18	132	18	18	54.1	3.12771e+07	2.82339e+07	3.10857e+07	2.25346e+07	1.91042e+07	2.69014e+07	0.951512	0.94279	0.826254	1.6221	1.53124	1.86908
Q9NZB2	Constitutive coactivator of PPAR-gamma-like protein 1 OS=Homo sapiens OX=9606 GN=FAM120A PE=1 SV=2	FAM120A	1.84544	0.00168169	Up	35	30	233	30	30	121.8	9.36794e+07	8.54607e+07	9.26495e+07	7.24241e+07	6.80285e+07	6.33916e+07	0.940955	0.942208	0.813079	1.72127	1.80029	1.45419
Q6IQ22	Ras-related protein Rab-12 OS=Homo sapiens OX=9606 GN=RAB12 PE=1 SV=3	RAB12	1.8379	0.00265699	Up	40	9	78	8	8	27.2	8.04554e+06	7.20217e+06	1.10141e+07	7.4905e+06	5.73341e+06	6.20589e+06	0.859735	0.84475	1.02831	1.89392	1.61417	1.51453
P08865	40S ribosomal protein SA OS=Homo sapiens OX=9606 GN=RPSA PE=1 SV=4	RPSA	1.83727	0.000351215	Up	63	15	513	15	15	32.8	3.70842e+08	3.24664e+08	4.28251e+08	2.67865e+08	2.82921e+08	2.82114e+08	0.929805	0.893497	0.938136	1.58913	1.86894	1.61545
P01112	GTPase HRas OS=Homo sapiens OX=9606 GN=HRAS PE=1 SV=1	HRAS	1.83726	0.0132897	Up	62	9	108	2	10	21.3	7.4541e+07	5.10554e+07	5.30288e+07	4.19155e+07	4.49799e+07	4.70035e+07	1.09852	0.825864	0.682791	1.46159	1.74645	1.582
Q9UKG1	DCC-interacting protein 13-alpha OS=Homo sapiens OX=9606 GN=APPL1 PE=1 SV=1	APPL1	1.83468	3.91338e-05	Up	17	9	44	8	9	79.6	2.94789e+07	2.79734e+07	3.18488e+07	2.28448e+07	2.07887e+07	2.30509e+07	0.914398	0.95241	0.86314	1.67669	1.69894	1.63297
P62081	40S ribosomal protein S7 OS=Homo sapiens OX=9606 GN=RPS7 PE=1 SV=1	RPS7	1.83447	0.00121637	Up	37	8	289	8	8	22.1	3.16746e+08	2.31058e+08	3.55641e+08	2.23681e+08	2.13883e+08	2.29244e+08	0.999054	0.799935	0.980066	1.66936	1.77739	1.65136
Q6UW02	Cytochrome P450 20A1 OS=Homo sapiens OX=9606 GN=CYP20A1 PE=1 SV=1	CYP20A1	1.8338	0.000412372	Up	9	4	49	4	4	52.4	3.25214e+06	2.69039e+06	4.01053e+06	2.46891e+06	2.36999e+06	2.50404e+06	0.954653	0.866855	1.02859	1.71483	1.83295	1.67874
Q6NZI2	Caveolae-associated protein 1 OS=Homo sapiens OX=9606 GN=CAVIN1 PE=1 SV=1	CAVIN1	1.83341	4.12148e-05	Up	29	11	238	11	11	43.5	2.53394e+08	2.27078e+08	2.87276e+08	1.84152e+08	1.83956e+08	2.01997e+08	1.0138	0.997211	1.0042	1.7433	1.93909	1.84572
P32969	60S ribosomal protein L9 OS=Homo sapiens OX=9606 GN=RPL9 PE=1 SV=1	RPL9	1.82905	0.00203074	Up	66	10	205	10	10	21.9	1.12023e+08	7.96658e+07	1.28234e+08	7.73086e+07	7.19956e+07	8.63243e+07	1.01771	0.794411	1.01785	1.66183	1.72326	1.79108
P29373	Cellular retinoic acid-binding protein 2 OS=Homo sapiens OX=9606 GN=CRABP2 PE=1 SV=2	CRABP2	1.8282	9.9734e-05	Up	54	8	75	8	8	15.7	9.05352e+07	8.21582e+07	9.33859e+07	6.52686e+07	6.08754e+07	7.2127e+07	0.937661	0.933975	0.845035	1.59946	1.66111	1.70605
Q96CX2	BTB/POZ domain-containing protein KCTD12 OS=Homo sapiens OX=9606 GN=KCTD12 PE=1 SV=1	KCTD12	1.82743	0.00147477	Up	15	4	19	3	4	35.7	3.82176e+06	3.32214e+06	3.92295e+06	2.53747e+06	2.87487e+06	2.77287e+06	0.6981	0.666084	0.626083	1.09672	1.38357	1.15678
O60763	General vesicular transport factor p115 OS=Homo sapiens OX=9606 GN=USO1 PE=1 SV=2	USO1	1.82734	1.67909e-05	Up	41	32	377	32	32	107.8	2.00714e+08	1.78021e+08	2.243e+08	1.54111e+08	1.30831e+08	1.63146e+08	0.899738	0.875924	0.878485	1.63461	1.54518	1.67024
Q9P2E5	Chondroitin sulfate glucuronyltransferase OS=Homo sapiens OX=9606 GN=CHPF2 PE=2 SV=2	CHPF2	1.82417	0.0126448	Up	27	16	117	16	16	85.9	8.68615e+06	6.50259e+06	1.02131e+07	5.62286e+06	7.12863e+06	5.71683e+06	0.698888	0.574278	0.717963	1.07048	1.51117	1.05051
P63220	40S ribosomal protein S21 OS=Homo sapiens OX=9606 GN=RPS21 PE=1 SV=1	RPS21	1.82386	0.00323317	Up	70	7	232	7	7	9.1	1.28372e+08	1.11579e+08	109011153	8.4353e+07	8.29239e+07	9.33282e+07	1.02515	0.978038	0.760596	1.59389	1.74472	1.70214
O60610	Protein diaphanous homolog 1 OS=Homo sapiens OX=9606 GN=DIAPH1 PE=1 SV=2	DIAPH1	1.82373	0.000551054	Up	17	21	137	21	21	141.3	9.80815e+07	7.4315e+07	1.03588e+08	6.6763e+07	6.13542e+07	7.5783e+07	1.0327	0.85885	0.952926	1.66326	1.70199	1.82231
Q8NCN5	Pyruvate dehydrogenase phosphatase regulatory subunit, mitochondrial OS=Homo sapiens OX=9606 GN=PDPR PE=1 SV=2	PDPR	1.82316	0.00246358	Up	27	17	88	17	17	99.3	2.0273e+07	2.05779e+07	2.32431e+07	1.38841e+07	1.48349e+07	1.89276e+07	0.790066	0.880244	0.791417	1.28027	1.5232	1.68464
Q7Z2W4	Zinc finger CCCH-type antiviral protein 1 OS=Homo sapiens OX=9606 GN=ZC3HAV1 PE=1 SV=3	ZC3HAV1	1.82241	0.000979799	Up	42	31	239	31	31	101.4	4.96632e+07	5.16655e+07	5.17417e+07	3.82012e+07	3.39559e+07	4.22043e+07	0.939717	1.07305	0.855398	1.71033	1.6928	1.82383
P62263	40S ribosomal protein S14 OS=Homo sapiens OX=9606 GN=RPS14 PE=1 SV=3	RPS14	1.82045	0.000259868	Up	70	9	186	9	9	16.3	2.57382e+08	2.40854e+08	2.59051e+08	1.90909e+08	1.76106e+08	1.95352e+08	0.98099	1.00762	0.862653	1.72169	1.76843	1.70047
Q9BYV8	Centrosomal protein of 41 kDa OS=Homo sapiens OX=9606 GN=CEP41 PE=1 SV=1	CEP41	1.81785	0.000171619	Up	12	3	6	3	3	41.3	2.09131e+07	1.93687e+07	2.21084e+07	15840766	13307125	17179832	0.759326	0.771907	0.701345	1.3609	1.27298	1.4246
Q9NZV1	Cysteine-rich motor neuron 1 protein OS=Homo sapiens OX=9606 GN=CRIM1 PE=1 SV=1	CRIM1	1.81727	0.00115126	Up	6	4	8	4	4	113.7	4.58709e+06	4.90819e+06	4.999e+06	3.79498e+06	3.0718e+06	3.93675e+06	0.731109	0.858659	0.696134	1.43118	1.28992	1.433
Q12805	EGF-containing fibulin-like extracellular matrix protein 1 OS=Homo sapiens OX=9606 GN=EFEMP1 PE=1 SV=2	EFEMP1	1.81247	0.000352387	Up	6	3	28	3	3	54.6	2.67842e+06	2.29099e+06	2.92518e+06	2.10312e+06	1.60962e+06	2.11373e+06	0.991479	0.930856	0.946066	1.84208	1.56984	1.78698
Q15269	Periodic tryptophan protein 2 homolog OS=Homo sapiens OX=9606 GN=PWP2 PE=2 SV=2	PWP2	1.81188	0.00207117	Up	12	9	27	9	9	102.4	8.70483e+06	6.13218e+06	8.06923e+06	6.05229e+06	4.91309e+06	5.90084e+06	1.2876	0.995618	1.04284	2.11828	1.91471	1.99343
P08237	ATP-dependent 6-phosphofructokinase, muscle type OS=Homo sapiens OX=9606 GN=PFKM PE=1 SV=2	PFKM	1.80459	1.98141e-06	Up	32	20	256	17	17	85.1	4.60921e+07	4.16664e+07	5.29861e+07	3.50876e+07	3.2295e+07	3.55289e+07	0.850265	0.843665	0.853994	1.53152	1.56961	1.49684
P62851	40S ribosomal protein S25 OS=Homo sapiens OX=9606 GN=RPS25 PE=1 SV=1	RPS25	1.80195	0.000102024	Up	42	7	139	7	7	13.7	2.48359e+08	2.4374e+08	2.87257e+08	1.88923e+08	1.69307e+08	2.14016e+08	0.925896	0.997389	0.935659	1.66651	1.66297	1.82219
P54886	Delta-1-pyrroline-5-carboxylate synthase OS=Homo sapiens OX=9606 GN=ALDH18A1 PE=1 SV=2	ALDH18A1	1.80138	2.10328e-05	Up	51	37	785	37	37	87.2	3.03982e+08	2.94155e+08	3.49899e+08	2.4469e+08	2.09022e+08	2.40921e+08	0.892046	0.947483	0.897112	1.69901	1.61606	1.61465
P50613	Cyclin-dependent kinase 7 OS=Homo sapiens OX=9606 GN=CDK7 PE=1 SV=1	CDK7	1.7979	0.00827967	Up	5	2	5	2	2	39	2.88996e+06	2.94188e+06	2.54843e+06	2.30309e+06	1.90828e+06	1982408	0.921711	1.02987	0.710134	1.73802	1.60351	1.44398
Q99470	Stromal cell-derived factor 2 OS=Homo sapiens OX=9606 GN=SDF2 PE=1 SV=2	SDF2	1.79428	0.000131244	Up	39	5	63	5	5	23	1.00035e+07	8.202e+06	1.16628e+07	7.44702e+06	6.47171e+06	7.7564e+06	0.852609	0.767314	0.868493	1.50183	1.45326	1.50981
Q70UQ0	Inhibitor of nuclear factor kappa-B kinase-interacting protein OS=Homo sapiens OX=9606 GN=IKBIP PE=1 SV=1	IKBIP	1.79248	0.000375729	Up	39	14	295	14	14	39.3	2.03619e+08	1.89514e+08	234191742	1.67549e+08	1.26221e+08	1.64468e+08	0.819078	0.836765	0.823082	1.59474	1.33773	1.51096
P47756	F-actin-capping protein subunit beta OS=Homo sapiens OX=9606 GN=CAPZB PE=1 SV=4	CAPZB	1.78947	0.0120368	Up	49	15	329	15	15	31.3	2.22422e+08	2.02678e+08	2.22338e+08	1.69965e+08	1.69022e+08	1.29715e+08	0.889419	0.889591	0.776796	1.60816	1.78074	1.18464
P54289	Voltage-dependent calcium channel subunit alpha-2/delta-1 OS=Homo sapiens OX=9606 GN=CACNA2D1 PE=1 SV=3	CACNA2D1	1.78879	0.0323047	Up	21	19	146	19	19	124.5	2.896e+07	2.82191e+07	1.95303e+07	1.88609e+07	1.69014e+07	2.12693e+07	0.930411	0.995121	0.548214	1.43377	1.43063	1.56061
Q14126	Desmoglein-2 OS=Homo sapiens OX=9606 GN=DSG2 PE=1 SV=2	DSG2	1.78369	0.0209657	Up	14	10	103	10	10	122.2	1.8401e+07	1.72031e+07	2.27917e+07	1.16716e+07	16931908	1.3046e+07	1.06051	1.08827	1.14767	1.59165	2.57104	1.71718
P28066	Proteasome subunit alpha type-5 OS=Homo sapiens OX=9606 GN=PSMA5 PE=1 SV=3	PSMA5	1.7818	1.8493e-05	Up	44	10	197	10	10	26.4	1.61766e+08	1.47912e+08	1.84026e+08	1.27606e+08	1.07192e+08	1.22448e+08	0.882574	0.885775	0.877219	1.64731	1.54083	1.52574
Q86WV6	Stimulator of interferon genes protein OS=Homo sapiens OX=9606 GN=STING1 PE=1 SV=1	STING1	1.77835	9.62678e-05	Up	9	3	30	3	3	42.2	4.12307e+06	4.15739e+06	5.07515e+06	3.19159e+06	2.91704e+06	3.5448e+06	0.966849	1.07008	1.03981	1.77087	1.80222	1.89843
P06865	Beta-hexosaminidase subunit alpha OS=Homo sapiens OX=9606 GN=HEXA PE=1 SV=2	HEXA	1.77532	0.000975176	Up	28	13	137	12	12	60.7	4.26284e+07	4.64794e+07	5.84379e+07	3.47905e+07	3.43509e+07	36811691	0.574836	0.687958	0.688501	1.11006	1.22042	1.13369
O00571	ATP-dependent RNA helicase DDX3X OS=Homo sapiens OX=9606 GN=DDX3X PE=1 SV=3	DDX3X	1.77247	0.00134986	Up	59	31	363	30	30	73.2	153817733	1.43874e+08	1.53e+08	1.18274e+08	1.03143e+08	1.0416e+08	0.891877	0.915664	0.775096	1.62266	1.57568	1.37931
P24752	Acetyl-CoA acetyltransferase, mitochondrial OS=Homo sapiens OX=9606 GN=ACAT1 PE=1 SV=1	ACAT1	1.77117	0.00702736	Up	36	14	195	14	14	45.2	5.40657e+07	5.60709e+07	6.85851e+07	4.14135e+07	3.34315e+07	5.46579e+07	0.859242	0.978109	0.952333	1.55731	1.39984	1.98386
Q96TA1	Protein Niban 2 OS=Homo sapiens OX=9606 GN=NIBAN2 PE=1 SV=3	NIBAN2	1.77069	0.00138311	Up	49	27	351	27	27	84.1	1.77704e+08	1.69166e+08	2.00123e+08	1.16315e+08	1.28296e+08	1.48787e+08	0.919329	0.960596	0.904554	1.4238	1.7487	1.75794
P62072	Mitochondrial import inner membrane translocase subunit Tim10 OS=Homo sapiens OX=9606 GN=TIMM10 PE=1 SV=1	TIMM10	1.77068	0.00868576	Up	32	3	21	3	3	10.3	1.09745e+07	9.46769e+06	8.96075e+06	7653571	6965954	6.67009e+06	0.87892	0.832273	0.627011	1.45034	1.46985	1.22001
Q15907	Ras-related protein Rab-11B OS=Homo sapiens OX=9606 GN=RAB11B PE=1 SV=4	RAB11B	1.76872	0.000934246	Up	54	12	230	12	12	24.5	1.50749e+08	1.38276e+08	169858403	1.14758e+08	1.10682e+08	102645217	0.929339	0.935666	0.914896	1.67396	1.79773	1.44518
Q16647	Prostacyclin synthase OS=Homo sapiens OX=9606 GN=PTGIS PE=1 SV=1	PTGIS	1.76531	0.0279032	Up	8	4	8	4	4	57.1	1828328	1.52787e+06	1.5267e+06	1.13324e+06	1.36675e+06	989739	0.961868	0.882272	0.701745	1.41066	1.89443	1.18918
Q14108	Lysosome membrane protein 2 OS=Homo sapiens OX=9606 GN=SCARB2 PE=1 SV=2	SCARB2	1.76474	6.02395e-05	Up	34	13	177	13	13	54.3	9.69073e+07	8.08821e+07	1.00075e+08	6.83303e+07	6.07992e+07	7.01117e+07	0.671187	0.614888	0.60559	1.1198	1.10946	1.10903
P38435	Vitamin K-dependent gamma-carboxylase OS=Homo sapiens OX=9606 GN=GGCX PE=1 SV=2	GGCX	1.76445	0.0485103	Up	7	5	50	5	5	87.5	4.54794e+06	8.20405e+06	9.11975e+06	5.73467e+06	4.90802e+06	5.02331e+06	0.567459	1.12358	0.994187	1.69305	1.61345	1.43145
P63244	Receptor of activated protein C kinase 1 OS=Homo sapiens OX=9606 GN=RACK1 PE=1 SV=3	RACK1	1.76352	0.000250593	Up	76	22	597	22	22	35.1	4.17166e+08	4.04236e+08	4.70356e+08	3.0775e+08	2.68757e+08	3.53181e+08	0.903609	0.961087	0.89015	1.57729	1.53377	1.74717
Q9Y291	28S ribosomal protein S33, mitochondrial OS=Homo sapiens OX=9606 GN=MRPS33 PE=1 SV=1	MRPS33	1.7617	0.0108185	Up	27	2	22	2	2	12.6	1.26734e+06	1.28243e+06	1.66271e+06	820183	923251	1.2692e+06	0.924657	1.02702	1.05991	1.41592	1.77474	2.11486
P19404	NADH dehydrogenase [ubiquinone] flavoprotein 2, mitochondrial OS=Homo sapiens OX=9606 GN=NDUFV2 PE=1 SV=2	NDUFV2	1.76026	0.00380881	Up	45	9	105	9	9	27.4	3.00038e+07	2.60612e+07	2.5453e+07	2.0493e+07	1.83239e+07	1.9943e+07	0.995298	0.948912	0.737701	1.60851	1.60148	1.51088
P62191	26S proteasome regulatory subunit 4 OS=Homo sapiens OX=9606 GN=PSMC1 PE=1 SV=1	PSMC1	1.752	0.000517597	Up	56	20	280	19	19	49.2	1.77946e+08	1.70053e+08	2.09112e+08	1.27509e+08	1.14975e+08	1.55112e+08	0.894726	0.93852	0.918643	1.517	1.52311	1.7812
O14976	Cyclin-G-associated kinase OS=Homo sapiens OX=9606 GN=GAK PE=1 SV=2	GAK	1.74885	7.31007e-05	Up	9	10	57	10	10	143.1	7.1051e+06	6.91749e+06	8.30164e+06	5.69957e+06	4.75108e+06	5.42319e+06	0.865077	0.924461	0.883107	1.64198	1.52407	1.50801
Q9UHD2	Serine/threonine-protein kinase TBK1 OS=Homo sapiens OX=9606 GN=TBK1 PE=1 SV=1	TBK1	1.74819	0.00210165	Up	17	9	38	9	9	83.6	5.78723e+06	5.56931e+06	5.39493e+06	4.04308e+06	3.74797e+06	4.20477e+06	0.917814	0.969485	0.74754	1.51718	1.56606	1.52297
Q96HE7	ERO1-like protein alpha OS=Homo sapiens OX=9606 GN=ERO1A PE=1 SV=2	ERO1A	1.74365	0.000132545	Up	67	22	384	21	22	54.4	1.02663e+08	1.00326e+08	1.24508e+08	7.46268e+07	7.09976e+07	8.62886e+07	0.709212	0.760728	0.751491	1.21982	1.29221	1.36138
Q8TCT7	Signal peptide peptidase-like 2B OS=Homo sapiens OX=9606 GN=SPPL2B PE=1 SV=2	SPPL2B	1.73724	0.0177578	Up	5	2	7	2	2	64.6	938477	693462	1.02204e+06	795002	522153	546092	0.948837	0.769567	0.902819	1.90185	1.39089	1.26095
Q9HD20	Endoplasmic reticulum transmembrane helix translocase OS=Homo sapiens OX=9606 GN=ATP13A1 PE=1 SV=2	ATP13A1	1.73611	6.77063e-06	Up	29	27	283	27	27	132.9	6.22006e+07	5.83692e+07	7.27923e+07	4.78716e+07	4.08348e+07	4.76276e+07	0.823093	0.847802	0.841599	1.4989	1.42368	1.43939
Q86X76	Deaminated glutathione amidase OS=Homo sapiens OX=9606 GN=NIT1 PE=1 SV=2	NIT1	1.73464	0.000120986	Up	49	12	62	12	12	35.9	1.58796e+07	1.58839e+07	1.87195e+07	1.27132e+07	1.04854e+07	1.24579e+07	0.869726	0.9549	0.895782	1.64756	1.51306	1.55831
Q86UL3	Glycerol-3-phosphate acyltransferase 4 OS=Homo sapiens OX=9606 GN=GPAT4 PE=1 SV=1	GPAT4	1.73208	0.0333492	Up	17	6	22	6	6	52	2.93419e+06	3.63163e+06	2.67888e+06	1.93044e+06	2.3499e+06	2.31267e+06	0.924527	1.256	0.737479	1.43922	1.95078	1.66422
P61421	V-type proton ATPase subunit d 1 OS=Homo sapiens OX=9606 GN=ATP6V0D1 PE=1 SV=1	ATP6V0D1	1.73017	0.0104369	Up	40	12	137	12	12	40.3	3.32854e+07	3.48705e+07	4.4783e+07	3.17744e+07	2.44397e+07	2.274e+07	0.657595	0.756167	0.773004	1.48533	1.27212	1.02603
Q15334	Lethal(2) giant larvae protein homolog 1 OS=Homo sapiens OX=9606 GN=LLGL1 PE=1 SV=3	LLGL1	1.72989	0.00299913	Up	16	12	61	12	12	115.3	8.63531e+06	8.1964e+06	7.9113e+06	6.21565e+06	5.42987e+06	5.88727e+06	0.832272	0.867094	0.666193	1.41747	1.37881	1.29588
Q5JPE7	Nodal modulator 2 OS=Homo sapiens OX=9606 GN=NOMO2 PE=1 SV=1	NOMO2	1.72807	0.00030452	Up	42	36	485	3	36	139.4	1.30311e+08	1.0553e+08	1.53295e+08	9.10686e+07	8.19642e+07	9.86809e+07	0.849958	0.755522	0.873597	1.40548	1.40854	1.46999
Q9Y3D3	28S ribosomal protein S16, mitochondrial OS=Homo sapiens OX=9606 GN=MRPS16 PE=1 SV=1	MRPS16	1.7251	0.0162762	Up	60	6	50	6	6	15.3	1.02426e+07	1.19603e+07	1.83137e+07	1.05324e+07	8.48107e+06	9.04326e+06	0.693178	0.888445	1.08287	1.68656	1.51221	1.39773
Q9UHG3	Prenylcysteine oxidase 1 OS=Homo sapiens OX=9606 GN=PCYOX1 PE=1 SV=3	PCYOX1	1.72339	0.00198326	Up	38	14	195	14	14	56.6	6.9291e+07	5.19584e+07	8.14586e+07	4.94695e+07	4.04617e+07	5.10991e+07	0.753439	0.62013	0.773879	1.27277	1.15916	1.26897
P61764	Syntaxin-binding protein 1 OS=Homo sapiens OX=9606 GN=STXBP1 PE=1 SV=1	STXBP1	1.7229	0.00502563	Up	24	11	72	11	11	67.5	1.48239e+07	1.20467e+07	1.69849e+07	9.86793e+06	8.18552e+06	1.26865e+07	0.853051	0.760913	0.853966	1.34363	1.24104	1.66732
Q96S52	GPI transamidase component PIG-S OS=Homo sapiens OX=9606 GN=PIGS PE=1 SV=3	PIGS	1.72195	0.00306194	Up	18	7	125	7	7	61.6	25472640	2.01557e+07	2.28972e+07	1.75622e+07	1.33843e+07	1.73341e+07	1.0458	0.908301	0.82134	1.70606	1.44777	1.62533
Q5T7V8	RAB6-interacting golgin OS=Homo sapiens OX=9606 GN=GORAB PE=1 SV=2	GORAB	1.71871	0.00758272	Up	9	2	6	2	2	42.2	249550	202851	249457	181379		158337	0.90189	0.804692	0.787691	1.55104		1.30691
Q13310	Polyadenylate-binding protein 4 OS=Homo sapiens OX=9606 GN=PABPC4 PE=1 SV=1	PABPC4	1.71676	0.000245823	Up	40	27	281	19	19	70.7	9.77007e+07	9.60453e+07	1.26778e+08	7.52729e+07	7.12876e+07	7.57263e+07	0.872185	0.941115	0.988829	1.58997	1.67669	1.54391
Q9UNT1	Rab-like protein 2B OS=Homo sapiens OX=9606 GN=RABL2B PE=1 SV=1	RABL2B	1.71587	0.00570891	Up	11	2	13	2	2	26.1	1.72151e+06	1.55799e+06	2.17435e+06	1.08896e+06	1.34806e+06	1.32214e+06	0.866145	0.860403	0.95582	1.29638	1.78698	1.51923
Q4G176	Malonate--CoA ligase ACSF3, mitochondrial OS=Homo sapiens OX=9606 GN=ACSF3 PE=1 SV=3	ACSF3	1.71295	0.000410174	Up	6	3	8	3	3	64.1	1.36563e+06	1.36869e+06	1.49207e+06	1.06157e+06	876350	1.01802e+06	0.784681	0.863218	0.749055	1.44328	1.32668	1.33592
P30050	60S ribosomal protein L12 OS=Homo sapiens OX=9606 GN=RPL12 PE=1 SV=1	RPL12	1.70957	1.66194e-05	Up	64	8	198	8	8	17.8	241333839	2.29795e+08	2.93697e+08	1.7831e+08	1.60409e+08	1.91753e+08	0.935985	0.978242	0.99521	1.63631	1.63911	1.69847
P82094	TATA element modulatory factor OS=Homo sapiens OX=9606 GN=TMF1 PE=1 SV=2	TMF1	1.70837	0.00190514	Up	23	20	68	20	20	122.8	2.16253e+07	1.8249e+07	2.14531e+07	1.44061e+07	1.17408e+07	1.67106e+07	1.1503	1.06548	0.997021	1.81316	1.64541	2.03005
P62273	40S ribosomal protein S29 OS=Homo sapiens OX=9606 GN=RPS29 PE=1 SV=2	RPS29	1.70773	0.0258407	Up	36	3	60	3	3	6.7	4.94185e+07	2.7108e+07	4.68484e+07	2.97074e+07	2.81543e+07	26550603	1.18335	0.712488	0.980131	1.68318	1.77622	1.45199
P05388	60S acidic ribosomal protein P0 OS=Homo sapiens OX=9606 GN=RPLP0 PE=1 SV=1	RPLP0	1.7039	0.00165408	Up	35	10	218	10	10	34.3	252536870	2.40018e+08	2.79105e+08	1.63156e+08	1.6068e+08	2.12495e+08	0.947286	0.988225	0.914722	1.4481	1.58798	1.82041
P08253	72 kDa type IV collagenase OS=Homo sapiens OX=9606 GN=MMP2 PE=1 SV=2	MMP2	1.7032	8.51131e-05	Up	36	15	122	15	15	73.8	1.07172e+07	1.05077e+07	1.34558e+07	8.22542e+06	7.09058e+06	8.65961e+06	0.337907	0.363648	0.370673	0.613643	0.589015	0.623563
Q9Y2Q3	Glutathione S-transferase kappa 1 OS=Homo sapiens OX=9606 GN=GSTK1 PE=1 SV=3	GSTK1	1.70275	0.000315421	Up	63	11	176	11	11	25.5	5.25084e+07	4.53775e+07	6.44274e+07	3.90581e+07	3.22044e+07	4.0634e+07	0.898373	0.852165	0.963082	1.58118	1.45168	1.58775
Q96BH1	E3 ubiquitin-protein ligase RNF25 OS=Homo sapiens OX=9606 GN=RNF25 PE=1 SV=1	RNF25	1.69821	0.00125052	Up	6	2	7	2	2	51.2	554767	466100	591677	403564	357163	347190	0.566601	0.522518	0.527978	0.975258	0.961082	0.809839
O43592	Exportin-T OS=Homo sapiens OX=9606 GN=XPOT PE=1 SV=2	XPOT	1.69751	0.00353503	Up	30	19	113	19	19	109.9	2.32565e+07	2.14871e+07	2.93507e+07	1.61439e+07	1.40893e+07	2.08967e+07	0.869724	0.882002	0.959003	1.42852	1.38821	1.78476
Q13049	E3 ubiquitin-protein ligase TRIM32 OS=Homo sapiens OX=9606 GN=TRIM32 PE=1 SV=2	TRIM32	1.69712	4.38577e-05	Up	18	8	51	8	8	71.9	5.8229e+06	5.27997e+06	7.03488e+06	4.09935e+06	3.81345e+06	4.55467e+06	0.919068	0.914735	0.970129	1.53096	1.58582	1.64184
Q6PI48	Aspartate--tRNA ligase, mitochondrial OS=Homo sapiens OX=9606 GN=DARS2 PE=1 SV=1	DARS2	1.69164	0.000565292	Up	21	11	111	11	11	73.5	1.74602e+07	1.59509e+07	1.97166e+07	1.14259e+07	10980246	1.41561e+07	0.926789	0.929335	0.914382	1.43503	1.53557	1.71609
Q7Z4V5	Hepatoma-derived growth factor-related protein 2 OS=Homo sapiens OX=9606 GN=HDGFL2 PE=1 SV=1	HDGFL2	1.69005	0.0203495	Up	20	13	75	11	12	74.3	2.53229e+07	2.28183e+07	3.28393e+07	1.92458e+07	2.03704e+07	1.50661e+07	0.931079	0.920898	1.05495	1.67437	1.97334	1.26514
Q9BVG4	Protein PBDC1 OS=Homo sapiens OX=9606 GN=PBDC1 PE=1 SV=1	PBDC1	1.68625	0.000266416	Up	27	7	50	7	7	26	1.18357e+07	1.16155e+07	1.38752e+07	8.36975e+06	8.42166e+06	8716302	0.896867	0.966111	0.918619	1.50067	1.68135	1.50845
Q13454	Tumor suppressor candidate 3 OS=Homo sapiens OX=9606 GN=TUSC3 PE=1 SV=1	TUSC3	1.68171	0.00834088	Up	14	7	79	7	7	39.7	1.52287e+07	1.24853e+07	1.26082e+07	9.48138e+06	9.24983e+06	8.92267e+06	0.912083	0.82078	0.659767	1.34364	1.4596	1.22048
Q9C035	Tripartite motif-containing protein 5 OS=Homo sapiens OX=9606 GN=TRIM5 PE=1 SV=1	TRIM5	1.68108	0.000145238	Up	20	8	32	8	8	56.3	5.75135e+07	5.42361e+07	6.02251e+07	4.00716e+07	3.62397e+07	4.15628e+07	1.03639	1.07275	0.948188	1.70856	1.72054	1.7105
Q9NP92	39S ribosomal protein S30, mitochondrial OS=Homo sapiens OX=9606 GN=MRPS30 PE=1 SV=2	MRPS30	1.67728	0.00334832	Up	10	3	25	3	3	50.3	5.06807e+06	4.83321e+06	5.6e+06	3.21441e+06	3.7487e+06	3.55667e+06	1.06345	1.11318	1.02666	1.59594	2.07245	1.70445
Q9Y287	Integral membrane protein 2B OS=Homo sapiens OX=9606 GN=ITM2B PE=1 SV=1	ITM2B	1.67724	0.000245232	Up	24	5	58	5	5	30.3	6.07571e+06	5.02614e+06	6.87729e+06	4.28844e+06	3.5248e+06	4.41704e+06	0.687192	0.623981	0.679615	1.14768	1.05037	1.14098
O60762	Dolichol-phosphate mannosyltransferase subunit 1 OS=Homo sapiens OX=9606 GN=DPM1 PE=1 SV=1	DPM1	1.67478	0.000260697	Up	41	8	75	8	8	29.6	2.0748e+07	1.93128e+07	2.37182e+07	1.36796e+07	1.33762e+07	1.63527e+07	0.892457	0.911825	0.891368	1.39228	1.51591	1.60644
Q9UL25	Ras-related protein Rab-21 OS=Homo sapiens OX=9606 GN=RAB21 PE=1 SV=3	RAB21	1.67066	0.0120854	Up	29	6	53	6	6	24.3	1.64034e+07	1.43655e+07	1.31416e+07	1.11295e+07	8928794	1.01019e+07	1.02573	0.985997	0.717979	1.64671	1.47102	1.44268
Q86SX6	Glutaredoxin-related protein 5, mitochondrial OS=Homo sapiens OX=9606 GN=GLRX5 PE=1 SV=2	GLRX5	1.67052	0.00349461	Up	29	4	26	4	4	16.6	5.02184e+06	4.52608e+06	4.98078e+06	2.951e+06	3.09475e+06	3.86266e+06	1.05879	1.04742	0.917502	1.47216	1.71909	1.85993
O14874	[3-methyl-2-oxobutanoate dehydrogenase [lipoamide]] kinase, mitochondrial OS=Homo sapiens OX=9606 GN=BCKDK PE=1 SV=2	BCKDK	1.66958	0.0209487	Up	19	4	42	4	4	46.3	2426450	3.41281e+06	2.82166e+06	2.04394e+06	1895922	2.00977e+06	0.66659	1.0291	0.677263	1.32861	1.37226	1.26095
Q13724	Mannosyl-oligosaccharide glucosidase OS=Homo sapiens OX=9606 GN=MOGS PE=1 SV=5	MOGS	1.66947	2.47339e-05	Up	54	28	460	28	28	91.9	1.15314e+08	9.96881e+07	1.30468e+08	7.7879e+07	7.3923e+07	8.16415e+07	0.815114	0.773459	0.805765	1.30256	1.37672	1.31799
P05121	Plasminogen activator inhibitor 1 OS=Homo sapiens OX=9606 GN=SERPINE1 PE=1 SV=1	SERPINE1	1.66707	0.029275	Up	39	13	320	13	13	45	8.91625e+07	5.37218e+07	9.47661e+07	5.67812e+07	4.05165e+07	6.29952e+07	0.896002	0.592561	0.832041	1.35012	1.07272	1.44577
P11441	Ubiquitin-like protein 4A OS=Homo sapiens OX=9606 GN=UBL4A PE=1 SV=1	UBL4A	1.66636	0.00325708	Up	30	5	21	5	5	17.8	1.65178e+07	1.76393e+07	1.83162e+07	1.09204e+07	1.11522e+07	13675553	0.915432	1.07303	0.886901	1.43203	1.6284	1.73095
Q6NSJ5	Volume-regulated anion channel subunit LRRC8E OS=Homo sapiens OX=9606 GN=LRRC8E PE=1 SV=2	LRRC8E	1.66555	0.041557	Up	3	2	5	2	2	90.2	436144	446965	740449		321164	394597	0.663124	0.745924	0.983614		1.28653	1.3702
Q8NBL1	Protein O-glucosyltransferase 1 OS=Homo sapiens OX=9606 GN=POGLUT1 PE=1 SV=1	POGLUT1	1.66519	0.00196583	Up	15	5	47	5	5	46.2	4.03937e+06	4.05695e+06	5.37386e+06	2.7667e+06	2.97366e+06	3.31846e+06	0.737321	0.812827	0.857026	1.19494	1.43009	1.38339
Q9P2R3	Rabankyrin-5 OS=Homo sapiens OX=9606 GN=ANKFY1 PE=1 SV=2	ANKFY1	1.66405	0.00104626	Up	27	21	147	21	21	128.3	2.50085e+07	2.31426e+07	2.93775e+07	1.62233e+07	1.56577e+07	2.05607e+07	0.790771	0.803214	0.811603	1.21379	1.30443	1.48479
Q9BUN8	Derlin-1 OS=Homo sapiens OX=9606 GN=DERL1 PE=1 SV=1	DERL1	1.66215	0.00623934	Up	20	5	56	5	5	28.8	1.59158e+07	1.46065e+07	1.72135e+07	9.8381e+06	9.02218e+06	1.35964e+07	0.853015	0.859275	0.806051	1.24762	1.274	1.66424
P37268	Squalene synthase OS=Homo sapiens OX=9606 GN=FDFT1 PE=1 SV=1	FDFT1	1.6607	0.0164096	Up	28	10	68	10	10	48.1	6.84614e+06	6.39259e+06	1.16476e+07	5.61986e+06	5.30905e+06	5533325	0.770848	0.790051	1.14584	1.49723	1.57495	1.4229
A0FGR8	Extended synaptotagmin-2 OS=Homo sapiens OX=9606 GN=ESYT2 PE=1 SV=1	ESYT2	1.65861	0.0204745	Up	27	18	167	18	18	102.3	3.12876e+07	2.57066e+07	3.51995e+07	1.92177e+07	1.56608e+07	2.75719e+07	0.888568	0.801346	0.873415	1.2914	1.17182	1.78834
Q8N138	ORM1-like protein 3 OS=Homo sapiens OX=9606 GN=ORMDL3 PE=1 SV=1	ORMDL3	1.65574	0.0063432	Up	17	3	14	3	3	17.5	7.13744e+06	7.24499e+06	7.82965e+06	5.8731e+06	4.56585e+06	4.54721e+06	0.960908	1.07061	0.920973	1.87089	1.61953	1.39814
Q03135	Caveolin-1 OS=Homo sapiens OX=9606 GN=CAV1 PE=1 SV=4	CAV1	1.65395	0.000563786	Up	49	8	183	8	8	20.5	2.62512e+08	2.45741e+08	2.90434e+08	1.71966e+08	1.5899e+08	2.07642e+08	1.03218	1.06057	0.997742	1.59989	1.64704	1.86461
Q9H2M9	Rab3 GTPase-activating protein non-catalytic subunit OS=Homo sapiens OX=9606 GN=RAB3GAP2 PE=1 SV=1	RAB3GAP2	1.65098	0.00565443	Up	30	34	206	34	34	155.9	48347462	4.11444e+07	5.86845e+07	3.94258e+07	2.84107e+07	3.10404e+07	0.932077	0.870652	0.988476	1.79845	1.44307	1.36669
Q9Y4K0	Lysyl oxidase homolog 2 OS=Homo sapiens OX=9606 GN=LOXL2 PE=1 SV=1	LOXL2	1.65094	0.00201035	Up	42	24	331	24	24	86.7	7.56068e+07	8.69812e+07	9.69986e+07	5.86543e+07	5.19659e+07	6.4216e+07	0.960289	1.21261	1.07639	1.76271	1.73895	1.86273
Q9UQN3	Charged multivesicular body protein 2b OS=Homo sapiens OX=9606 GN=CHMP2B PE=1 SV=1	CHMP2B	1.64812	0.0226326	Up	9	2	8	2	2	23.9	3.46212e+06	4.45092e+06	3.49256e+06	2.49103e+06	2.47525e+06	2.78979e+06	0.821484	1.15921	0.724046	1.39855	1.5474	1.5118
O43169	Cytochrome b5 type B OS=Homo sapiens OX=9606 GN=CYB5B PE=1 SV=3	CYB5B	1.64667	0.000502869	Up	49	4	83	4	4	16.7	4.13297e+07	3.45175e+07	4.3902e+07	2.59115e+07	2.37422e+07	3.05375e+07	1.01168	0.927415	0.938919	1.50076	1.53118	1.70717
P62841	40S ribosomal protein S15 OS=Homo sapiens OX=9606 GN=RPS15 PE=1 SV=2	RPS15	1.64271	0.00643995	Up	41	5	175	5	5	17	1.93041e+08	1.43862e+08	2.42424e+08	1.2137e+08	1.15963e+08	1.45257e+08	0.989746	0.809612	1.08597	1.4724	1.56647	1.70089
Q8WUD1	Ras-related protein Rab-2B OS=Homo sapiens OX=9606 GN=RAB2B PE=1 SV=1	RAB2B	1.64038	0.0138951	Up	46	9	182	2	2	24.2	2.46441e+06	1.72072e+06	1.88342e+06	1.38238e+06	1.30507e+06	1.37084e+06	1.07531	0.824114	0.718015	1.42722	1.50032	1.36607
P55209	Nucleosome assembly protein 1-like 1 OS=Homo sapiens OX=9606 GN=NAP1L1 PE=1 SV=1	NAP1L1	1.63679	0.00373391	Up	41	9	153	8	8	45.3	8.02404e+07	5.96687e+07	8.85336e+07	5.61211e+07	4.20602e+07	5.32176e+07	1.10616	0.902871	1.06634	1.83059	1.52764	1.67549
P58215	Lysyl oxidase homolog 3 OS=Homo sapiens OX=9606 GN=LOXL3 PE=1 SV=1	LOXL3	1.63584	0.00024455	Up	20	11	57	11	11	83.1	6.43442e+06	5.14033e+06	6.93553e+06	4.11648e+06	3.71989e+06	4.43425e+06	0.843691	0.739812	0.794545	1.27715	1.28508	1.32788
Q9Y3B8	Oligoribonuclease, mitochondrial OS=Homo sapiens OX=9606 GN=REXO2 PE=1 SV=3	REXO2	1.63516	0.000265131	Up	30	7	92	7	7	26.8	4.08238e+07	3.52695e+07	4.35604e+07	2.85367e+07	2.45791e+07	2.62748e+07	1.0001	0.948391	0.932371	1.65416	1.58644	1.47007
Q9BQE5	Apolipoprotein L2 OS=Homo sapiens OX=9606 GN=APOL2 PE=1 SV=1	APOL2	1.63386	0.00304784	Up	28	8	71	8	8	37.1	6.31499e+07	5.94433e+07	5.94102e+07	4.37061e+07	3.71138e+07	4.08933e+07	0.969167	1.00135	0.796621	1.58712	1.50068	1.43332
P63173	60S ribosomal protein L38 OS=Homo sapiens OX=9606 GN=RPL38 PE=1 SV=2	RPL38	1.63319	0.00140436	Up	50	5	105	5	5	8.2	4.29175e+07	3.26881e+07	4.89142e+07	2.67984e+07	2.56595e+07	2.95441e+07	1.10989	0.927879	1.10521	1.63982	1.74832	1.74494
Q9BQ69	ADP-ribose glycohydrolase MACROD1 OS=Homo sapiens OX=9606 GN=MACROD1 PE=1 SV=2	MACROD1	1.63256	0.00306044	Up	18	4	32	4	4	35.5	9.77605e+06	9.53306e+06	1.23275e+07	6.54045e+06	6.0115e+06	8.45607e+06	0.836641	0.895495	0.921752	1.32442	1.35546	1.65276
Q03519	Antigen peptide transporter 2 OS=Homo sapiens OX=9606 GN=TAP2 PE=1 SV=1	TAP2	1.63173	0.00189058	Up	24	12	145	12	12	75.6	4.56279e+07	4.24487e+07	4.76767e+07	2.89369e+07	3.08983e+07	3.00259e+07	0.833106	0.850726	0.760573	1.25015	1.48639	1.25207
Q9P291	Armadillo repeat-containing X-linked protein 1 OS=Homo sapiens OX=9606 GN=ARMCX1 PE=1 SV=1	ARMCX1	1.62743	0.00287276	Up	17	7	17	7	7	49.2	4.87758e+06	3.73435e+06	5.97023e+06	3.23376e+06	3.04846e+06	3.24646e+06	0.760687	0.639251	0.813499	1.1933	1.25259	1.15632
O94979	Protein transport protein Sec31A OS=Homo sapiens OX=9606 GN=SEC31A PE=1 SV=3	SEC31A	1.627	0.000748469	Up	38	36	499	36	36	132.9	3.27804e+08	3.3665e+08	375702397	2.47862e+08	2.12848e+08	2.28277e+08	0.817853	0.921925	0.818973	1.46323	1.39913	1.30073
P00387	NADH-cytochrome b5 reductase 3 OS=Homo sapiens OX=9606 GN=CYB5R3 PE=1 SV=3	CYB5R3	1.62616	2.29336e-05	Up	79	22	461	22	22	34.2	3.73022e+08	3.62587e+08	4.45732e+08	2.71254e+08	2.36693e+08	2.7219e+08	0.895468	0.955397	0.934876	1.54075	1.49703	1.49229
P51571	Translocon-associated protein subunit delta OS=Homo sapiens OX=9606 GN=SSR4 PE=1 SV=1	SSR4	1.62524	0.0390469	Up	38	6	159	6	6	19	2.07326e+08	1.82366e+08	2.40821e+08	1.49595e+08	9.25422e+07	1.77973e+08	0.9225	0.890658	0.936204	1.57496	1.08487	1.80855
P67812	Signal peptidase complex catalytic subunit SEC11A OS=Homo sapiens OX=9606 GN=SEC11A PE=1 SV=1	SEC11A	1.62413	0.000436211	Up	16	3	69	3	3	20.6	2.28789e+07	1.86995e+07	2.4626e+07	1.53852e+07	1.3721e+07	1.43985e+07	0.901796	0.80902	0.848071	1.43489	1.42491	1.29615
O43390	Heterogeneous nuclear ribonucleoprotein R OS=Homo sapiens OX=9606 GN=HNRNPR PE=1 SV=1	HNRNPR	1.62262	0.000489243	Up	40	23	379	17	23	70.9	2.44297e+08	2.17192e+08	2.7525e+08	1.5634e+08	1.62329e+08	1.64565e+08	0.999123	0.974989	0.983542	1.51291	1.74914	1.5371
P61812	Transforming growth factor beta-2 proprotein OS=Homo sapiens OX=9606 GN=TGFB2 PE=1 SV=1	TGFB2	1.61978	0.00386376	Up	4	2	11	2	2	47.7	1.50418e+06	1.14833e+06	1.69246e+06	1.03117e+06	909212	892303	1.20757	1.0119	1.18713	1.95879	1.92313	1.63603
P43307	Translocon-associated protein subunit alpha OS=Homo sapiens OX=9606 GN=SSR1 PE=1 SV=3	SSR1	1.61955	0.00175913	Up	22	4	106	4	4	32.2	7.02596e+07	6.84655e+07	74874670	5.25726e+07	4.27973e+07	4.56664e+07	0.902566	0.965385	0.840375	1.59799	1.4485	1.33979
P08962	CD63 antigen OS=Homo sapiens OX=9606 GN=CD63 PE=1 SV=2	CD63	1.61284	0.00997527	Up	26	6	65	6	6	25.6	24572245	2.33935e+07	2.91335e+07	1.9046e+07	1.25101e+07	1.92974e+07	0.958498	1.00161	0.992894	1.75788	1.28568	1.71914
Q8IVF2	Protein AHNAK2 OS=Homo sapiens OX=9606 GN=AHNAK2 PE=1 SV=2	AHNAK2	1.61248	0.00372481	Up	15	28	178	28	28	616.2	4.00213e+07	3.44757e+07	4.33231e+07	2.41863e+07	2.18011e+07	3.14911e+07	1.17842	1.11424	1.11454	1.68508	1.69128	2.11769
Q96CG8	Collagen triple helix repeat-containing protein 1 OS=Homo sapiens OX=9606 GN=CTHRC1 PE=1 SV=1	CTHRC1	1.61173	6.77444e-05	Up	20	5	75	5	5	26.2	2.82636e+07	2.46419e+07	2.99095e+07	1.79597e+07	1.66387e+07	19673703	0.912375	0.873122	0.843568	1.37179	1.41512	1.45043
Q7Z4R8	UPF0669 protein C6orf120 OS=Homo sapiens OX=9606 GN=C6orf120 PE=1 SV=1	C6orf120	1.60926	1.18619e-05	Up	25	2	44	2	2	20.8	6.22407e+06	5.79673e+06	7.14853e+06	4.37609e+06	3.85734e+06	4.28616e+06	0.975567	0.99729	0.978958	1.62297	1.59294	1.53432
Q7L5N7	Lysophosphatidylcholine acyltransferase 2 OS=Homo sapiens OX=9606 GN=LPCAT2 PE=1 SV=1	LPCAT2	1.60814	0.0190467	Up	34	14	165	14	14	60.2	2.1049e+07	1.92336e+07	3.10196e+07	13974047	1.2945e+07	1.9359e+07	0.779163	0.781469	1.00322	1.22394	1.26249	1.6366
Q9BU23	Lipase maturation factor 2 OS=Homo sapiens OX=9606 GN=LMF2 PE=1 SV=2	LMF2	1.60748	0.0015049	Up	23	13	123	13	13	79.6	3.67358e+07	3.64328e+07	5.02313e+07	2.55131e+07	2.51063e+07	2.94977e+07	0.748735	0.815057	0.894496	1.23039	1.34818	1.37307
Q9BTE7	DCN1-like protein 5 OS=Homo sapiens OX=9606 GN=DCUN1D5 PE=1 SV=1	DCUN1D5	1.60736	0.00017011	Up	11	3	20	3	3	27.5	9.75207e+06	9.92947e+06	1.15634e+07	6.83572e+06	6.22331e+06	7.38312e+06	0.960687	1.07366	0.995257	1.59335	1.61523	1.66108
Q15582	Transforming growth factor-beta-induced protein ig-h3 OS=Homo sapiens OX=9606 GN=TGFBI PE=1 SV=1	TGFBI	1.59957	0.000146211	Up	38	24	390	24	24	74.6	1.55889e+08	1.34419e+08	1.77853e+08	1.01706e+08	9.79761e+07	1.02956e+08	0.783912	0.741937	0.781409	1.21015	1.29808	1.18241
Q92598	Heat shock protein 105 kDa OS=Homo sapiens OX=9606 GN=HSPH1 PE=1 SV=1	HSPH1	1.59945	0.00107983	Up	48	31	290	29	30	96.8	7.25034e+07	6.85479e+07	9.96399e+07	5.24532e+07	4.78665e+07	5.48753e+07	0.917804	0.952448	1.10202	1.5711	1.59643	1.58648
Q9Y314	Nitric oxide synthase-interacting protein OS=Homo sapiens OX=9606 GN=NOSIP PE=1 SV=1	NOSIP	1.59812	0.0133389	Up	18	4	23	4	4	33.2	2.94743e+06	2.86867e+06	2.55148e+06	1.73757e+06	1.78525e+06	1.96605e+06	1.05061	1.12237	0.794613	1.46549	1.67658	1.60051
Q02978	Mitochondrial 2-oxoglutarate/malate carrier protein OS=Homo sapiens OX=9606 GN=SLC25A11 PE=1 SV=3	SLC25A11	1.59615	0.000105009	Up	41	12	168	12	12	34	6.0928e+07	5.94701e+07	7.58083e+07	4.39565e+07	3.95031e+07	4.33809e+07	0.900178	0.964419	0.978573	1.53665	1.53769	1.46378
O94925	Glutaminase kidney isoform, mitochondrial OS=Homo sapiens OX=9606 GN=GLS PE=1 SV=1	GLS	1.59511	0.00026845	Up	43	23	388	23	23	73.4	1.98447e+08	1.7205e+08	2.17713e+08	1.36079e+08	1.1875e+08	1.25379e+08	1.11913	1.065	1.07272	1.81581	1.76441	1.61484
O15173	Membrane-associated progesterone receptor component 2 OS=Homo sapiens OX=9606 GN=PGRMC2 PE=1 SV=1	PGRMC2	1.59424	0.00093061	Up	40	10	182	9	10	23.8	6.46062e+07	6.74003e+07	8.6838e+07	4.77137e+07	4.20701e+07	5.17368e+07	0.761987	0.872551	0.894846	1.33155	1.3073	1.3936
Q3V6T2	Girdin OS=Homo sapiens OX=9606 GN=CCDC88A PE=1 SV=2	CCDC88A	1.59094	0.00914359	Up	3	5	9	5	5	215.9	1.34911e+07	1.52818e+07	1.4591e+07	8.64065e+06	9.09998e+06	1.05134e+07	1.07155	1.33228	1.01255	1.62388	1.90429	1.9071
Q6PGP7	Tetratricopeptide repeat protein 37 OS=Homo sapiens OX=9606 GN=TTC37 PE=1 SV=1	TTC37	1.59057	0.000371847	Up	25	33	226	33	33	175.4	7.3181e+07	6.74043e+07	8.95982e+07	5.39576e+07	4.28338e+07	5.16969e+07	0.909076	0.919063	0.972448	1.58597	1.4019	1.46667
Q08257	Quinone oxidoreductase OS=Homo sapiens OX=9606 GN=CRYZ PE=1 SV=1	CRYZ	1.5902	0.001005	Up	36	8	67	8	8	35.2	2.40387e+07	2.56758e+07	2.77402e+07	1.72875e+07	1.48958e+07	1.8142e+07	0.892806	1.04671	0.90016	1.51921	1.4576	1.53885
P15954	Cytochrome c oxidase subunit 7C, mitochondrial OS=Homo sapiens OX=9606 GN=COX7C PE=1 SV=1	COX7C	1.58927	0.00390324	Up	24	2	20	2	2	7.2	7.99851e+06	8.10389e+06	1.14219e+07	5620797	5.86432e+06	6.11169e+06	0.764839	0.85057	0.954258	1.27174	1.47743	1.33471
P07814	Bifunctional glutamate/proline--tRNA ligase OS=Homo sapiens OX=9606 GN=EPRS1 PE=1 SV=5	EPRS1	1.58918	0.000612434	Up	53	64	801	64	64	170.5	3.11165e+08	2.79854e+08	3.60616e+08	1.96673e+08	1.81076e+08	2.36849e+08	0.956326	0.944067	0.968334	1.43021	1.46624	1.66247
P10620	Microsomal glutathione S-transferase 1 OS=Homo sapiens OX=9606 GN=MGST1 PE=1 SV=1	MGST1	1.58831	4.94801e-05	Up	30	5	102	5	5	17.6	3.52888e+07	3.06948e+07	3.87561e+07	22758003	2.00818e+07	24777287	0.891471	0.851121	0.855413	1.36033	1.3366	1.42952
Q969V3	Nicalin OS=Homo sapiens OX=9606 GN=NCLN PE=1 SV=2	NCLN	1.5873	0.000408145	Up	38	22	292	22	22	62.9	7.76382e+07	7.84265e+07	9.78634e+07	5.5012e+07	4.81261e+07	6.07015e+07	0.849401	0.941793	0.935454	1.42408	1.38722	1.51671
Q9NQE9	Adenosine 5'-monophosphoramidase HINT3 OS=Homo sapiens OX=9606 GN=HINT3 PE=1 SV=1	HINT3	1.58707	0.0237245	Up	38	5	41	5	5	20.3	7.47176e+06	4.79809e+06	6.7733e+06	4.80262e+06	3.25714e+06	4.23124e+06	1.06057	0.74755	0.840004	1.613	1.21809	1.37167
Q96QD8	Sodium-coupled neutral amino acid transporter 2 OS=Homo sapiens OX=9606 GN=SLC38A2 PE=1 SV=2	SLC38A2	1.58544	0.00233179	Up	9	2	38	2	2	56	7874325	7.95702e+06	8.09786e+06	5.53333e+06	4.78322e+06	5.19019e+06	0.812358	0.901033	0.72991	1.35071	1.30012	1.22287
P56378	ATP synthase subunit ATP5MJ, mitochondrial OS=Homo sapiens OX=9606 GN=ATP5MJ PE=1 SV=1	ATP5MJ	1.58287	0.0333128	Up	48	3	68	3	3	6.7	1.86579e+07	1.4252e+07	2.6812e+07	1.48612e+07	1.14787e+07	1.13703e+07	0.838556	0.703074	1.05284	1.58039	1.35922	1.1671
Q13618	Cullin-3 OS=Homo sapiens OX=9606 GN=CUL3 PE=1 SV=2	CUL3	1.57972	0.00212258	Up	26	19	102	18	18	88.9	1.79669e+07	1.4664e+07	2.20114e+07	1.10221e+07	1.07335e+07	1.30617e+07	0.882326	0.790427	0.944425	1.28073	1.38875	1.46494
Q9BTW9	Tubulin-specific chaperone D OS=Homo sapiens OX=9606 GN=TBCD PE=1 SV=2	TBCD	1.57707	0.00319293	Up	24	20	116	20	20	132.5	1.91826e+07	1.48617e+07	1.94487e+07	1.21139e+07	9.40188e+06	1.28479e+07	1.08368	0.921547	0.959947	1.61927	1.39938	1.65764
Q8NF91	Nesprin-1 OS=Homo sapiens OX=9606 GN=SYNE1 PE=1 SV=4	SYNE1	1.57511	0.00028013	Up	8	48	160	48	48	1010.5	2.35039e+07	2.40772e+07	2.74072e+07	1.65743e+07	1.489e+07	1.66026e+07	1.04953	1.18009	1.06926	1.75118	1.75177	1.69315
Q9UHQ9	NADH-cytochrome b5 reductase 1 OS=Homo sapiens OX=9606 GN=CYB5R1 PE=1 SV=1	CYB5R1	1.5747	0.000268785	Up	60	14	161	14	14	34.1	2.37243e+07	2.01471e+07	2.41481e+07	1.49435e+07	1.36531e+07	1.49201e+07	0.820073	0.764412	0.729303	1.22223	1.24342	1.17787
P35475	Alpha-L-iduronidase OS=Homo sapiens OX=9606 GN=IDUA PE=1 SV=2	IDUA	1.57087	0.00999109	Up	27	11	66	11	11	72.6	4.27477e+06	3.45025e+06	5.05536e+06	2.79278e+06	2.8242e+06	2.43166e+06	0.476223	0.421895	0.492056	0.736165	0.828935	0.618678
Q9NRR5	Ubiquilin-4 OS=Homo sapiens OX=9606 GN=UBQLN4 PE=1 SV=2	UBQLN4	1.56991	0.0247302	Up	5	3	15	2	2	63.8	2.09522e+06	1.39862e+06	2.46546e+06	1.10212e+06	1.23871e+06	1.40542e+06	1.13923	0.834713	1.17123	1.41792	1.77451	1.74522
Q8WUM4	Programmed cell death 6-interacting protein OS=Homo sapiens OX=9606 GN=PDCD6IP PE=1 SV=1	PDCD6IP	1.56889	0.00698978	Up	45	39	466	39	39	96	1.55787e+08	142034696	1.72931e+08	1.07175e+08	7.70143e+07	1.18026e+08	0.961334	0.962042	0.932357	1.56486	1.25211	1.66336
Q96PC5	Melanoma inhibitory activity protein 2 OS=Homo sapiens OX=9606 GN=MIA2 PE=1 SV=4	MIA2	1.56295	0.00248621	Up	15	18	130	18	18	159.7	2.23346e+07	2.33932e+07	2.97325e+07	1.49229e+07	1.4905e+07	1.79793e+07	0.877825	1.00919	1.021	1.38779	1.54343	1.61387
Q8N766	ER membrane protein complex subunit 1 OS=Homo sapiens OX=9606 GN=EMC1 PE=1 SV=1	EMC1	1.56228	0.0128725	Up	36	25	250	25	25	111.7	4.10608e+07	3.15024e+07	4.81011e+07	2.28365e+07	2.71136e+07	2.55515e+07	0.923555	0.777741	0.94527	1.21536	1.60676	1.31255
Q9HA77	Probable cysteine--tRNA ligase, mitochondrial OS=Homo sapiens OX=9606 GN=CARS2 PE=1 SV=1	CARS2	1.56064	0.000199912	Up	22	10	80	10	10	62.2	17963309	1.6551e+07	2.10632e+07	1.27986e+07	1.03515e+07	1.20633e+07	0.941948	0.952624	0.965008	1.58797	1.43012	1.44469
O14879	Interferon-induced protein with tetratricopeptide repeats 3 OS=Homo sapiens OX=9606 GN=IFIT3 PE=1 SV=1	IFIT3	1.56014	1.99087e-05	Up	59	20	215	19	20	56	1.13158e+08	1.00432e+08	1.3244e+08	7.27552e+07	6.82932e+07	7.74914e+07	0.800242	0.779584	0.818313	1.21742	1.27245	1.25157
P36222	Chitinase-3-like protein 1 OS=Homo sapiens OX=9606 GN=CHI3L1 PE=1 SV=2	CHI3L1	1.55939	0.0404028	Up	55	17	155	17	17	42.6	5.28494e+06	3.32679e+06	6.49445e+06	3.43643e+06	3.06217e+06	2.88326e+06	0.0797936	0.0551326	0.0856713	0.122766	0.121811	0.0994206
Q4G0F5	Vacuolar protein sorting-associated protein 26B OS=Homo sapiens OX=9606 GN=VPS26B PE=1 SV=2	VPS26B	1.55906	5.85818e-05	Up	23	7	64	6	6	39.1	7.34594e+06	6692585	8.3226e+06	4.66274e+06	4.26589e+06	5.24136e+06	0.883522	0.883527	0.874568	1.32694	1.35178	1.43972
O95197	Reticulon-3 OS=Homo sapiens OX=9606 GN=RTN3 PE=1 SV=2	RTN3	1.55905	0.002869	Up	4	5	78	4	4	112.5	4.36664e+07	4.58341e+07	53860880	3.41875e+07	2.72517e+07	2.94186e+07	0.778372	0.896776	0.838838	1.44194	1.27986	1.19764
Q7L5D6	Golgi to ER traffic protein 4 homolog OS=Homo sapiens OX=9606 GN=GET4 PE=1 SV=1	GET4	1.55838	0.00124132	Up	17	4	16	4	4	36.5	3.5424e+06	2.85876e+06	3.59356e+06	2.07613e+06	1.8629e+06	2.40063e+06	1.05933	0.938361	0.938914	1.46903	1.46776	1.63956
P49327	Fatty acid synthase OS=Homo sapiens OX=9606 GN=FASN PE=1 SV=3	FASN	1.55835	2.40889e-05	Up	46	82	973	81	82	273.3	4.37464e+08	3.80126e+08	4.79409e+08	2.82912e+08	2.44654e+08	2.93654e+08	0.995912	0.949865	0.953564	1.52395	1.46744	1.52679
Q8TED1	Probable glutathione peroxidase 8 OS=Homo sapiens OX=9606 GN=GPX8 PE=1 SV=2	GPX8	1.55671	0.00134214	Up	38	7	90	7	7	23.9	3.78234e+07	3.71256e+07	4.87506e+07	2.7058e+07	2.53673e+07	2.52927e+07	0.742834	0.800314	0.836519	1.25738	1.3126	1.13446
P63098	Calcineurin subunit B type 1 OS=Homo sapiens OX=9606 GN=PPP3R1 PE=1 SV=2	PPP3R1	1.55411	0.00345006	Up	35	6	37	6	6	19.3	2.58124e+07	2.14255e+07	2.7529e+07	1.66414e+07	1.56802e+07	1.4605e+07	0.924752	0.842526	0.861689	1.41067	1.48004	1.19498
P06576	ATP synthase subunit beta, mitochondrial OS=Homo sapiens OX=9606 GN=ATP5F1B PE=1 SV=3	ATP5F1B	1.55263	0.000142918	Up	69	26	1155	26	26	56.5	1.12289e+09	9.72788e+08	1.32638e+09	7.12557e+08	6.83513e+08	7.50372e+08	0.954049	0.907211	0.98462	1.4325	1.53006	1.45605
Q5JPH6	Probable glutamate--tRNA ligase, mitochondrial OS=Homo sapiens OX=9606 GN=EARS2 PE=1 SV=2	EARS2	1.54473	0.00475906	Up	8	2	13	2	2	58.7	1.18043e+06	1.20796e+06	1.36702e+06	717017	715210	935125	0.905397	1.01697	0.916093	1.30128	1.44531	1.63808
P36551	Oxygen-dependent coproporphyrinogen-III oxidase, mitochondrial OS=Homo sapiens OX=9606 GN=CPOX PE=1 SV=3	CPOX	1.54218	0.000392869	Up	46	16	196	16	16	50.1	4.53413e+07	3.71538e+07	5.05759e+07	2.8282e+07	2.64664e+07	2.81602e+07	0.921583	0.828896	0.898151	1.36016	1.41731	1.3072
Q9GZP9	Derlin-2 OS=Homo sapiens OX=9606 GN=DERL2 PE=1 SV=1	DERL2	1.5415	0.0226532	Up	16	2	17	2	2	27.5	8.29151e+06	5.22726e+06	7.22737e+06	4.0324e+06	4.35982e+06	4.52394e+06	1.22153	0.845279	0.930284	1.40564	1.69226	1.52213
Q9NRX2	39S ribosomal protein L17, mitochondrial OS=Homo sapiens OX=9606 GN=MRPL17 PE=1 SV=1	MRPL17	1.54057	0.0423287	Up	32	7	52	7	7	20	1.04098e+07	8.55808e+06	1.09956e+07	5.82234e+06	4.6364e+06	8.45801e+06	1.14354	1.03191	1.05534	1.51338	1.34189	2.12199
Q15067	Peroxisomal acyl-coenzyme A oxidase 1 OS=Homo sapiens OX=9606 GN=ACOX1 PE=1 SV=3	ACOX1	1.54053	0.000758376	Up	29	12	163	12	12	74.4	21086052	2.11191e+07	2.78222e+07	1.44005e+07	1.32639e+07	1.60355e+07	0.805925	0.885995	0.929086	1.30232	1.33567	1.39974
Q86WC4	Osteopetrosis-associated transmembrane protein 1 OS=Homo sapiens OX=9606 GN=OSTM1 PE=1 SV=1	OSTM1	1.53989	0.0144843	Up	5	2	12	2	2	37.2	2.28243e+06	1.92322e+06	2.09996e+06		1.17877e+06	1.43973e+06	0.762435	0.705162	0.612887		1.03744	1.09838
Q9UBB4	Ataxin-10 OS=Homo sapiens OX=9606 GN=ATXN10 PE=1 SV=1	ATXN10	1.53862	0.00625004	Up	36	12	62	12	12	53.5	1.52172e+07	1.57619e+07	2.07272e+07	1.06656e+07	8.93008e+06	1.27558e+07	0.960123	1.09158	1.14261	1.59228	1.48448	1.83808
Q07065	Cytoskeleton-associated protein 4 OS=Homo sapiens OX=9606 GN=CKAP4 PE=1 SV=2	CKAP4	1.53345	0.00234943	Up	69	43	1509	43	43	66	1.94425e+09	1.84539e+09	2.10404e+09	1.18676e+09	1.25424e+09	1.22336e+09	0.84718	0.882608	0.801016	1.22356	1.43989	1.21742
Q9Y5Y5	Peroxisomal membrane protein PEX16 OS=Homo sapiens OX=9606 GN=PEX16 PE=1 SV=2	PEX16	1.53292	0.028746	Up	14	3	15	3	3	38.6	2.41026e+06	2.46182e+06	4.19638e+06	1.91631e+06	1.81491e+06	1.8133e+06	0.769328	0.862502	1.17028	1.44729	1.52627	1.32185
Q9NZ43	Vesicle transport protein USE1 OS=Homo sapiens OX=9606 GN=USE1 PE=1 SV=2	USE1	1.53281	0.0121251	Up	32	8	35	8	8	29.4	6.83277e+06	7.76337e+06	8.08277e+06	4.75961e+06	4.90985e+06	4.44939e+06	0.831336	1.03678	0.859221	1.37023	1.57389	1.23636
O94919	Endonuclease domain-containing 1 protein OS=Homo sapiens OX=9606 GN=ENDOD1 PE=1 SV=2	ENDOD1	1.5292	0.0330818	Up	15	6	54	6	6	55	7.57469e+06	7.87055e+06	1.15176e+07	5223517	6.15832e+06	5.07809e+06	0.831398	0.948211	1.10451	1.35659	1.78088	1.27295
Q15435	Protein phosphatase 1 regulatory subunit 7 OS=Homo sapiens OX=9606 GN=PPP1R7 PE=1 SV=1	PPP1R7	1.52918	0.0178235	Up	41	12	94	12	12	41.5	3.38363e+07	3.29632e+07	3.86138e+07	1.93502e+07	1.8463e+07	2.81239e+07	0.987128	1.05554	0.984232	1.33573	1.41912	1.87383
Q9Y2Q5	Ragulator complex protein LAMTOR2 OS=Homo sapiens OX=9606 GN=LAMTOR2 PE=1 SV=1	LAMTOR2	1.52798	0.00677621	Up	36	4	62	4	4	13.5	1.59913e+07	12421804	1.80567e+07	1.03553e+07	7685995	1.07807e+07	0.863007	0.735818	0.8514	1.32231	1.09284	1.32875
P62829	60S ribosomal protein L23 OS=Homo sapiens OX=9606 GN=RPL23 PE=1 SV=1	RPL23	1.52793	0.000688121	Up	62	7	339	7	7	14.9	1.72698e+08	1.46943e+08	2.11402e+08	1.12656e+08	9.61421e+07	1.19387e+08	0.971888	0.907682	1.03945	1.50011	1.42551	1.53444
Q9UJ14	Glutathione hydrolase 7 OS=Homo sapiens OX=9606 GN=GGT7 PE=1 SV=2	GGT7	1.52513	0.00257663	Up	13	6	50	6	6	70.4	2.93953e+06	2.65418e+06	3.0506e+06	1.63797e+06	1.74695e+06	1.97607e+06	0.765784	0.758952	0.694352	1.00966	1.19905	1.1757
Q9NP72	Ras-related protein Rab-18 OS=Homo sapiens OX=9606 GN=RAB18 PE=1 SV=1	RAB18	1.52452	0.000755852	Up	53	10	128	10	10	23	5.3538e+07	5.05261e+07	5.78221e+07	36637340	3.03427e+07	3.35199e+07	1.06601	1.10426	1.00591	1.72609	1.59177	1.52428
P05387	60S acidic ribosomal protein P2 OS=Homo sapiens OX=9606 GN=RPLP2 PE=1 SV=1	RPLP2	1.52398	0.00368837	Up	70	6	124	6	6	11.7	1.55077e+08	1.6668e+08	1.65933e+08	1.05134e+08	9.10739e+07	1.08317e+08	0.983684	1.16051	0.919613	1.57795	1.52205	1.56918
P07099	Epoxide hydrolase 1 OS=Homo sapiens OX=9606 GN=EPHX1 PE=1 SV=1	EPHX1	1.52258	0.000614592	Up	54	21	293	21	21	52.9	8.71266e+07	7.79272e+07	9.82912e+07	5.10064e+07	5.28229e+07	5.85797e+07	0.775851	0.76168	0.764728	1.07471	1.2393	1.19135
Q9NQC3	Reticulon-4 OS=Homo sapiens OX=9606 GN=RTN4 PE=1 SV=2	RTN4	1.52158	4.38004e-05	Up	17	12	410	12	12	129.9	3.15097e+08	3.0218e+08	3.66823e+08	2.13812e+08	1.82175e+08	2.12757e+08	0.913126	0.961184	0.928768	1.46608	1.39092	1.4081
Q96DZ1	Endoplasmic reticulum lectin 1 OS=Homo sapiens OX=9606 GN=ERLEC1 PE=1 SV=1	ERLEC1	1.52102	0.000449596	Up	40	15	189	15	15	54.8	1.90292e+07	1.87514e+07	2.47691e+07	1.27794e+07	1.19578e+07	1.3759e+07	0.748766	0.809869	0.851531	1.1898	1.23966	1.23645
P46459	Vesicle-fusing ATPase OS=Homo sapiens OX=9606 GN=NSF PE=1 SV=3	NSF	1.52092	3.70375e-05	Up	43	31	443	30	31	82.5	1.2454e+08	1.12396e+08	1.37332e+08	7.85589e+07	6.87404e+07	8.43107e+07	0.897204	0.888768	0.864407	1.33912	1.30473	1.38717
P61020	Ras-related protein Rab-5B OS=Homo sapiens OX=9606 GN=RAB5B PE=1 SV=1	RAB5B	1.52076	0.000618501	Up	42	7	189	4	4	23.7	1.43505e+07	1.22756e+07	1.6758e+07	9.67996e+06	8.11016e+06	8.89249e+06	0.977596	0.91789	0.997421	1.56029	1.45562	1.3835
P13612	Integrin alpha-4 OS=Homo sapiens OX=9606 GN=ITGA4 PE=1 SV=3	ITGA4	1.52007	0.000250625	Up	14	11	91	11	11	114.8	2.7171e+07	2.75042e+07	3.18886e+07	1.78067e+07	1.66513e+07	1.90639e+07	0.786171	0.873507	0.806144	1.21909	1.26937	1.25976
O15347	High mobility group protein B3 OS=Homo sapiens OX=9606 GN=HMGB3 PE=1 SV=4	HMGB3	1.51703	0.0131885	Up	19	3	11	3	3	23	3.95912e+06	4.17773e+06	3.8965e+06	2373019	2.51719e+06	2574724	1.15466	1.33737	0.992872	1.63756	1.93418	1.71494
Q9H4Z3	mRNA (2'-O-methyladenosine-N(6)-)-methyltransferase OS=Homo sapiens OX=9606 GN=PCIF1 PE=1 SV=1	PCIF1	1.51361	0.00117785	Up	5	3	12	3	3	80.6	7.84319e+06	8.10002e+06	1.00367e+07	5775943	4.76746e+06	5.41822e+06	1.02473	1.1616	1.1457	1.78558	1.64108	1.61673
Q8TAE8	Growth arrest and DNA damage-inducible proteins-interacting protein 1 OS=Homo sapiens OX=9606 GN=GADD45GIP1 PE=1 SV=1	GADD45GIP1	1.51158	0.00935319	Up	8	2	9	2	2	25.4	2.21285e+06	2.26268e+06	3088038	1.37386e+06	1.52164e+06	1.71534e+06	0.994524	1.1162	1.21258	1.46099	1.80179	1.76067
O15372	Eukaryotic translation initiation factor 3 subunit H OS=Homo sapiens OX=9606 GN=EIF3H PE=1 SV=1	EIF3H	1.51135	0.000877243	Up	46	16	173	16	16	39.9	5.96032e+07	5.98078e+07	6.93167e+07	3.68776e+07	3.72311e+07	4.18062e+07	0.974209	1.07299	0.989887	1.42622	1.6033	1.56059
P42892	Endothelin-converting enzyme 1 OS=Homo sapiens OX=9606 GN=ECE1 PE=1 SV=2	ECE1	1.51086	0.00481658	Up	17	13	100	13	13	87.1	3.56004e+07	3.63189e+07	4.02136e+07	2.35246e+07	2.33573e+07	2.1849e+07	1.11696	1.25075	1.10235	1.7464	1.93078	1.56559
Q02809	Procollagen-lysine,2-oxoglutarate 5-dioxygenase 1 OS=Homo sapiens OX=9606 GN=PLOD1 PE=1 SV=2	PLOD1	1.51017	6.2498e-05	Up	56	36	660	35	36	83.5	3.00216e+08	2.67768e+08	3.58053e+08	1.93225e+08	1.77598e+08	1.94652e+08	0.778012	0.761668	0.810708	1.18483	1.2126	1.15206
P26038	Moesin OS=Homo sapiens OX=9606 GN=MSN PE=1 SV=3	MSN	1.50958	2.51961e-05	Up	68	46	1252	31	50	67.8	1.03013e+09	9.62064e+08	1.15153e+09	6.42175e+08	6.01604e+08	6.84572e+08	0.936778	0.960293	0.914922	1.38178	1.44139	1.42176
Q6UW68	Transmembrane protein 205 OS=Homo sapiens OX=9606 GN=TMEM205 PE=1 SV=1	TMEM205	1.50259	0.0203457	Up	21	3	47	3	3	21.2	7.74767e+06	7.9028e+06	12162967	5.33994e+06	4.8481e+06	6.6709e+06	0.641148	0.717834	0.87941	1.0456	1.05703	1.26077
O95379	Tumor necrosis factor alpha-induced protein 8 OS=Homo sapiens OX=9606 GN=TNFAIP8 PE=1 SV=1	TNFAIP8	246.496		None	34	5	13	5	5	23	979207	1.64398e+06	124931			104075344	0.0503559	0.0927959	0.0056132			12.2233
Q5VZY2	Phospholipid phosphatase 4 OS=Homo sapiens OX=9606 GN=PLPP4 PE=1 SV=2	PLPP4	50.0054		None	7	2	4	2	2	30.4			47383.7	840498	825024	896810			0.0553115	2.65705	2.90413	2.73645
P00450	Ceruloplasmin OS=Homo sapiens OX=9606 GN=CP PE=1 SV=1	CP	27.3696		None	6	6	35	2	2	122.1	228689			2.56627e+06	2.37257e+06	2.82607e+06	0.0932427			2.47578	2.54868	2.63159
O14929	Histone acetyltransferase type B catalytic subunit OS=Homo sapiens OX=9606 GN=HAT1 PE=1 SV=1	HAT1	15.5561		None	7	2	6	2	2	49.5	1.63099e+06	163505	218559	4.38605e+06			0.597099	0.0657028	0.0699083	3.79936
Q96LZ7	Regulator of microtubule dynamics protein 2 OS=Homo sapiens OX=9606 GN=RMDN2 PE=1 SV=2	RMDN2	11.0931	0.258581	None	8	3	5	3	3	47.4	302269	295092	420576		402940	2.75268e+06	0.359239	0.384948	0.436715		1.26171	7.47155
Q7RTP6	[F-actin]-monooxygenase MICAL3 OS=Homo sapiens OX=9606 GN=MICAL3 PE=1 SV=2	MICAL3	10.4261	0.492911	None	2	4	5	3	3	224.2	2.20141e+06	1.99362e+06	2.63464e+06	1.76388e+06	290076	2.83861e+07	0.463872	0.4611	0.485047	0.879444	0.161041	13.6606
P06681	Complement C2 OS=Homo sapiens OX=9606 GN=C2 PE=1 SV=2	C2	8.70424	0.251974	None	6	4	8	4	4	83.2		5.86771e+06	772766	1.25471e+07	1.20784e+07	1.37464e+07		0.541493	0.0567651	2.49606	2.67551	2.6395
P52292	Importin subunit alpha-1 OS=Homo sapiens OX=9606 GN=KPNA2 PE=1 SV=1	KPNA2	8.20276	0.0645555	None	16	5	41	5	5	57.8	5.98583e+06	5.21297e+06	7.20941e+06	3.14841e+07	2.44834e+07	3.81054e+06	0.570957	0.545784	0.60082	7.10576	6.15288	0.8301
Q9UIA9	Exportin-7 OS=Homo sapiens OX=9606 GN=XPO7 PE=1 SV=3	XPO7	7.62732	0.275177	None	20	19	89	19	19	123.8	1.72737e+07	2.94655e+07	4.19978e+07	5.49788e+06	9.77825e+07	1.69748e+08	0.228478	0.427787	0.485344	0.172066	3.40758	5.12777
Q14168	MAGUK p55 subfamily member 2 OS=Homo sapiens OX=9606 GN=MPP2 PE=1 SV=3	MPP2	7.09074		None	6	3	16	2	2	64.5		87255.9				297356		0.170067				1.2059
P19256	Lymphocyte function-associated antigen 3 OS=Homo sapiens OX=9606 GN=CD58 PE=1 SV=1	CD58	6.61571	0.153085	None	7	2	6	2	2	28.1	626466	155824		237808	1343941	1.66848e+06	0.504677	0.137786		0.453297	2.85249	3.06974
P15559	NAD(P)H dehydrogenase [quinone] 1 OS=Homo sapiens OX=9606 GN=NQO1 PE=1 SV=1	NQO1	5.52241		None	9	2	10	2	2	30.8	2.74641e+06	2.99981e+06	2.82245e+06	6.61675e+06			0.78902	0.94596	0.708457	4.49789
O75113	NEDD4-binding protein 1 OS=Homo sapiens OX=9606 GN=N4BP1 PE=1 SV=4	N4BP1	5.38644		None	6	3	4	3	3	100.3	468338	747785	1.90734e+06			2.32359e+06	0.276042	0.48378	0.982218			3.1278
Q9UII4	E3 ISG15--protein ligase HERC5 OS=Homo sapiens OX=9606 GN=HERC5 PE=1 SV=2	HERC5	5.36147	0.0696114	None	3	2	3	2	2	116.8	52501.7	36178.6	203708		115468	289659	0.284253	0.215	0.963618		1.6471	3.58166
Q07960	Rho GTPase-activating protein 1 OS=Homo sapiens OX=9606 GN=ARHGAP1 PE=1 SV=1	ARHGAP1	5.03801	0.400842	None	64	20	250	20	20	50.4	9.45278e+07	8.37923e+07	1.09443e+08	2.91078e+07	4.68339e+08	5.19021e+07	0.475178	0.462334	0.480674	0.346216	6.20275	0.595862
Q7Z4I7	LIM and senescent cell antigen-like-containing domain protein 2 OS=Homo sapiens OX=9606 GN=LIMS2 PE=1 SV=1	LIMS2	4.92185	0.156843	None	33	9	91	4	4	38.9	1.79946e+06	4.85469e+06	1.5961e+06	3.46248e+06	1.16287e+07	1.36463e+06	0.500747	1.48283	0.388061	2.27983	8.52576	0.867269
O43615	Mitochondrial import inner membrane translocase subunit TIM44 OS=Homo sapiens OX=9606 GN=TIMM44 PE=1 SV=2	TIMM44	4.85608	0.111198	None	32	13	150	13	13	51.3	3.86256e+07	3.28892e+07	5.35314e+07	1.0353e+08	1.5895e+07	1.32738e+08	0.65726	0.614287	0.795857	4.16838	0.712604	5.15849
Q6ZMZ3	Nesprin-3 OS=Homo sapiens OX=9606 GN=SYNE3 PE=1 SV=2	SYNE3	4.79446		None	2	2	4	2	2	112.1	963118	735472	909768			1.79509e+06	0.910539	0.763204	0.751475			3.87587
Q15031	Probable leucine--tRNA ligase, mitochondrial OS=Homo sapiens OX=9606 GN=LARS2 PE=1 SV=2	LARS2	4.42759	0.682494	None	14	11	51	11	11	101.9	1.33504e+07	1.29462e+07	1.53891e+07	3.77234e+06	2.5348e+06	7.26644e+07	0.770896	0.82054	0.776387	0.51541	0.385632	9.5827
Q9UH65	Switch-associated protein 70 OS=Homo sapiens OX=9606 GN=SWAP70 PE=1 SV=1	SWAP70	4.36908	0.0776653	None	38	17	106	17	17	69	4.7485e+07	4.26519e+07	5.62038e+07	1.0986e+08	2.20648e+07	1.35069e+08	0.681767	0.672162	0.705035	3.73216	0.834657	4.42896
Q8TAD7	Overexpressed in colon carcinoma 1 protein OS=Homo sapiens OX=9606 GN=OCC1 PE=1 SV=2	OCC1	4.23564	0.0716324	None	22	2	16	2	2	6.4	1.49425e+06		2.42582e+06	3.13417e+06	3.03687e+06	3.30254e+06	0.469389		0.665783	2.32955	2.5134	2.36931
Q86UA6	RPA-interacting protein OS=Homo sapiens OX=9606 GN=RPAIN PE=1 SV=2	RPAIN	4.07829	0.0569691	None	16	2	2	2	2	24.8	406169	3.18081e+06	2.37401e+06	3104373	3.55257e+06	3349206	0.135224	1.16236	0.69055	2.44547	3.11615	2.54656
P59768	Guanine nucleotide-binding protein G(I)/G(S)/G(O) subunit gamma-2 OS=Homo sapiens OX=9606 GN=GNG2 PE=1 SV=2	GNG2	3.9718	0.0783485	None	48	3	21	3	3	7.8		3.81513e+06	7.21186e+06	8966045	7.19126e+06	9.77593e+06		0.462406	0.695778	2.34261	2.09214	2.46536
Q6NXT6	Transmembrane anterior posterior transformation protein 1 homolog OS=Homo sapiens OX=9606 GN=TAPT1 PE=1 SV=1	TAPT1	3.77092		None	4	2	3	2	2	64.2	516629	316085	520146	700180			0.842014	0.565457	0.74068	2.70017
P29323	Ephrin type-B receptor 2 OS=Homo sapiens OX=9606 GN=EPHB2 PE=1 SV=5	EPHB2	3.61953		None	4	4	16	3	3	117.4		414637		765410	585451	695493		0.528037		2.10124	1.78961	1.84288
P53677	AP-3 complex subunit mu-2 OS=Homo sapiens OX=9606 GN=AP3M2 PE=1 SV=1	AP3M2	3.61284		None	14	5	52	3	3	46.9	733003	358100	883635	966065			0.704734	0.377902	0.742262	2.19769
Q96S06	Lipase maturation factor 1 OS=Homo sapiens OX=9606 GN=LMF1 PE=1 SV=1	LMF1	3.56889	0.220991	None	8	3	11	3	3	64.8		511924	1.05931e+06	2.32111e+06	438146	576328		0.328676	0.541368	3.2125	0.675233	0.769913
Q5JTY5	COBW domain-containing protein 3 OS=Homo sapiens OX=9606 GN=CBWD3 PE=1 SV=1	CBWD3	3.47074	0.32519	None	9	3	7	3	3	44	42428.2	240689		288497	141582	236718	0.136489	0.849877		2.19597	1.2	1.73916
O43861	Probable phospholipid-transporting ATPase IIB OS=Homo sapiens OX=9606 GN=ATP9B PE=2 SV=4	ATP9B	3.35409	0.132386	None	5	5	25	4	5	129.2	2.44509e+06	1.92641e+06	2.42639e+06	888174	3.75682e+06	4.55557e+06	0.660459	0.571155	0.572632	0.567661	2.67361	2.81034
Q3SXM5	Inactive hydroxysteroid dehydrogenase-like protein 1 OS=Homo sapiens OX=9606 GN=HSDL1 PE=1 SV=3	HSDL1	3.26936	0.406804	None	10	3	15	3	3	37	1.2075e+06	1176417	1.27308e+06	647764		2.7751e+06	0.619604	0.662587	0.570751	0.786473		3.25215
O95450	A disintegrin and metalloproteinase with thrombospondin motifs 2 OS=Homo sapiens OX=9606 GN=ADAMTS2 PE=2 SV=2	ADAMTS2	3.19949		None	8	5	11	5	5	134.7	642776		933087			1.02129e+06	0.483576		0.613327			1.75476
Q9NVH2	Integrator complex subunit 7 OS=Homo sapiens OX=9606 GN=INTS7 PE=1 SV=1	INTS7	3.19189	0.0535653	None	2	2	3	2	2	106.8	243024	201533	1302854	848142	590653	679615	0.228384	0.207883	1.06974	1.88593	1.46244	1.45863
Q6GMV3	Putative peptidyl-tRNA hydrolase PTRHD1 OS=Homo sapiens OX=9606 GN=PTRHD1 PE=1 SV=1	PTRHD1	3.17652	0.426141	None	66	7	28	7	7	15.8	5.27624e+06	3718636	3.95004e+06	727673	7.70416e+06	8174204	0.855121	0.661519	0.559331	0.279049	3.2897	3.02561
Q04656	Copper-transporting ATPase 1 OS=Homo sapiens OX=9606 GN=ATP7A PE=1 SV=4	ATP7A	3.16801	0.053446	None	2	2	8	2	2	163.3	222429	536941	135286	411723	478403	311574	0.422832	1.12036	0.224695	1.85192	2.39606	1.3527
O75923	Dysferlin OS=Homo sapiens OX=9606 GN=DYSF PE=1 SV=1	DYSF	3.15112	0.0614045	None	4	5	34	4	4	237.1	564709	413706	685019	1.26237e+06	307766	568579	0.506612	0.407379	0.53693	2.67964	0.727443	1.16495
Q99627	COP9 signalosome complex subunit 8 OS=Homo sapiens OX=9606 GN=COPS8 PE=1 SV=1	COPS8	3.12369	0.140915	None	42	5	40	5	5	23.2	1.34922e+07	7.47484e+06	1.86112e+07	7.69688e+06	3.01846e+07	9.12017e+06	0.83835	0.509802	1.01038	1.13162	4.94147	1.29423
P49795	Regulator of G-protein signaling 19 OS=Homo sapiens OX=9606 GN=RGS19 PE=1 SV=1	RGS19	3.00423	0.0952023	None	26	3	13	3	3	24.6	1.31e+06	1.25511e+06	1.89798e+06	2.51887e+06	598330	2.41688e+06	0.470168	0.494448	0.595168	2.13909	0.565784	1.98109
P48067	Sodium- and chloride-dependent glycine transporter 1 OS=Homo sapiens OX=9606 GN=SLC6A9 PE=1 SV=3	SLC6A9	2.93837	0.211105	None	5	2	4	2	2	78.2	1.78073e+06	2.10492e+06	1.82889e+06	4.9803e+06	878496	1.14628e+06	0.697058	0.904404	0.625497	4.61284	0.906023	1.02478
O15126	Secretory carrier-associated membrane protein 1 OS=Homo sapiens OX=9606 GN=SCAMP1 PE=1 SV=2	SCAMP1	2.87674	0.131243	None	31	6	80	6	6	37.9	1.54939e+07	1.41402e+07	1.51823e+07	9.15071e+06	8.49484e+06	3.64944e+07	0.755133	0.756437	0.646494	1.05526	1.0908	4.06213
Q9UPU7	TBC1 domain family member 2B OS=Homo sapiens OX=9606 GN=TBC1D2B PE=1 SV=2	TBC1D2B	2.86093	0.853311	None	4	4	14	4	4	109.8	1.94419e+06	739567	2.46868e+06	137878	5.0698e+06	162811	0.727323	0.303684	0.806897	0.122046	4.99697	0.139103
Q70IA6	MOB kinase activator 2 OS=Homo sapiens OX=9606 GN=MOB2 PE=1 SV=1	MOB2	2.79708	0.278739	None	8	2	7	2	2	26.9	4.58886e+06	4.16211e+06	4.829e+06	1.63298e+06	9.97632e+06	3.18178e+06	0.843633	0.839882	0.775659	0.710348	4.83222	1.33593
Q7Z4F1	Low-density lipoprotein receptor-related protein 10 OS=Homo sapiens OX=9606 GN=LRP10 PE=1 SV=2	LRP10	2.77962	0.210714	None	10	4	22	4	4	76.1	1.45069e+06	234513	274216	214081	891777	1.11993e+06	0.488453	0.0866706	0.080669	0.170556	0.791103	0.8612
Q99523	Sortilin OS=Homo sapiens OX=9606 GN=SORT1 PE=1 SV=3	SORT1	2.77837		None	3	2	3	2	2	92	397448	567392	487547	566054			0.676695	1.06036	0.725261	2.2804
Q9UKA4	A-kinase anchor protein 11 OS=Homo sapiens OX=9606 GN=AKAP11 PE=1 SV=1	AKAP11	2.76779		None	2	2	7	2	2	210.4	863078	139549	182509			474950	1.96447	0.34864	0.362948			2.46892
Q147X3	N-alpha-acetyltransferase 30 OS=Homo sapiens OX=9606 GN=NAA30 PE=1 SV=1	NAA30	2.73587		None	7	2	3	2	2	39.3	836864	1.20047e+06	1.43706e+06		1.18036e+06		0.541867	0.853189	0.812974		2.01363
P47914	60S ribosomal protein L29 OS=Homo sapiens OX=9606 GN=RPL29 PE=1 SV=2	RPL29	2.72752	0.0570701	None	14	2	13	2	2	17.7	2.24879e+06	3.275e+06	2009534	2.73897e+06	3.98218e+06	1.644e+06	0.671732	1.07378	0.524454	1.93586	3.13397	1.12153
Q9NP73	Putative bifunctional UDP-N-acetylglucosamine transferase and deubiquitinase ALG13 OS=Homo sapiens OX=9606 GN=ALG13 PE=1 SV=2	ALG13	2.63785		None	1	2	6	2	2	126	1453362	1.38812e+06	1.3594e+06			1.60343e+06	0.800257	0.838957	0.653983			2.01637
P10909	Clusterin OS=Homo sapiens OX=9606 GN=CLU PE=1 SV=1	CLU	2.58517	0.356386	None	7	3	9	3	3	52.5	289829		1.54178e+06	878374	648327	1.12134e+06	0.156319		0.726534	1.12096	0.92128	1.38125
P03956	Interstitial collagenase OS=Homo sapiens OX=9606 GN=MMP1 PE=1 SV=3	MMP1	2.5349	0.193641	None	34	13	71	13	13	54	629004	481809	465002	758989	660806	187409	0.0674329	0.0566955	0.043555	0.192528	0.186647	0.0458853
Q96CU9	FAD-dependent oxidoreductase domain-containing protein 1 OS=Homo sapiens OX=9606 GN=FOXRED1 PE=1 SV=2	FOXRED1	2.49461		None	16	4	5	4	4	53.8	748293	582449	1.20404e+06			888245	0.805781	0.688429	1.1328			2.18446
Q9BRR6	ADP-dependent glucokinase OS=Homo sapiens OX=9606 GN=ADPGK PE=1 SV=1	ADPGK	2.4756	0.168933	None	46	14	221	14	14	54.1	5.93158e+07	48132891	8.17221e+07	3.23636e+07	1.09943e+08	3.85986e+07	0.806025	0.71792	0.970248	1.04058	3.93617	1.19788
Q8TCJ2	Dolichyl-diphosphooligosaccharide--protein glycosyltransferase subunit STT3B OS=Homo sapiens OX=9606 GN=STT3B PE=1 SV=1	STT3B	2.43398	0.128621	None	25	18	240	16	16	93.6	6.72246e+07	6.67745e+07	7.46028e+07	9.44229e+07	2.51842e+07	9.23431e+07	0.755836	0.824074	0.732857	2.51199	0.746028	2.3712
Q7Z3C6	Autophagy-related protein 9A OS=Homo sapiens OX=9606 GN=ATG9A PE=1 SV=3	ATG9A	2.41925	0.0854896	None	5	3	14	3	3	94.4	808503	564847	203286	544003	467889	597962	1.15412	0.885029	0.253538	1.83744	1.75971	1.94944
Q6UXH9	Inactive serine protease PAMR1 OS=Homo sapiens OX=9606 GN=PAMR1 PE=1 SV=1	PAMR1	2.39787		None	3	2	11	2	2	80.1	1.49645e+06	1368152	1.73073e+06			1.57851e+06	0.744125	0.746749	0.751932			1.79266
Q5J8M3	ER membrane protein complex subunit 4 OS=Homo sapiens OX=9606 GN=EMC4 PE=1 SV=2	EMC4	2.3853		None	14	2	13	2	2	20.1	2.31807e+06	2.18615e+06	2.68298e+06	2372983			0.849412	0.879278	0.858961	2.05744
Q9Y3E1	Hepatoma-derived growth factor-related protein 3 OS=Homo sapiens OX=9606 GN=HDGFL3 PE=1 SV=1	HDGFL3	2.35483	0.159351	None	25	4	32	2	2	22.6	2.80719e+06	2.87387e+06	3.04305e+06	3.99931e+06	3132198	1.13151e+06	0.743244	0.835182	0.703935	2.50544	2.18492	0.684201
Q9BYB4	Guanine nucleotide-binding protein subunit beta-like protein 1 OS=Homo sapiens OX=9606 GN=GNB1L PE=1 SV=2	GNB1L	2.3168		None	7	2	2	2	2	35.6	254757		1.41802e+06	731269			0.193754		0.942261	1.31596
Q96PD2	Discoidin, CUB and LCCL domain-containing protein 2 OS=Homo sapiens OX=9606 GN=DCBLD2 PE=1 SV=1	DCBLD2	2.28474	0.178429	None	8	4	15	4	4	85	5.05558e+06	1.34936e+06	5.12441e+06	1.5951e+06	4.0475e+06	4.69641e+06	1.2306	0.360522	1.08982	0.918703	2.59574	2.61083
Q92733	Proline-rich protein PRCC OS=Homo sapiens OX=9606 GN=PRCC PE=1 SV=1	PRCC	2.28012	0.607025	None	6	2	10	2	2	52.4	1.4204e+06	1.10886e+06	860848	1.19542e+06	1.71653e+06	165403	1.11283	0.953557	0.58926	2.21604	3.54319	0.295954
Q9BZ67	FERM domain-containing protein 8 OS=Homo sapiens OX=9606 GN=FRMD8 PE=1 SV=1	FRMD8	2.27525	0.0706395	None	5	2	17	2	2	51.2	439930	1.21701e+06	1.64731e+06	1.04166e+06	846859	1.14678e+06	0.259044	0.786572	0.847483	1.45129	1.3138	1.54218
Q8WUJ3	Cell migration-inducing and hyaluronan-binding protein OS=Homo sapiens OX=9606 GN=CEMIP PE=1 SV=2	CEMIP	2.21092	0.105131	None	35	37	240	37	37	152.9	6.37101e+06	6.18805e+06	7.17257e+06	8.79343e+06	5.8121e+06	2.99425e+06	0.14754	0.157293	0.145124	0.481837	0.354619	0.158363
Q9Y3D8	Adenylate kinase isoenzyme 6 OS=Homo sapiens OX=9606 GN=AK6 PE=1 SV=1	AK6	2.20228	0.320808	None	10	2	6	2	2	20	2.09032e+06	1.42126e+06	2.04361e+06	2.2219e+06	441501	2.43044e+06	1.18493	0.884315	1.01214	2.98019	0.659382	3.1465
O94915	Protein furry homolog-like OS=Homo sapiens OX=9606 GN=FRYL PE=1 SV=2	FRYL	2.15054	0.0655153	None	1	3	17	3	3	339.4	1.05037e+06	713039	1.29361e+06	1.18177e+06	904306	522725	1.01222	0.754223	1.08918	2.69467	2.29601	1.15045
Q86YS6	Ras-related protein Rab-43 OS=Homo sapiens OX=9606 GN=RAB43 PE=1 SV=1	RAB43	2.1441	0.20485	None	33	5	56	4	4	23.3	1.41604e+06	1.63596e+06	1.64506e+06	1847654	1.63964e+06	558815	0.809763	1.02686	0.821921	2.50002	2.47035	0.729819
Q9H0V9	VIP36-like protein OS=Homo sapiens OX=9606 GN=LMAN2L PE=1 SV=1	LMAN2L	2.13303	0.0988759	None	37	9	80	9	9	39.7	2.31893e+07	18807397	2.443e+07	3.2545e+07	1.24699e+07	1.27702e+07	0.838122	0.746112	0.771449	2.7832	1.18743	1.0541
P82663	28S ribosomal protein S25, mitochondrial OS=Homo sapiens OX=9606 GN=MRPS25 PE=1 SV=1	MRPS25	2.09456	0.121486	None	45	6	25	6	6	20.1	6.26909e+06	5.9166e+06	7.35716e+06	7.28346e+06	2.39795e+06	7.28851e+06	0.842328	0.872579	0.863678	2.31556	0.848878	2.23656
Q8TB22	Spermatogenesis-associated protein 20 OS=Homo sapiens OX=9606 GN=SPATA20 PE=2 SV=3	SPATA20	2.08511	0.716659	None	9	7	26	7	7	87.8	4.14047e+06	5.08736e+06	5.69961e+06	1.40448e+06	9.17745e+06	1.38244e+06	0.950281	1.28159	1.14291	0.762707	5.54948	0.724626
Q9H9G7	Protein argonaute-3 OS=Homo sapiens OX=9606 GN=AGO3 PE=1 SV=2	AGO3	2.07054		None	15	9	40	4	4	97.3	807120	628871	894931		597084		0.749962	0.641384	0.726533		1.46172
Q8TF42	Ubiquitin-associated and SH3 domain-containing protein B OS=Homo sapiens OX=9606 GN=UBASH3B PE=1 SV=2	UBASH3B	2.05623	0.08045	None	18	6	17	6	6	72.6	4.09516e+06	2.16341e+06	4.55835e+06	4.3218e+06	2.58402e+06	1952245	1.25041	0.725068	1.21606	3.1224	2.07877	1.36139
Q5VW36	Focadhesin OS=Homo sapiens OX=9606 GN=FOCAD PE=1 SV=1	FOCAD	2.04916	0.112707	None	12	18	78	18	18	199.9	1.04389e+07	1.0833e+07	9.82806e+06	5.80811e+06	5.63788e+06	1.52182e+07	0.874347	0.995943	0.719219	1.15108	1.24415	2.91109
Q6IAN0	Dehydrogenase/reductase SDR family member 7B OS=Homo sapiens OX=9606 GN=DHRS7B PE=1 SV=2	DHRS7B	1.9629	0.0857732	None	17	5	19	5	5	35.1	2.19074e+06	809121	885364	855647	1.05063e+06	1.21254e+06	1.29329	0.524292	0.456658	1.1952	1.63411	1.6348
Q96BI1	Solute carrier family 22 member 18 OS=Homo sapiens OX=9606 GN=SLC22A18 PE=1 SV=3	SLC22A18	1.91175	0.123138	None	6	2	15	2	2	44.8	1.46987e+06	1.05999e+06	1.74944e+06	1.49364e+06		775056	0.680528	0.538673	0.707669	1.63626		0.819528
Q14728	Major facilitator superfamily domain-containing protein 10 OS=Homo sapiens OX=9606 GN=MFSD10 PE=1 SV=1	MFSD10	1.88614	0.351328	None	13	4	30	4	4	48.3	3.9367e+06	2.91408e+06	4.14416e+06	3.57554e+06	3.59357e+06	1033041	0.928284	0.754234	0.853788	1.99495	2.23255	0.556328
Q96RN5	Mediator of RNA polymerase II transcription subunit 15 OS=Homo sapiens OX=9606 GN=MED15 PE=1 SV=2	MED15	1.88494		None	4	2	10	2	2	86.7	501320	394473	2.36037e+06	795720			0.399925	0.345411	1.64516	1.50198
O43765	Small glutamine-rich tetratricopeptide repeat-containing protein alpha OS=Homo sapiens OX=9606 GN=SGTA PE=1 SV=1	SGTA	1.8746	0.128443	None	32	8	71	8	8	34	2.26414e+07	1.73676e+07	2.99974e+07	12087219	2.57355e+07	1.35322e+07	0.864235	0.727653	1.00041	1.09168	2.58815	1.17968
P10301	Ras-related protein R-Ras OS=Homo sapiens OX=9606 GN=RRAS PE=1 SV=1	RRAS	1.87231	0.144297	None	71	12	245	10	13	23.5	1.03301e+08	1.61464e+08	4.52385e+07	8.27977e+07	8.16569e+07	8.24005e+07	0.834767	1.43216	0.319398	1.58314	1.73852	1.52074
Q9HCP0	Casein kinase I isoform gamma-1 OS=Homo sapiens OX=9606 GN=CSNK1G1 PE=1 SV=1	CSNK1G1	1.87008	0.556548	None	5	2	4	2	2	48.5	967164	487644	1.05446e+06	1.10315e+06	585545	166202	1.1169	0.618121	1.06392	3.01433	1.78157	0.438344
P51884	Lumican OS=Homo sapiens OX=9606 GN=LUM PE=1 SV=2	LUM	1.84041	0.423387	None	36	10	150	6	10	38.4	7.95733e+07	7.94437e+07	9.86996e+07	9.99985e+07	1.91696e+07	7.81676e+07	0.96217	1.05439	1.04271	2.86101	0.610697	2.15862
Q16739	Ceramide glucosyltransferase OS=Homo sapiens OX=9606 GN=UGCG PE=1 SV=1	UGCG	1.81597	0.691732	None	11	3	16	3	3	44.8	2.11509e+06	2.1158e+06	2.81732e+06	245756	4.34874e+06	214249	0.813511	0.893236	0.946752	0.223656	4.40683	0.1882
Q8IZV5	Retinol dehydrogenase 10 OS=Homo sapiens OX=9606 GN=RDH10 PE=1 SV=1	RDH10	1.79805	0.435849	None	16	3	16	3	3	38.1	603531	592299	1375582	229513	1.00616e+06	534696	0.585993	0.631233	1.16693	0.527281	2.57386	1.18567
O95801	Tetratricopeptide repeat protein 4 OS=Homo sapiens OX=9606 GN=TTC4 PE=1 SV=3	TTC4	1.79599	0.0520713	None	8	3	4	3	3	44.7	1.96398e+06	2.28456e+06	2.24044e+06	1.73439e+06	1.84066e+06	1.13544e+06	0.953517	1.21745	0.950361	1.9924	2.35447	1.25899
Q6NVY1	3-hydroxyisobutyryl-CoA hydrolase, mitochondrial OS=Homo sapiens OX=9606 GN=HIBCH PE=1 SV=2	HIBCH	1.78505	0.214264	None	26	10	80	10	10	43.5	1.74971e+07	1.37661e+07	2.00463e+07	7.71924e+06	1.90946e+07	9.14975e+06	0.90595	0.782361	0.906856	0.945703	2.60482	1.08197
O15121	Sphingolipid delta(4)-desaturase DES1 OS=Homo sapiens OX=9606 GN=DEGS1 PE=1 SV=1	DEGS1	1.76929	0.134102	None	22	4	41	4	4	37.8	3.00832e+06	4.81873e+06	6.77682e+06	3.19447e+06	2.15504e+06	5.21937e+06	0.592792	1.04224	1.16673	1.48942	1.11882	2.34888
Q16394	Exostosin-1 OS=Homo sapiens OX=9606 GN=EXT1 PE=1 SV=2	EXT1	1.7477	0.246987	None	7	3	14	3	3	86.2	1.65573e+06	1.10307e+06	241160	715739	717751	785272	1.59203	1.16418	0.202597	1.62839	1.81829	1.72444
Q96K19	E3 ubiquitin-protein ligase RNF170 OS=Homo sapiens OX=9606 GN=RNF170 PE=1 SV=2	RNF170	1.74006		None	11	2	8	2	2	29.8	396407		396553		245314		0.859216		0.750978		1.40091
Q9UMX1	Suppressor of fused homolog OS=Homo sapiens OX=9606 GN=SUFU PE=1 SV=2	SUFU	1.72661	0.198061	None	13	3	13	3	3	53.9	409226	165390	658383	297225	166492	381502	0.786539	0.348917	1.10561	1.35171	0.843098	1.67463
Q8IVS2	Malonyl-CoA-acyl carrier protein transacylase, mitochondrial OS=Homo sapiens OX=9606 GN=MCAT PE=1 SV=2	MCAT	1.72508	0.078374	None	5	2	9	2	2	42.9	614050	1.22956e+06	1.41332e+06	804824	626607	859263	0.589683	1.29605	1.18583	1.82876	1.5854	1.88454
Q6NUM9	All-trans-retinol 13,14-reductase OS=Homo sapiens OX=9606 GN=RETSAT PE=1 SV=2	RETSAT	1.72362	0.0686779	None	11	6	39	6	6	66.8	3.02741e+06	3.42887e+06	3.78805e+06	1.94036e+06	3.12781e+06	2.00441e+06	0.801253	0.996106	0.875951	1.21513	2.18106	1.21157
Q9BUT1	3-hydroxybutyrate dehydrogenase type 2 OS=Homo sapiens OX=9606 GN=BDH2 PE=1 SV=2	BDH2	1.70959	0.126954	None	25	5	14	5	5	26.7	2.48474e+06	2.27437e+06	7.59428e+06	2.5919e+06	2.91087e+06	2.65218e+06	0.404933	0.406835	1.08132	0.999451	1.24983	0.987119
Q8WV24	Pleckstrin homology-like domain family A member 1 OS=Homo sapiens OX=9606 GN=PHLDA1 PE=1 SV=4	PHLDA1	1.70776	0.119915	None	4	2	10	2	2	45	1.51522e+06	1.2719e+06	1.19933e+06	664059	1.25648e+06	823004	1.24829	1.15014	0.863263	1.29446	2.72723	1.54848
P37840	Alpha-synuclein OS=Homo sapiens OX=9606 GN=SNCA PE=1 SV=1	SNCA	1.70771	0.254927	None	25	3	8	3	3	14.5	1.13929e+06	297236	2.80329e+06	727136	1.11107e+06	892150	0.558102	0.159822	1.19981	0.842825	1.434	0.998122
Q13685	Angio-associated migratory cell protein OS=Homo sapiens OX=9606 GN=AAMP PE=1 SV=2	AAMP	1.68708	0.080384	None	9	3	11	3	3	46.7	1.32204e+06	1.13766e+06	3111122	1.18868e+06	1.11721e+06	1.38663e+06	0.710921	0.671499	1.4617	1.51246	1.58285	1.70295
Q9NX63	MICOS complex subunit MIC19 OS=Homo sapiens OX=9606 GN=CHCHD3 PE=1 SV=1	CHCHD3	1.67105	0.131559	None	49	10	86	10	10	26.1	4.13151e+07	4.51175e+07	6.7629e+07	4.20194e+07	3.82634e+07	2.20229e+07	0.800617	0.959659	1.14502	1.92667	1.95356	0.974666
Q5T4B2	Inactive glycosyltransferase 25 family member 3 OS=Homo sapiens OX=9606 GN=CERCAM PE=1 SV=1	CERCAM	1.66866	0.29193	None	36	18	109	18	18	67.5	3.27566e+07	2.73987e+07	4.04862e+07	15964611	1.24803e+07	4.08138e+07	0.615768	0.565332	0.664951	0.710096	0.618115	1.75222
Q9BVP2	Guanine nucleotide-binding protein-like 3 OS=Homo sapiens OX=9606 GN=GNL3 PE=1 SV=2	GNL3	1.66603	0.120818	None	27	15	99	15	15	62	2.81604e+07	2.60154e+07	2.6774e+07	1.13484e+07	2.04151e+07	2.31294e+07	1.12118	1.13691	0.931356	1.06908	2.14149	2.10314
A5PLL7	Plasmanylethanolamine desaturase OS=Homo sapiens OX=9606 GN=PEDS1 PE=1 SV=3	PEDS1	1.65988	0.131407	None	22	4	26	4	4	31.1	1.47776e+06	1.67056e+06	3.16632e+06	1.20893e+06	1.78966e+06	1.10028e+06	0.513821	0.637566	0.961893	0.994598	1.63948	0.873722
O43150	Arf-GAP with SH3 domain, ANK repeat and PH domain-containing protein 2 OS=Homo sapiens OX=9606 GN=ASAP2 PE=1 SV=3	ASAP2	1.65353	0.201369	None	4	3	8	3	3	111.6	4.93838e+06	4.11236e+06	3.63899e+06	1.62828e+06	3.44896e+06	3.4797e+06	1.0096	0.922809	0.649996	0.787655	1.85773	1.62469
Q6DKK2	Tetratricopeptide repeat protein 19, mitochondrial OS=Homo sapiens OX=9606 GN=TTC19 PE=1 SV=4	TTC19	1.64933	0.207193	None	15	3	13	3	3	42.4	406244	360523	488164		213548	345096	0.959314	0.934465	1.00718		1.32861	1.86114
Q9NRZ7	1-acyl-sn-glycerol-3-phosphate acyltransferase gamma OS=Homo sapiens OX=9606 GN=AGPAT3 PE=1 SV=1	AGPAT3	1.64388	0.642456	None	15	5	22	5	5	43.4	2.77922e+06	2.0319e+06	3.28871e+06	3.18497e+06	1.57866e+06	553064	0.738485	0.59262	0.7635	2.00246	1.10519	0.335628
P49069	Guided entry of tail-anchored proteins factor CAMLG OS=Homo sapiens OX=9606 GN=CAMLG PE=1 SV=1	CAMLG	1.64386	0.303163	None	17	3	12	3	3	32.9	401691	3.69798e+06	4.47438e+06	1.98102e+06	1.83341e+06	1.85707e+06	0.106612	1.0773	1.03756	1.24407	1.28205	1.12566
Q8IVH4	Methylmalonic aciduria type A protein, mitochondrial OS=Homo sapiens OX=9606 GN=MMAA PE=1 SV=1	MMAA	1.64116	0.0515875	None	6	2	8	2	2	46.5	1.02963e+06	791998	817783	537710	602387		1.05564	0.891282	0.732551	1.30444	1.62719
Q13043	Serine/threonine-protein kinase 4 OS=Homo sapiens OX=9606 GN=STK4 PE=1 SV=2	STK4	1.63886	0.992246	None	8	3	8	2	3	55.6	1.38033e+06	587904	820749	1.155e+06	100099		1.2759	0.596482	0.662843	2.52615	0.243776
Q8IWU5	Extracellular sulfatase Sulf-2 OS=Homo sapiens OX=9606 GN=SULF2 PE=1 SV=1	SULF2	1.62629		None	6	3	7	3	3	100.4	277726	251386	591604			254106	0.484078	0.480946	0.900938			1.01153
Q9BPZ7	Target of rapamycin complex 2 subunit MAPKAP1 OS=Homo sapiens OX=9606 GN=MAPKAP1 PE=1 SV=2	MAPKAP1	1.62509	0.277306	None	4	2	4	2	2	59.1	529690	413914	317274	221978	416365	187129	0.945062	0.810597	0.494582	0.937107	1.95722	0.762508
Q9NXH8	Torsin-4A OS=Homo sapiens OX=9606 GN=TOR4A PE=1 SV=2	TOR4A	1.62135	0.103647	None	8	3	18	3	3	46.9	1.51891e+06	2.02537e+06	3.83692e+06	1.32935e+06	1.68931e+06	1.71036e+06	0.528207	0.773094	1.16579	1.09384	1.54778	1.3584
Q969E2	Secretory carrier-associated membrane protein 4 OS=Homo sapiens OX=9606 GN=SCAMP4 PE=1 SV=1	SCAMP4	1.60778	0.0721082	None	16	2	19	2	2	25.7	6.94917e+06	7.90903e+06	10854718	4.75191e+06	4.17498e+06	7.94045e+06	0.794029	0.991933	1.08364	1.28473	1.25686	2.07211
Q8N4V1	ER membrane protein complex subunit 5 OS=Homo sapiens OX=9606 GN=MMGT1 PE=1 SV=1	MMGT1	1.59034	0.167131	None	34	3	17	3	3	14.7	6.41223e+06	6.7517e+06	3.51791e+06	2.86822e+06	4.07642e+06	4.09173e+06	1.09101	1.26093	0.522963	1.15471	1.82737	1.58999
O14735	CDP-diacylglycerol--inositol 3-phosphatidyltransferase OS=Homo sapiens OX=9606 GN=CDIPT PE=1 SV=1	CDIPT	1.5618	0.0542421	None	21	4	71	4	4	23.5	9.85236e+06	7.59974e+06	1.17228e+07	4.68649e+06	6.95554e+06	6.56668e+06	0.828322	0.701315	0.861103	0.932281	1.5407	1.26087
Q96E22	Dehydrodolichyl diphosphate synthase complex subunit NUS1 OS=Homo sapiens OX=9606 GN=NUS1 PE=1 SV=1	NUS1	1.55986	0.120937	None	8	2	5	2	2	33.2	1.02646e+06	605534	1.22114e+06	536272	606983		1.02752	0.665337	1.06802	1.2702	1.60085
Q9UJX6	Anaphase-promoting complex subunit 2 OS=Homo sapiens OX=9606 GN=ANAPC2 PE=1 SV=1	ANAPC2	1.55763	0.76911	None	3	2	5	2	2	93.8	706825	601144	738895	194265	184020	958833	1.00699	0.940046	0.919734	0.654861	0.690727	3.11977
Q9NQY0	Bridging integrator 3 OS=Homo sapiens OX=9606 GN=BIN3 PE=1 SV=1	BIN3	1.55358	0.102658	None	16	3	9	3	3	29.6	2.99139e+07	1.61055e+07	4.46306e+07	1.83344e+07	1.71867e+07	2.0078e+07	1.03069	0.609095	1.34354	1.49472	1.56018	1.57993
Q5T5C0	Syntaxin-binding protein 5 OS=Homo sapiens OX=9606 GN=STXBP5 PE=1 SV=1	STXBP5	1.55241	0.197958	None	13	10	47	10	10	127.5	5.85891e+06	4.65603e+06	2.02143e+07	6.35388e+06	5.57073e+06	6.45213e+06	0.393576	0.343307	1.18641	1.00993	0.985942	0.989874
P98155	Very low-density lipoprotein receptor OS=Homo sapiens OX=9606 GN=VLDLR PE=1 SV=1	VLDLR	1.55129	0.11244	None	3	2	11	2	2	96	395779	186613	460938	186843	206191	250071	1.12711	0.583329	1.14689	1.25902	1.54708	1.62646
Q92504	Zinc transporter SLC39A7 OS=Homo sapiens OX=9606 GN=SLC39A7 PE=1 SV=2	SLC39A7	1.53685	0.318149	None	3	2	25	2	2	50.1	4.3209e+06	9.15351e+06	5.07112e+06	4.99689e+06	4.50427e+06	2.27691e+06	0.657778	1.5295	0.674488	1.79989	1.80658	0.791618
O75122	CLIP-associating protein 2 OS=Homo sapiens OX=9606 GN=CLASP2 PE=1 SV=3	CLASP2	1.53504	0.94453	None	7	8	24	7	7	141	855204	1.367e+06	384115	183180	1.26748e+06	156909	1.04296	1.82987	0.409282	0.528585	4.07254	0.437028
Q9UI42	Carboxypeptidase A4 OS=Homo sapiens OX=9606 GN=CPA4 PE=1 SV=2	CPA4	1.53202	0.0674418	None	33	10	62	10	10	47.3	1.36104e+07	2.13535e+07	1.54007e+07	10489178	9.63361e+06	1.18982e+07	1.00621	1.73278	0.994771	1.83485	1.87644	2.00892
Q08629	Testican-1 OS=Homo sapiens OX=9606 GN=SPOCK1 PE=1 SV=1	SPOCK1	1.53014	0.198554	None	10	3	10	3	3	49.1	972719	798657	1.00412e+06	345841	606250	769139	0.831935	0.749752	0.750332	0.699872	1.3661	1.50235
Q8NB46	Serine/threonine-protein phosphatase 6 regulatory ankyrin repeat subunit C OS=Homo sapiens OX=9606 GN=ANKRD52 PE=1 SV=3	ANKRD52	1.52683	0.326548	None	3	2	4	2	2	115	447510	514828	392842	191351		406034	0.877787	1.10842	0.67324	0.888091		1.81892
Q9Y6R1	Electrogenic sodium bicarbonate cotransporter 1 OS=Homo sapiens OX=9606 GN=SLC4A4 PE=1 SV=1	SLC4A4	1.5194	0.0660466	None	3	2	6	2	2	121.4	1.78509e+06	2.61952e+06	2.03075e+06	1.25653e+06	1.16396e+06	1.63627e+06	0.725655	1.16882	0.72126	1.2086	1.24663	1.51911
O94911	ABC-type organic anion transporter ABCA8 OS=Homo sapiens OX=9606 GN=ABCA8 PE=1 SV=4	ABCA8	1.5155	0.527739	None	4	5	10	5	5	183.6	355525	429593		121440	327053	320111	0.359243	0.476465		0.29035	0.870691	0.738727
Q5MNZ9	WD repeat domain phosphoinositide-interacting protein 1 OS=Homo sapiens OX=9606 GN=WIPI1 PE=1 SV=3	WIPI1	1.51543	0.193065	None	22	5	27	5	5	48.6	2.79462e+06	1.57079e+06	1.3533e+06	1165585	1.40068e+06	959539	1.04275	0.643328	0.441182	1.02907	1.37697	0.817685
P43378	Tyrosine-protein phosphatase non-receptor type 9 OS=Homo sapiens OX=9606 GN=PTPN9 PE=1 SV=1	PTPN9	1.50854	0.121417	None	16	6	22	6	6	68	2.69154e+06	4.93509e+06	3.33038e+06	2.12573e+06	2.41919e+06	2.28468e+06	0.772047	1.5538	0.834645	1.44276	1.82827	1.4967
P47985	Cytochrome b-c1 complex subunit Rieske, mitochondrial OS=Homo sapiens OX=9606 GN=UQCRFS1 PE=1 SV=2	UQCRFS1	1.49933	0.0961534	None	58	13	226	13	13	29.6	8.31276e+07	7.40532e+07	9.68585e+07	3.62473e+07	5.24385e+07	6.54437e+07	1.00092	0.978709	1.01896	1.03269	1.66353	1.79964
P38606	V-type proton ATPase catalytic subunit A OS=Homo sapiens OX=9606 GN=ATP6V1A PE=1 SV=2	ATP6V1A	1.49889	0.000713563	None	55	25	366	25	25	68.3	8.8391e+07	8.36658e+07	1.05023e+08	5.46135e+07	4.98254e+07	6.44431e+07	0.700027	0.727294	0.7267	1.0234	1.03964	1.1656
Q9Y6K5	2'-5'-oligoadenylate synthase 3 OS=Homo sapiens OX=9606 GN=OAS3 PE=1 SV=3	OAS3	1.49761	0.000823234	None	21	21	139	21	21	121.1	4.86498e+07	4.83193e+07	6.09649e+07	3.46278e+07	2.92758e+07	3.19598e+07	0.908938	0.990899	0.995171	1.5308	1.44109	1.36371
O75381	Peroxisomal membrane protein PEX14 OS=Homo sapiens OX=9606 GN=PEX14 PE=1 SV=1	PEX14	1.49579	0.00367033	None	20	4	27	4	4	41.2	9.60182e+06	7.51954e+06	8764691	5.39544e+06	4.86842e+06	5.50362e+06	1.10101	0.946426	0.878094	1.46389	1.47081	1.4413
Q9BT40	Inositol polyphosphate 5-phosphatase K OS=Homo sapiens OX=9606 GN=INPP5K PE=1 SV=3	INPP5K	1.49453	0.0323732	None	5	2	23	2	2	51.1	1.95181e+06	1.52368e+06	2.15557e+06	915330	1.1674e+06	1.30908e+06	0.976916	0.837084	0.942644	1.08402	1.53946	1.49641
P61587	Rho-related GTP-binding protein RhoE OS=Homo sapiens OX=9606 GN=RND3 PE=1 SV=1	RND3	1.49389	0.0157519	None	30	7	69	7	7	27.4	7.64975e+06	7.32011e+06	8.84588e+06	4.93056e+06	3.69397e+06	5.94528e+06	0.895467	0.940537	0.904708	1.36565	1.13926	1.58942
P61457	Pterin-4-alpha-carbinolamine dehydratase OS=Homo sapiens OX=9606 GN=PCBD1 PE=1 SV=2	PCBD1	1.49375	0.115893	None	16	2	12	2	2	12	2.32375e+06	2.71579e+06	2304649	1.36917e+06	1.83097e+06	1.25579e+06	0.896351	1.14985	0.77671	1.24965	1.86079	1.10629
Q9UBF6	RING-box protein 2 OS=Homo sapiens OX=9606 GN=RNF7 PE=1 SV=1	RNF7	1.4935	0.0380536	None	30	2	13	2	2	12.7	1.06256e+06	986750	1.45877e+06	564821	711551	830572	0.810773	0.826436	0.972519	1.01976	1.43047	1.4474
Q13438	Protein OS-9 OS=Homo sapiens OX=9606 GN=OS9 PE=1 SV=1	OS9	1.49333	0.0101786	None	10	5	40	5	5	75.5	3.98808e+06	3.604e+06	3.508e+06	2.26269e+06	2.03832e+06	2.5027e+06	0.650026	0.644774	0.499565	0.872637	0.87532	0.931623
P54259	Atrophin-1 OS=Homo sapiens OX=9606 GN=ATN1 PE=1 SV=3	ATN1	1.49065	0.297854	None	4	2	7	2	2	125.3	678660	409570	1.04107e+06	321637	479780		1.15706	0.76646	1.55078	1.29751	2.15514
O75298	Reticulon-2 OS=Homo sapiens OX=9606 GN=RTN2 PE=1 SV=1	RTN2	1.49043	0.0622573	None	6	3	30	3	3	59.2	1.87098e+06	1.67303e+06	1.89527e+06	966141	849209	1.51944e+06	0.550017	0.539842	0.486791	0.672029	0.657732	1.02013
Q6PIU2	Neutral cholesterol ester hydrolase 1 OS=Homo sapiens OX=9606 GN=NCEH1 PE=1 SV=3	NCEH1	1.4897	0.00040736	None	38	13	190	13	13	45.8	4.66439e+07	4.18266e+07	5.69639e+07	3.09218e+07	2.54137e+07	3.14812e+07	0.959371	0.944278	1.02366	1.50486	1.37717	1.4788
Q14118	Dystroglycan 1 OS=Homo sapiens OX=9606 GN=DAG1 PE=1 SV=2	DAG1	1.48758	0.0189802	None	4	3	17	3	3	97.4	7.2781e+06	7.50198e+06	1.13074e+07	4.92698e+06	4.58234e+06	6.14819e+06	0.697702	0.789375	0.947063	1.11757	1.15736	1.34606
O00469	Procollagen-lysine,2-oxoglutarate 5-dioxygenase 2 OS=Homo sapiens OX=9606 GN=PLOD2 PE=1 SV=2	PLOD2	1.48652	0.000142602	None	49	32	820	32	32	84.6	5.40367e+08	5.23486e+08	6.21037e+08	3.57809e+08	3.00424e+08	3.61605e+08	0.938722	0.998178	0.942605	1.47075	1.37502	1.43465
P60953	Cell division control protein 42 homolog OS=Homo sapiens OX=9606 GN=CDC42 PE=1 SV=2	CDC42	1.48469	0.00187137	None	63	10	185	9	10	21.2	1.25799e+08	1.10937e+08	1.23229e+08	7.2306e+07	7.03181e+07	7.48987e+07	1.04861	1.01501	0.897466	1.42612	1.54431	1.42587
P54619	5'-AMP-activated protein kinase subunit gamma-1 OS=Homo sapiens OX=9606 GN=PRKAG1 PE=1 SV=1	PRKAG1	1.4835	0.00041793	None	33	10	83	9	9	37.6	1.2284e+07	1.12145e+07	1.36994e+07	8.04352e+06	6.40905e+06	8.0229e+06	0.877873	0.879685	0.855373	1.36012	1.20673	1.30944
Q96KP1	Exocyst complex component 2 OS=Homo sapiens OX=9606 GN=EXOC2 PE=1 SV=1	EXOC2	1.48345	4.82747e-05	None	23	18	105	18	18	104	1.52988e+07	1.39895e+07	1.82809e+07	9.45828e+06	8.78508e+06	1.03519e+07	0.87203	0.875249	0.910408	1.27564	1.31931	1.34759
O00264	Membrane-associated progesterone receptor component 1 OS=Homo sapiens OX=9606 GN=PGRMC1 PE=1 SV=3	PGRMC1	1.48315	7.98372e-06	None	47	8	146	7	7	21.7	5.28881e+07	47546415	6.08852e+07	3.30359e+07	29088954	3.5e+07	0.935291	0.922915	0.94073	1.38234	1.35533	1.41358
Q13428	Treacle protein OS=Homo sapiens OX=9606 GN=TCOF1 PE=1 SV=3	TCOF1	1.4829	0.0167962	None	16	19	77	19	19	152	2.17961e+07	1.41121e+07	2.01383e+07	1.10015e+07	1.06711e+07	1.19258e+07	1.34798	0.957975	1.08816	1.6099	1.73877	1.68445
Q9Y394	Dehydrogenase/reductase SDR family member 7 OS=Homo sapiens OX=9606 GN=DHRS7 PE=1 SV=1	DHRS7	1.4806	0.0132927	None	22	7	105	7	7	38.3	2.84807e+07	2.84174e+07	3.07328e+07	1.8442e+07	1.38426e+07	2.10172e+07	0.815542	0.893175	0.768888	1.24953	1.04434	1.37447
P61803	Dolichyl-diphosphooligosaccharide--protein glycosyltransferase subunit DAD1 OS=Homo sapiens OX=9606 GN=DAD1 PE=1 SV=3	DAD1	1.47963	0.014155	None	26	3	41	3	3	12.5	2.4827e+07	2.43714e+07	3.23774e+07	16857337	17008569	1.46565e+07	0.758347	0.817109	0.864074	1.21835	1.3688	1.02244
Q9UJX2	Cell division cycle protein 23 homolog OS=Homo sapiens OX=9606 GN=CDC23 PE=1 SV=3	CDC23	1.47938	0.0532739	None	9	5	18	5	5	68.8	2.34202e+06	2.20503e+06	2.65698e+06	1.1057e+06	1.54551e+06	1.66009e+06	0.987136	1.02013	0.978449	1.10272	1.71626	1.59802
Q15233	Non-POU domain-containing octamer-binding protein OS=Homo sapiens OX=9606 GN=NONO PE=1 SV=4	NONO	1.47822	0.00444119	None	37	19	185	18	18	54.2	2.13528e+08	1.80802e+08	216173070	1.28524e+08	1.00315e+08	1.40023e+08	1.08939	1.01249	0.963598	1.55152	1.34842	1.63152
Q9UMX5	Neudesin OS=Homo sapiens OX=9606 GN=NENF PE=1 SV=1	NENF	1.47816	0.00340243	None	49	6	91	6	6	18.8	1.52473e+07	1.18697e+07	1.80376e+07	9.48659e+06	8.31936e+06	9.07497e+06	0.945185	0.807641	0.976939	1.39147	1.35875	1.28479
Q9Y679	Lipid droplet-regulating VLDL assembly factor AUP1 OS=Homo sapiens OX=9606 GN=AUP1 PE=1 SV=2	AUP1	1.47759	0.0305916	None	13	3	23	3	3	45.8	1.00442e+06	739994	1.05729e+06	603857	577604	481032	0.799916	0.646867	0.735678	1.1379	1.21196	0.874922
Q9HCU5	Prolactin regulatory element-binding protein OS=Homo sapiens OX=9606 GN=PREB PE=1 SV=2	PREB	1.47491	0.0015802	None	32	10	86	10	10	45.4	1.11586e+07	1.11858e+07	1.50188e+07	7.33685e+06	7.06254e+06	7.86085e+06	0.806416	0.887306	0.948311	1.25459	1.34474	1.29743
P48426	Phosphatidylinositol 5-phosphate 4-kinase type-2 alpha OS=Homo sapiens OX=9606 GN=PIP4K2A PE=1 SV=2	PIP4K2A	1.47479	0.00306925	None	33	12	65	6	12	46.2	1.53463e+07	1.57436e+07	1.82427e+07	9.67483e+06	9.97206e+06	9833925	0.802513	0.903665	0.833494	1.19711	1.37392	1.17447
Q9NZD2	Glycolipid transfer protein OS=Homo sapiens OX=9606 GN=GLTP PE=1 SV=3	GLTP	1.47326		None	20	4	9	4	4	23.8	126228	156542	228945			107101	0.721743	0.98246	1.14373			1.39858
O95782	AP-2 complex subunit alpha-1 OS=Homo sapiens OX=9606 GN=AP2A1 PE=1 SV=3	AP2A1	1.47289	0.00128857	None	45	37	532	29	37	107.5	1.57082e+08	1.61996e+08	1.80228e+08	9.93141e+07	9.64728e+07	1.03346e+08	0.84893	0.960955	0.851003	1.26998	1.37365	1.27557
P36871	Phosphoglucomutase-1 OS=Homo sapiens OX=9606 GN=PGM1 PE=1 SV=3	PGM1	1.47276	0.000303202	None	52	24	359	24	24	61.4	1.83667e+08	1.71329e+08	2.06973e+08	1.08607e+08	1.02767e+08	1.25247e+08	0.849229	0.869519	0.836127	1.1882	1.25192	1.32259
Q8IWV7	E3 ubiquitin-protein ligase UBR1 OS=Homo sapiens OX=9606 GN=UBR1 PE=1 SV=1	UBR1	1.47222	0.262592	None	7	8	35	8	8	200.1	2.70768e+06	4.28139e+06	6.12056e+06	2.9047e+06	3.00952e+06	1.74073e+06	0.524793	0.910817	1.03645	1.33209	1.53679	0.770526
P39656	Dolichyl-diphosphooligosaccharide--protein glycosyltransferase 48 kDa subunit OS=Homo sapiens OX=9606 GN=DDOST PE=1 SV=4	DDOST	1.47116	0.000147034	None	49	15	511	15	15	50.8	2.82837e+08	2.56172e+08	3.46033e+08	1.74383e+08	1.63711e+08	1.88544e+08	0.867012	0.861939	0.926767	1.26483	1.32219	1.31997
Q9Y3E0	Vesicle transport protein GOT1B OS=Homo sapiens OX=9606 GN=GOLT1B PE=1 SV=1	GOLT1B	1.47071	0.0666931	None	25	4	65	4	4	15.4	2.05166e+07	2.57124e+07	2.10567e+07	1.17446e+07	1.24482e+07	1.67055e+07	0.860943	1.18431	0.772013	1.16613	1.37626	1.60101
Q6YN16	Hydroxysteroid dehydrogenase-like protein 2 OS=Homo sapiens OX=9606 GN=HSDL2 PE=1 SV=1	HSDL2	1.47011	0.283892	None	45	14	132	14	14	45.4	5.05618e+07	4.43352e+07	5.61136e+07	2.1328e+07	4.27885e+07	2.39717e+07	0.986374	0.949344	0.956429	0.984486	2.19925	1.06803
O00399	Dynactin subunit 6 OS=Homo sapiens OX=9606 GN=DCTN6 PE=1 SV=1	DCTN6	1.47002	0.0228571	None	26	4	29	4	4	20.7	5.99905e+06	4.89061e+06	8.2348e+06	3.63259e+06	3.1752e+06	4.52115e+06	0.89102	0.797304	1.06862	1.27662	1.24252	1.53362
Q9H223	EH domain-containing protein 4 OS=Homo sapiens OX=9606 GN=EHD4 PE=1 SV=1	EHD4	1.46759	0.000890327	None	47	22	252	15	17	61.1	3.68931e+07	31952089	4.31522e+07	2.32187e+07	1.88912e+07	2.4623e+07	1.06324	1.01074	1.08656	1.5833	1.43441	1.62065
O15269	Serine palmitoyltransferase 1 OS=Homo sapiens OX=9606 GN=SPTLC1 PE=1 SV=1	SPTLC1	1.46699	0.000541756	None	38	13	110	13	13	52.7	2.41601e+07	2.23447e+07	28016231	1.62755e+07	1.30757e+07	1.50497e+07	0.94819	0.962556	0.960663	1.51137	1.35203	1.34893
P06493	Cyclin-dependent kinase 1 OS=Homo sapiens OX=9606 GN=CDK1 PE=1 SV=3	CDK1	1.46531	0.00178262	None	21	5	33	4	4	34.1	5.42493e+06	5.76808e+06	6.72648e+06	3.51544e+06	3.4409e+06	3.70178e+06	0.995434	1.16173	1.07838	1.5263	1.66348	1.55129
Q9Y697	Cysteine desulfurase, mitochondrial OS=Homo sapiens OX=9606 GN=NFS1 PE=1 SV=3	NFS1	1.46445	0.0228057	None	28	10	73	10	10	50.2	1.59175e+07	1.43868e+07	1.48944e+07	7.84841e+06	9.32659e+06	9.78633e+06	0.999443	0.991523	0.81709	1.16602	1.54288	1.40335
Q96S66	Chloride channel CLIC-like protein 1 OS=Homo sapiens OX=9606 GN=CLCC1 PE=1 SV=1	CLCC1	1.46443	0.0212051	None	16	7	71	7	7	62	8.9059e+06	8176344	8.94129e+06	4.74277e+06	4358001	6.53327e+06	1.00658	1.01434	0.882949	1.26836	1.29773	1.68642
Q2TAA5	GDP-Man:Man(3)GlcNAc(2)-PP-Dol alpha-1,2-mannosyltransferase OS=Homo sapiens OX=9606 GN=ALG11 PE=1 SV=2	ALG11	1.46388	0.00607089	None	21	7	83	7	7	55.6	1.05338e+07	9.17637e+06	1.1876e+07	6.52901e+06	6.34548e+06	5.77425e+06	0.842902	0.80597	0.830288	1.23618	1.33778	1.05524
Q9UBV7	Beta-1,4-galactosyltransferase 7 OS=Homo sapiens OX=9606 GN=B4GALT7 PE=1 SV=1	B4GALT7	1.46155	0.00264334	None	12	4	48	4	4	37.4	8.6238e+06	7.17727e+06	8.82908e+06	4.79097e+06	4.23927e+06	5.64288e+06	1.12462	1.02736	1.00598	1.47833	1.45656	1.68064
O75915	PRA1 family protein 3 OS=Homo sapiens OX=9606 GN=ARL6IP5 PE=1 SV=1	ARL6IP5	1.4601	0.0029043	None	25	5	194	5	5	21.6	4.94749e+07	3.97729e+07	5.97633e+07	3.02825e+07	2.55629e+07	32059141	0.955996	0.843556	1.00895	1.38453	1.30139	1.41478
P27824	Calnexin OS=Homo sapiens OX=9606 GN=CANX PE=1 SV=2	CANX	1.45966	9.8045e-05	None	55	31	758	31	31	67.5	6.54658e+08	6.39573e+08	7.89272e+08	4.30992e+08	3.72285e+08	4.31818e+08	0.935535	1.00321	0.985456	1.45732	1.40168	1.40933
Q9UDW1	Cytochrome b-c1 complex subunit 9 OS=Homo sapiens OX=9606 GN=UQCR10 PE=1 SV=3	UQCR10	1.45951	0.000967721	None	38	2	45	2	2	7.3	11982400	11336040	1.57526e+07	7.91784e+06	7.18604e+06	7.91145e+06	0.851078	0.883777	0.977558	1.33068	1.34475	1.28335
Q9NUL3	Double-stranded RNA-binding protein Staufen homolog 2 OS=Homo sapiens OX=9606 GN=STAU2 PE=1 SV=2	STAU2	1.45916	0.127917	None	8	4	24	2	2	62.6	1.36691e+06	1.5633e+06	2.02126e+06	704622	1.11743e+06	1.07885e+06	0.858028	1.07712	1.10854	1.04655	1.84804	1.54664
P09110	3-ketoacyl-CoA thiolase, peroxisomal OS=Homo sapiens OX=9606 GN=ACAA1 PE=1 SV=2	ACAA1	1.45838	9.18496e-06	None	36	11	147	11	11	44.3	2.81227e+07	2.51519e+07	3.22207e+07	1.68374e+07	1.56087e+07	1.81134e+07	1.01083	0.992308	1.01186	1.43198	1.47813	1.48691
Q12981	Vesicle transport protein SEC20 OS=Homo sapiens OX=9606 GN=BNIP1 PE=1 SV=3	BNIP1	1.45642	0.00664785	None	29	6	31	6	6	26.1	3.74152e+06	3.54619e+06	4.65257e+06	2.59003e+06	1.87527e+06	2.61377e+06	0.876185	0.911518	0.951929	1.43513	1.15701	1.39791
P61586	Transforming protein RhoA OS=Homo sapiens OX=9606 GN=RHOA PE=1 SV=1	RHOA	1.45615	0.00730371	None	66	11	406	2	12	21.8	2.10967e+08	1.99681e+08	2.60052e+08	1.32955e+08	1.07156e+08	1.57757e+08	0.903859	0.939026	0.973445	1.34782	1.20956	1.54362
Q96JJ7	Protein disulfide-isomerase TMX3 OS=Homo sapiens OX=9606 GN=TMX3 PE=1 SV=2	TMX3	1.45572	0.000391984	None	28	11	221	11	11	51.8	6.06651e+07	5.10753e+07	6.27726e+07	3.57728e+07	3.06337e+07	3.69585e+07	1.04526	0.965946	0.944976	1.45841	1.39063	1.45434
Q9P2X0	Dolichol-phosphate mannosyltransferase subunit 3 OS=Homo sapiens OX=9606 GN=DPM3 PE=1 SV=2	DPM3	1.45279	0.00406392	None	24	2	43	2	2	10.1	1.35947e+07	1.27342e+07	1.64027e+07	9.3883e+06	6.85338e+06	9.02258e+06	0.898576	0.923878	0.947255	1.4683	1.19349	1.36202
Q7Z2X4	PTB-containing, cubilin and LRP1-interacting protein OS=Homo sapiens OX=9606 GN=PID1 PE=1 SV=1	PID1	1.44954	0.0939789	None	50	9	70	9	9	28.3	4.35558e+07	2.31252e+07	4.86917e+07	2.18938e+07	1.93282e+07	2.57763e+07	1.06601	0.621235	1.0412	1.26788	1.24633	1.44079
Q8WTV0	Scavenger receptor class B member 1 OS=Homo sapiens OX=9606 GN=SCARB1 PE=1 SV=1	SCARB1	1.44889	0.660473	None	6	2	11	2	2	60.8	529957	641503	1.23228e+06	253390	811691	267052	0.508727	0.675925	1.03352	0.575537	2.05288	0.585471
Q92538	Golgi-specific brefeldin A-resistance guanine nucleotide exchange factor 1 OS=Homo sapiens OX=9606 GN=GBF1 PE=1 SV=2	GBF1	1.44828	0.00213114	None	29	39	298	39	39	206.3	6.06862e+07	5.21259e+07	6.58232e+07	3.23998e+07	3.38819e+07	3.85816e+07	0.985977	0.929579	0.934375	1.24555	1.45035	1.4316
Q13126	S-methyl-5'-thioadenosine phosphorylase OS=Homo sapiens OX=9606 GN=MTAP PE=1 SV=2	MTAP	1.4481	0.00245311	None	65	14	131	14	14	31.2	3.68808e+07	3.22997e+07	3.84986e+07	2.07178e+07	1.83538e+07	2.45545e+07	0.922458	0.886748	0.841311	1.22611	1.20948	1.40263
Q9UPT9	Ubiquitin carboxyl-terminal hydrolase 22 OS=Homo sapiens OX=9606 GN=USP22 PE=1 SV=2	USP22	1.44588		None	6	2	4	2	2	59.9	813524	852379	1.21497e+06		514149		0.855209	0.983536	1.11592		1.42403
O96011	Peroxisomal membrane protein 11B OS=Homo sapiens OX=9606 GN=PEX11B PE=1 SV=1	PEX11B	1.44588	0.0187565	None	46	9	79	9	9	28.4	1.03168e+07	9.20079e+06	1.12715e+07	7.29298e+06	4.77265e+06	6.09812e+06	0.926004	0.906464	0.883926	1.54887	1.12864	1.25006
Q9Y2H6	Fibronectin type-III domain-containing protein 3A OS=Homo sapiens OX=9606 GN=FNDC3A PE=1 SV=4	FNDC3A	1.44569	0.000427831	None	27	21	117	21	21	131.8	2.06788e+07	1.99903e+07	2.62833e+07	1.33207e+07	1.16753e+07	1.4246e+07	1.01891	1.08115	1.1315	1.55303	1.51568	1.60314
P25705	ATP synthase subunit alpha, mitochondrial OS=Homo sapiens OX=9606 GN=ATP5F1A PE=1 SV=1	ATP5F1A	1.44568	0.000114417	None	61	31	974	31	31	59.7	1.17575e+09	1.15222e+09	1433540602	7.65676e+08	6.69061e+08	7.72558e+08	0.929412	0.999733	0.990072	1.43211	1.39343	1.39472
O00506	Serine/threonine-protein kinase 25 OS=Homo sapiens OX=9606 GN=STK25 PE=1 SV=1	STK25	1.4449	0.0947044	None	7	3	21	2	2	48.1	281149	318918	379535	151396	225283	192389	0.923503	1.14984	1.08923	1.17668	1.94965	1.44327
Q24JP5	Transmembrane protein 132A OS=Homo sapiens OX=9606 GN=TMEM132A PE=1 SV=1	TMEM132A	1.44364	0.276917	None	6	6	18	6	6	110	442838	351462	286972	153823	284882	194254	0.25645	0.223405	0.145199	0.210775	0.434661	0.256917
P33121	Long-chain-fatty-acid--CoA ligase 1 OS=Homo sapiens OX=9606 GN=ACSL1 PE=1 SV=1	ACSL1	1.4423	0.00627033	None	19	11	70	11	11	77.9	1.05255e+07	7.84759e+06	1.0735e+07	5.53621e+06	5.02242e+06	6.48049e+06	0.885256	0.724465	0.788844	1.10174	1.11292	1.24479
Q9GZX9	Twisted gastrulation protein homolog 1 OS=Homo sapiens OX=9606 GN=TWSG1 PE=1 SV=1	TWSG1	1.4421	0.0335513	None	15	3	27	3	3	25	1.59753e+06	2.08091e+06	2.05427e+06	1.03455e+06	1.08994e+06	1.25511e+06	0.80048	1.14449	0.899341	1.22658	1.4389	1.43631
P61158	Actin-related protein 3 OS=Homo sapiens OX=9606 GN=ACTR3 PE=1 SV=3	ACTR3	1.44045	0.00104761	None	55	18	490	18	18	47.3	3.79035e+08	3.30961e+08	4.36748e+08	2.4014e+08	2.0966e+08	2.18198e+08	0.922003	0.883659	0.928215	1.38216	1.34368	1.21219
P11182	Lipoamide acyltransferase component of branched-chain alpha-keto acid dehydrogenase complex, mitochondrial OS=Homo sapiens OX=9606 GN=DBT PE=1 SV=3	DBT	1.43873	0.0529018	None	23	9	64	9	9	53.5	6.24894e+06	4.94547e+06	6.78814e+06	4.33351e+06	3.17376e+06	2.94142e+06	0.759095	0.659407	0.720454	1.24558	1.01576	0.816042
O75940	Survival of motor neuron-related-splicing factor 30 OS=Homo sapiens OX=9606 GN=SMNDC1 PE=1 SV=1	SMNDC1	1.4378	0.0172241	None	18	3	7	3	3	26.7	2.65693e+06	3.19912e+06	3.13311e+06	1.74255e+06	1566504	1.9942e+06	0.965041	1.27542	0.994276	1.49759	1.49908	1.65424
Q15392	Delta(24)-sterol reductase OS=Homo sapiens OX=9606 GN=DHCR24 PE=1 SV=2	DHCR24	1.43506	0.0012789	None	12	6	49	6	6	60.1	1.45533e+08	1.1644e+08	1.63642e+08	8.12703e+07	7.79417e+07	8.74791e+07	0.8738	0.767376	0.858444	1.15458	1.23296	1.19956
Q99720	Sigma non-opioid intracellular receptor 1 OS=Homo sapiens OX=9606 GN=SIGMAR1 PE=1 SV=1	SIGMAR1	1.43448	0.103998	None	9	2	13	2	2	25.1	13860185	1.1584e+07	1.62034e+07	8369787	5392851	1.06911e+07	1.09968	1.00881	1.12322	1.57127	1.1273	1.93723
P15848	Arylsulfatase B OS=Homo sapiens OX=9606 GN=ARSB PE=1 SV=1	ARSB	1.43422	0.0468448	None	32	14	130	14	14	59.6	1.91106e+07	1.83207e+07	1.88879e+07	9.39707e+06	9.64844e+06	1.41266e+07	0.722416	0.760171	0.623821	0.840515	0.960941	1.21959
Q15738	Sterol-4-alpha-carboxylate 3-dehydrogenase, decarboxylating OS=Homo sapiens OX=9606 GN=NSDHL PE=1 SV=2	NSDHL	1.43369	0.00981658	None	53	13	160	13	13	41.9	2.69987e+07	2.46271e+07	3.27378e+07	1.43706e+07	1.65328e+07	1.79124e+07	1.00562	1.00683	1.06538	1.26649	1.62242	1.52373
Q9UKS6	Protein kinase C and casein kinase substrate in neurons protein 3 OS=Homo sapiens OX=9606 GN=PACSIN3 PE=1 SV=2	PACSIN3	1.43353	0.0469492	None	18	6	35	6	6	48.5	4.96011e+06	3.5183e+06	4.99721e+06	2.70515e+06	1.9609e+06	3.21311e+06	1.21921	0.949242	1.0732	1.57334	1.26991	1.80376
Q9H553	Alpha-1,3/1,6-mannosyltransferase ALG2 OS=Homo sapiens OX=9606 GN=ALG2 PE=1 SV=1	ALG2	1.43348	0.00277796	None	32	10	139	10	10	47.1	1.93244e+07	1.68105e+07	2.38595e+07	1.16695e+07	9.94602e+06	1.3231e+07	0.911971	0.870782	0.983787	1.30307	1.23666	1.42604
O95298	NADH dehydrogenase [ubiquinone] 1 subunit C2 OS=Homo sapiens OX=9606 GN=NDUFC2 PE=1 SV=1	NDUFC2	1.43131	0.038967	None	29	4	30	4	4	14.2	3.27273e+06	4.06396e+06	4.3194e+06	2.06474e+06	2.411e+06	2.29127e+06	0.824349	1.12358	0.950583	1.23057	1.60002	1.31808
Q9NQ34	Transmembrane protein 9B OS=Homo sapiens OX=9606 GN=TMEM9B PE=1 SV=1	TMEM9B	1.43127	0.000564564	None	14	3	16	2	2	22.5	607912	605227	712584	392439	350157	376939	0.844079	0.922395	0.864458	1.28931	1.28095	1.1953
Q8NBJ5	Procollagen galactosyltransferase 1 OS=Homo sapiens OX=9606 GN=COLGALT1 PE=1 SV=1	COLGALT1	1.4291	7.17453e-05	None	46	26	498	26	26	71.6	162383985	1.39234e+08	1.85282e+08	9.46108e+07	8.67485e+07	1.00445e+08	0.964652	0.907881	0.961671	1.32987	1.35774	1.36276
Q16795	NADH dehydrogenase [ubiquinone] 1 alpha subcomplex subunit 9, mitochondrial OS=Homo sapiens OX=9606 GN=NDUFA9 PE=1 SV=2	NDUFA9	1.42903	0.00163976	None	43	14	212	14	14	42.5	4.3774e+07	3.66108e+07	5.28355e+07	2.52837e+07	2.3209e+07	2.84497e+07	0.933674	0.857125	0.984622	1.27603	1.30425	1.38587
O75746	Calcium-binding mitochondrial carrier protein Aralar1 OS=Homo sapiens OX=9606 GN=SLC25A12 PE=1 SV=2	SLC25A12	1.429	0.0130942	None	34	20	187	14	14	74.7	2.24407e+07	2.26772e+07	3.2563e+07	1.48068e+07	1.27705e+07	1.73445e+07	0.790814	0.877167	1.0026	1.23464	1.1857	1.39593
P11279	Lysosome-associated membrane glycoprotein 1 OS=Homo sapiens OX=9606 GN=LAMP1 PE=1 SV=3	LAMP1	1.42841	0.00104149	None	28	10	104	10	10	44.9	6.73992e+07	6.03873e+07	8.16394e+07	4.18019e+07	3.45984e+07	4.50006e+07	0.779852	0.766935	0.82532	1.14444	1.05473	1.18916
P53701	Holocytochrome c-type synthase OS=Homo sapiens OX=9606 GN=HCCS PE=1 SV=1	HCCS	1.42811	0.00145205	None	13	4	38	4	4	30.6	6.46862e+06	6524173	8.48999e+06	4.07112e+06	3.91538e+06	4.42653e+06	0.873599	0.967123	1.00178	1.30093	1.39316	1.3653
P30519	Heme oxygenase 2 OS=Homo sapiens OX=9606 GN=HMOX2 PE=1 SV=2	HMOX2	1.42646	0.0930955	None	49	12	181	12	12	36	3.57367e+07	5.1249e+07	6.73123e+07	3.27027e+07	2.8296e+07	2.76644e+07	0.783477	1.23325	1.28935	1.69643	1.63442	1.38515
Q9NZ45	CDGSH iron-sulfur domain-containing protein 1 OS=Homo sapiens OX=9606 GN=CISD1 PE=1 SV=1	CISD1	1.42179	0.0079243	None	26	2	22	2	2	12.2	3.66492e+06	3.04596e+06	4.72319e+06	2067679	2.04194e+06	2.43419e+06	0.857989	0.782704	0.96609	1.14536	1.25947	1.30148
O95870	Phosphatidylserine lipase ABHD16A OS=Homo sapiens OX=9606 GN=ABHD16A PE=1 SV=3	ABHD16A	1.42123	0.0230473	None	25	10	104	10	10	63.2	6.87426e+06	5.23214e+06	8.76944e+06	4.49293e+06	3.49991e+06	3.92729e+06	0.927645	0.774982	1.03393	1.43459	1.24435	1.21036
Q12797	Aspartyl/asparaginyl beta-hydroxylase OS=Homo sapiens OX=9606 GN=ASPH PE=1 SV=3	ASPH	1.42038	8.8624e-05	None	41	29	595	29	29	85.8	2.09787e+08	1.88564e+08	2.50863e+08	1.29853e+08	1.11401e+08	1.32461e+08	0.93589	0.92334	0.977794	1.37069	1.30937	1.34958
P00750	Tissue-type plasminogen activator OS=Homo sapiens OX=9606 GN=PLAT PE=1 SV=1	PLAT	1.41967	0.16035	None	28	12	82	12	12	62.9	1.25901e+07	9.87613e+06	7.33598e+06	6.95882e+06	5.17201e+06	5.37285e+06	0.959277	0.82596	0.488359	1.25456	1.03825	0.934944
Q8IVL5	Prolyl 3-hydroxylase 2 OS=Homo sapiens OX=9606 GN=P3H2 PE=1 SV=1	P3H2	1.41857	0.0679024	None	9	4	26	3	3	80.9	877997	669730	970667	485884	538667	403921	0.65382	0.54742	0.631539	0.856128	1.05685	0.686952
O75477	Erlin-1 OS=Homo sapiens OX=9606 GN=ERLIN1 PE=1 SV=2	ERLIN1	1.41782	0.00366227	None	24	6	86	5	5	39.1	7.97417e+06	7.29053e+06	9.92165e+06	4.74555e+06	4.86613e+06	4.76962e+06	1.07717	1.08097	1.17097	1.51679	1.73185	1.47145
Q9P2C4	Transmembrane protein 181 OS=Homo sapiens OX=9606 GN=TMEM181 PE=1 SV=2	TMEM181	1.41774	0.0344947	None	5	3	29	3	3	69.3	4.62773e+06	4.48004e+06	4.97798e+06	2.24166e+06	2.76951e+06	3.10786e+06	0.835285	0.887573	0.785027	0.957363	1.31703	1.28113
Q5U5X0	Complex III assembly factor LYRM7 OS=Homo sapiens OX=9606 GN=LYRM7 PE=1 SV=1	LYRM7	1.41708	0.00640774	None	26	2	12	2	2	11.9	812811	727170	986763	483075	495502	462413	1.04183	1.02306	1.10506	1.46509	1.67333	1.35364
Q03518	Antigen peptide transporter 1 OS=Homo sapiens OX=9606 GN=TAP1 PE=1 SV=2	TAP1	1.41706	0.00778803	None	28	13	106	13	13	87.2	2.45106e+07	2.30129e+07	2.7562e+07	1.67589e+07	1.26598e+07	1.38553e+07	0.829837	0.855197	0.815294	1.34254	1.12926	1.07132
Q6NUK1	Calcium-binding mitochondrial carrier protein SCaMC-1 OS=Homo sapiens OX=9606 GN=SLC25A24 PE=1 SV=2	SLC25A24	1.4165	0.00142411	None	44	20	372	20	20	53.3	1.4303e+08	1.28512e+08	1.70216e+08	8.28998e+07	7.41561e+07	9.70037e+07	0.908838	0.896306	0.94498	1.24639	1.24146	1.4077
Q13464	Rho-associated protein kinase 1 OS=Homo sapiens OX=9606 GN=ROCK1 PE=1 SV=1	ROCK1	1.41471	0.00398031	None	21	25	145	19	19	158.1	2.95714e+07	2.59761e+07	3.16361e+07	1.84817e+07	1.37993e+07	1.80344e+07	1.02405	0.987368	0.957187	1.51437	1.25902	1.42631
P37235	Hippocalcin-like protein 1 OS=Homo sapiens OX=9606 GN=HPCAL1 PE=1 SV=3	HPCAL1	1.41451	0.0321827	None	23	4	31	4	4	22.3	1.03698e+07	8.43166e+06	1.48366e+07	5984934	5.7777e+06	7.31731e+06	1.0232	0.913185	1.27905	1.3973	1.50201	1.64895
Q04760	Lactoylglutathione lyase OS=Homo sapiens OX=9606 GN=GLO1 PE=1 SV=4	GLO1	1.4138	0.00047993	None	55	9	159	9	9	20.8	1.01514e+08	9.55413e+07	127890974	6.51924e+07	5.50765e+07	6.5853e+07	0.868193	0.896883	0.955639	1.31925	1.24103	1.28626
Q14764	Major vault protein OS=Homo sapiens OX=9606 GN=MVP PE=1 SV=4	MVP	1.41379	0.000335323	None	53	41	905	41	41	99.3	5.92881e+08	5.26976e+08	6.37537e+08	3.29951e+08	3.08808e+08	3.71815e+08	0.908817	0.886658	0.853846	1.19674	1.24717	1.30167
P35998	26S proteasome regulatory subunit 7 OS=Homo sapiens OX=9606 GN=PSMC2 PE=1 SV=3	PSMC2	1.4117	0.000440115	None	65	27	395	27	27	48.6	1.73152e+08	1.62044e+08	1.97631e+08	1.07844e+08	9.58739e+07	1.01372e+08	0.984124	1.01091	0.98139	1.4503	1.43565	1.31584
Q9NRN7	L-aminoadipate-semialdehyde dehydrogenase-phosphopantetheinyl transferase OS=Homo sapiens OX=9606 GN=AASDHPPT PE=1 SV=2	AASDHPPT	1.41153	0.00192597	None	19	5	35	5	5	35.8	8.93713e+06	8.80414e+06	1.07201e+07	5.46692e+06	4.68068e+06	6.22139e+06	0.973879	1.05305	1.02064	1.40958	1.34383	1.54832
P49959	Double-strand break repair protein MRE11 OS=Homo sapiens OX=9606 GN=MRE11 PE=1 SV=3	MRE11	1.41103	0.00684926	None	22	12	59	12	12	80.5	2.23466e+07	1.96116e+07	2.89242e+07	1.25433e+07	1.31771e+07	1.45227e+07	0.888484	0.855867	1.00476	1.18002	1.38034	1.31871
Q8WUY1	Protein THEM6 OS=Homo sapiens OX=9606 GN=THEM6 PE=1 SV=2	THEM6	1.41079	0.0467574	None	12	2	21	2	2	23.9	562326	387585	720823	348142	267533	329880	1.03307	0.781563	1.157	1.51335	1.29493	1.38408
P49840	Glycogen synthase kinase-3 alpha OS=Homo sapiens OX=9606 GN=GSK3A PE=1 SV=2	GSK3A	1.4105	0.00116543	None	16	7	42	4	4	50.9	1.12346e+07	1.12671e+07	1.26143e+07	7.14144e+06	6.17095e+06	6.86545e+06	0.952248	1.04823	0.934156	1.43225	1.37807	1.329
Q9BTV4	Transmembrane protein 43 OS=Homo sapiens OX=9606 GN=TMEM43 PE=1 SV=1	TMEM43	1.41024	0.00102494	None	52	19	386	19	19	44.8	1.78892e+08	1.63746e+08	2.23649e+08	1.04739e+08	9.87869e+07	1.19629e+08	0.956494	0.960988	1.04477	1.32508	1.39161	1.46081
P51809	Vesicle-associated membrane protein 7 OS=Homo sapiens OX=9606 GN=VAMP7 PE=1 SV=3	VAMP7	1.40883	0.0165294	None	46	9	92	9	9	24.9	1.14786e+07	1.20344e+07	1.20599e+07	7.59986e+06	6.37799e+06	6.49755e+06	0.933143	1.07384	0.856582	1.46186	1.36607	1.20636
Q15382	GTP-binding protein Rheb OS=Homo sapiens OX=9606 GN=RHEB PE=1 SV=1	RHEB	1.40744	0.00113363	None	24	6	76	6	6	20.5	1.9302e+07	1.85395e+07	2.31692e+07	12743314	10101507	1.20549e+07	0.964824	1.01719	1.01186	1.50719	1.33033	1.37618
P08240	Signal recognition particle receptor subunit alpha OS=Homo sapiens OX=9606 GN=SRPRA PE=1 SV=2	SRPRA	1.40692	0.000794594	None	34	20	235	20	20	69.8	8.09641e+07	7.38774e+07	8.48151e+07	4.81872e+07	4.019e+07	4.91931e+07	1.05117	1.0528	0.962094	1.48031	1.37475	1.45864
Q8N3R9	Protein PALS1 OS=Homo sapiens OX=9606 GN=PALS1 PE=1 SV=3	PALS1	1.40648	0.735766	None	15	5	20	5	5	77.2	1.93605e+06	1.314e+06	2.28559e+06	562997		1.62358e+06	1.17777	0.877394	1.21481	0.810382		2.25571
Q14457	Beclin-1 OS=Homo sapiens OX=9606 GN=BECN1 PE=1 SV=2	BECN1	1.40607	0.506602	None	7	2	5	2	2	51.9	278790	669541	690917	198673	201331	557648	0.366797	0.966898	0.794216	0.618484	0.69789	1.67561
Q15139	Serine/threonine-protein kinase D1 OS=Homo sapiens OX=9606 GN=PRKD1 PE=1 SV=2	PRKD1	1.40556	0.894081	None	13	8	39	4	8	101.6	3.80719e+07	2.8099e+06	9.23976e+06	2.6722e+07	1.00176e+06	1.45671e+06	3.1307	0.25362	0.663838	5.19933	0.217033	0.273575
O43674	NADH dehydrogenase [ubiquinone] 1 beta subcomplex subunit 5, mitochondrial OS=Homo sapiens OX=9606 GN=NDUFB5 PE=1 SV=1	NDUFB5	1.40463	0.656809	None	21	4	44	4	4	21.7	1.04596e+07	9.74242e+06	1.13028e+07	2.33529e+06	7.37041e+06	8.16133e+06	0.847663	0.866623	0.800308	0.447806	1.57372	1.51055
O75880	Protein SCO1 homolog, mitochondrial OS=Homo sapiens OX=9606 GN=SCO1 PE=1 SV=1	SCO1	1.40461	0.00111668	None	30	7	58	7	7	33.8	2.24515e+07	1.9843e+07	2.54661e+07	1.3722e+07	1.22159e+07	1.25785e+07	1.03437	1.00345	1.02509	1.49587	1.48282	1.32351
Q5NDL2	EGF domain-specific O-linked N-acetylglucosamine transferase OS=Homo sapiens OX=9606 GN=EOGT PE=1 SV=1	EOGT	1.40393	0.122623	None	30	12	92	12	12	62	9.15649e+06	7.98983e+06	1.03167e+07	6.09986e+06	5.49226e+06	3.90514e+06	0.873334	0.836459	0.859724	1.37661	1.38016	0.850654
Q99623	Prohibitin-2 OS=Homo sapiens OX=9606 GN=PHB2 PE=1 SV=2	PHB2	1.40039	0.00618642	None	67	17	346	17	17	33.3	2.27375e+08	1.86734e+08	2.51365e+08	1.36978e+08	1.20403e+08	1.18949e+08	1.0624	0.95769	1.02616	1.51439	1.48222	1.26932
Q15477	Helicase SKI2W OS=Homo sapiens OX=9606 GN=SKIV2L PE=1 SV=3	SKIV2L	1.4003	0.000487331	None	23	23	217	23	23	137.7	2.4853e+07	23984593	2.78684e+07	1.55746e+07	1.31261e+07	1.50304e+07	0.858343	0.909223	0.84093	1.27274	1.19439	1.18554
Q8TBX8	Phosphatidylinositol 5-phosphate 4-kinase type-2 gamma OS=Homo sapiens OX=9606 GN=PIP4K2C PE=1 SV=3	PIP4K2C	1.40006	0.0209871	None	26	8	52	8	8	47.3	8.35899e+06	6.4766e+06	1.01384e+07	5.19283e+06	4.47179e+06	4.3738e+06	1.0749	0.914151	1.13907	1.58001	1.51504	1.28452
P62826	GTP-binding nuclear protein Ran OS=Homo sapiens OX=9606 GN=RAN PE=1 SV=3	RAN	1.39948	0.000218025	None	47	12	274	12	12	24.4	3.92805e+08	3.66915e+08	4.37677e+08	2.32815e+08	2.00505e+08	2.49304e+08	0.99997	1.02525	0.973483	1.40236	1.34481	1.44945
Q7L576	Cytoplasmic FMR1-interacting protein 1 OS=Homo sapiens OX=9606 GN=CYFIP1 PE=1 SV=1	CYFIP1	1.39907	0.000193298	None	28	33	287	33	33	145.1	7.74548e+07	7.13318e+07	9.31974e+07	4.49537e+07	4.32928e+07	4.87773e+07	0.942744	0.952981	0.991092	1.29465	1.38832	1.3559
Q7Z3J2	VPS35 endosomal protein-sorting factor-like OS=Homo sapiens OX=9606 GN=VPS35L PE=1 SV=2	VPS35L	1.39891	0.85649	None	15	12	49	12	12	109.5	8.74083e+06	8.22438e+06	9.10324e+06	982501	2.50959e+06	1.18422e+07	0.866511	0.894913	0.788466	0.23046	0.655468	2.68114
P55786	Puromycin-sensitive aminopeptidase OS=Homo sapiens OX=9606 GN=NPEPPS PE=1 SV=2	NPEPPS	1.39751	0.000280946	None	44	33	412	33	33	103.2	1.52085e+08	1.44867e+08	1.70155e+08	8.74363e+07	8.41137e+07	9.37105e+07	0.888553	0.929015	0.868571	1.20873	1.29476	1.2504
Q15006	ER membrane protein complex subunit 2 OS=Homo sapiens OX=9606 GN=EMC2 PE=1 SV=1	EMC2	1.39722	0.0328032	None	41	9	111	9	9	34.8	2.06813e+07	1.88833e+07	2.48383e+07	1.00844e+07	1.24827e+07	1.37614e+07	0.954064	0.956167	1.00112	1.10076	1.51717	1.44986
Q9UKV5	E3 ubiquitin-protein ligase AMFR OS=Homo sapiens OX=9606 GN=AMFR PE=1 SV=2	AMFR	1.39345	0.132636	None	5	2	4	2	2	72.9	355738	331637	453324	157194	242306	238417	1.05952	1.08417	1.17965	1.10779	1.90139	1.62174
P28300	Protein-lysine 6-oxidase OS=Homo sapiens OX=9606 GN=LOX PE=1 SV=2	LOX	1.39295	0.0290714	None	47	10	122	10	10	46.9	40940865	2.79709e+07	4.82515e+07	2.20494e+07	1.96789e+07	2.38626e+07	1.12005	0.83993	1.15334	1.42731	1.41844	1.49095
P84022	Mothers against decapentaplegic homolog 3 OS=Homo sapiens OX=9606 GN=SMAD3 PE=1 SV=1	SMAD3	1.39195	0.0514978	None	18	7	48	4	7	48.1	1.11629e+07	1.02732e+07	1.25171e+07	6.91721e+06	6.78716e+06	5.34525e+06	1.02177	1.03213	1.00102	1.49812	1.63678	1.1174
Q8N511	Transmembrane protein 199 OS=Homo sapiens OX=9606 GN=TMEM199 PE=1 SV=1	TMEM199	1.39049	0.00842523	None	10	2	13	2	2	23.1	1305664	1.4033e+06	1.49804e+06	856874	672902	865582	0.816927	0.963737	0.818919	1.26856	1.10925	1.23687
O60518	Ran-binding protein 6 OS=Homo sapiens OX=9606 GN=RANBP6 PE=1 SV=2	RANBP6	1.38904	0.00644195	None	12	11	36	10	10	124.6	5.29308e+06	4.55e+06	5.49981e+06	2.63605e+06	2.75544e+06	3.26953e+06	1.14495	1.0803	1.03942	1.34919	1.57035	1.61521
P04843	Dolichyl-diphosphooligosaccharide--protein glycosyltransferase subunit 1 OS=Homo sapiens OX=9606 GN=RPN1 PE=1 SV=1	RPN1	1.38821	0.000190047	None	67	37	1017	37	37	68.5	7.81428e+08	7.33428e+08	9.47678e+08	4.77441e+08	4.08944e+08	5.01194e+08	0.890202	0.917091	0.943247	1.28694	1.22741	1.30398
Q9P0J7	E3 ubiquitin-protein ligase KCMF1 OS=Homo sapiens OX=9606 GN=KCMF1 PE=1 SV=2	KCMF1	1.38687	0.0975655	None	6	2	13	2	2	41.9	2.18714e+07	1.91866e+07	23210784	1.32135e+07	1.31558e+07	9.51837e+06	1.11563	1.07423	1.03442	1.59479	1.76803	1.10885
P55196	Afadin OS=Homo sapiens OX=9606 GN=AFDN PE=1 SV=3	AFDN	1.38635	0.0177997	None	11	12	49	12	12	206.7	3.50978e+06	3.18111e+06	4.8432e+06	1.96097e+06	2.11852e+06	2.34313e+06	0.953652	0.948734	1.14976	1.26073	1.5166	1.45402
Q15836	Vesicle-associated membrane protein 3 OS=Homo sapiens OX=9606 GN=VAMP3 PE=1 SV=3	VAMP3	1.38633	0.0201164	None	41	5	61	2	5	11.3	3.38752e+07	2.86975e+07	3.65868e+07	2.10562e+07	1.78919e+07	1.6632e+07	0.839556	0.780669	0.79224	1.23478	1.16829	0.941403
P49356	Protein farnesyltransferase subunit beta OS=Homo sapiens OX=9606 GN=FNTB PE=1 SV=1	FNTB	1.38497	0.00107907	None	10	4	28	4	4	48.7	2.71178e+06	2.63498e+06	3.31781e+06	1.63532e+06	1.42001e+06	1.8239e+06	0.646197	0.689196	0.690757	0.922047	0.891513	0.9926
Q9NTJ5	Phosphatidylinositol-3-phosphatase SAC1 OS=Homo sapiens OX=9606 GN=SACM1L PE=1 SV=2	SACM1L	1.38429	0.000372532	None	39	22	260	22	22	66.9	4.673e+07	4.32902e+07	5.54195e+07	2.87941e+07	2.3659e+07	2.93487e+07	0.908372	0.923665	0.941231	1.32438	1.21169	1.30293
Q14554	Protein disulfide-isomerase A5 OS=Homo sapiens OX=9606 GN=PDIA5 PE=1 SV=1	PDIA5	1.38348	0.00159889	None	67	34	589	34	34	59.6	2.13667e+08	2.0017e+08	2.53922e+08	1.35659e+08	1.16243e+08	1.22271e+08	0.720143	0.740521	0.747733	1.08186	1.03222	0.941178
Q96G23	Ceramide synthase 2 OS=Homo sapiens OX=9606 GN=CERS2 PE=1 SV=1	CERS2	1.38269	0.0566973	None	14	4	45	4	4	44.8	7.66783e+06	6.4681e+06	9.66089e+06	4.91874e+06	3.23804e+06	5.21934e+06	1.13992	1.05544	1.25482	1.7302	1.26827	1.77207
P26640	Valine--tRNA ligase OS=Homo sapiens OX=9606 GN=VARS1 PE=1 SV=4	VARS1	1.38149	0.00194323	None	36	37	346	37	37	140.4	1.26222e+08	1.1087e+08	1.45722e+08	6.73001e+07	6.65245e+07	8.05103e+07	0.972755	0.937864	0.981205	1.22723	1.35076	1.41705
P07942	Laminin subunit beta-1 OS=Homo sapiens OX=9606 GN=LAMB1 PE=1 SV=2	LAMB1	1.38108	4.11969e-06	None	35	51	743	51	51	197.9	2.17454e+08	1.96328e+08	2.50771e+08	1.2596e+08	1.15754e+08	1.30272e+08	1.08988	1.08006	1.09813	1.49376	1.52853	1.49117
Q8IXM3	39S ribosomal protein L41, mitochondrial OS=Homo sapiens OX=9606 GN=MRPL41 PE=1 SV=1	MRPL41	1.38033	0.0153137	None	44	4	36	4	4	15.4	7.72763e+06	8.94028e+06	9.0388e+06	4.91122e+06	4.25813e+06	5.37406e+06	0.899544	1.14231	0.919288	1.35271	1.30594	1.42871
Q8NFQ8	Torsin-1A-interacting protein 2 OS=Homo sapiens OX=9606 GN=TOR1AIP2 PE=1 SV=1	TOR1AIP2	1.37787	0.000426849	None	34	11	80	10	10	51.2	1.14649e+07	1.07904e+07	1.23243e+07	6.74904e+06	5.91466e+06	6.74326e+06	0.99188	1.02466	0.931576	1.38157	1.34818	1.33237
Q9NZN4	EH domain-containing protein 2 OS=Homo sapiens OX=9606 GN=EHD2 PE=1 SV=2	EHD2	1.37718	0.097667	None	59	25	428	22	25	61.1	2.16218e+08	2.01637e+08	2.43527e+08	1.0576e+08	1.46516e+08	1.1355e+08	1.07352	1.09886	1.0564	1.24245	1.91659	1.28756
Q86W92	Liprin-beta-1 OS=Homo sapiens OX=9606 GN=PPFIBP1 PE=1 SV=2	PPFIBP1	1.37559	0.00416084	None	25	19	160	19	19	114	3.01622e+07	28443237	3.04544e+07	1.7204e+07	1.46074e+07	1.83229e+07	0.986201	1.02079	0.869995	1.33098	1.25835	1.36823
Q6UWP7	Lysocardiolipin acyltransferase 1 OS=Homo sapiens OX=9606 GN=LCLAT1 PE=1 SV=1	LCLAT1	1.37436	0.0373911	None	14	5	44	5	5	48.9	6.27127e+06	6.57593e+06	8.36826e+06	3.37697e+06	4.11024e+06	4.27703e+06	0.985163	1.13388	1.14856	1.25522	1.70117	1.53448
P61619	Protein transport protein Sec61 subunit alpha isoform 1 OS=Homo sapiens OX=9606 GN=SEC61A1 PE=1 SV=2	SEC61A1	1.37389	0.00068127	None	26	11	225	11	11	52.2	2.38739e+08	2.14874e+08	2.70904e+08	1.39841e+08	1.15868e+08	1.49337e+08	1.05718	1.04439	1.0481	1.46521	1.35181	1.51028
P00367	Glutamate dehydrogenase 1, mitochondrial OS=Homo sapiens OX=9606 GN=GLUD1 PE=1 SV=2	GLUD1	1.37304	0.162694	None	55	23	462	23	23	61.4	1.87476e+08	1.66459e+08	2.15766e+08	8.85811e+07	1.31855e+08	9.20066e+07	0.997954	0.972588	1.00349	1.1157	1.84922	1.11853
O95140	Mitofusin-2 OS=Homo sapiens OX=9606 GN=MFN2 PE=1 SV=3	MFN2	1.37304	0.0316678	None	12	7	62	6	7	86.3	5.18719e+06	4.86094e+06	6.80161e+06	3.0514e+06	2.4942e+06	3.86017e+06	0.901873	0.92766	1.03321	1.25531	1.14254	1.5328
A1X283	SH3 and PX domain-containing protein 2B OS=Homo sapiens OX=9606 GN=SH3PXD2B PE=1 SV=3	SH3PXD2B	1.37127	0.355445	None	34	22	167	20	22	101.5	2.50878e+07	2.05125e+07	2.54026e+07	9.28779e+06	9.65335e+06	2.11494e+07	0.780026	0.700037	0.690065	0.683281	0.790773	1.50179
O75340	Programmed cell death protein 6 OS=Homo sapiens OX=9606 GN=PDCD6 PE=1 SV=1	PDCD6	1.37091	0.015528	None	33	6	116	6	6	21.9	4.31738e+07	3.14662e+07	4.80567e+07	2.15042e+07	2.1674e+07	2.4569e+07	0.964531	0.771608	0.938027	1.13674	1.27574	1.25357
Q96PU5	E3 ubiquitin-protein ligase NEDD4-like OS=Homo sapiens OX=9606 GN=NEDD4L PE=1 SV=2	NEDD4L	1.36951	0.271473	None	3	3	15	3	3	111.9	936555	1.90856e+06	3.02376e+06	1.07541e+06	1.04e+06	1.0881e+06	0.5208	1.16493	1.4691	1.41498	1.52369	1.38188
P20338	Ras-related protein Rab-4A OS=Homo sapiens OX=9606 GN=RAB4A PE=1 SV=3	RAB4A	1.36671	0.277043	None	20	4	46	2	2	24.4	1.0793e+06	937194	3.3855e+06	990349	795334	1.08802e+06	0.576749	0.549705	1.58064	1.2522	1.11975	1.32785
Q8NF37	Lysophosphatidylcholine acyltransferase 1 OS=Homo sapiens OX=9606 GN=LPCAT1 PE=1 SV=2	LPCAT1	1.36638	0.0595625	None	14	5	39	5	5	59.1	7.51282e+06	6.96126e+06	8.08634e+06	3.39545e+06	4.44049e+06	4.65268e+06	1.12785	1.14707	1.06063	1.20611	1.75633	1.5952
O75718	Cartilage-associated protein OS=Homo sapiens OX=9606 GN=CRTAP PE=1 SV=1	CRTAP	1.36567	0.000115056	None	52	20	389	19	20	46.5	1.08898e+08	1.00466e+08	1.29617e+08	6.17678e+07	5.83499e+07	6.74701e+07	0.84763	0.858343	0.881484	1.1376	1.19662	1.1994
Q53F19	Nuclear cap-binding protein subunit 3 OS=Homo sapiens OX=9606 GN=NCBP3 PE=1 SV=2	NCBP3	1.36387	0.000297144	None	7	4	7	4	4	70.5	1.01545e+07	9.71121e+06	1.20958e+07	6.04156e+06	5.61232e+06	6007057	0.972404	1.02075	1.01202	1.36892	1.41599	1.31376
O43505	Beta-1,4-glucuronyltransferase 1 OS=Homo sapiens OX=9606 GN=B4GAT1 PE=1 SV=1	B4GAT1	1.36272	0.107692	None	4	2	12	2	2	47.1	1.72808e+06	927425	1.62099e+06	743617	773819	820468	1.08386	0.638471	0.888284	1.10356	1.27871	1.17526
P04844	Dolichyl-diphosphooligosaccharide--protein glycosyltransferase subunit 2 OS=Homo sapiens OX=9606 GN=RPN2 PE=1 SV=3	RPN2	1.36247	0.00337486	None	55	23	545	23	23	69.2	3.62795e+08	2.86197e+08	4.08134e+08	1.92261e+08	1.766e+08	2.13651e+08	0.961881	0.832877	0.945427	1.20612	1.23361	1.29369
Q7Z449	Cytochrome P450 2U1 OS=Homo sapiens OX=9606 GN=CYP2U1 PE=1 SV=1	CYP2U1	1.36142	0.0660956	None	12	5	30	5	5	61.9	1.32899e+06	1.63324e+06	1.86358e+06	957956	686024	1.04757e+06	0.721363	0.973055	0.883779	1.23032	0.981067	1.29862
P78527	DNA-dependent protein kinase catalytic subunit OS=Homo sapiens OX=9606 GN=PRKDC PE=1 SV=3	PRKDC	1.3608	0.00215357	None	36	135	977	135	135	468.8	4.38313e+08	4.06051e+08	5.26088e+08	2.38768e+08	2.47339e+08	2.67893e+08	1.04237	1.05992	1.09311	1.34356	1.54974	1.45501
Q9BQB6	Vitamin K epoxide reductase complex subunit 1 OS=Homo sapiens OX=9606 GN=VKORC1 PE=1 SV=1	VKORC1	1.36048	0.428646	None	23	3	16	3	3	18.2	3.87015e+06		5.65962e+06	3.05821e+06	1.40561e+06	3.08667e+06	0.835163		1.06708	1.56154	0.799166	1.52124
O95786	Antiviral innate immune response receptor RIG-I OS=Homo sapiens OX=9606 GN=DDX58 PE=1 SV=2	DDX58	1.35975	0.0013376	None	39	34	301	34	34	106.5	8.29224e+07	8.31317e+07	1.03727e+08	4.9642e+07	4.43915e+07	5.50126e+07	0.795382	0.875238	0.869285	1.12666	1.12184	1.20512
Q9NTJ3	Structural maintenance of chromosomes protein 4 OS=Homo sapiens OX=9606 GN=SMC4 PE=1 SV=2	SMC4	1.35944	0.000949203	None	7	8	19	8	8	147.1	4.76854e+06	4.42301e+06	4.96013e+06	2.66111e+06	2.40882e+06	2.77196e+06	1.16561	1.1867	1.05932	1.53911	1.55131	1.54746
Q9NRW7	Vacuolar protein sorting-associated protein 45 OS=Homo sapiens OX=9606 GN=VPS45 PE=1 SV=1	VPS45	1.35854	0.00357911	None	25	12	101	12	12	65	1.65138e+07	1.59605e+07	2.14858e+07	1.04719e+07	8.47805e+06	1.07813e+07	0.843023	0.894327	0.958317	1.26491	1.14029	1.25698
P82675	28S ribosomal protein S5, mitochondrial OS=Homo sapiens OX=9606 GN=MRPS5 PE=1 SV=2	MRPS5	1.35815	0.00791159	None	26	12	73	12	12	48	2.00298e+07	1.80373e+07	2.32415e+07	1.09547e+07	9.54587e+06	1.33989e+07	1.04036	1.02834	1.05472	1.34632	1.30632	1.58943
Q92947	Glutaryl-CoA dehydrogenase, mitochondrial OS=Homo sapiens OX=9606 GN=GCDH PE=1 SV=1	GCDH	1.35663	0.00201608	None	35	9	51	9	9	48.1	7.90923e+07	6.85854e+07	9.27108e+07	4.78633e+07	3.78653e+07	4.65459e+07	1.04213	0.991921	1.0673	1.49222	1.31449	1.40067
O94905	Erlin-2 OS=Homo sapiens OX=9606 GN=ERLIN2 PE=1 SV=1	ERLIN2	1.35618	0.000635785	None	49	12	167	11	12	37.8	7.09597e+07	6.07573e+07	8.32572e+07	4.1112e+07	3.65472e+07	4.01785e+07	1.09156	1.02587	1.11898	1.49639	1.48121	1.41155
P52948	Nuclear pore complex protein Nup98-Nup96 OS=Homo sapiens OX=9606 GN=NUP98 PE=1 SV=4	NUP98	1.35517	0.213492	None	15	22	90	22	22	197.5	4.17176e+07	3.96791e+07	4.76455e+07	2.85295e+07	2.50516e+07	1.68409e+07	1.03526	1.08081	1.03304	1.6752	1.63792	0.954469
Q6RW13	Type-1 angiotensin II receptor-associated protein OS=Homo sapiens OX=9606 GN=AGTRAP PE=1 SV=1	AGTRAP	1.35479	0.0666705	None	35	4	29	4	4	17.4	4.62744e+06	3.2809e+06	4.09449e+06	2.43771e+06	1.68811e+06	2.53044e+06	0.909573	0.707857	0.703171	1.13376	0.874229	1.13595
O43181	NADH dehydrogenase [ubiquinone] iron-sulfur protein 4, mitochondrial OS=Homo sapiens OX=9606 GN=NDUFS4 PE=1 SV=1	NDUFS4	1.35429	0.00170147	None	11	2	31	2	2	20.1	6.20791e+06	5.62021e+06	6545743	3.34567e+06	3.29386e+06	3.46456e+06	1.01503	1.00866	0.935102	1.29437	1.41895	1.29375
Q14671	Pumilio homolog 1 OS=Homo sapiens OX=9606 GN=PUM1 PE=1 SV=3	PUM1	1.35408	0.196223	None	14	12	74	10	12	126.4	9.54594e+06	8.50511e+06	1.00735e+07	6.11526e+06	5.49329e+06	3.7402e+06	1.05969	1.03632	0.977019	1.60626	1.60664	0.948244
P14868	Aspartate--tRNA ligase, cytoplasmic OS=Homo sapiens OX=9606 GN=DARS1 PE=1 SV=2	DARS1	1.35343	0.0146031	None	56	27	362	27	27	57.1	2.51181e+08	2.18373e+08	227357938	1.26376e+08	1.21616e+08	1.37388e+08	1.03632	0.988923	0.819566	1.23372	1.32198	1.29456
O95477	Phospholipid-transporting ATPase ABCA1 OS=Homo sapiens OX=9606 GN=ABCA1 PE=1 SV=3	ABCA1	1.35327	0.0103063	None	12	23	115	22	23	254.1	5.37624e+07	5.53665e+07	7.05725e+07	3.36952e+07	3.27099e+07	3.17579e+07	0.712422	0.805307	0.81707	1.0565	1.142	0.961115
Q7LBC6	Lysine-specific demethylase 3B OS=Homo sapiens OX=9606 GN=KDM3B PE=1 SV=2	KDM3B	1.35198	0.272787	None	3	4	5	4	4	191.5	2.22685e+06	2.3771e+06	1.56799e+06	1.21751e+06	1.02964e+06		1.09382	1.28161	0.67292	1.41504	1.3325
Q9Y3D7	Mitochondrial import inner membrane translocase subunit TIM16 OS=Homo sapiens OX=9606 GN=PAM16 PE=1 SV=2	PAM16	1.349	0.327422	None	39	4	27	4	4	13.8	4.5295e+06	6.51552e+06	5.44212e+06	1.99299e+06	3147174	4.01278e+06	0.868342	1.37102	0.911536	0.904038	1.5896	1.75692
Q9BZM5	UL16-binding protein 2 OS=Homo sapiens OX=9606 GN=ULBP2 PE=1 SV=1	ULBP2	1.34748	0.454976	None	12	3	18	3	3	27.4	1.69991e+06	2.01409e+06	2.03181e+06	1.23701e+06	525540	1.46684e+06	1.14471	1.48869	1.19541	1.97098	0.9324	2.25588
P58335	Anthrax toxin receptor 2 OS=Homo sapiens OX=9606 GN=ANTXR2 PE=1 SV=5	ANTXR2	1.34721	0.18059	None	24	11	61	9	9	53.6	2.04838e+07	1.63652e+07	2.42179e+07	1.20978e+07	1.23904e+07	8.33321e+06	0.904732	0.793387	0.934566	1.26432	1.44186	0.840594
Q92545	Transmembrane protein 131 OS=Homo sapiens OX=9606 GN=TMEM131 PE=1 SV=3	TMEM131	1.34712	0.596214	None	5	6	23	6	6	205	1.68471e+06	1.31286e+06	3.50039e+06	751075	1.82352e+06	765878	0.75973	0.649842	1.37916	0.801415	2.16656	0.788784
Q5XKP0	MICOS complex subunit MIC13 OS=Homo sapiens OX=9606 GN=MICOS13 PE=1 SV=1	MICOS13	1.34709	0.463902	None	46	2	17	2	2	13.1	4.33812e+06	1.37806e+06	2908301	2.25193e+06	826894	1.66273e+06	1.34548	0.469136	0.788097	1.65261	0.675698	1.17778
P51659	Peroxisomal multifunctional enzyme type 2 OS=Homo sapiens OX=9606 GN=HSD17B4 PE=1 SV=3	HSD17B4	1.34665	2.21427e-05	None	53	29	448	29	29	79.6	1.74147e+08	1.59937e+08	1.9582e+08	9.87857e+07	9.03713e+07	1.00479e+08	0.966898	0.974695	0.949919	1.29778	1.32198	1.27411
Q9UIG0	Tyrosine-protein kinase BAZ1B OS=Homo sapiens OX=9606 GN=BAZ1B PE=1 SV=2	BAZ1B	1.3461	0.0130367	None	3	4	12	4	4	170.8	2034467	1.57246e+06	2.28017e+06	1.10867e+06	1.04914e+06	1.03171e+06	1.29865	1.10173	1.27167	1.6745	1.76442	1.50405
Q13868	Exosome complex component RRP4 OS=Homo sapiens OX=9606 GN=EXOSC2 PE=1 SV=2	EXOSC2	1.34415	0.0599228	None	32	7	44	7	7	32.8	6.47457e+06	7.65477e+06	8.05824e+06	4.86643e+06	3.38783e+06	3.94931e+06	1.02053	1.32435	1.10974	1.81496	1.40691	1.42168
Q9NZN3	EH domain-containing protein 3 OS=Homo sapiens OX=9606 GN=EHD3 PE=1 SV=2	EHD3	1.34398	0.0987317	None	47	20	214	7	7	60.8	9.08678e+06	1.14622e+07	9.49627e+06	5.01768e+06	5.07785e+06	6.57728e+06	0.886537	1.22747	0.809478	1.15833	1.30525	1.46554
P61019	Ras-related protein Rab-2A OS=Homo sapiens OX=9606 GN=RAB2A PE=1 SV=1	RAB2A	1.33987	0.0004719	None	65	13	276	6	14	23.5	1.06962e+08	9.56424e+07	1.30384e+08	6.05658e+07	5.66977e+07	6.3017e+07	0.99637	0.977905	1.06116	1.33493	1.3915	1.34064
P13674	Prolyl 4-hydroxylase subunit alpha-1 OS=Homo sapiens OX=9606 GN=P4HA1 PE=1 SV=2	P4HA1	1.33959	0.000493789	None	60	30	590	30	30	61	2.59254e+08	2.27364e+08	2.81145e+08	1.38013e+08	1.33769e+08	1.45221e+08	0.777936	0.748852	0.737077	0.979895	1.05755	0.995203
O00560	Syntenin-1 OS=Homo sapiens OX=9606 GN=SDCBP PE=1 SV=1	SDCBP	1.33917	0.0999554	None	11	3	36	3	3	32.4	4.51095e+06	4.85999e+06	5.06424e+06	2.09669e+06	2.67725e+06	3.10675e+06	0.790279	0.93455	0.77516	0.869134	1.23575	1.24303
Q96I99	Succinate--CoA ligase [GDP-forming] subunit beta, mitochondrial OS=Homo sapiens OX=9606 GN=SUCLG2 PE=1 SV=2	SUCLG2	1.3384	0.000329297	None	41	15	249	15	15	46.5	7.93898e+07	7.77428e+07	9.47791e+07	4.79302e+07	4.17305e+07	4.72631e+07	0.952375	1.02367	0.993392	1.36048	1.31894	1.29488
Q6P179	Endoplasmic reticulum aminopeptidase 2 OS=Homo sapiens OX=9606 GN=ERAP2 PE=1 SV=2	ERAP2	1.33832	0.0175704	None	22	19	119	19	19	110.4	1.87067e+07	1.75253e+07	2.66601e+07	1.09834e+07	1.02573e+07	1.2672e+07	0.839272	0.86303	1.04504	1.16596	1.21245	1.29842
Q8NBZ7	UDP-glucuronic acid decarboxylase 1 OS=Homo sapiens OX=9606 GN=UXS1 PE=1 SV=1	UXS1	1.33755	0.0653205	None	20	5	28	5	5	47.5	2.71944e+06	3156596	3.25295e+06	1.97775e+06	1.49091e+06	1.51741e+06	0.836823	1.06618	0.874574	1.44001	1.20874	1.0664
Q96KC2	ADP-ribosylation factor-like protein 5B OS=Homo sapiens OX=9606 GN=ARL5B PE=1 SV=1	ARL5B	1.33522	0.042834	None	15	2	12	2	2	20.4	1.50582e+06	1.32326e+06	1.96998e+06	972988	830074	770143	0.881359	0.850123	1.00741	1.3475	1.28004	1.02948
Q99459	Cell division cycle 5-like protein OS=Homo sapiens OX=9606 GN=CDC5L PE=1 SV=2	CDC5L	1.3332	0.118833	None	25	14	76	14	14	92.2	5.03927e+07	6.5084e+07	8.66395e+07	3.20343e+07	3.33027e+07	4.37002e+07	0.778133	1.1031	1.16887	1.17042	1.35486	1.54112
Q9P035	Very-long-chain (3R)-3-hydroxyacyl-CoA dehydratase 3 OS=Homo sapiens OX=9606 GN=HACD3 PE=1 SV=2	HACD3	1.33093	0.0128766	None	22	6	117	6	6	43.1	5.39942e+07	4.08855e+07	5.9224e+07	2.62063e+07	2.659e+07	2.99471e+07	1.03229	0.857985	0.989275	1.1855	1.33937	1.3076
P16435	NADPH--cytochrome P450 reductase OS=Homo sapiens OX=9606 GN=POR PE=1 SV=2	POR	1.33091	1.88316e-05	None	43	24	288	24	24	76.6	5.45882e+07	4.90092e+07	6.17625e+07	2.99209e+07	2.79168e+07	3.14018e+07	1.00207	0.987495	0.990583	1.29962	1.35019	1.3165
P30084	Enoyl-CoA hydratase, mitochondrial OS=Homo sapiens OX=9606 GN=ECHS1 PE=1 SV=4	ECHS1	1.32987	0.00583987	None	42	13	209	13	13	31.4	9.14557e+07	7.45619e+07	1.07401e+08	4.72907e+07	47584693	5.16619e+07	0.999744	0.894645	1.02577	1.22319	1.37048	1.28977
O60831	PRA1 family protein 2 OS=Homo sapiens OX=9606 GN=PRAF2 PE=1 SV=1	PRAF2	1.32966	0.0107228	None	22	3	40	3	3	19.2	3.17114e+07	2.92536e+07	3.30233e+07	1.75586e+07	14096277	1.95018e+07	0.938773	0.950562	0.854143	1.22992	1.09946	1.31851
Q9BTZ2	Dehydrogenase/reductase SDR family member 4 OS=Homo sapiens OX=9606 GN=DHRS4 PE=1 SV=3	DHRS4	1.32884	0.00607577	None	36	8	132	5	7	29.5	1.99377e+07	2.0361e+07	2.73067e+07	1.21606e+07	1.10306e+07	1.31618e+07	0.933383	1.04626	1.11691	1.34704	1.36054	1.40723
P52294	Importin subunit alpha-5 OS=Homo sapiens OX=9606 GN=KPNA1 PE=1 SV=3	KPNA1	1.32586	0.207078	None	20	10	66	5	5	60.2	1.91626e+06	1.48379e+06	1.83024e+06	1.28252e+06	674568	879367	1.07821	0.91638	0.899747	1.70747	1	1.13001
Q15005	Signal peptidase complex subunit 2 OS=Homo sapiens OX=9606 GN=SPCS2 PE=1 SV=3	SPCS2	1.32516	0.00195436	None	42	9	180	9	9	25	5.33766e+07	5.01332e+07	6.48919e+07	3.22908e+07	2.58389e+07	3.25346e+07	0.901032	0.928903	0.957071	1.28976	1.14918	1.25429
Q16891	MICOS complex subunit MIC60 OS=Homo sapiens OX=9606 GN=IMMT PE=1 SV=1	IMMT	1.32477	0.0896889	None	55	37	476	37	37	83.6	1.91461e+08	1.88342e+08	2.18406e+08	9.51867e+07	8.76979e+07	141876961	0.998695	1.07834	0.995366	1.17482	1.20523	1.69017
Q96A35	39S ribosomal protein L24, mitochondrial OS=Homo sapiens OX=9606 GN=MRPL24 PE=1 SV=1	MRPL24	1.32309	0.0462814	None	58	10	43	10	10	24.9	1.28194e+07	1.26364e+07	1.22158e+07	7.53282e+06	6.47097e+06	6.37575e+06	1.20715	1.30608	1.00503	1.67838	1.60542	1.37116
P27701	CD82 antigen OS=Homo sapiens OX=9606 GN=CD82 PE=1 SV=1	CD82	1.32302	0.0183808	None	22	5	49	5	5	29.6	6.26994e+06	4.44883e+06	6557414	3.11818e+06	2.78171e+06	3.3403e+06	0.777484	0.605523	0.710438	0.914894	0.908798	0.945975
P28482	Mitogen-activated protein kinase 1 OS=Homo sapiens OX=9606 GN=MAPK1 PE=1 SV=3	MAPK1	1.32288	0.00223788	None	49	16	207	10	10	41.4	5.27331e+07	4.86867e+07	5.99424e+07	2.73824e+07	2.68777e+07	3.24588e+07	0.958834	0.971686	0.952268	1.17807	1.2876	1.3479
Q9NR50	Translation initiation factor eIF-2B subunit gamma OS=Homo sapiens OX=9606 GN=EIF2B3 PE=1 SV=1	EIF2B3	1.32165	0.196802	None	31	11	73	11	11	50.2	1.35861e+07	1.17017e+07	1.85981e+07	6.51031e+06	9.43468e+06	7.06962e+06	1.0142	0.958815	1.213	1.14993	1.8556	1.20529
P42126	Enoyl-CoA delta isomerase 1, mitochondrial OS=Homo sapiens OX=9606 GN=ECI1 PE=1 SV=1	ECI1	1.32116	0.0160669	None	29	7	82	7	7	32.8	3.32406e+07	2.51478e+07	3.44043e+07	1.74858e+07	1.59985e+07	1.60136e+07	1.22639	1.0184	1.10902	1.52646	1.55513	1.34932
Q5T9L3	Protein wntless homolog OS=Homo sapiens OX=9606 GN=WLS PE=1 SV=2	WLS	1.32075	0.170111	None	12	8	72	8	8	62.2	1.30227e+07	1.32603e+07	9.54876e+06	6.51829e+06	6.70646e+06	6.28305e+06	0.763327	0.853138	0.489013	0.90403	1.03569	0.841094
P45880	Voltage-dependent anion-selective channel protein 2 OS=Homo sapiens OX=9606 GN=VDAC2 PE=1 SV=2	VDAC2	1.3203	0.000567686	None	69	14	447	14	14	31.5	3.12056e+08	2.9569e+08	3.48596e+08	1.69204e+08	1.56448e+08	1.88321e+08	0.995141	1.03501	0.97127	1.27675	1.31446	1.37156
P28331	NADH-ubiquinone oxidoreductase 75 kDa subunit, mitochondrial OS=Homo sapiens OX=9606 GN=NDUFS1 PE=1 SV=3	NDUFS1	1.32016	0.00949792	None	43	26	348	26	26	79.4	1.07487e+08	9.32888e+07	1.32399e+08	6.37805e+07	4.93599e+07	6.51666e+07	0.944914	0.900168	1.01692	1.32668	1.14325	1.30836
P53680	AP-2 complex subunit sigma OS=Homo sapiens OX=9606 GN=AP2S1 PE=1 SV=2	AP2S1	1.31995	0.0142765	None	30	4	55	4	4	17	2.91593e+07	2.5908e+07	3.22931e+07	1.66283e+07	1.25495e+07	1.78902e+07	0.945565	0.922154	0.91493	1.27586	1.07218	1.32493
O95573	Fatty acid CoA ligase Acsl3 OS=Homo sapiens OX=9606 GN=ACSL3 PE=1 SV=3	ACSL3	1.3193	0.00227584	None	33	19	264	18	19	80.4	9.16973e+07	7.95845e+07	1.08631e+08	5.05118e+07	4.33961e+07	5.58652e+07	1.0337	0.984738	1.06993	1.34732	1.28889	1.43828
Q12996	Cleavage stimulation factor subunit 3 OS=Homo sapiens OX=9606 GN=CSTF3 PE=1 SV=1	CSTF3	1.31919	0.000717874	None	18	10	46	10	10	82.9	1.12524e+07	1.03133e+07	14099946	6.52058e+06	5.84404e+06	6.65685e+06	1.08152	1.08804	1.18406	1.48292	1.4799	1.46125
O14727	Apoptotic protease-activating factor 1 OS=Homo sapiens OX=9606 GN=APAF1 PE=1 SV=2	APAF1	1.31885	0.435361	None	11	9	20	9	9	141.7	1.44376e+06	1.90926e+06	3.18474e+06	1.02715e+06	1.53887e+06	811321	0.527916	0.766284	1.01743	0.888672	1.48251	0.677526
Q96HH9	GRAM domain-containing protein 2B OS=Homo sapiens OX=9606 GN=GRAMD2B PE=1 SV=1	GRAMD2B	1.31877	0.216985	None	5	2	7	2	2	47.8	1.41441e+06	845684	1.41575e+06	523361	565512	872384	1.01711	0.667511	0.889496	0.890505	1.07143	1.43274
P20337	Ras-related protein Rab-3B OS=Homo sapiens OX=9606 GN=RAB3B PE=1 SV=2	RAB3B	1.31821	0.028584	None	26	5	70	3	3	24.7	1.08398e+07	9.28589e+06	1.242e+07	5.85636e+06	4.62804e+06	6.99657e+06	1.32404	1.24497	1.32545	1.69257	1.48937	1.95177
Q06787	Synaptic functional regulator FMR1 OS=Homo sapiens OX=9606 GN=FMR1 PE=1 SV=1	FMR1	1.31651	0.0979117	None	13	8	49	6	6	71.1	5.90172e+06	6.44411e+06	6.59934e+06	4.24773e+06	2.80776e+06	3.16322e+06	0.900299	1.07901	0.879577	1.53322	1.12849	1.10205
Q9C0H2	Protein tweety homolog 3 OS=Homo sapiens OX=9606 GN=TTYH3 PE=1 SV=3	TTYH3	1.31633	0.00207024	None	12	5	22	5	5	57.5	6.30174e+06	5639446	7.86191e+06	3.61773e+06	3.33035e+06	3.56889e+06	0.707651	0.695105	0.77135	0.961248	0.985317	0.915285
P21912	Succinate dehydrogenase [ubiquinone] iron-sulfur subunit, mitochondrial OS=Homo sapiens OX=9606 GN=SDHB PE=1 SV=3	SDHB	1.31513	0.171957	None	47	14	161	14	14	31.6	5.72945e+07	5.78332e+07	6.34176e+07	4.26882e+07	2.3917e+07	2.9635e+07	0.92383	1.02356	0.893417	1.62865	1.01605	1.09131
P55809	Succinyl-CoA:3-ketoacid coenzyme A transferase 1, mitochondrial OS=Homo sapiens OX=9606 GN=OXCT1 PE=1 SV=1	OXCT1	1.31392	0.0104176	None	34	12	162	12	12	56.1	4.77865e+07	4.24296e+07	4.72417e+07	2.5859e+07	2.36108e+07	2.40032e+07	1.07826	1.05085	0.93134	1.38061	1.40364	1.23695
Q14766	Latent-transforming growth factor beta-binding protein 1 OS=Homo sapiens OX=9606 GN=LTBP1 PE=1 SV=4	LTBP1	1.31241	0.214103	None	4	5	28	5	5	186.7	2.97566e+06	1.55753e+06	3.522e+06	1.26919e+06	1.26675e+06	1.68441e+06	1.08376	0.622649	1.12074	1.09375	1.21554	1.40108
Q16181	Septin-7 OS=Homo sapiens OX=9606 GN=SEPTIN7 PE=1 SV=2	SEPTIN7	1.31236	0.00698367	None	50	20	374	19	20	50.6	1.84027e+08	1.71591e+08	1.84239e+08	1.00759e+08	9.04752e+07	9.77092e+07	0.976592	0.9995	0.854237	1.2652	1.265	1.18422
P04179	Superoxide dismutase [Mn], mitochondrial OS=Homo sapiens OX=9606 GN=SOD2 PE=1 SV=3	SOD2	1.31119	0.00109205	None	57	11	472	11	11	24.7	1.6759e+08	1.67699e+08	2.00261e+08	9.47707e+07	9.02931e+07	9.9998e+07	0.408732	0.448929	0.42673	0.546898	0.580195	0.556991
Q92990	Glomulin OS=Homo sapiens OX=9606 GN=GLMN PE=1 SV=2	GLMN	1.31019	0.0828458	None	5	2	5	2	2	68.2	270563	256890	395561		140190	181768	0.929677	0.968871	1.18752		1.26914	1.42641
Q9BPX5	Actin-related protein 2/3 complex subunit 5-like protein OS=Homo sapiens OX=9606 GN=ARPC5L PE=1 SV=1	ARPC5L	1.31014	0.0695972	None	59	5	81	4	4	16.9	1.77935e+07	1.61409e+07	2.33635e+07	1.11532e+07	1.02133e+07	8.74316e+06	0.895147	0.891284	1.02692	1.32762	1.35371	1.00454
O95169	NADH dehydrogenase [ubiquinone] 1 beta subcomplex subunit 8, mitochondrial OS=Homo sapiens OX=9606 GN=NDUFB8 PE=1 SV=1	NDUFB8	1.30913	0.0027658	None	28	5	78	5	5	21.8	1.6482e+07	1.41388e+07	1.96457e+07	8.62998e+06	8.55847e+06	9.36826e+06	0.949229	0.89378	0.98854	1.17602	1.29863	1.23221
Q15113	Procollagen C-endopeptidase enhancer 1 OS=Homo sapiens OX=9606 GN=PCOLCE PE=1 SV=2	PCOLCE	1.30908	0.037668	None	20	6	66	6	6	47.9	8.47456e+06	7.48639e+06	1.0771e+07	4339575	4.99476e+06	4.7037e+06	1.00121	0.970814	1.1118	1.2131	1.55471	1.26915
O75369	Filamin-B OS=Homo sapiens OX=9606 GN=FLNB PE=1 SV=2	FLNB	1.30856	0.00139057	None	64	125	2258	113	113	278	2.06632e+09	1.84613e+09	2.38696e+09	1.12185e+09	9.73279e+08	1.25482e+09	1.02321	1.00342	1.0327	1.31444	1.26979	1.4191
Q9NUM4	Transmembrane protein 106B OS=Homo sapiens OX=9606 GN=TMEM106B PE=1 SV=2	TMEM106B	1.30771	0.00416218	None	19	4	40	4	4	31.1	6.33915e+06	5.59531e+06	7.03945e+06	3.29669e+06	3.35904e+06	3.37751e+06	0.792151	0.767463	0.768566	0.974756	1.10591	0.963914
P31040	Succinate dehydrogenase [ubiquinone] flavoprotein subunit, mitochondrial OS=Homo sapiens OX=9606 GN=SDHA PE=1 SV=2	SDHA	1.30667	1.27984e-05	None	42	20	275	20	20	72.6	1.95993e+08	1.76085e+08	2.23032e+08	1.06297e+08	9.58611e+07	1.13491e+08	1.01163	0.997602	1.0058	1.29819	1.30361	1.33784
O00165	HCLS1-associated protein X-1 OS=Homo sapiens OX=9606 GN=HAX1 PE=1 SV=2	HAX1	1.3049	0.0855233	None	8	2	6	2	2	31.6	210705	287576	293460	133631	131877	156654	0.802406	1.20206	0.976412	1.20411	1.32317	1.36247
P16615	Sarcoplasmic/endoplasmic reticulum calcium ATPase 2 OS=Homo sapiens OX=9606 GN=ATP2A2 PE=1 SV=1	ATP2A2	1.30489	0.00033867	None	45	45	822	45	45	114.7	5.91253e+08	5.30919e+08	6.31797e+08	3.23979e+08	2.81991e+08	3.25206e+08	0.957419	0.943653	0.893862	1.24133	1.20307	1.20268
P36543	V-type proton ATPase subunit E 1 OS=Homo sapiens OX=9606 GN=ATP6V1E1 PE=1 SV=1	ATP6V1E1	1.3043	0.0216465	None	46	11	105	11	11	26.1	6.795e+07	5.91858e+07	8.07425e+07	4.00607e+07	3.55361e+07	3.36958e+07	0.795874	0.7609	0.826269	1.11023	1.09661	0.901354
Q9UJS0	Calcium-binding mitochondrial carrier protein Aralar2 OS=Homo sapiens OX=9606 GN=SLC25A13 PE=1 SV=2	SLC25A13	1.30416	0.0476893	None	42	24	219	18	24	74.1	3.38698e+07	2.89672e+07	3.97547e+07	2.04153e+07	1.38195e+07	2.02382e+07	0.90164	0.846413	0.924643	1.28593	0.969257	1.23043
P01034	Cystatin-C OS=Homo sapiens OX=9606 GN=CST3 PE=1 SV=1	CST3	1.30314	0.0216208	None	42	4	39	4	4	15.8	2.61026e+06	2.85524e+06	3.8201e+06	1.66992e+06	1.48555e+06	1.73822e+06	0.750946	0.90162	0.960208	1.13674	1.126	1.14208
Q9NZ08	Endoplasmic reticulum aminopeptidase 1 OS=Homo sapiens OX=9606 GN=ERAP1 PE=1 SV=3	ERAP1	1.30277	0.000619079	None	39	30	327	30	30	107.2	6.86749e+07	6.12295e+07	7.97554e+07	3.77711e+07	3.24012e+07	4.07499e+07	0.923165	0.903436	0.936712	1.20138	1.14754	1.25104
P56556	NADH dehydrogenase [ubiquinone] 1 alpha subcomplex subunit 6 OS=Homo sapiens OX=9606 GN=NDUFA6 PE=1 SV=4	NDUFA6	1.30227	0.00176758	None	41	6	71	6	6	15.1	1.96621e+07	1.87938e+07	2.29836e+07	1.07385e+07	1.06064e+07	1.10633e+07	0.963578	1.01095	0.984101	1.24521	1.36947	1.23824
P18206	Vinculin OS=Homo sapiens OX=9606 GN=VCL PE=1 SV=4	VCL	1.30225	0.00177133	None	59	60	1221	60	60	123.7	7.68163e+08	6.843e+08	8.59456e+08	4.26643e+08	3.90112e+08	4.02403e+08	0.963583	0.942189	0.941941	1.26631	1.2893	1.15282
Q08499	cAMP-specific 3',5'-cyclic phosphodiesterase 4D OS=Homo sapiens OX=9606 GN=PDE4D PE=1 SV=2	PDE4D	1.30214	0.0506205	None	8	4	17	4	4	91.1	1.26636e+06	1.2967e+06	1.34683e+06	669000	736166	662067	0.688696	0.774043	0.639954	0.86087	1.05481	0.822314
Q7Z3U7	Protein MON2 homolog OS=Homo sapiens OX=9606 GN=MON2 PE=1 SV=3	MON2	1.30212	0.177307	None	11	17	108	17	17	190.2	1.51233e+07	2.48968e+07	1.93315e+07	1.11368e+07	9.48352e+06	1.13543e+07	0.806109	1.45661	0.900278	1.40458	1.33181	1.3822
Q9ULQ1	Two pore channel protein 1 OS=Homo sapiens OX=9606 GN=TPCN1 PE=1 SV=3	TPCN1	1.3018	0.182577	None	8	6	16	6	6	94.1	1.81053e+06	2.16231e+06	2.34075e+06	1.22119e+06	772937	1.39374e+06	0.478805	0.627663	0.540845	0.764149	0.538549	0.84178
Q9Y2G8	DnaJ homolog subfamily C member 16 OS=Homo sapiens OX=9606 GN=DNAJC16 PE=2 SV=3	DNAJC16	1.30093	0.677564	None	8	5	12	5	5	90.5	641296	929217	694334	596282		243454	0.775009	1.2326	0.733131	1.70507		0.671941
P10915	Hyaluronan and proteoglycan link protein 1 OS=Homo sapiens OX=9606 GN=HAPLN1 PE=2 SV=2	HAPLN1	1.30038	0.217149	None	14	4	16	4	4	40.1	3.20715e+06	3.78077e+06	4.98092e+06	2779406	1.56823e+06	1.97814e+06	0.857542	1.10962	1.16362	1.75844	1.10478	1.20798
P28838	Cytosol aminopeptidase OS=Homo sapiens OX=9606 GN=LAP3 PE=1 SV=3	LAP3	1.30034	0.0038587	None	52	23	334	23	23	56.1	2.01342e+08	1.86079e+08	2.22048e+08	1.05625e+08	9.42558e+07	1.23221e+08	1.00227	1.01672	0.965741	1.24411	1.23619	1.40087
Q9Y2G5	GDP-fucose protein O-fucosyltransferase 2 OS=Homo sapiens OX=9606 GN=POFUT2 PE=1 SV=3	POFUT2	1.29923	0.00493152	None	48	18	213	18	18	49.9	4.77938e+07	4.89905e+07	6.29459e+07	2.90375e+07	2.48555e+07	3.03079e+07	0.809446	0.910717	0.931425	1.16363	1.10909	1.1723
P54802	Alpha-N-acetylglucosaminidase OS=Homo sapiens OX=9606 GN=NAGLU PE=1 SV=2	NAGLU	1.29821	0.048611	None	20	10	60	10	10	82.2	7.24945e+06	5.20076e+06	8.89773e+06	3.66214e+06	3.54129e+06	3.9053e+06	0.707909	0.557436	0.75913	0.84615	0.91109	0.870947
Q92633	Lysophosphatidic acid receptor 1 OS=Homo sapiens OX=9606 GN=LPAR1 PE=1 SV=3	LPAR1	1.29709	0.101898	None	21	8	36	8	8	41.1	2.77739e+07	2.46836e+07	2.77454e+07	1.51128e+07	1.50092e+07	1.19568e+07	0.923705	0.901073	0.806216	1.18927	1.31517	0.908192
P36957	Dihydrolipoyllysine-residue succinyltransferase component of 2-oxoglutarate dehydrogenase complex, mitochondrial OS=Homo sapiens OX=9606 GN=DLST PE=1 SV=4	DLST	1.29603	1.52946e-05	None	34	13	222	13	13	48.7	1.17644e+08	1.08869e+08	1.32561e+08	6.47361e+07	5.7282e+07	6.71469e+07	1.01499	1.03098	0.99924	1.32153	1.30207	1.32306
Q9UGV2	Protein NDRG3 OS=Homo sapiens OX=9606 GN=NDRG3 PE=1 SV=2	NDRG3	1.29595	0.153321	None	32	6	55	6	6	41.4	7.05738e+06	7.37984e+06	5.61134e+06	3.87672e+06	2.96562e+06	3.94547e+06	1.08181	1.24168	0.751516	1.40609	1.1977	1.38125
Q9H6K4	Optic atrophy 3 protein OS=Homo sapiens OX=9606 GN=OPA3 PE=1 SV=1	OPA3	1.2954	0.422534	None	33	5	29	5	5	20	1.71072e+06	3.41852e+06	1.79968e+06	1.53885e+06	1328965	863061	0.578296	1.26842	0.531534	1.23086	1.18362	0.666311
Q9H0R3	Transmembrane protein 222 OS=Homo sapiens OX=9606 GN=TMEM222 PE=1 SV=2	TMEM222	1.29539	0.253203	None	29	3	16	3	3	23.2	3.05324e+06	2.16796e+06	3.3138e+06	1.37778e+06	1.04871e+06	2086467	1.00424	0.782682	0.952289	1.07225	0.908782	1.56731
Q96P16	Regulation of nuclear pre-mRNA domain-containing protein 1A OS=Homo sapiens OX=9606 GN=RPRD1A PE=1 SV=1	RPRD1A	1.2953	0.409518	None	19	5	16	3	3	35.7	1.51312e+06	5.68808e+06	5910642	2.7497e+06	1.86225e+06	2330996	0.321753	1.32761	1.09812	1.38349	1.04331	1.13202
Q9Y263	Phospholipase A-2-activating protein OS=Homo sapiens OX=9606 GN=PLAA PE=1 SV=2	PLAA	1.29305	0.0139552	None	37	21	132	21	21	87.1	1.27898e+08	1.34732e+08	1.78266e+08	7.86559e+07	6.81367e+07	8.42303e+07	0.808972	0.935398	0.985151	1.17718	1.13547	1.21675
O00116	Alkyldihydroxyacetonephosphate synthase, peroxisomal OS=Homo sapiens OX=9606 GN=AGPS PE=1 SV=1	AGPS	1.29297	0.00182778	None	46	22	221	22	22	72.9	8.11709e+07	7.00076e+07	8.71708e+07	4.27239e+07	3.6378e+07	4.63453e+07	1.05418	0.997966	0.989125	1.31289	1.24475	1.37463
P47895	Aldehyde dehydrogenase family 1 member A3 OS=Homo sapiens OX=9606 GN=ALDH1A3 PE=1 SV=2	ALDH1A3	1.29275		None	10	6	69	3	3	56.1	1.55111e+06	1.01161e+06	1.51006e+06		651085		1.09331	0.782653	0.929951		1.20911
Q00610	Clathrin heavy chain 1 OS=Homo sapiens OX=9606 GN=CLTC PE=1 SV=5	CLTC	1.29213	0.000273079	None	66	87	2178	69	90	191.5	1.32649e+09	1.14765e+09	1.50045e+09	7.0137e+08	6.25905e+08	7.56193e+08	0.947306	0.899603	0.936207	1.18515	1.17766	1.23334
Q86UV5	Ubiquitin carboxyl-terminal hydrolase 48 OS=Homo sapiens OX=9606 GN=USP48 PE=1 SV=1	USP48	1.29154	0.467546	None	1	2	3	2	2	119	1.83303e+06	269899	387347	690994	211891	435187	2.12825	0.343962	0.392933	1.89832	0.648176	1.15397
O60783	28S ribosomal protein S14, mitochondrial OS=Homo sapiens OX=9606 GN=MRPS14 PE=1 SV=1	MRPS14	1.29152	0.0499664	None	17	2	27	2	2	15.1	3.5857e+06	3.95799e+06	3.92911e+06	1887150	2.06538e+06	2.08799e+06	1.06767	1.29357	1.02216	1.32956	1.62028	1.41989
O14657	Torsin-1B OS=Homo sapiens OX=9606 GN=TOR1B PE=1 SV=2	TOR1B	1.29129	0.0553719	None	24	7	64	7	7	38	6.52151e+06	7.02843e+06	9.66898e+06	4.37499e+06	3.90898e+06	3.78343e+06	0.954921	1.12962	1.23699	1.51578	1.50803	1.26523
Q9NSE4	Isoleucine--tRNA ligase, mitochondrial OS=Homo sapiens OX=9606 GN=IARS2 PE=1 SV=2	IARS2	1.29076	0.00229863	None	37	28	335	28	28	113.7	7.88837e+07	6.77508e+07	8.7275e+07	3.96545e+07	3.98035e+07	4.27057e+07	0.985452	0.929006	0.952583	1.17215	1.31008	1.21843
Q9BXF6	Rab11 family-interacting protein 5 OS=Homo sapiens OX=9606 GN=RAB11FIP5 PE=1 SV=1	RAB11FIP5	1.29073	0.303804	None	19	8	91	8	8	70.4	8.638e+06	8.03973e+06	1.0088e+07	4.69394e+06	2.97374e+06	6.55676e+06	0.990279	1.01168	1.01045	1.27328	0.898203	1.71672
O95965	Integrin beta-like protein 1 OS=Homo sapiens OX=9606 GN=ITGBL1 PE=2 SV=1	ITGBL1	1.29061	0.401705	None	7	2	5	2	2	53.9	490217	592906	1.27387e+06	448003		385018	0.692394	0.919192	1.57201	1.49722		1.24197
P32119	Peroxiredoxin-2 OS=Homo sapiens OX=9606 GN=PRDX2 PE=1 SV=5	PRDX2	1.29043	0.00493126	None	70	13	346	12	12	21.9	2.46091e+08	2.49645e+08	2.76468e+08	1.33521e+08	1.2339e+08	1.49681e+08	0.906987	1.00992	0.890258	1.16439	1.19816	1.25991
O75970	Multiple PDZ domain protein OS=Homo sapiens OX=9606 GN=MPDZ PE=1 SV=2	MPDZ	1.28959	0.115957	None	5	8	26	8	8	221.5	4.14863e+06	3.70254e+06	4.25994e+06	2.60019e+06	1.56182e+06	2.24332e+06	1.10106	1.0786	0.987813	1.63287	1.09211	1.35976
Q9BRY0	Zinc transporter ZIP3 OS=Homo sapiens OX=9606 GN=SLC39A3 PE=1 SV=2	SLC39A3	1.28921		None	10	2	5	2	2	33.6			566472		270637	246558			0.91625		1.32003	1.04245
P51159	Ras-related protein Rab-27A OS=Homo sapiens OX=9606 GN=RAB27A PE=1 SV=3	RAB27A	1.28878	0.0199745	None	40	7	51	5	7	24.9	6.75557e+07	5.34324e+07	7.20624e+07	37516142	2.79863e+07	3.55938e+07	1.10017	0.955121	1.02535	1.44563	1.2008	1.32385
Q99442	Translocation protein SEC62 OS=Homo sapiens OX=9606 GN=SEC62 PE=1 SV=1	SEC62	1.2879	0.0715992	None	14	7	149	7	7	45.8	2.74638e+07	3.0253e+07	3.56673e+07	1.95317e+07	1.3206e+07	1.63163e+07	0.783916	0.947837	0.889495	1.31913	0.99313	1.06364
P61026	Ras-related protein Rab-10 OS=Homo sapiens OX=9606 GN=RAB10 PE=1 SV=1	RAB10	1.28734	0.00212633	None	68	15	359	11	15	22.5	5.56747e+08	5.44075e+08	6.05227e+08	3.04654e+08	2.77648e+08	3.12579e+08	1.00389	1.07682	0.953483	1.2998	1.31902	1.28722
Q9UMZ2	Synergin gamma OS=Homo sapiens OX=9606 GN=SYNRG PE=1 SV=2	SYNRG	1.28651		None	2	2	12	2	2	140.6	899018	947126	1.321e+06			580732	0.644126	0.744845	0.826935			0.950262
Q99735	Microsomal glutathione S-transferase 2 OS=Homo sapiens OX=9606 GN=MGST2 PE=1 SV=1	MGST2	1.28508	0.0395952	None	18	2	25	2	2	16.6	5.9736e+06	5.33366e+06	5.30498e+06	3133643	2.6088e+06	3.00736e+06	0.921222	0.902837	0.714787	1.14345	1.05998	1.0592
O15270	Serine palmitoyltransferase 2 OS=Homo sapiens OX=9606 GN=SPTLC2 PE=1 SV=1	SPTLC2	1.283	0.118933	None	25	10	93	10	10	62.9	1.45284e+07	1.25562e+07	1.29421e+07	6.18175e+06	6.04872e+06	8.87395e+06	1.37084	1.30041	1.06694	1.38013	1.50369	1.91227
Q96CS3	FAS-associated factor 2 OS=Homo sapiens OX=9606 GN=FAF2 PE=1 SV=2	FAF2	1.28201	0.0189366	None	53	16	206	16	16	52.6	4.85856e+07	4.3141e+07	6.6654e+07	2.81102e+07	2.53858e+07	2.81358e+07	0.900205	0.877364	1.07901	1.23236	1.23923	1.19058
P31930	Cytochrome b-c1 complex subunit 1, mitochondrial OS=Homo sapiens OX=9606 GN=UQCRC1 PE=1 SV=3	UQCRC1	1.28176	0.0186541	None	54	18	337	17	18	52.6	1.744e+08	1.55121e+08	1.87327e+08	8.13961e+07	8.42473e+07	1.03775e+08	1.04264	1.01793	0.978485	1.15142	1.327	1.41693
Q9NVI7	ATPase family AAA domain-containing protein 3A OS=Homo sapiens OX=9606 GN=ATAD3A PE=1 SV=2	ATAD3A	1.28092	0.00100579	None	43	26	322	9	26	71.3	1.38412e+08	1.2552e+08	1.61555e+08	7.15163e+07	7.066e+07	78460036	1.01277	1.00811	1.03282	1.23818	1.3622	1.31115
O14920	Inhibitor of nuclear factor kappa-B kinase subunit beta OS=Homo sapiens OX=9606 GN=IKBKB PE=1 SV=1	IKBKB	1.28035	0.0266616	None	3	3	16	2	2	86.5	1.07755e+06	932298	1.251e+06	505845	523801	662182	1.06469	1.01111	1.07997	1.18262	1.36358	1.49427
Q9UIQ6	Leucyl-cystinyl aminopeptidase OS=Homo sapiens OX=9606 GN=LNPEP PE=1 SV=3	LNPEP	1.28021	0.0152767	None	28	22	219	22	22	117.3	2.81224e+07	2.42456e+07	3.20926e+07	1.41687e+07	1.2518e+07	1.72792e+07	0.972322	0.920125	0.969458	1.15913	1.1403	1.36442
P57088	Transmembrane protein 33 OS=Homo sapiens OX=9606 GN=TMEM33 PE=1 SV=2	TMEM33	1.28009	0.000869007	None	36	10	120	10	10	28	3.28201e+07	2.81537e+07	3.81411e+07	1.79462e+07	1.57493e+07	1.76328e+07	1.00516	0.946423	1.02059	1.30049	1.27082	1.23333
Q10471	Polypeptide N-acetylgalactosaminyltransferase 2 OS=Homo sapiens OX=9606 GN=GALNT2 PE=1 SV=1	GALNT2	1.28001	0.0133333	None	53	25	392	24	26	64.7	2.40533e+08	1.93604e+08	2.82934e+08	1.2192e+08	1.09123e+08	1.40259e+08	1.07386	0.948732	1.10363	1.28793	1.28356	1.43012
P59998	Actin-related protein 2/3 complex subunit 4 OS=Homo sapiens OX=9606 GN=ARPC4 PE=1 SV=3	ARPC4	1.27811	0.000937126	None	69	10	263	10	10	19.7	1.71001e+08	1.55647e+08	2.01768e+08	9.16435e+07	8.09347e+07	1.01649e+08	0.944153	0.94328	0.973331	1.19725	1.17735	1.28178
P17655	Calpain-2 catalytic subunit OS=Homo sapiens OX=9606 GN=CAPN2 PE=1 SV=6	CAPN2	1.27807	0.0107373	None	42	26	405	26	26	79.9	2.21174e+08	1.75229e+08	2.63865e+08	1.15085e+08	1.05175e+08	1.19856e+08	1.08391	0.942591	1.12982	1.33451	1.358	1.34149
Q7KZI7	Serine/threonine-protein kinase MARK2 OS=Homo sapiens OX=9606 GN=MARK2 PE=1 SV=2	MARK2	1.27792	0.0094729	None	6	4	17	4	4	87.9	2.0675e+06	2.14971e+06	2.56245e+06	1.16589e+06	1.15546e+06	1.18903e+06	0.981215	1.11984	1.06253	1.30923	1.44478	1.28878
Q9BQE4	Selenoprotein S OS=Homo sapiens OX=9606 GN=SELENOS PE=1 SV=3	SELENOS	1.27753	0.101651	None	26	3	30	3	3	21.2	3.95913e+06	3.83768e+06	4.30228e+06	2.29486e+06	2.17743e+06	1.78413e+06	1.16569	1.24025	1.10675	1.59875	1.6891	1.19971
P08236	Beta-glucuronidase OS=Homo sapiens OX=9606 GN=GUSB PE=1 SV=2	GUSB	1.27749	0.291222	None	8	4	9	4	4	74.7	2.39562e+06	1.1024e+06	1.2013e+06	892942	741156	823830	1.16322	0.58754	0.509637	1.02591	0.948158	0.913579
Q13418	Integrin-linked protein kinase OS=Homo sapiens OX=9606 GN=ILK PE=1 SV=2	ILK	1.27688	0.000955407	None	45	18	282	18	18	51.4	1.08195e+08	9.65691e+07	1.28247e+08	6.1396e+07	5.15497e+07	5.93223e+07	0.906829	0.888404	0.939135	1.21758	1.13834	1.13553
O15143	Actin-related protein 2/3 complex subunit 1B OS=Homo sapiens OX=9606 GN=ARPC1B PE=1 SV=3	ARPC1B	1.27627	0.00214474	None	66	21	321	19	21	40.9	2.30365e+08	2.22457e+08	2.7377e+08	1.32166e+08	1.08425e+08	1.36846e+08	0.918128	0.973169	0.953315	1.24637	1.13852	1.24561
Q9BWM7	Sideroflexin-3 OS=Homo sapiens OX=9606 GN=SFXN3 PE=1 SV=3	SFXN3	1.27621	0.00192983	None	33	9	135	7	7	35.5	2.59451e+07	2.56886e+07	30879980	1.43274e+07	1.37162e+07	1.4664e+07	0.914873	0.994264	0.951367	1.1954	1.27428	1.18093
Q9HD33	39S ribosomal protein L47, mitochondrial OS=Homo sapiens OX=9606 GN=MRPL47 PE=1 SV=2	MRPL47	1.27575	0.048041	None	20	5	62	5	5	29.4	1.427e+07	1.18019e+07	1.43751e+07	7.00601e+06	5643457	8.4543e+06	1.25458	1.1389	1.10421	1.45743	1.30722	1.69754
Q9Y4F5	Centrosomal protein of 170 kDa protein B OS=Homo sapiens OX=9606 GN=CEP170B PE=1 SV=4	CEP170B	1.27502	0.18407	None	2	3	17	2	2	171.6	692960	659003	850353	418425		370142	0.906092	0.945817	0.971467	1.29456		1.10534
Q9P2W9	Syntaxin-18 OS=Homo sapiens OX=9606 GN=STX18 PE=1 SV=1	STX18	1.27163	0.0592058	None	32	9	47	9	9	38.7	1.60684e+07	1.10962e+07	1.55729e+07	8.1513e+06	6.20902e+06	7.6963e+06	1.07162	0.812268	0.907411	1.28628	1.09099	1.17224
P24821	Tenascin OS=Homo sapiens OX=9606 GN=TNC PE=1 SV=3	TNC	1.27064	0.0560141	None	19	28	208	28	28	240.7	2.32486e+07	2.19087e+07	2.65779e+07	1.06458e+07	1.28288e+07	1.34043e+07	0.768848	0.795274	0.767944	0.833039	1.11778	1.0124
Q5H9R7	Serine/threonine-protein phosphatase 6 regulatory subunit 3 OS=Homo sapiens OX=9606 GN=PPP6R3 PE=1 SV=2	PPP6R3	1.26887	0.000784338	None	17	13	70	13	13	97.6	5.72837e+07	5.10971e+07	6.12399e+07	2.93446e+07	2.63403e+07	3.19244e+07	1.03416	1.01253	0.965951	1.2535	1.25287	1.31627
Q5T8D3	Acyl-CoA-binding domain-containing protein 5 OS=Homo sapiens OX=9606 GN=ACBD5 PE=1 SV=1	ACBD5	1.26865	0.00294839	None	6	3	17	3	3	60.1	1.74098e+06	1690345	1.95142e+06	958999	807920	1.01925e+06	1.03062	1.09834	1.0093	1.34327	1.26009	1.378
Q8IXB1	DnaJ homolog subfamily C member 10 OS=Homo sapiens OX=9606 GN=DNAJC10 PE=1 SV=2	DNAJC10	1.26864	0.0139361	None	35	18	159	18	18	91	4.15974e+07	3.75381e+07	44674545	2.24956e+07	1.75781e+07	2.40916e+07	0.90574	0.897151	0.849889	1.15898	1.00841	1.19803
P07237	Protein disulfide-isomerase OS=Homo sapiens OX=9606 GN=P4HB PE=1 SV=3	P4HB	1.26728	0.0001615	None	80	43	2779	43	43	57.1	3.68201e+09	3.44979e+09	4.23429e+09	2.01268e+09	1.82555e+09	2.00586e+09	0.803106	0.825917	0.806924	1.03873	1.04908	0.999201
P61106	Ras-related protein Rab-14 OS=Homo sapiens OX=9606 GN=RAB14 PE=1 SV=4	RAB14	1.26682	0.0232067	None	78	14	188	13	13	23.9	7.97509e+07	8.92232e+07	1.0361e+08	4.94473e+07	4.04694e+07	5.0857e+07	0.903721	1.10977	1.02581	1.32581	1.20824	1.31618
Q9UBP4	Dickkopf-related protein 3 OS=Homo sapiens OX=9606 GN=DKK3 PE=1 SV=2	DKK3	1.26542	0.347484	None	9	2	20	2	2	38.4	1.51547e+06	2.50212e+06	1.86723e+06		986356	1.039e+06	0.724588	1.31313	0.780021		1.24253	1.13456
Q9UKU7	Isobutyryl-CoA dehydrogenase, mitochondrial OS=Homo sapiens OX=9606 GN=ACAD8 PE=1 SV=1	ACAD8	1.2653	0.392903	None	12	4	23	4	4	45	1.77997e+06	3.69016e+06	1.182e+06	1.17202e+06	974054	1.4644e+06	0.654777	1.48999	0.379894	1.02013	0.944042	1.23029
Q8NBF2	NHL repeat-containing protein 2 OS=Homo sapiens OX=9606 GN=NHLRC2 PE=1 SV=1	NHLRC2	1.26521	0.0328196	None	12	7	47	7	7	79.4	6.05739e+06	4.74634e+06	7.63363e+06	3.30904e+06	2.76308e+06	3.32078e+06	1.05154	0.904386	1.1578	1.35919	1.26375	1.31657
[truncated: 4,013 more rows]
