# Supplementary material for: Endothelial cell-targeting aptamer-empowered exosomes accelerate wound healing by promoting specialized angiogenesis in type 1 diabetic mice
Source: Research Square preprint supplement (doi:10.21203/rs.3.rs-7518048/v1), 2025-10-17
Supplement: Supplementary file 2 [file fa72583d275dcfb62707e306.docx]

**Supplementary files**

**Endothelial cell-targeting aptamer-empowered exosomes accelerate wound healing by promoting specialized angiogenesis in type 1 diabetic mice**

*Na Zhao1#, Zi-Zhen Guo2#, Sheng-Feng Bai3#, Ying-Feng Gao4, Jing Lei5, Pei Li1, Miao Yu1, Ji Chen3,6, Hao-Kun Xu3, Li-Hui Bao4, Hua Ni4, Yi-Hua Jin7, Xin-Yu Qiu8, Yi Shuai9,10, Qiao-Ning Wang1, Bing-Dong Sui3*, Cheng-Hu Hu1*, Chen-Xi Zheng3**

1 Xi’an Key Laboratory of Stem Cell and Regenerative Medicine, Institute of Medical Research, Northwestern Polytechnical University, Xi'an, China.

2 Department of Plastic and Reconstructive Surgery, Shanghai Ninth People's Hospital, Shanghai Jiao Tong University School of Medicine, Shanghai, China.

3 State Key Laboratory of Oral & Maxillofacial Reconstruction and Regeneration, National Clinical Research Center for Oral Diseases, Shaanxi International Joint Research Center for Oral Diseases, Center for Tissue Engineering, School of Stomatology, The Fourth Military Medical University, Xi’an, China.

4 Xi'an Institute of Tissue Engineering and Regenerative Medicine, Xi'an, China.

5 Department of Obstetrics and Gynecology, Xi'an No. 4 Hospital, Affiliated Guangren Hospital, School of Medicine, Xi'an Jiaotong University, Xi'an, China.

6 Department of Oral Implantology, School of Stomatology, The Fourth Military Medical University, Xi’an, China.

7 Department of Obstetrics and Gynecology, Xijing Hospital, The Fourth Military Medical University, Xi’an, China.

8 Department of Preventive Dentistry, School of Stomatology, The Fourth Military Medical University, Xi’an, China.

9 Department of Stomatology, Jinling Hospital, Affiliated Hospital of Medical School, Nanjing University, Nanjing, China.

10 Department of Stomatology, General Hospital of Eastern Theater Command, PLA, Nanjing, China.

# These authors contributed equally to this work.

***Corresponding Authors:** [chenxizheng@fmmu.edu.cn](mailto:chenxizheng@fmmu.edu.cn) (Dr. Chen-Xi Zheng), [chenghu@nwpu.edu.cn](mailto:chenghu@nwpu.edu.cn) (Prof. Cheng-Hu Hu) and, [bingdong@fmmu.edu.cn](mailto:bingdong@fmmu.edu.cn) (Prof Bing-Dong Sui)

**
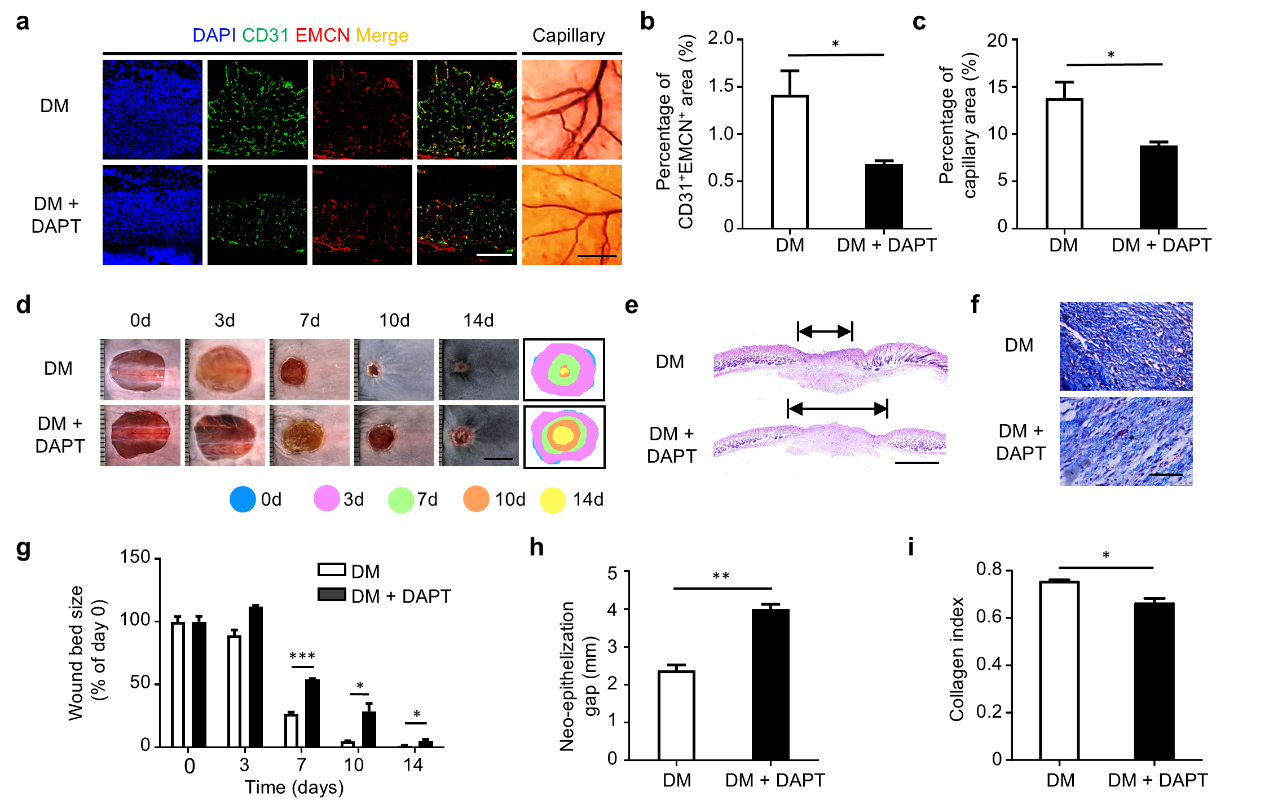
**

**SI. 1. Further inhibition of angiogenesis delays T1D wound healing**

(a) Immunofluorescent staining of CD31 (green) and EMCN (red) co-immunostaining and vascularization states of the wounded skin of control and intraperitoneally injected mice with DAPT on day 7 post-wound modeling. White scale bar: 100 μm, black scale bar: 1 cm.(b-c) Quantification of CD31+EMCN+ vessel and capillary area of the wounded skin of control and intraperitoneally injected mice with DAPT on day 7 post-wound modeling.(d) Representative photographs and schematic images of full-thickness cutaneous wounds in control and intraperitoneally injected mice with DAPT. Scale bar: 1 cm.(e) H&E staining of wound bed samples of control and intraperitoneally injected mice with DAPT on day 14 post-wound modeling showing neo-epithelization gap. Scale bar: 1 mm.(f) Masson’s trichrome staining of wound bed samples of control and intraperitoneally injected mice with DAPT on day 14 post-wound modeling showing collagen deposition. Scale bar: 100 μm. (g) Quantification of wound area of control and intraperitoneally injected mice with DAPT.(h-i) Quantification of neo-epithelization gap and collagen index of wounded skin of control and intraperitoneally injected mice with DAPT.(n=3 per group, data represent mean ± SD. *, *P* < 0.05; **, *P* < 0.01; ***, *P* < 0.001. Two-tailed unpaired Student’s *t* test).


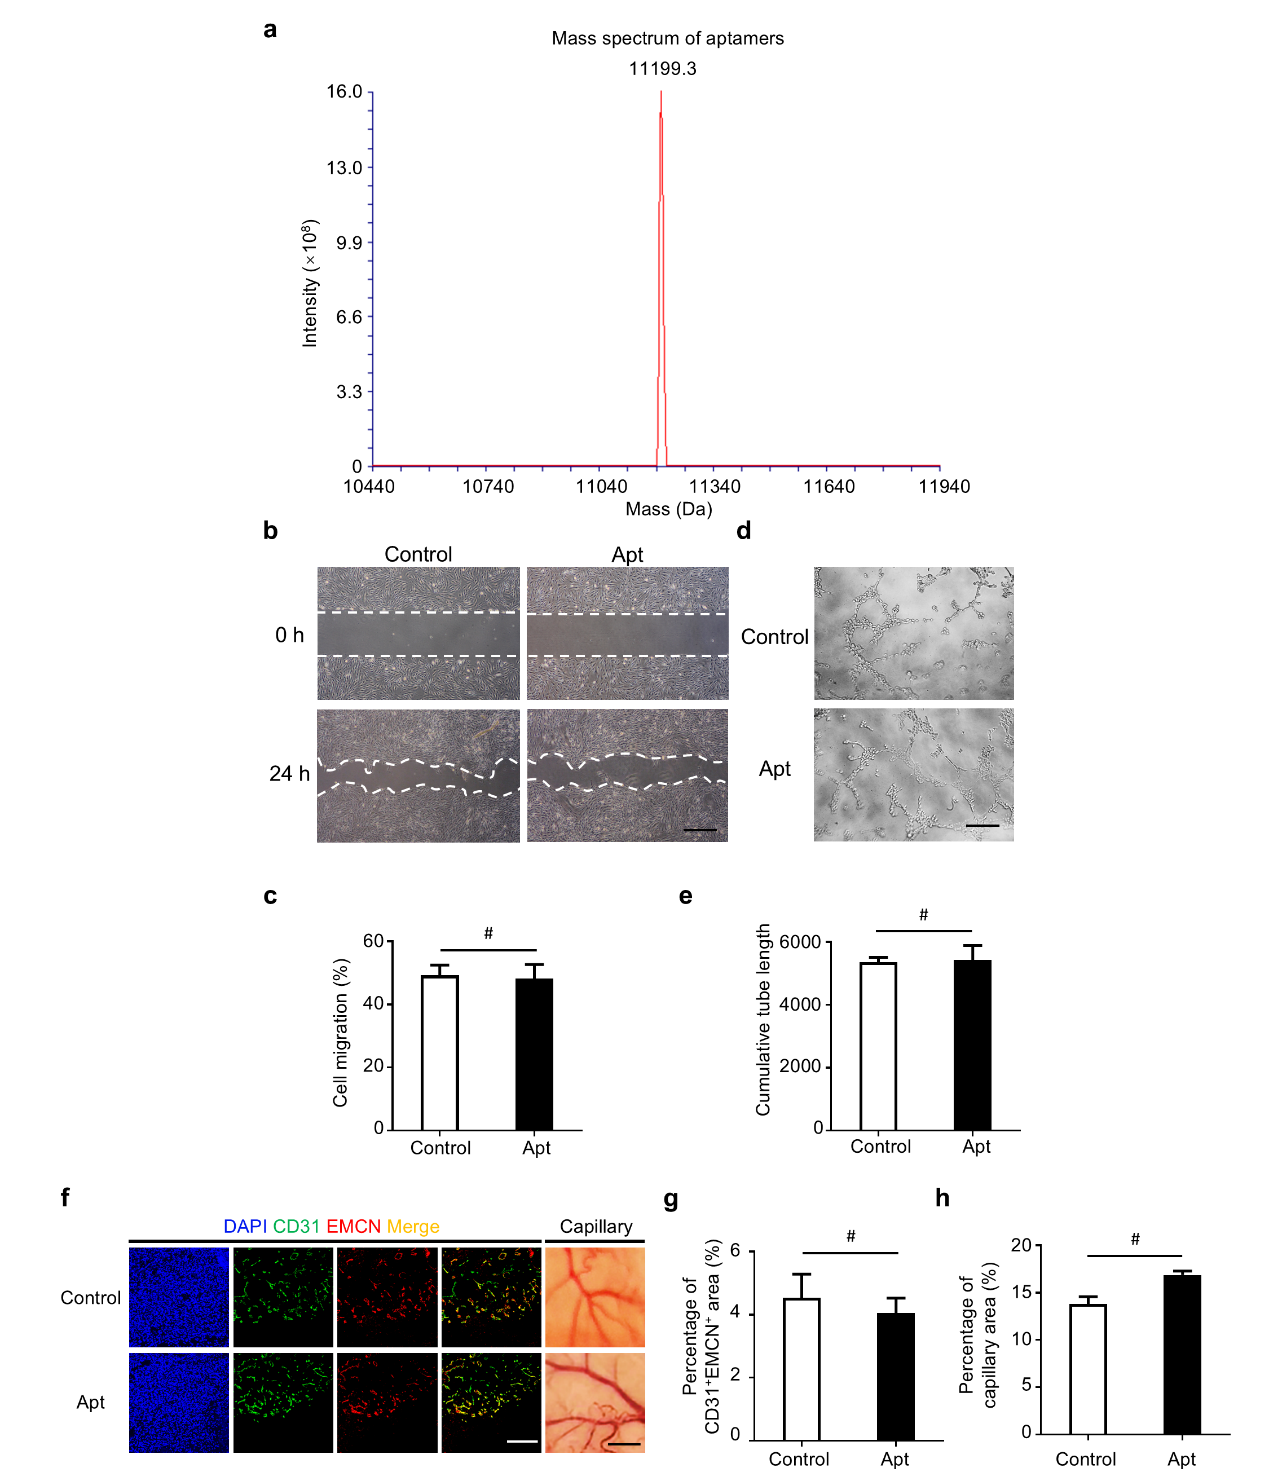


**SI. 2. Aptamers (Apt) lacks the ability to promote angiogenesis**

(a) The mass spectrum of the Apt showing the molecular weight. (b-c) Representative images and quantification of scratch assay of C166 treated by Apt at indicated timepoints. Scale bar: 300 μm.(d-e) Representative images and quantification of tube formation of C166 treated by Apt.Scale bar: 100 μm. (f) Immunofluorescent staining of CD31 (green) and Endomucin (EMCN; red) co-immunostaining and vascularization states of the wounded skin of control and diabetic mice on day 7 post-wound modeling. White scale bar: 100 μm, black scale bar: 1 cm. (g-h) Quantification of CD31+EMCN+ vessel and capillary area at the wounded skin of control and Apt group on day 7 post-wound modeling.(n=3 per group, data represent mean ± SD. #*P* > 0.05. Two-tailed unpaired Student’s *t* test).


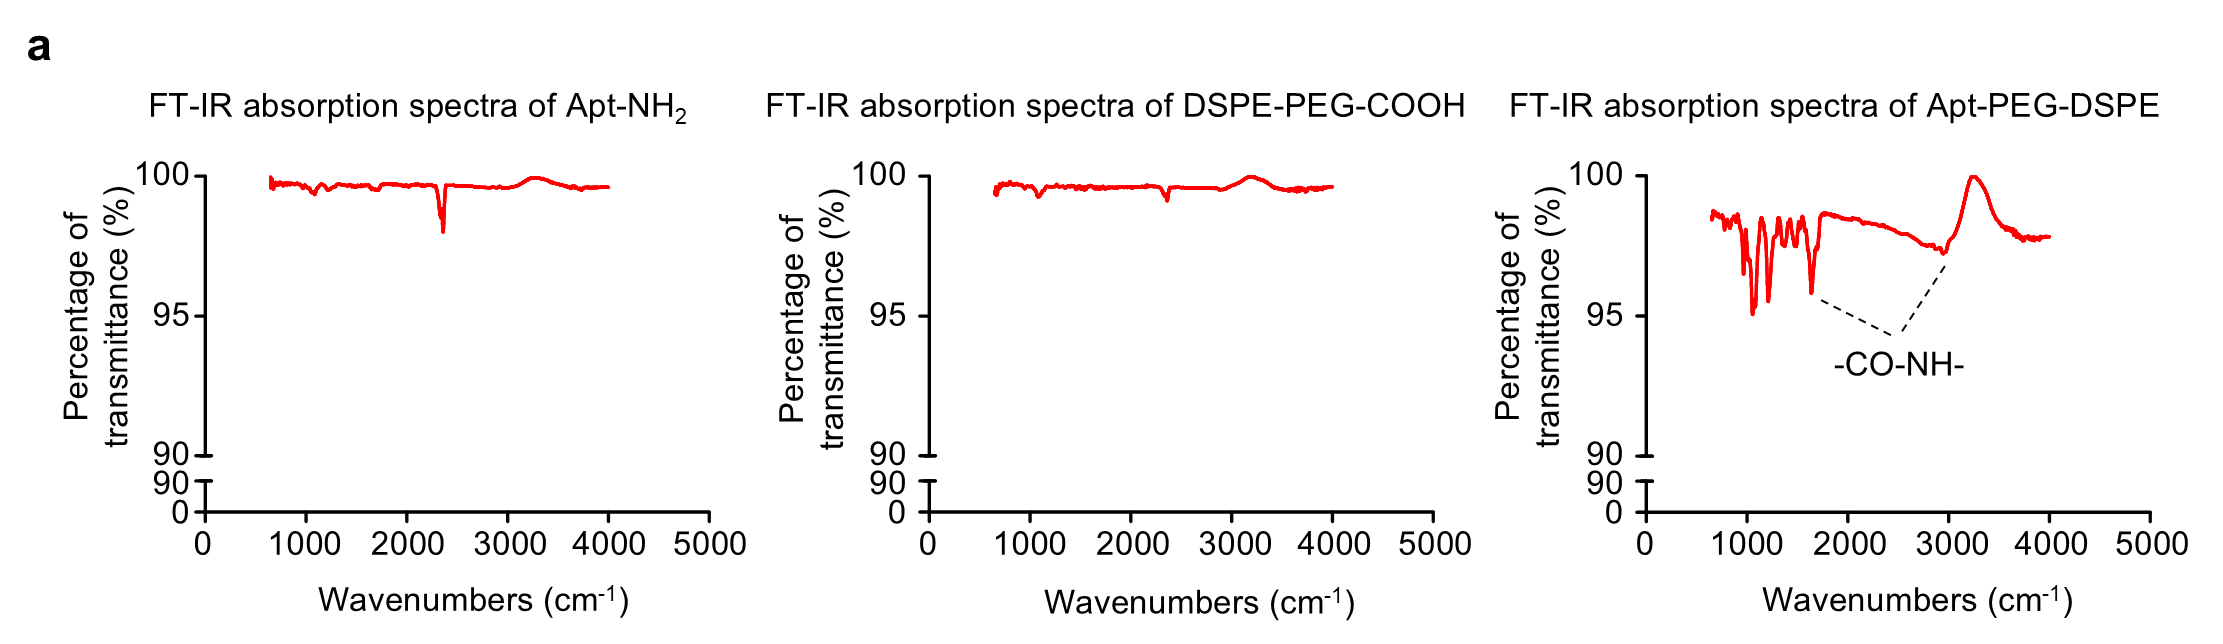


**SI. 3. Identification of** **Apt-PEG-DSPE**

(a) Fourier transform infrared (FT-IR) spectrum of Apt-PEG-DSPE showing the formation of amide bonds.
